# Supplementary material for: Multi-component cascade reaction of 3-formylchromones: highly selective synthesis of 4,5-dihydro-[4,5′-bipyrimidin]-6(1H)-one derivatives
Source: Royal Society of Chemistry journal article supplement (doi:10.1039/d1cc02437j), 2021-01-01
Supplement: d1cc02437j1.pdf [file d1cc02437j1.pdf]

# Multi-component Cascade Reaction of 3-Formylchromones: Highly Selective Synthesis of 4,5-Dihydro-[4,5'-bipyrimidin] -6(1*H*)-one Derivatives

Li Chen, Rong-Huang, Xing-Han Yun, Tian-Hui Hao and Sheng-Jiao Yan\*

*Key Laboratory of Medicinal Chemistry for Natural Resources, Ministry of Education;  
Yunnan Provincial Center for Research & Development of Natural Products; School  
of Chemical Science and Technology, Yunnan University, Kunming, 650091, P. R.  
China*

## Supporting Information

### Table of Contents:

|                                                                                                                     |     |
|---------------------------------------------------------------------------------------------------------------------|-----|
| General Information.....                                                                                            | S4  |
| Optimized Conditions for the Synthesis of <b>4b</b> & <b>5d</b> .....                                               | S4  |
| <b>Table S1</b> Optimized conditions for the synthesis of <b>4b</b> & <b>5d</b> .....                               | S4  |
| General Procedure for the Preparation of <b>4</b> and <b>5</b> .....                                                | S6  |
| Spectroscopic Data of <b>4a-5v</b> .....                                                                            | S7  |
| The Proposed Mechanism of the Cascade Reaction.....                                                                 | S25 |
| <b>Scheme S1</b> . The proposed mechanism of the cascade reaction.....                                              | S25 |
| Control Experiments.....                                                                                            | S27 |
| <b>Scheme S2</b> . Control experiments.....                                                                         | S27 |
| X-ray Structure and Data of <b>4j</b> and <b>5d</b> .....                                                           | S29 |
| <b>Figure S1</b> . X-Ray crystal structure of <b>4j</b> .....                                                       | S29 |
| <b>Table S2</b> . Crystal data and structure refinement for <b>4j</b> .....                                         | S29 |
| <b>Table S3</b> . Bond Lengths for <b>4j</b> .....                                                                  | S30 |
| <b>Table S4</b> . Bond Angles for <b>4j</b> .....                                                                   | S30 |
| <b>Figure S2</b> . X-Ray crystal structure of <b>5d</b> .....                                                       | S32 |
| <b>Table S5</b> . Crystal data and structure refinement for <b>5d</b> .....                                         | S32 |
| <b>Table S6</b> . Bond Lengths [Å] for <b>5d</b> .....                                                              | S33 |
| <b>Table S7</b> . Bond Angles for <b>5d</b> .....                                                                   | S33 |
| <b>Figure S3</b> . <sup>1</sup> H NMR (600 MHz, DMSO- <i>d</i> <sub>6</sub> ) spectra of compound <b>4a</b> .....   | S35 |
| <b>Figure S4</b> . <sup>13</sup> C NMR (150 MHz, DMSO- <i>d</i> <sub>6</sub> ) spectra of compound <b>4a</b> .....  | S36 |
| <b>Figure S5</b> . <sup>1</sup> H NMR (600 MHz, DMSO- <i>d</i> <sub>6</sub> ) spectra of compound <b>4b</b> .....   | S37 |
| <b>Figure S6</b> . <sup>13</sup> C NMR (150 MHz, DMSO- <i>d</i> <sub>6</sub> ) spectra of compound <b>4b</b> .....  | S38 |
| <b>Figure S7</b> . <sup>1</sup> H NMR (600 MHz, DMSO- <i>d</i> <sub>6</sub> ) spectra of compound <b>4c</b> .....   | S39 |
| <b>Figure S8</b> . <sup>13</sup> C NMR (150 MHz, DMSO- <i>d</i> <sub>6</sub> ) spectra of compound <b>4c</b> .....  | S40 |
| <b>Figure S9</b> . <sup>1</sup> H NMR (600 MHz, DMSO- <i>d</i> <sub>6</sub> ) spectra of compound <b>4d</b> .....   | S41 |
| <b>Figure S10</b> . <sup>13</sup> C NMR (150 MHz, DMSO- <i>d</i> <sub>6</sub> ) spectra of compound <b>4d</b> ..... | S42 |
| <b>Figure S11</b> . <sup>1</sup> H NMR (600 MHz, DMSO- <i>d</i> <sub>6</sub> ) spectra of compound <b>4e</b> .....  | S43 |
| <b>Figure S12</b> . <sup>13</sup> C NMR (150 MHz, DMSO- <i>d</i> <sub>6</sub> ) spectra of compound <b>4e</b> ..... | S44 |
| <b>Figure S13</b> . <sup>1</sup> H NMR (600 MHz, CDCl <sub>3</sub> ) spectra of compound <b>4f</b> .....            | S45 |

|                    |                                                                                       |     |
|--------------------|---------------------------------------------------------------------------------------|-----|
| <b>Figure S14.</b> | $^{13}\text{C}$ NMR (150 MHz, $\text{CDCl}_3$ ) spectra of compound <b>4f</b> .....   | S46 |
| <b>Figure S15.</b> | $^1\text{H}$ NMR (600 MHz, $\text{DMSO-}d_6$ ) spectra of compound <b>4g</b> .....    | S47 |
| <b>Figure S16.</b> | $^{13}\text{C}$ NMR (150 MHz, $\text{DMSO-}d_6$ ) spectra of compound <b>4g</b> ..... | S48 |
| <b>Figure S17.</b> | $^1\text{H}$ NMR (600 MHz, $\text{DMSO-}d_6$ ) spectra of compound <b>4h</b> .....    | S49 |
| <b>Figure S18.</b> | $^{13}\text{C}$ NMR (150 MHz, $\text{DMSO-}d_6$ ) spectra of compound <b>4h</b> ..... | S50 |
| <b>Figure S19.</b> | $^1\text{H}$ NMR (600 MHz, $\text{DMSO-}d_6$ ) spectra of compound <b>4i</b> .....    | S51 |
| <b>Figure S20.</b> | $^{13}\text{C}$ NMR (150 MHz, $\text{DMSO-}d_6$ ) spectra of compound <b>4i</b> ..... | S52 |
| <b>Figure S21.</b> | $^{19}\text{F}$ NMR (564 MHz, $\text{DMSO-}d_6$ ) spectra of compound <b>4i</b> ..... | S53 |
| <b>Figure S22.</b> | $^1\text{H}$ NMR (600 MHz, $\text{CDCl}_3$ ) spectra of compound <b>4j</b> .....      | S54 |
| <b>Figure S23.</b> | $^{13}\text{C}$ NMR (150 MHz, $\text{CDCl}_3$ ) spectra of compound <b>4j</b> .....   | S55 |
| <b>Figure S24.</b> | $^{19}\text{F}$ NMR (564 MHz, $\text{CDCl}_3$ ) spectra of compound <b>4j</b> .....   | S56 |
| <b>Figure S25.</b> | $^1\text{H}$ NMR (600 MHz, $\text{CDCl}_3$ ) spectra of compound <b>4k</b> .....      | S57 |
| <b>Figure S26.</b> | $^{13}\text{C}$ NMR (150 MHz, $\text{CDCl}_3$ ) spectra of compound <b>4k</b> .....   | S58 |
| <b>Figure S27.</b> | $^1\text{H}$ NMR (600 MHz, $\text{DMSO-}d_6$ ) spectra of compound <b>4l</b> .....    | S59 |
| <b>Figure S28.</b> | $^{13}\text{C}$ NMR (150 MHz, $\text{DMSO-}d_6$ ) spectra of compound <b>4l</b> ..... | S60 |
| <b>Figure S29.</b> | $^1\text{H}$ NMR (600 MHz, $\text{DMSO-}d_6$ ) spectra of compound <b>5a</b> .....    | S61 |
| <b>Figure S30.</b> | $^{13}\text{C}$ NMR (150 MHz, $\text{DMSO-}d_6$ ) spectra of compound <b>5a</b> ..... | S62 |
| <b>Figure S31.</b> | $^1\text{H}$ NMR (600 MHz, $\text{DMSO-}d_6$ ) spectra of compound <b>5b</b> .....    | S63 |
| <b>Figure S32.</b> | $^{13}\text{C}$ NMR (150 MHz, $\text{DMSO-}d_6$ ) spectra of compound <b>5b</b> ..... | S64 |
| <b>Figure S33.</b> | $^1\text{H}$ NMR (600 MHz, $\text{DMSO-}d_6$ ) spectra of compound <b>5c</b> .....    | S65 |
| <b>Figure S34.</b> | $^{13}\text{C}$ NMR (150 MHz, $\text{DMSO-}d_6$ ) spectra of compound <b>5c</b> ..... | S66 |
| <b>Figure S35.</b> | $^{19}\text{F}$ NMR (564 MHz, $\text{DMSO-}d_6$ ) spectra of compound <b>5c</b> ..... | S67 |
| <b>Figure S36.</b> | $^1\text{H}$ NMR (600 MHz, $\text{DMSO-}d_6$ ) spectra of compound <b>5d</b> .....    | S68 |
| <b>Figure S37.</b> | $^{13}\text{C}$ NMR (150 MHz, $\text{DMSO-}d_6$ ) spectra of compound <b>5d</b> ..... | S69 |
| <b>Figure S38.</b> | $^1\text{H}$ NMR (600 MHz, $\text{DMSO-}d_6$ ) spectra of compound <b>5e</b> .....    | S70 |
| <b>Figure S39.</b> | $^{13}\text{C}$ NMR (150 MHz, $\text{DMSO-}d_6$ ) spectra of compound <b>5e</b> ..... | S71 |
| <b>Figure S40.</b> | $^1\text{H}$ NMR (600 MHz, $\text{DMSO-}d_6$ ) spectra of compound <b>5f</b> .....    | S72 |
| <b>Figure S41.</b> | $^{13}\text{C}$ NMR (150 MHz, $\text{DMSO-}d_6$ ) spectra of compound <b>5f</b> ..... | S73 |
| <b>Figure S42.</b> | $^1\text{H}$ NMR (600 MHz, $\text{DMSO-}d_6$ ) spectra of compound <b>5g</b> .....    | S74 |
| <b>Figure S43.</b> | $^{13}\text{C}$ NMR (150 MHz, $\text{DMSO-}d_6$ ) spectra of compound <b>5g</b> ..... | S75 |
| <b>Figure S44.</b> | $^1\text{H}$ NMR (600 MHz, $\text{DMSO-}d_6$ ) spectra of compound <b>5h</b> .....    | S76 |
| <b>Figure S45.</b> | $^{13}\text{C}$ NMR (150 MHz, $\text{DMSO-}d_6$ ) spectra of compound <b>5h</b> ..... | S77 |
| <b>Figure S46.</b> | $^1\text{H}$ NMR (600 MHz, $\text{DMSO-}d_6$ ) spectra of compound <b>5i</b> .....    | S78 |
| <b>Figure S47.</b> | $^{13}\text{C}$ NMR (150 MHz, $\text{DMSO-}d_6$ ) spectra of compound <b>5i</b> ..... | S79 |
| <b>Figure S48.</b> | $^1\text{H}$ NMR (600 MHz, $\text{DMSO-}d_6$ ) spectra of compound <b>5j</b> .....    | S80 |
| <b>Figure S49.</b> | $^{13}\text{C}$ NMR (150 MHz, $\text{DMSO-}d_6$ ) spectra of compound <b>5j</b> ..... | S81 |
| <b>Figure S50.</b> | $^1\text{H}$ NMR (600 MHz, $\text{DMSO-}d_6$ ) spectra of compound <b>5k</b> .....    | S82 |
| <b>Figure S51.</b> | $^{13}\text{C}$ NMR (150 MHz, $\text{DMSO-}d_6$ ) spectra of compound <b>5k</b> ..... | S83 |
| <b>Figure S52.</b> | $^{19}\text{F}$ NMR (564 MHz, $\text{DMSO-}d_6$ ) spectra of compound <b>5k</b> ..... | S84 |
| <b>Figure S53.</b> | $^1\text{H}$ NMR (600 MHz, $\text{DMSO-}d_6$ ) spectra of compound <b>5l</b> .....    | S85 |
| <b>Figure S54.</b> | $^{13}\text{C}$ NMR (150 MHz, $\text{DMSO-}d_6$ ) spectra of compound <b>5l</b> ..... | S86 |
| <b>Figure S55.</b> | $^{19}\text{F}$ NMR (564 MHz, $\text{DMSO-}d_6$ ) spectra of compound <b>5l</b> ..... | S87 |
| <b>Figure S56.</b> | $^1\text{H}$ NMR (600 MHz, $\text{DMSO-}d_6$ ) spectra of compound <b>5m</b> .....    | S88 |
| <b>Figure S57.</b> | $^{13}\text{C}$ NMR (150 MHz, $\text{DMSO-}d_6$ ) spectra of compound <b>5m</b> ..... | S89 |
| <b>Figure S58.</b> | $^{19}\text{F}$ NMR (564 MHz, $\text{DMSO-}d_6$ ) spectra of compound <b>5m</b> ..... | S90 |
| <b>Figure S59.</b> | $^1\text{H}$ NMR (600 MHz, $\text{DMSO-}d_6$ ) spectra of compound <b>5n</b> .....    | S91 |
| <b>Figure S60.</b> | $^{13}\text{C}$ NMR (150 MHz, $\text{DMSO-}d_6$ ) spectra of compound <b>5n</b> ..... | S92 |
| <b>Figure S61.</b> | $^{19}\text{F}$ NMR (564 MHz, $\text{DMSO-}d_6$ ) spectra of compound <b>5n</b> ..... | S93 |
| <b>Figure S62.</b> | $^1\text{H}$ NMR (600 MHz, $\text{DMSO-}d_6$ ) spectra of compound <b>5o</b> .....    | S94 |

|                                                                                                              |      |
|--------------------------------------------------------------------------------------------------------------|------|
| <b>Figure S63.</b> $^{13}\text{C}$ NMR (150 MHz, $\text{DMSO-}d_6$ ) spectra of compound <b>5o</b> .....     | S95  |
| <b>Figure S64.</b> $^{19}\text{F}$ NMR (564 MHz, $\text{DMSO-}d_6$ ) spectra of compound <b>5o</b> .....     | S96  |
| <b>Figure S65.</b> $^1\text{H}$ NMR (600 MHz, $\text{DMSO-}d_6$ ) spectra of compound <b>5p</b> .....        | S97  |
| <b>Figure S66.</b> $^{13}\text{C}$ NMR (150 MHz, $\text{DMSO-}d_6$ ) spectra of compound <b>5p</b> .....     | S98  |
| <b>Figure S67.</b> $^{19}\text{F}$ NMR (564 MHz, $\text{DMSO-}d_6$ ) spectra of compound <b>5p</b> .....     | S99  |
| <b>Figure S68.</b> $^1\text{H}$ NMR (600 MHz, $\text{DMSO-}d_6$ ) spectra of compound <b>5q</b> .....        | S100 |
| <b>Figure S69.</b> $^{13}\text{C}$ NMR (150 MHz, $\text{DMSO-}d_6$ ) spectra of compound <b>5q</b> .....     | S101 |
| <b>Figure S70.</b> $^1\text{H}$ NMR (564 MHz, $\text{DMSO-}d_6$ ) spectra of compound <b>5r</b> .....        | S102 |
| <b>Figure S71.</b> $^{13}\text{C}$ NMR (150 MHz, $\text{DMSO-}d_6$ ) spectra of compound <b>5r</b> .....     | S103 |
| <b>Figure S72.</b> $^1\text{H}$ NMR (600 MHz, $\text{DMSO-}d_6$ ) spectra of compound <b>5s</b> .....        | S104 |
| <b>Figure S73.</b> $^{13}\text{C}$ NMR (150 MHz, $\text{DMSO-}d_6$ ) spectra of compound <b>5s</b> .....     | S105 |
| <b>Figure S74.</b> $^{19}\text{F}$ NMR (564 MHz, $\text{DMSO-}d_6$ ) spectra of compound <b>5s</b> .....     | S106 |
| <b>Figure S75.</b> $^1\text{H}$ NMR (600 MHz, $\text{DMSO-}d_6$ ) spectra of compound <b>5t</b> .....        | S107 |
| <b>Figure S76.</b> $^{13}\text{C}$ NMR (150 MHz, $\text{DMSO-}d_6$ ) spectra of compound <b>5t</b> .....     | S108 |
| <b>Figure S77.</b> $^1\text{H}$ NMR (600 MHz, $\text{DMSO-}d_6$ ) spectra of compound <b>5u</b> .....        | S109 |
| <b>Figure S78.</b> $^{13}\text{C}$ NMR (150 MHz, $\text{DMSO-}d_6$ ) spectra of compound <b>5u</b> .....     | S110 |
| <b>Figure S79.</b> $^1\text{H}$ NMR (600 MHz, $\text{DMSO-}d_6$ ) spectra of compound <b>5v</b> .....        | S111 |
| <b>Figure S80.</b> $^{13}\text{C}$ NMR (150 MHz, $\text{DMSO-}d_6$ ) spectra of compound <b>5v</b> .....     | S112 |
| <b>Figure S81.</b> $^1\text{H}$ NMR (600 MHz, $\text{DMSO-}d_6$ ) spectra of intermediate <b>9f</b> .....    | S113 |
| <b>Figure S82.</b> $^{13}\text{C}$ NMR (150 MHz, $\text{DMSO-}d_6$ ) spectra of intermediate <b>9f</b> ..... | S114 |
| <b>Figure S83.</b> HPLC of the reaction mixture .....                                                        | S115 |
| <b>Figure S84.</b> HRMS of intermediate <b>1f</b> .....                                                      | S116 |
| <b>Figure S85.</b> HRMS of intermediate <b>2a/6a</b> .....                                                   | S117 |
| <b>Figure S86.</b> HRMS of intermediate <b>7f/8f</b> .....                                                   | S118 |
| <b>Figure S87.</b> HRMS of intermediate <b>9f/10f</b> .....                                                  | S119 |
| <b>Figure S88.</b> HRMS of intermediate <b>9f/10f</b> .....                                                  | S120 |
| <b>Figure S89.</b> HRMS of intermediate <b>12f/13f</b> .....                                                 | S121 |
| <b>Figure S90.</b> HRMS of intermediate <b>12f/13f</b> .....                                                 | S122 |
| <b>Figure S91.</b> HRMS of intermediate <b>14f</b> .....                                                     | S123 |
| <b>Figure S92.</b> HRMS of intermediate <b>15f/16f</b> .....                                                 | S124 |
| <b>Figure S93.</b> HRMS of intermediate <b>15f/16f</b> .....                                                 | S125 |
| <b>Figure S94.</b> HPLC of the reaction mixture .....                                                        | S126 |
| <b>Figure S95.</b> HRMS of intermediate <b>4</b> .....                                                       | S127 |
| <b>Figure S96.</b> HRMS of intermediate <b>5f</b> .....                                                      | S128 |

## General Information

All compounds were fully characterised by spectroscopic data. The NMR spectra were recorded on a Bruker DRX600. Chemical shifts ( $\delta$ ) are expressed in ppm,  $J$  values are given in Hz, and deuterated DMSO- $d_6$  or  $CDCl_3$  was used as solvent, the solvent residue in DMSO- $d_6$  ( $^{13}C$ NMR: 39.52 ppm,  $^1H$  NMR, 2.50 ppm; the solvent residue in  $CDCl_3$  ( $^{13}C$ NMR: 7.26 ppm,  $^1H$  NMR, 77.16 ppm). IR spectra were recorded on a FT-IR Thermo Nicolet Avatar 360 using a KBr pellet. The reactions were monitored by thin layer chromatography (TLC) using silica gel GF<sub>254</sub>. The melting points were determined on a XT-4A melting point apparatus and are uncorrected. HRMs were performed on an Agilent LC/Msd TOF instrument.

The materials were purchased from Adamas-beta Corporation Limited. All chemicals and solvents were used as received without further purification unless otherwise stated. Two kinds of reagents which were used in the experiment were commercially available reagents.

## Optimized Conditions for the Synthesis of 4b & 5d

**Table S1** Optimized conditions for the synthesis of **4b** & **5d**<sup>a</sup>

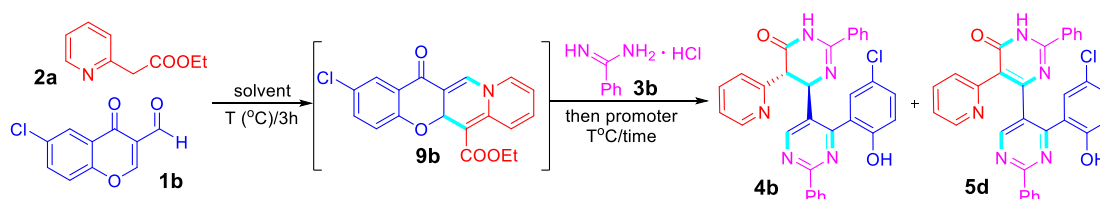

| Entry | Solvent               | Promoter                                     | T (°C) | Time (h) | <b>4b/5d</b> (%) <sup>b</sup> |
|-------|-----------------------|----------------------------------------------|--------|----------|-------------------------------|
| 1     | EtOH                  | Cs <sub>2</sub> CO <sub>3</sub>              | reflux | 9        | –/–                           |
| 2     | MeCN                  | Cs <sub>2</sub> CO <sub>3</sub>              | reflux | 9        | 72/–                          |
| 3     | H <sub>2</sub> O      | Cs <sub>2</sub> CO <sub>3</sub>              | reflux | 9        | –/–                           |
| 4     | 1,4-dioxane           | Cs <sub>2</sub> CO <sub>3</sub>              | reflux | 9        | 14/33                         |
| 5     | DMF                   | Cs <sub>2</sub> CO <sub>3</sub>              | 110    | 9        | –/83                          |
| 6     | PC                    | Cs <sub>2</sub> CO <sub>3</sub>              | 110    | 9        | –/–                           |
| 7     | PE (1000)             | Cs <sub>2</sub> CO <sub>3</sub>              | 110    | 9        | –/–                           |
| 8     | [OMIM]PF <sub>6</sub> | Cs <sub>2</sub> CO <sub>3</sub>              | 110    | 9        | –/–                           |
| 9     | MeCN                  | K <sub>2</sub> CO <sub>3</sub>               | reflux | 9        | 53/–                          |
| 10    | MeCN                  | Et <sub>3</sub> N                            | reflux | 9        | –/–                           |
| 11    | MeCN                  | Cs <sub>2</sub> CO <sub>3</sub> <sup>c</sup> | reflux | 9        | 58/–                          |
| 12    | MeCN                  | Cs <sub>2</sub> CO <sub>3</sub> <sup>d</sup> | reflux | 9        | 70/–                          |
| 13    | MeCN                  | Cs <sub>2</sub> CO <sub>3</sub>              | reflux | 7        | 76/–                          |
| 14    | MeCN                  | Cs <sub>2</sub> CO <sub>3</sub>              | reflux | 11       | 71/trace                      |
| 15    | DMF                   | K <sub>2</sub> CO <sub>3</sub>               | 110    | 9        | trace/32                      |
| 16    | DMF                   | DBU                                          | 110    | 9        | 20/64                         |
| 17    | DMF                   | Cs <sub>2</sub> CO <sub>3</sub>              | 100    | 9        | 15/75                         |
| 18    | DMF                   | Cs <sub>2</sub> CO <sub>3</sub>              | 120    | 9        | –/81                          |
| 19    | DMF                   | Cs <sub>2</sub> CO <sub>3</sub>              | 110    | 7        | –/83                          |

<sup>a</sup> The reaction conditions: **1** (0.5 mmol), **2** (0.5 mmol), **3** (1.1 mmol), and promoter (2.0 equiv.) in 3.0 mL of solvent. <sup>b</sup> Isolated yield based on **1**. <sup>c</sup> Promoter (1.0 equiv.). <sup>d</sup> Promoter (2.5 equiv.).

The cascade reaction of 3-formylchromone **1b**, ethyl 2-(pyridine-2-yl)acetate **2a** and benzimidamide hydrochloride **3b** was used as the model reaction to determinate the optimal conditions including the solvent, promoter, temperature, and time. We first explored the effect of different solvents, such as ethanol, acetonitrile, water, 1,4-dioxane, DMF, PEG1000, 3-methyl-1-octylimidazolium hexafluorophosphate ([OMIM]PF<sub>6</sub>), and propylene carbonate (PC) on the reaction yield. From the solvent screen, we discovered that acetonitrile was the optimal solvent for the synthesis of 4,5-dihydro-[4,5'-bipyrimidin]-6(1*H*)-one (DBPMO) **4b**, furnishing the product in 72% yield (Table S1, entry 2 vs. entry 1 and entries 3–8). Interestingly, DMF (in the presence of Cs<sub>2</sub>CO<sub>3</sub>) favored the formation of [4,5'-bipyrimidin]-6(1*H*)-one (BPMO) **5d** (Table S1, entry 5 vs. entries 1–4 and 6–8). Next, we screened different bases, including K<sub>2</sub>CO<sub>3</sub>, Et<sub>3</sub>N, and Cs<sub>2</sub>CO<sub>3</sub>, that would promote the generation of target compound **4b** in high yield. From this base screen, we determined and that Cs<sub>2</sub>CO<sub>3</sub> was the optimal base for promoting this reaction (Table S1, entry 2 vs. 9–10). After screening the amount of Cs<sub>2</sub>CO<sub>3</sub>, we found that 2.0 equiv. of Cs<sub>2</sub>CO<sub>3</sub> was ideal for promoting this cascade reaction (Table S1, entry 2 vs. 11–12). Finally, the reaction time was assessed, and it was determined that 7 hours was most beneficial for enabling high-yielding reactions (Table S1, entry 2 vs. 13–14). Based on the above results, we determined that the optimal conditions for selective synthesis of compound **4b** entailed acetonitrile as the solvent, 2.0 equiv. of Cs<sub>2</sub>CO<sub>3</sub> as the base promoter, and stirring at reflux for about 7 hours (Table S1, entry 13).

As previously mentioned, the use of DMF as the solvent in the presence of Cs<sub>2</sub>CO<sub>3</sub> led to the selective formation of product **5d**. In an attempt to determine the optimal conditions to enable the selective synthesis of **5d**, different base promoters, including K<sub>2</sub>CO<sub>3</sub> and DBU, were screened in this reaction. The results of the base screen showed that Cs<sub>2</sub>CO<sub>3</sub> was the optimal base for promoting this reaction (Table S1, entry 5 vs. 15–16). We then screened the reaction temperature, the results of which demonstrated that 110 °C was the optimal temperature for this cascade reaction (Table S1, entry 5 vs. 17–18). Lastly, after a reaction duration screen, it was determined that a reaction time of 10 hours selectively afforded **5d** in excellent yield (83%). Therefore, the results of the reaction optimization indicated that DMF as the solvent, 2.0 equiv. of Cs<sub>2</sub>CO<sub>3</sub> as the base promoter, a temperature of 110 °C, and a duration of about 7 hours was best-suited for the selective synthesis of compound **5d** (Table S1, entry 19).

## General Procedure for the Preparation of 4 and 5

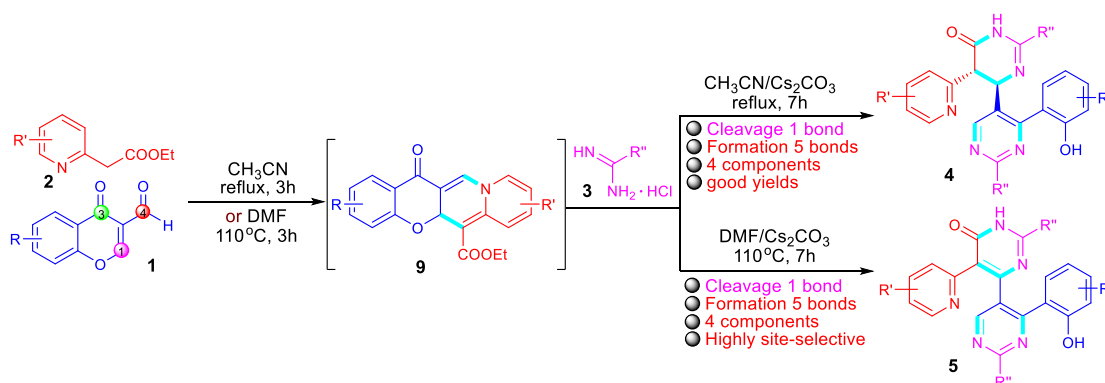

A round-bottom flask was charged with the chromone-3-carboxaldehyde **1** (0.5 mmol). Then, the flask was supplemented with MeCN (3 mL) and ethyl 2-(pyridin-2-yl)acetate **2** (0.5 mmol), and the mixture was stirred under reflux for approximately 3 hours while monitoring the reaction by TLC until the intermediate was completely consumed. Next, intermediate **3** (1.1 mmol) and  $\text{Cs}_2\text{CO}_3$  (2.0 equiv.) were subsequently added to the above mixture, which was stirred under reflux for 7 hours until the substrates were completely consumed. After cooling the reaction to room temperature, the mixture was extracted with ethyl acetate ( $3 \times 15$  mL). The organic layer was washed with water and brine, and the combined organic phases were dried over  $\text{MgSO}_4$ , filtered, and concentrated under reduced pressure to afford the crude product. Finally, product **4** was purified from the crude mixture by flash column chromatography over silica gel using a mixture of petroleum ether/ethyl acetate (2:1-1:1, v/v) as the eluent.

A round-bottom flask was charged with the chromone-3-carboxaldehyde **1** (0.5 mmol). Then, the flask was supplemented with DMF (3 mL) and ethyl 2-(pyridin-2-yl)acetate **2** (0.5 mmol), and the mixture was stirred at  $110^\circ\text{C}$  for approximately 3 hours while monitoring the reaction by TLC until the intermediate was completely consumed. Next, intermediate **3** (1.1 mmol) and  $\text{Cs}_2\text{CO}_3$  (2.0 equiv.) were subsequently added to the above mixture, which was stirred at  $110^\circ\text{C}$  for 7 hours until the substrates were completely consumed. After cooling the reaction to room temperature, the mixture was extracted with ethyl acetate ( $3 \times 15$  mL). The organic layer was washed with water and brine, and the combined organic phases were dried over  $\text{MgSO}_4$ , filtered, and concentrated under reduced pressure to afford the crude product. Finally, product **5** was purified from the crude mixture by flash column chromatography over silica gel using a mixture of petroleum ether/ethyl acetate (2:1-1:1, v/v) as the eluent.

## Spectroscopic Data of 4a-5v

### **4'-(2-Hydroxy-5-nitrophenyl)-2,2'-diphenyl-5-(pyridin-2-yl)-4,5-dihydro-[4,5'-bipyrimidin]-6(1H)-one (4a)**

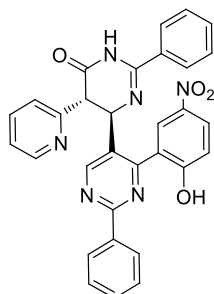

White solid (83%, 225 mg); Mp: 253.2-254.3 °C; IR (KBr): 3766, 3409, 2273, 1613, 1589, 1473, 1134, 1075, 757, 647, 540 cm<sup>-1</sup>; <sup>1</sup>H NMR (600 MHz, DMSO-*d*<sub>6</sub>): δ = 4.26 (d, *J* = 12.7 Hz, 1H, CH), 5.35 (d, *J* = 12.8 Hz, 1H, CH), 6.65 (s, 1H, ArH), 6.72-6.89 (m, 2H, ArH), 7.17-7.19 (m, 1H, ArH), 7.43-7.55 (m, 8H, ArH), 7.96-8.01 (m, 2H, ArH), 8.18 (t, *J* = 4.0 Hz, 1H, ArH), 8.33-8.35 (m, 2H, ArH), 9.06 (s, 1H, ArH), 10.15 (s, 1H, ArOH), 11.18 (s, 1H, NH) ppm; <sup>13</sup>C NMR (150 MHz, DMSO-*d*<sub>6</sub>): δ = 53.4, 59.6, 110.6, 118.4, 122.4, 125.2, 127.8, 127.8, 127.8, 128.2, 128.2, 128.8, 128.8, 129.2, 129.2, 131.2, 131.5, 131.5, 133.2, 133.3, 133.7, 136.6, 137.4, 149.5, 152.6, 153.8, 156.2, 158.6, 162.3, 162.4, 170.9 ppm. HRMS (TOF ES<sup>+</sup>): *m/z* calcd for C<sub>31</sub>H<sub>23</sub>N<sub>6</sub>O<sub>4</sub> [(M+H)<sup>+</sup>], 543.1775; found, 543.1762.

### **4'-(5-Chloro-2-hydroxyphenyl)-2,2'-diphenyl-5-(pyridin-2-yl)-4,5-dihydro-[4,5'-bipyrimidin]-6(1H)-one (4b)**

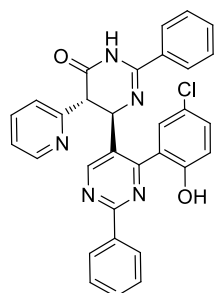

White solid (76%, 202 mg); Mp: 225.4-226.6 °C; IR (KBr): 3422, 2374, 1693, 1604, 1434, 1377, 1105, 702, 653, 616, 572 cm<sup>-1</sup>; <sup>1</sup>H NMR (600 MHz, DMSO-*d*<sub>6</sub>): δ = 4.24 (d, *J* = 12.5 Hz, 1H, CH), 5.36 (d, *J* = 12.7 Hz, 1H, CH), 6.53 (s, 1H, ArH), 6.87 (d, *J* = 7.6 Hz, 1H, ArH), 6.93 (d, *J* = 8.7 Hz, 1H, ArH), 7.15-7.17 (m, 1H, ArH), 7.31-7.32 (m, 1H, ArH), 7.47-7.56 (m, 7H, ArH), 7.97 (d, *J* = 7.6 Hz, 1H, ArH), 7.99 (s, 1H, ArH), 8.17 (d, *J* = 4.2 Hz, 1H, ArH), 8.33-8.34 (m, 2H, ArH), 9.05 (s, 1H, ArH), 10.12 (s, 1H, ArOH), 11.17 (s, 1H, NH) ppm; <sup>13</sup>C NMR (150 MHz, DMSO-*d*<sub>6</sub>): δ = 53.4, 59.6, 117.9, 122.4, 123.0, 123.2, 125.2, 127.2, 127.7, 128.1, 128.2, 128.8, 128.8, 129.2, 130.3, 130.5, 131.2, 131.5, 131.5, 133.2, 133.6, 136.6, 137.4, 149.4, 152.5, 153.4, 156.3, 158.6,

162.3, 162.4, 170.8 ppm. HRMS (TOF ES<sup>+</sup>): *m/z* calcd for C<sub>31</sub>H<sub>23</sub>ClN<sub>5</sub>O<sub>2</sub> [(M+H)<sup>+</sup>], 532.1535; found, 532.1539.

**4'-(5-Bromo-2-hydroxyphenyl)-2,2'-diphenyl-5-(pyridin-2-yl)-4,5-dihydro-[4,5'-bipyrimidin]-6(1H)-one (4c)**

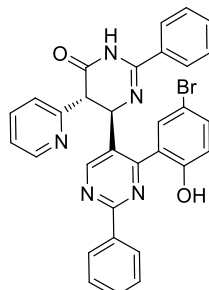

White solid (78%, 225mg); Mp: 248.0-249.2 °C; IR (KBr): 3774, 3416, 2350, 1709, 1606, 1432, 1106, 695, 619, 557, 513 cm<sup>-1</sup>; <sup>1</sup>H NMR (600 MHz, DMSO-*d*<sub>6</sub>): δ = 4.26 (d, *J* = 12.7 Hz, 1H, CH), 5.35 (d, *J* = 12.7 Hz, 1H, CH), 6.66 (s, 1H, ArH), 6.88 (t, *J* = 8.6 Hz, 2H, ArH), 7.18 (t, *J* = 5.4 Hz, 1H, ArH), 7.43-7.44 (m, 1H, ArH), 7.49-7.56 (m, 7H, ArH), 7.97 (d, *J* = 7.5 Hz, 1H, ArH), 8.00 (s, 1H, ArH), 8.18 (d, *J* = 3.9 Hz, 1H, ArH), 8.34 (d, *J* = 4.3 Hz, 2H, ArH), 9.06 (s, 1H, ArH), 10.15 (s, 1H, ArOH) ppm, 11.18 (s, 1H, NH); <sup>13</sup>C NMR (150 MHz, DMSO-*d*<sub>6</sub>): δ = 53.4, 59.6, 110.6, 118.4, 122.4, 125.2, 127.8, 127.8, 127.8, 128.1, 128.2, 128.8, 128.8, 129.1, 129.1, 131.2, 131.5, 133.2, 133.2, 133.3, 133.6, 136.6, 137.4, 149.5, 152.5, 153.8, 156.2, 158.6, 162.3, 162.4, 170.9 ppm. HRMS (TOF ES<sup>+</sup>): *m/z* calcd for C<sub>31</sub>H<sub>23</sub>BrN<sub>5</sub>O<sub>2</sub> [(M+H)<sup>+</sup>], 576.1030; found, 576.1033.

**4'-(3,5-Dichloro-2-hydroxyphenyl)-2,2'-diphenyl-5-(pyridin-2-yl)-4,5-dihydro-[4,5'-bipyrimidin]-6(1H)-one (4d)**

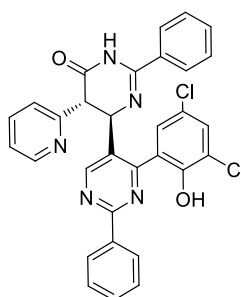

White solid (77%, 218 mg); Mp: 233.1-234.2 °C; IR (KBr): 3786, 3413, 2251, 1703, 1656, 1412, 1007, 895, 766, 654, 606 cm<sup>-1</sup>; <sup>1</sup>H NMR (600 MHz, DMSO-*d*<sub>6</sub>): δ = 4.32 (d, *J* = 13.1 Hz, 1H, CH), 5.33 (d, *J* = 12.8 Hz, 1H, CH), 6.60 (s, 1H, ArH), 6.99 (d, *J* = 7.6 Hz, 1H, ArH), 7.19 (t, *J* = 5.3 Hz, 1H, ArH), 7.50-7.52 (m, 5H, ArH), 7.55-7.59 (m, 2H, ArH), 7.61 (s, 1H, ArH), 7.97-8.01 (m, 2H, ArH), 8.23 (t, *J* = 4.5 Hz, 1H, ArH), 8.34 (d, *J* = 6.7 Hz, 2H, ArH), 9.09 (s, 1H, ArH), 11.22 (s, 1H, NH) ppm; <sup>13</sup>C NMR (150 MHz, DMSO-*d*<sub>6</sub>): δ = 53.0, 59.4, 122.6, 123.0, 123.8, 125.5, 127.8, 128.2, 128.3, 128.3, 128.8, 128.8, 128.8, 129.2, 129.2, 129.4, 130.1, 131.3, 131.5, 133.0, 133.6, 136.8, 137.2, 149.5, 149.5, 152.6, 156.1,



159.1, 161.7, 162.3, 170.8 ppm. HRMS (TOF ES<sup>+</sup>):  $m/z$  calcd for C<sub>31</sub>H<sub>22</sub>Cl<sub>2</sub>N<sub>5</sub>O<sub>2</sub> [(M+H)<sup>+</sup>], 566.1145; found, 566.1149.

**4'-(5-Chloro-2-hydroxy-4-methylphenyl)-2,2'-diphenyl-5-(pyridin-2-yl)-4,5-dihydro-[4,5'-bipyrimidin]-6(1H)-one (4e)**

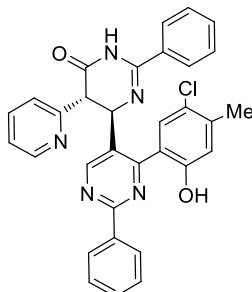

White solid (70%, 191 mg); Mp: > 300 °C; IR (KBr): 3802, 3409, 1622, 1605, 1433, 1299, 1104, 882, 700, 611, 556, 530 cm<sup>-1</sup>; <sup>1</sup>H NMR (600 MHz, DMSO-*d*<sub>6</sub>):  $\delta$  = 2.32 (s, 3H, CH<sub>3</sub>), 4.24 (d,  $J$  = 12.6 Hz, 1H, CH), 5.37 (d,  $J$  = 12.7 Hz, 1H, CH), 6.53 (s, 1H, ArH), 6.85 (d,  $J$  = 5.3 Hz, 2H, ArH), 7.14 (m, 1H, ArH), 7.48-7.55 (m, 7H, ArH), 7.96 (d,  $J$  = 7.4 Hz, 2H, ArH), 8.14 (d,  $J$  = 4.4 Hz, 1H, ArH), 8.32-8.34 (m, 2H, ArH), 9.03 (s, 1H, ArH), 10.0 (s, 1H, ArOH), 11.17 (s, 1H, NH) ppm; <sup>13</sup>C NMR (150 MHz, DMSO-*d*<sub>6</sub>):  $\delta$  = 20.1, 53.4, 59.5, 118.6, 119.1, 122.4, 123.4, 125.0, 125.2, 127.7, 127.7, 128.1, 128.2, 128.8, 128.8, 129.1, 130.9, 131.2, 131.5, 133.3, 133.6, 136.6, 137.4, 137.7, 149.4, 152.5, 153.2, 156.3, 158.5, 162.2, 162.4, 170.9 ppm. HRMS (TOF ES<sup>+</sup>):  $m/z$  calcd for C<sub>32</sub>H<sub>25</sub>ClN<sub>5</sub>O<sub>2</sub> [(M+H)<sup>+</sup>], 546.1691; found, 546.1695.

**4'-(5-Bromo-2-hydroxyphenyl)-2,2'-bis(2-chlorophenyl)-5-(pyridin-2-yl)-4,5-dihydro-[4,5'-bipyrimidin]-6(1H)-one (4f)**

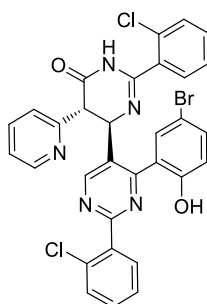

White solid (69% 222 mg); Mp: 190.0-191.1 °C; IR (KBr): 3760, 3433, 1720, 1665, 1595, 1486, 1435, 1272, 1104, 831, 750, 611, 553 cm<sup>-1</sup>; <sup>1</sup>H NMR (600 MHz, CDCl<sub>3</sub>):  $\delta$  = 4.10 (d,  $J$  = 13.3 Hz, 1H, CH), 5.92 (d,  $J$  = 13.3 Hz, 1H, CH), 6.90-6.99 (m, 2H, ArH), 7.12 (t,  $J$  = 5.0 Hz, 1H, ArH), 7.36-7.54 (m, 9H, ArH), 7.67-7.73 (m, 3H, ArH), 8.29 (d,  $J$  = 4.8 Hz, 1H, ArH), 9.09 (s, 1H, ArH), 9.99 (s, 1H, ArOH) ppm; <sup>13</sup>C NMR (150 MHz, CDCl<sub>3</sub>):  $\delta$  = 53.0, 59.4, 111.7, 120.4, 122.8, 123.3, 125.1, 127.0, 127.5, 129.9, 130.4, 130.5, 130.5, 130.9, 130.9, 131.7, 131.9, 132.1, 132.4, 132.5, 133.5, 134.7, 136.4, 136.8, 149.7, 153.3, 155.3,

159.2, 162.4, 162.9, 168.8 ppm. HRMS (TOF ES<sup>+</sup>): *m/z* calcd for C<sub>31</sub>H<sub>21</sub>BrCl<sub>2</sub>N<sub>5</sub>O<sub>2</sub> [(M+H)<sup>+</sup>], 644.0250; found, 644.0257.

**2,2'-Bis(2-chlorophenyl)-4'-(2-hydroxyphenyl)-5-(pyridin-2-yl)-4,5-dihydro-[4,5'-bipyrimidin]-6(1H)-one (4g)**

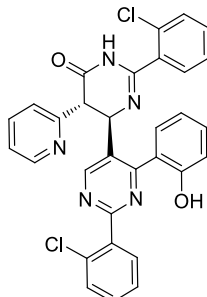

White solid (63%, 178 mg); Mp: 198.0-199.2; IR (KBr): 3802, 3425, 1700, 1638, 1577, 1433, 1405, 1202, 1004, 750, 633, 543 cm<sup>-1</sup>; <sup>1</sup>H NMR (600 MHz, DMSO-*d*<sub>6</sub>):  $\delta$  = 4.19 (d, *J* = 10.9 Hz, 1H, CH), 5.45 (d, *J* = 10.9 Hz, 1H, CH), 6.77 (t, *J* = 9.1 Hz, 2H, ArH), 6.82 (t, *J* = 7.5 Hz, 1H, ArH), 6.94 (d, *J* = 8.1 Hz, 1H, ArH), 7.15-7.17 (m, 1H, ArH), 7.28-7.30 (m, 1H, ArH), 7.49-7.43 (m, 3H, ArH), 7.51-7.61 (m, 5H, ArH), 7.70-7.72 (m, 1H, ArH), 8.18 (t, *J* = 4.0 Hz, 1H, ArH), 9.07 (s, 1H, ArH), 9.81 (s, 1H, ArOH), 11.15 (s, 1H, NH) ppm; <sup>13</sup>C NMR (150 MHz, DMSO-*d*<sub>6</sub>):  $\delta$  = 53.2, 59.8, 116.3, 119.5, 122.6, 124.7, 127.6, 127.6, 127.7, 130.1, 130.2, 130.5, 130.6, 130.9, 131.1, 131.4, 131.8, 131.9, 132.0, 132.2, 134.6, 136.7, 137.9, 149.6, 152.7, 154.4, 156.3, 157.4, 163.3, 163.9, 169.8 ppm. HRMS (TOF ES<sup>+</sup>): *m/z* calcd for C<sub>31</sub>H<sub>22</sub>Cl<sub>2</sub>N<sub>5</sub>O<sub>2</sub> [(M+H)<sup>+</sup>], 566.1145; found, 566.1143.

**4'-(5-Chloro-2-hydroxy-4-methylphenyl)-2,2'-bis(2-chlorophenyl)-5-(pyridin-2-yl)-4,5-dihydro-[4,5'-bipyrimidin]-6(1H)-one (4h)**

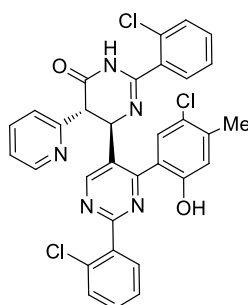

White solid (65%, 200 mg); Mp: 221.4-222.7 °C; IR (KBr): 3759, 3409, 1701, 1655, 1600, 1471, 1436, 1222, 1107, 748, 599, 530 cm<sup>-1</sup>; <sup>1</sup>H NMR (600 MHz, DMSO-*d*<sub>6</sub>):  $\delta$  = 2.32 (s, 3H, CH<sub>3</sub>), 4.22 (d, *J* = 12.5 Hz, 1H, CH), 5.43 (d, *J* = 12.7 Hz, 1H, CH), 6.46 (s, 1H, ArH), 6.86 (t, *J* = 7.8 Hz, 1H, ArH), 7.16-7.18 (m, 1H, ArH), 7.43-7.50 (m, 4H, ArH), 7.51-7.61 (m, 5H, ArH), 7.70 (d, *J* = 7.6 Hz, 1H, ArH), 8.12 (s, 1H, ArH), 9.11 (s, 1H, ArH), 10.00 (s, 1H, ArOH), 11.12 (s, 1H, NH) ppm; <sup>13</sup>C NMR (150 MHz, DMSO-*d*<sub>6</sub>):  $\delta$  = 20.1, 53.7, 60.0, 118.5, 122.4,

123.4, 124.4, 125.3, 127.6, 127.7, 130.1, 130.6, 131.0, 131.2, 131.8, 131.8, 131.9, 131.9, 132.1, 133.1, 134.6, 136.5, 137.8, 137.9, 149.4, 152.6 153.1, 156.1, 158.1, 161.9, 163.3, 170.0 ppm. HRMS (TOF ES<sup>+</sup>): *m/z* calcd for C<sub>32</sub>H<sub>23</sub>Cl<sub>3</sub>N<sub>5</sub>O<sub>2</sub> [(M+H)<sup>+</sup>], 614.0912; found, 614.0913.

**2,2'-Bis(4-fluorophenyl)-4'-(2-hydroxy-5-nitrophenyl)-5-(pyridin-2-yl)-4,5-dihydro-[4,5'-bipyrimidin]-6(1H)-one (4i)**

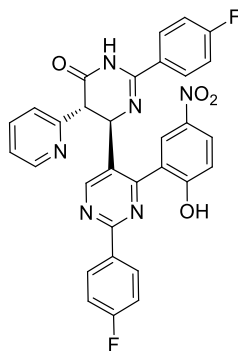

White solid (73%, 211 mg); Mp: > 300 °C; IR (KBr): 3766, 3396, 2277, 1606, 1505, 1385, 1122, 1048, 755, 605, 550 cm<sup>-1</sup>; <sup>1</sup>H NMR (600 MHz, DMSO-*d*<sub>6</sub>): δ = 4.29 (d, *J* = 13.3 Hz, 1H, CH), 5.32 (d, *J* = 13.3 Hz, 1H, CH), 6.93 (d, *J* = 7.6 Hz, 1H, ArH), 7.02-7.04 (m, 1H, ArH), 7.09 (d, *J* = 9.1 Hz, 1H, ArH), 7.31-7.40 (m, 5H, ArH), 7.50-7.52 (m, 1H, ArH), 8.02-8.06 (m, 3H, ArH), 8.17-8.22 (m, 1H, ArH), 8.37-8.39 (m, 2H, ArH), 9.13 (s, 1H, ArH), 11.25 (s, 1H, ArOH) ppm; <sup>13</sup>C NMR (150 MHz, DMSO-*d*<sub>6</sub>): δ = 53.4, 59.5, 115.7, 115.8, 116.1, 116.2, 116.8, 122.4, 125.6, 126.0, 126.9, 127.4, 130.0, 130.3, 130.5, 130.6, 133.5, 133.7, 136.6, 139.0, 149.2, 151.7, 156.1, 159.3, 160.9, 161.4, 161.5, 163.6, 164.2 (d, *J*<sub>I</sub> = 246 Hz), 165.3, 170.9 ppm; <sup>19</sup>F NMR (564 MHz, DMSO-*d*<sub>6</sub>): δ = -110.28, -109.60 ppm. HRMS (TOF ES<sup>+</sup>): *m/z* calcd for C<sub>31</sub>H<sub>20</sub>F<sub>2</sub>N<sub>6</sub>O<sub>4</sub> [(M+H)<sup>+</sup>], 579.1587; found, 579.1587.

**2,2'-Di-tert-butyl-4'-(5-fluoro-2-hydroxyphenyl)-5-(pyridin-2-yl)-4,5-dihydro-[4,5'-bipyrimidin]-6(1H)-one (4j)**

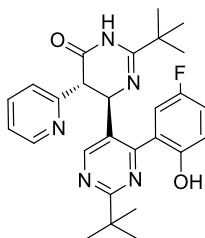

White solid (74%, 176 mg); Mp: 138.5-139.5 °C; IR (KBr): 3761, 3420, 2966, 1707, 1658, 1575, 1483, 1441, 1361, 1273, 1140, 867, 833, 769, 711, 607 cm<sup>-1</sup>; <sup>1</sup>H NMR (600 MHz, CDCl<sub>3</sub>): δ = 1.32 (s, 9H, C(CH<sub>3</sub>)<sub>3</sub>), 1.38 (s, 9H, C(CH<sub>3</sub>)<sub>3</sub>), 3.82 (d, *J* = 12.8 Hz, 1H, CH), 5.61 (d, *J* = 12.4 Hz, 1H, CH), 6.77 (d, *J* = 7.4 Hz, 1H, ArH), 6.95-6.97 (m, 1H, ArH), 7.04-7.07 (m, 2H, ArH), 7.44-7.46 (m, 1H,

ArH), 7.55 (d,  $J = 9.1$  Hz, 1H, ArH), 8.30 (s, 1H, ArH), 8.43 (s, 1H, ArOH), 8.81 (s, 1H, ArH), 10.90 (s, 1H, NH) ppm;  $^{13}\text{C}$  NMR (150 MHz,  $\text{CDCl}_3$ ):  $\delta = 27.5$ , 27.5, 27.5, 29.3, 29.3, 29.3, 37.1, 39.1, 52.6, 59.0, 117.4 (d,  $J_2 = 25.5$  Hz), 118.6 (d,  $J_2 = 22.5$  Hz), 119.3 (d,  $J_3 = 7.5$  Hz), 121.3, 122.5, 124.5, 128.5, 136.4, 149.8, 153.3, 154.2, 154.0, 156.5, 159.6, 161.2 (d,  $J_1 = 228.0$  Hz), 170.3, 174.5 ppm;  $^{19}\text{F}$  NMR (564 MHz,  $\text{CDCl}_3$ ):  $\delta = -124.09$  ppm. HRMS (TOF  $\text{ES}^+$ ):  $m/z$  calcd for  $\text{C}_{27}\text{H}_{31}\text{FN}_5\text{O}_2$  [(M+H) $^+$ ], 476.2456; found, 476.2460.

**2,2'-Di-tert-butyl-4'-(3,5-dichloro-2-hydroxyphenyl)-5-(pyridin-2-yl)-4,5-dihydro-[4,5'-bipyrimidin]-6(1H)-one (4k)**

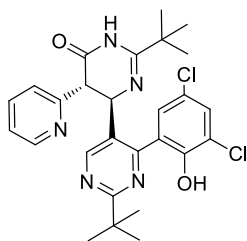

White solid (75%, 197 mg); Mp:  $>300$  °C; IR (KBr): 3766, 3398, 2974, 1710, 1652, 1591, 1441, 1364, 1142, 752, 646, 618, 572, 529  $\text{cm}^{-1}$ ;  $^1\text{H}$  NMR (600 MHz,  $\text{CDCl}_3$ ):  $\delta = 1.17$ -1.27 (m, 9H,  $\text{C}(\text{CH}_3)_3$ ), 1.28-1.36 (m, 9H,  $\text{C}(\text{CH}_3)_3$ ), 3.76 (d,  $J = 12.8$  Hz, 1H, CH), 5.44 (d,  $J = 12.8$  Hz, 1H, CH), 6.74 (d,  $J = 7.7$  Hz, 1H, ArH), 6.98-7.00 (m, 1H, ArH), 7.36 (d,  $J = 2.5$  Hz, 1H, ArH), 7.41 (d,  $J = 1.6$  Hz, 1H, ArH), 7.59 (d,  $J = 2.3$  Hz, 1H, ArH), 8.21 (d,  $J = 4.3$  Hz, 1H, ArH), 8.75 (s, 1H, ArH), 11.67 (s, 1H, NH) ppm;  $^{13}\text{C}$  NMR (150 MHz,  $\text{CDCl}_3$ ):  $\delta = 27.6$ , 27.6, 27.6, 29.3, 29.3, 29.4, 37.1, 39.1, 52.6, 58.8, 122.6, 124.0, 124.0, 124.5, 128.7, 129.4, 129.4, 131.5, 131.5, 136.6, 149.7, 151.9, 153.9, 159.4, 161.2, 169.9, 174.7 ppm. HRMS (TOF  $\text{ES}^+$ ):  $m/z$  calcd for  $\text{C}_{27}\text{H}_{30}\text{Cl}_2\text{N}_5\text{O}_2$  [(M+H) $^+$ ], 526.1771; found, 526.1776.

**5-(6-Ethylpyridin-2-yl)-4'-(2-hydroxy-5-nitrophenyl)-2,2'-diphenyl-4,5-dihydro-[4,5'-bipyrimidin]-6(1H)-one (4l)**

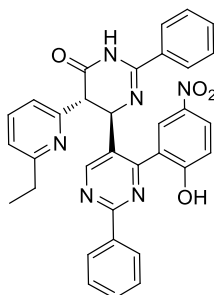

White solid (80%, 228 mg); Mp: 206.4-207.7 °C; IR (KBr): 3760, 3415, 1606, 1425, 1345, 1107, 765, 703, 656, 612, 549, 519, 509  $\text{cm}^{-1}$ ;  $^1\text{H}$  NMR (600 MHz,  $\text{DMSO}-d_6$ ):  $\delta = 1.11$  (t,  $J = 7.6$  Hz, 3H,  $\text{CH}_3$ ), 2.46 (m, 2H,  $\text{CH}_2$ ), 4.26 (d,  $J = 13.3$  Hz, 1H, CH), 5.35 (d,  $J = 13.4$  Hz, 1H, CH), 6.84 (d,  $J = 7.9$  Hz, 1H, ArH), 7.11 (d,

$J = 9.1$  Hz, 1H, ArH), 7.35 (d,  $J = 6.5$  Hz, 1H, ArH), 7.45-7.57 (m, 7H, ArH), 7.92 (s, 1H, ArH), 7.97 (d,  $J = 7.6$  Hz, 2H, ArH), 8.24 (d,  $J = 12.8$  Hz, 1H, ArH), 8.34 (d,  $J = 5.6$  Hz, 2H, ArH), 9.15 (s, 1H, ArH), 11.19 (s, 1H, NH) ppm;  $^{13}\text{C}$  NMR (150 MHz, DMSO- $d_6$ ):  $\delta = 15.2, 25.2, 53.0, 59.5, 116.8, 125.0, 126.8, 127.4, 127.7, 128.1, 128.1, 128.8, 128.8, 129.2, 129.2, 131.3, 135.7, 137.2, 137.7, 139.8, 148.9, 153.4, 161.0, 162.4$  ppm. HRMS (TOF ES $^+$ ):  $m/z$  calcd for  $\text{C}_{33}\text{H}_{27}\text{N}_6\text{O}_4$  [(M+H) $^+$ ], 571.2088; found, 571.2091.

**4'-(3,5-Dichloro-2-hydroxyphenyl)-5-(pyridin-2-yl)-2,2'-di-p-tolyl-[4,5'-bipyrimidin]-6(1H)-one (5a)**

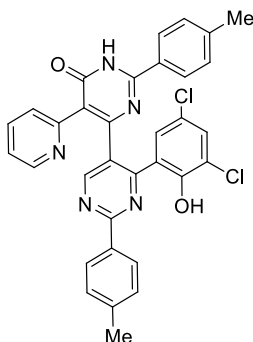

Yellow solid (81%, 240mg); Mp: 295.5-296.0 °C; IR (KBr): 3739, 3411, 2430, 1644, 1535, 1439, 1357, 1121, 730, 665, 622, 548, 513  $\text{cm}^{-1}$ ;  $^1\text{H}$  NMR (600 MHz, DMSO- $d_6$ ):  $\delta = 2.35$ -2.44 (m, 6H, CH $_3$ ), 7.06 (s, 1H, ArH), 7.23-7.28 (m, 1H, ArH), 7.33 (t,  $J = 8.9$  Hz, 4H, ArH), 7.46 (d,  $J = 7.7$  Hz, 1H, ArH), 7.54 (s, 1H, ArH), 7.74 (t,  $J = 7.7$  Hz, 1H, ArH), 7.86-8.00 (m, 2H, ArH), 8.27-8.34 (m, 3H, ArH), 8.86 (s, 1H, ArH) ppm;  $^{13}\text{C}$  NMR (150 MHz, DMSO- $d_6$ ):  $\delta = 21.5, 21.5, 122.8, 123.0, 123.7, 126.9, 128.4, 128.4, 128.4, 128.4, 128.4, 128.4, 128.4, 128.9, 129.0, 129.7, 129.7, 129.7, 129.9, 129.9, 129.9, 130.3, 130.3, 131.1, 134.2, 136.7, 141.7, 142.8, 148.7, 150.2, 151.9, 158.8, 160.9, 162.9$  ppm. HRMS (TOF ES $^+$ ):  $m/z$  calcd for  $\text{C}_{33}\text{H}_{24}\text{Cl}_2\text{N}_5\text{O}_2$  [(M+H) $^+$ ], 592.1302; found, 592.1302.

**4'-(2-Hydroxy-5-nitrophenyl)-2,2'-diphenyl-5-(pyridin-2-yl)-[4,5'-bipyrimidin]-6(1H)-one (5b)**

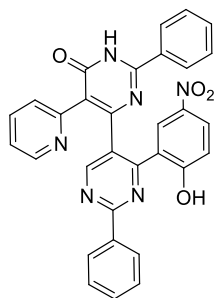

Yellow solid (86%, 233 mg); Mp:  $> 300$  °C; IR (KBr): 3788, 3430, 2370, 1650, 1595, 1404, 1349, 1194, 1104, 829, 728, 690, 607, 536  $\text{cm}^{-1}$ ;  $^1\text{H}$  NMR (600 MHz, DMSO- $d_6$ ):  $\delta = 6.93$  (d,  $J = 9.0$  Hz, 1H, ArHs), 7.08-7.11 (m, 2H, ArH), 7.42-7.44

(m, 1H, ArH), 7.54-7.57 (m, 7H, ArH), 8.10-8.12 (m, 1H, ArH), 8.18-8.31 (m, 3H, ArH), 8.43-8.45 (m, 2H, ArH), 9.10 (s, 1H, ArH), 11.50 (s, 1H, ArOH), 13.20 (s, 1H, NH) ppm;  $^{13}\text{C}$  NMR (150 MHz, DMSO- $d_6$ ):  $\delta$  = 29.9, 30.0, 30.1, 30.2, 30.4, 30.5, 30.7, 116.7, 122.5, 126.2, 126.3, 126.9, 127.0, 128.3, 128.3, 128.4, 129.1, 129.2, 129.2, 129.3, 131.6, 132.5, 135.6, 137.1, 140.4, 148.8, 152.1, 159.2, 159.8, 161.4, 163.1 ppm. HRMS (TOF ES $^+$ ):  $m/z$  calcd for  $\text{C}_{31}\text{H}_{21}\text{N}_6\text{O}_4$  [(M+H) $^+$ ], 541.1619; found, 541.1619.

**4'-(5-Fluoro-2-hydroxyphenyl)-2,2'-diphenyl-5-(pyridin-2-yl)-[4,5'-bipyrimidin]-6(1H)-one(5c)**

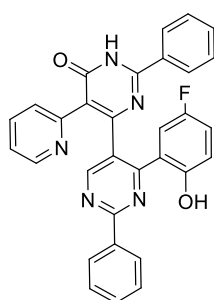

Yellow solid (82% 211 mg); Mp:  $> 300$  °C; IR (KBr): 3751, 3449, 2367, 1649, 1512, 1432, 1362, 1107, 881, 690, 603, 538  $\text{cm}^{-1}$ ;  $^1\text{H}$  NMR (600 MHz, DMSO- $d_6$ ):  $\delta$  = 6.59-6.61 (m, 1H, ArH), 6.73-6.75 (m, 1H, ArH), 7.05 (d,  $J$  = 3.2 Hz, 1H, ArH), 7.17-7.19 (m, 2H, ArH), 7.52-7.61 (m, 7H, ArH), 8.11 (d,  $J$  = 7.6 Hz, 2H, ArH), 8.27 (d,  $J$  = 3.8 Hz, 1H, ArH), 8.41-8.43 (m, 2H, ArH), 8.94 (s, 1H, ArH), 9.79 (s, 1H, ArOH), 13.16 (s, 1H, NH) ppm;  $^{13}\text{C}$  NMR (150 MHz, DMSO- $d_6$ ):  $\delta$  = 116.4, 116.5, 117.2, 117.2, 117.6, 117.7, 122.6, 126.4, 126.5, 126.5, 128.3, 128.3, 128.4, 128.4, 129.1, 129.1, 129.3, 129.3, 131.3, 131.5, 132.4, 136.1, 137.2, 148.8, 151.5, 152.4, 155.2, 156.8, 158.9, 161.2, 162.7 ppm.  $^{19}\text{F}$  NMR (564 MHz, DMSO- $d_6$ ):  $\delta$  = -125.95 ppm. HRMS (TOF ES $^+$ ):  $m/z$  calcd for  $\text{C}_{31}\text{H}_{21}\text{FN}_5\text{O}_2$  [(M+H) $^+$ ], 514.1674; found, 514.0672.

**4'-(5-Chloro-2-hydroxyphenyl)-2,2'-diphenyl-5-(pyridin-2-yl)-[4,5'-bipyrimidin]-6(1H)-one (5d)**

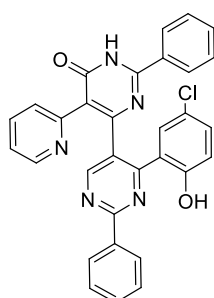

Yellow solid (83%, 220 mg); Mp:  $> 300$  °C; IR (KBr): 3765, 3452, 2344, 1645, 1590, 1401, 1385, 1121, 708, 615, 569, 513  $\text{cm}^{-1}$ ;  $^1\text{H}$  NMR (600 MHz, DMSO- $d_6$ ):

$\delta = 6.70$  (d,  $J = 2.3$  Hz, 1H, ArH),  $6.76$  (d,  $J = 8.7$  Hz, 1H, ArH),  $7.12$  (d,  $J = 7.9$  Hz, 1H, ArH),  $7.17$ - $7.19$  (m, 1H, ArH),  $7.22$ - $7.23$  (m, 1H, ArH),  $7.53$ - $7.58$  (m, 6H, ArH),  $7.61$  (d,  $J = 7.3$  Hz, 1H, ArH),  $8.13$  (d,  $J = 7.6$  Hz, 2H, ArH),  $8.26$  (d,  $J = 4.3$  Hz, 1H, ArH),  $8.41$ - $8.43$  (m, 2H, ArH),  $8.98$  (s, 1H, ArH),  $10.07$  (s, 1H, ArOH),  $13.14$  (s, 1H, NH) ppm;  $^{13}\text{C}$  NMR (150 MHz, DMSO- $d_6$ ):  $\delta = 117.8$ ,  $122.4$ ,  $123.5$ ,  $126.4$ ,  $127.3$ ,  $128.3$ ,  $128.3$ ,  $128.3$ ,  $128.4$ ,  $128.4$ ,  $128.4$ ,  $129.1$ ,  $129.1$ ,  $129.1$ ,  $129.3$ ,  $129.3$ ,  $129.3$ ,  $129.3$ ,  $129.3$ ,  $129.9$ ,  $130.7$ ,  $131.4$ ,  $131.6$ ,  $132.4$ ,  $136.1$ ,  $137.2$ ,  $148.7$ ,  $152.2$ ,  $154.0$ ,  $158.9$ ,  $160.9$ ,  $162.8$  ppm. HRMS (TOF ES $^+$ ):  $m/z$  calcd for  $\text{C}_{31}\text{H}_{21}\text{ClN}_5\text{O}_2$  [(M+H) $^+$ ], 530.1378; found, 530.1376.

**4'-(5-Bromo-2-hydroxyphenyl)-2,2'-diphenyl-5-(pyridin-2-yl)-[4,5'-bipyrimidin]-6(1H)-one (5e)**

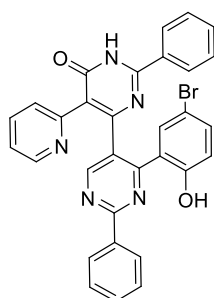

Yellow solid (80%, 230 mg); Mp:  $> 300$  °C; IR (KBr): 3454, 2366, 1642, 1586, 1400, 1387, 1116, 698, 610, 556  $\text{cm}^{-1}$ ;  $^1\text{H}$  NMR (600 MHz, DMSO- $d_6$ ):  $\delta = 6.72$  (d,  $J = 8.7$  Hz, 1H, ArH),  $6.84$  (s, 1H, ArH),  $7.13$ - $7.20$  (m, 2H, ArH),  $7.33$ - $7.37$  (m, 1H, ArH),  $7.45$ - $7.68$  (m, 7H, ArH),  $8.15$  (t,  $J = 7.6$  Hz, 2H, ArH),  $8.22$ - $8.26$  (m, 1H, ArH),  $8.32$ - $8.43$  (m, 2H, ArH),  $8.98$  (s, 1H, ArH),  $10.12$  (s, 1H, ArOH),  $13.13$  (s, 1H, NH) ppm;  $^{13}\text{C}$  NMR (150 MHz, DMSO- $d_6$ ):  $\delta = 111.1$ ,  $118.3$ ,  $122.4$ ,  $126.4$ ,  $127.8$ ,  $128.3$ ,  $128.3$ ,  $128.4$ ,  $128.4$ ,  $128.4$ ,  $129.1$ ,  $129.1$ ,  $129.1$ ,  $129.3$ ,  $129.3$ ,  $129.3$ ,  $131.4$ ,  $131.4$ ,  $131.5$ ,  $131.5$ ,  $132.3$ ,  $132.7$ ,  $133.5$ ,  $136.2$ ,  $137.2$ ,  $148.7$ ,  $152.3$ ,  $154.4$ ,  $158.9$ ,  $160.9$ ,  $162.8$  ppm. HRMS (TOF ES $^+$ ):  $m/z$  calcd for  $\text{C}_{31}\text{H}_{21}\text{BrN}_5\text{O}_2$  [(M+H) $^+$ ], 574.0873; found, 574.0875.

**4'-(2-Hydroxyphenyl)-2,2'-diphenyl-5-(pyridin-2-yl)-[4,5'-bipyrimidin]-6(1H)-one (5f)**

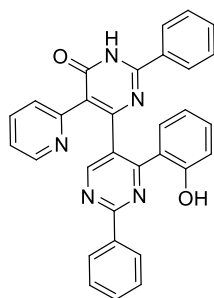

Yellow solid (80%, 198 mg); Mp:  $> 300$  °C; IR (KBr): 3446, 2363, 1644, 1509, 1428, 1359, 1107, 898, 655, 572, 542  $\text{cm}^{-1}$ ;  $^1\text{H}$  NMR (600 MHz, DMSO- $d_6$ ):  $\delta =$

6.75-6.78 (m, 2H, ArH), 7.06 (d,  $J = 7.3$  Hz, 1H, ArH), 7.16-7.23 (m, 3H, ArH), 7.49-7.61 (m, 7H, ArH), 8.01 (d,  $J = 7.6$  Hz, 2H, ArH), 8.31 (t,  $J_1 = 8.3$  Hz,  $J_2 = 4.2$  Hz, 1H, ArH), 8.41 (t,  $J_1 = 5.3$  Hz,  $J_2 = 2.5$  Hz, 2H, ArH), 8.81 (s, 1H, ArH), 9.94 (s, 1H, ArOH), 13.12 (s, 1H, NH) ppm;  $^{13}\text{C}$  NMR (150 MHz, DMSO- $d_6$ ):  $\delta = 116.3, 119.6, 122.7, 125.3, 126.5, 128.3, 128.3, 128.3, 128.4, 128.4, 128.4, 129.0, 129.0, 129.0, 129.2, 129.2, 129.2, 131.0, 131.2, 131.5, 132.3, 136.3, 137.3, 148.7, 152.6, 155.4, 156.5, 158.7, 159.3, 162.5, 162.8$  ppm. HRMS (TOF ES $^+$ ):  $m/z$  calcd for  $\text{C}_{31}\text{H}_{22}\text{N}_5\text{O}_2$  [(M+H) $^+$ ], 496.1768; found, 496.1768.

**4'-(3,5-Dichloro-2-hydroxyphenyl)-2,2'-diphenyl-5-(pyridin-2-yl)-[4,5'-bipyrimidin]-6(1H)-one (5g)**

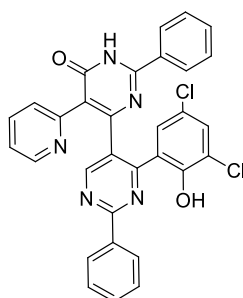

Yellow solid (83%, 234 mg); Mp:  $> 300$  °C; IR (KBr): 3837, 3422, 2967, 1749, 1593, 1434, 1390, 1194, 1104, 819, 674, 602, 572  $\text{cm}^{-1}$ ;  $^1\text{H}$  NMR (600 MHz, DMSO- $d_6$ ):  $\delta = 6.99$  (d,  $J = 2.5$  Hz, 1H, ArH), 7.23-7.25 (m, 1H, ArH), 7.42 (d,  $J = 8.0$  Hz, 1H, ArH), 7.52-7.58 (m, 6H, ArH), 7.61 (t,  $J = 7.3$  Hz, 1H, ArH), 7.71-7.74 (m, 1H, ArH), 8.06 (d,  $J = 7.5$  Hz, 2H, ArH), 8.28 (d,  $J = 4.5$  Hz, 1H, ArH), 8.39-8.41 (m, 2H, ArH), 8.84 (s, 1H, ArH), 10.54 (s, 1H, ArOH), 13.23 (s, 1H, NH) ppm;  $^{13}\text{C}$  NMR (150 MHz, DMSO- $d_6$ ):  $\delta = 122.8, 123.0, 123.8, 126.9, 128.4, 128.4, 128.4, 128.4, 128.4, 128.4, 128.4, 128.4, 128.9, 129.1, 129.1, 129.1, 129.3, 129.3, 129.3, 130.3, 131.4, 131.8, 132.6, 136.7, 136.9, 148.8, 150.1, 151.8, 158.4, 158.9, 160.8, 162.9$  ppm. HRMS (TOF ES $^+$ ):  $m/z$  calcd for  $\text{C}_{31}\text{H}_{20}\text{Cl}_2\text{N}_5\text{O}_2$  [(M+H) $^+$ ], 564.0989; found, 564.0992.

**4'-(5-Chloro-2-hydroxy-4-methylphenyl)-2,2'-diphenyl-5-(pyridin-2-yl)-[4,5'-bipyrimidin]-6(1H)-one (5h)**

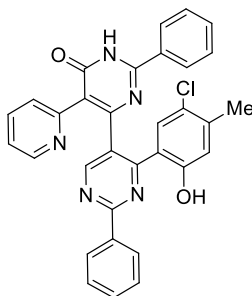



Yellow solid (82%, 223 mg); Mp: >300 °C; IR (KBr): 3785, 3403, 2374, 1641, 1532, 1434, 1385, 1106, 695, 616, 555 cm<sup>-1</sup>; <sup>1</sup>H NMR (600 MHz, DMSO-*d*<sub>6</sub>): δ = 2.26 (s, 3H, CH<sub>3</sub>), 6.70 (s, 1H, ArH), 6.72 (s, 1H, ArH), 7.11 (d, *J* = 7.9 Hz, 1H, ArH), 7.15-7.17 (m, 1H, ArH), 7.52-7.62 (m, 7H, ArH), 8.12 (d, *J* = 7.4 Hz, 2H, ArH), 8.24 (d, *J* = 4.1 Hz, 1H, ArH), 8.40-8.42 (m, 2H, ArH), 8.95 (s, 1H, ArH), 9.97 (s, 1H, ArOH), 13.15 (s, 1H, NH) ppm; <sup>13</sup>C NMR (150 MHz, DMSO-*d*<sub>6</sub>): δ = 20.0, 118.4, 122.4, 124.0, 124.9, 126.5, 128.3, 128.3, 128.3, 128.4, 128.4, 128.4, 128.4, 129.1, 129.1, 129.1, 129.3, 129.3, 129.3, 130.3, 131.2, 131.5, 132.4, 136.0, 137.2, 138.5, 148.7, 152.3, 153.9, 158.9, 160.9, 162.8 ppm. HRMS (TOF ES<sup>+</sup>): *m/z* calcd for C<sub>32</sub>H<sub>23</sub>ClN<sub>5</sub>O<sub>2</sub> [(M+H)<sup>+</sup>], 544.1535; found, 544.1538.

**2,2'-Bis(2-chlorophenyl)-4'-(2-hydroxyphenyl)-5-(pyridin-2-yl)-[4,5'-bipyrimidin]-6(1H)-one (5i)**

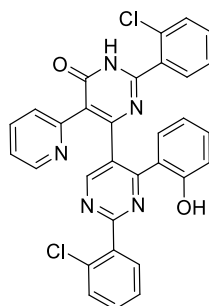

Yellow solid (77%, 217 mg); Mp: 240.7–241.8 °C; IR (KBr): 3759, 3402, 2366, 2022, 1605, 1516, 1488, 1387, 1123, 764, 681, 616, 557, 535 cm<sup>-1</sup>; <sup>1</sup>H NMR (600 MHz, DMSO-*d*<sub>6</sub>): δ = 6.0 (t, *J* = 7.4 Hz, 1H, ArH), 6.82 (d, *J* = 8.2 Hz, 1H, ArH), 6.99 (d, *J* = 7.4 Hz, 1H, ArH), 7.19 (t, *J* = 3.7 Hz, 2H, ArH), 7.23-7.26 (m, 1H, ArH), 7.48-7.63 (m, 8H, ArH), 7.77-7.79 (m, 1H, ArH), 8.27 (s, 1H, ArH), 8.56 (s, 1H, ArH), 10.04 (s, 1H, ArOH), 13.27 (s, 1H, NH) ppm; <sup>13</sup>C NMR (150 MHz, DMSO-*d*<sub>6</sub>): δ = 116.5, 119.7, 122.8, 124.2, 126.5, 127.6, 127.7, 127.7, 130.3, 130.7, 130.7, 130.7, 131.3, 131.4, 131.6, 131.6, 132.0, 132.0, 132.1, 132.2, 132.5, 133.4, 136.2, 137.6, 148.6, 152.1, 155.7, 158.3, 159.0, 161.9, 163.5 ppm. HRMS (TOF ES<sup>+</sup>): *m/z* calcd for C<sub>31</sub>H<sub>20</sub>Cl<sub>2</sub>N<sub>5</sub>O<sub>2</sub> [(M+H)<sup>+</sup>], 564.0989; found, 564.0991.

**4'-(5-Chloro-2-hydroxy-4-methylphenyl)-2,2'-bis(2-chlorophenyl)-5-(pyridin-2-yl)-[4,5'-bipyrimidin]-6(1H)-one (5j)**

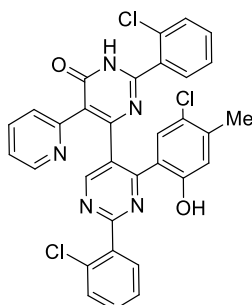

Yellow solid (80%, 244 mg); Mp: >300 °C; IR (KBr): 3737, 3426, 1695, 1605, 1500, 1385, 1107, 764, 726, 692, 664, 602, 573 cm<sup>-1</sup>; <sup>1</sup>H NMR (600 MHz, DMSO-*d*<sub>6</sub>): δ = 2.27 (s, 3H, CH<sub>3</sub>), 6.68 (s, 1H, ArH), 6.77 (s, 1H, ArH), 7.11 (d, *J* = 7.9 Hz, 1H, ArH), 7.20 (s, 1H, ArH), 7.49-7.66 (m, 8H, ArH), 7.79 (d, *J* = 7.3 Hz, 1H, ArH), 8.22 (s, 1H, ArH), 8.96 (s, 1H, ArH), 10.11 (s, 1H, ArOH), 13.31 (s, 1H, NH) ppm; <sup>13</sup>C NMR (150 MHz, DMSO-*d*<sub>6</sub>): δ = 20.1, 118.6, 122.5, 123.8, 124.0, 126.5, 127.6, 127.8, 127.8, 130.4, 130.4, 130.6, 130.7, 130.7, 131.5, 131.6, 132.1, 132.1, 132.1, 132.1, 132.5, 133.4, 136.0, 137.6, 138.9, 148.6, 151.8, 154.1, 158.5, 158.7, 160.1, 163.7 ppm. HRMS (TOF ES<sup>+</sup>): *m/z* calcd for C<sub>32</sub>H<sub>21</sub>Cl<sub>3</sub>N<sub>5</sub>O<sub>2</sub> [(M+H)<sup>+</sup>], 612.0755; found, 612.0753.

**2,2'-Bis(4-fluorophenyl)-4'-(2-hydroxyphenyl)-5-(pyridin-2-yl)-[4,5'-bipyrimidin]-6(1*H*)-one (5k)**

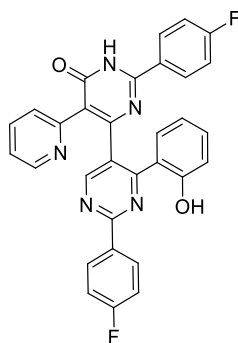

Yellow solid (82%, 218 mg); Mp: 304.3-305.5 °C; IR (KBr): 3759, 3393, 1643, 1606, 1519, 1439, 1384, 1106, 852, 700, 617, 554 cm<sup>-1</sup>; <sup>1</sup>H NMR (600 MHz, DMSO-*d*<sub>6</sub>): δ = 6.74-6.77 (m, 2H, ArH), 7.03 (d, *J* = 7.3 Hz, 1H, ArH), 7.16-7.22 (m, 3H, ArH), 7.33-7.37 (m, 4H, ArH), 7.57-7.60 (m, 1H, ArH), 8.07-8.09 (m, 2H, ArH), 8.31 (d, *J* = 4.1 Hz, 1H, ArH), 8.44-8.46 (m, 2H, ArH), 8.79 (s, 1H, ArH), 9.87 (s, 1H, ArOH), 13.13 (s, 1H, NH) ppm; <sup>13</sup>C NMR (150 MHz, DMSO-*d*<sub>6</sub>): δ = 116.0, 116.1, 116.1, 116.2, 116.3, 119.7, 122.7, 125.4, 126.5, 129.3, 130.7, 130.8, 130.9, 131.0, 131.0, 131.1, 131.2, 133.8, 136.3, 148.7, 152.6, 155.3, 158.7, 159.3, 161.7, 162.9, 163.1, 163.7, 163.9, 165.4, 165.6 ppm; <sup>19</sup>F NMR (564 MHz, DMSO-*d*<sub>6</sub>): δ = -110.06, -108.21 ppm. HRMS (TOF ES<sup>+</sup>): *m/z* calcd for C<sub>31</sub>H<sub>20</sub>F<sub>2</sub>N<sub>5</sub>O<sub>2</sub> [(M+H)<sup>+</sup>], 532.1580; found, 532.1576

**4'-(5-Fluoro-2-hydroxyphenyl)-2,2'-bis(3-fluorophenyl)-5-(pyridin-2-yl)-[4,5'-bipyrimidin]-6(1*H*)-one (5l)**

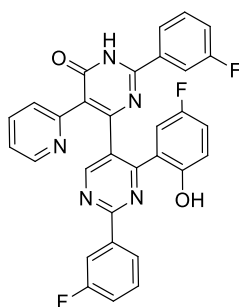

Yellow solid (79%, 217 mg); Mp: 222.6–223.2 °C; IR (KBr): 3766, 3429, 1650, 1532, 1327, 1131, 711, 608, 559, 502  $\text{cm}^{-1}$ ;  $^1\text{H}$  NMR (600 MHz,  $\text{DMSO-}d_6$ ):  $\delta$  = 6.56-6.57 (m, 1H, ArH), 6.65-6.67 (m, 1H, ArH), 6.97-6.99 (m, 1H, ArH), 7.10-7.13 (m, 2H, ArH), 7.32-7.40 (m, 2H, ArH), 7.50-7.57 (m, 3H, ArH), 7.79 (d,  $J$  = 10.1 Hz, 2H, ArH), 8.30 (d,  $J$  = 3.8 Hz, 1H, ArH), 8.61 (d,  $J$  = 8.2 Hz, 2H, ArH), 8.88 (s, 1H, ArH), 9.69 (s, 1H, ArOH), 13.12 (s, 1H, NH) ppm;  $^{13}\text{C}$  NMR (150 MHz,  $\text{DMSO-}d_6$ ):  $\delta$  = 114.7 (d,  $J_2$  = 24.0 Hz), 115.0, 115.1, 116.5 (d,  $J_2$  = 22.5 Hz), 117.2, 117.2, 117.8 (d,  $J_2$  = 24.0 Hz), 118.4 (d,  $J_2$  = 21.0 Hz), 119.1, 119.2, 122.7, 124.4, 126.4 (d,  $J_2$  = 22.5 Hz), 126.4, 131.2, 131.3 (d,  $J_2$  = 22.5 Hz), 131.4, 131.6, 136.2, 139.7 (d,  $J_3$  = 7.5 Hz), 148.8, 151.4, 152.2, 155.3, 156.8, 159.0, 161.4, 161.6, 161.8, 163.0 (d,  $J_1$  = 241.5 Hz), 163.4 ppm;  $^{19}\text{F}$  NMR (564 MHz,  $\text{DMSO-}d_6$ ):  $\delta$  = -125.83, -112.73, -112.34 ppm. HRMS (TOF  $\text{ES}^+$ ):  $m/z$  calcd for  $\text{C}_{31}\text{H}_{19}\text{F}_3\text{N}_5\text{O}_2$   $[(\text{M}+\text{H})^+]$ , 550.1485; found, 550.1487.

**2,2'-Bis(3-fluorophenyl)-4'-(2-hydroxyphenyl)-5-(pyridin-2-yl)-[4,5'-bipyrimidin]-6(1H)-one (5m)**

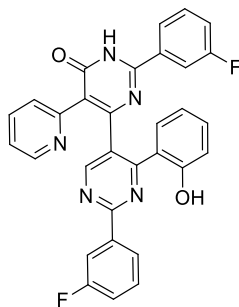

Yellow solid (75%, 199 mg); Mp: > 300 °C; IR (KBr): 3420, 3078, 1647, 1560, 1433, 1365, 1205, 1150, 1010, 896, 760, 615, 525  $\text{cm}^{-1}$ ;  $^1\text{H}$  NMR (600 MHz,  $\text{DMSO-}d_6$ ):  $\delta$  = 6.78 (t,  $J$  = 5.3 Hz, 2H, ArH), 7.07 (d,  $J$  = 7.0 Hz, 1H, ArH), 7.18-7.23 (m, 3H, ArH), 7.38-7.44 (m, 2H, ArH), 7.53-7.62 (m, 3H, ArH), 7.76 (d,  $J$  = 10.1 Hz, 1H, ArH), 7.89 (d,  $J$  = 7.8 Hz, 1H, ArH), 8.10 (d,  $J$  = 9.7 Hz, 1H, ArH), 8.25 (d,  $J$  = 7.9 Hz, 1H, ArH), 8.33 (d,  $J$  = 4.2 Hz, 1H, ArH), 8.82 (d,  $J$  = 13.5 Hz, 1H, ArH), 9.86 (s, 1H, ArOH), 13.16 (s, 1H, NH) ppm;  $^{13}\text{C}$  NMR (150 MHz,  $\text{DMSO-}d_6$ ):  $\delta$  = 114.6 (d,  $J_2$  = 22.5 Hz), 115.1 (d,  $J_2$  = 22.5 Hz), 116.2, 118.2, 118.4, 119.0, 119.1, 119.7, 122.8, 124.4, 124.5, 125.4, 126.5, 131.0, 131.1, 131.1, 131.1, 131.3, 131.4, 135.4, 136.4, 139.8, 139.9, 148.8, 152.5, 155.3, 158.7,

162.2, 162.2 (d,  $J_1 = 247.5$  Hz), 162.5 (d,  $J_1 = 241.5$  Hz), 163.8 ppm;  $^{19}\text{F}$  NMR (564 MHz,  $\text{DMSO-}d_6$ ):  $\delta = -112.76, -112.43$  ppm. HRMS (TOF  $\text{ES}^+$ ):  $m/z$  calcd for  $\text{C}_{31}\text{H}_{20}\text{F}_2\text{N}_5\text{O}_2$   $[(\text{M}+\text{H})^+]$ , 532.1580; found, 532.1578.

**4'-(5-Chloro-2-hydroxy-4-methylphenyl)-2,2'-bis(3-fluorophenyl)-5-(pyridin-2-yl)-[4,5'-bipyrimidin]-6(1H)-one (5n)**

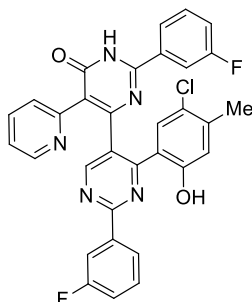

Yellow solid (79%, 229 mg); Mp:  $> 300$  °C; IR (KBr): 3422, 2425, 1749, 1594, 1515, 1311, 1270, 1141, 1123, 1056, 856, 788, 619, 555  $\text{cm}^{-1}$ ;  $^1\text{H}$  NMR (600 MHz,  $\text{DMSO-}d_6$ ):  $\delta = 2.26$  (s, 3H,  $\text{CH}_3$ ), 6.69 (s, 1H, ArH), 6.74 (s, 1H, ArH), 7.11 (d,  $J = 7.9$  Hz, 1H, ArH), 7.18-7.20 (m, 1H, ArH), 7.39-7.48 (m, 2H, ArH), 7.56-7.62 (m, 3H, ArH), 7.86 (d,  $J = 10.1$  Hz, 1H, ArH), 8.00 (t,  $J = 7.7$  Hz, 1H, ArH), 8.11 (d,  $J = 10.3$  Hz, 1H, ArH), 8.26 (t,  $J = 5.2$  Hz, 2H, ArH), 8.96 (s, 1H, ArH), 9.94 (s, 1H, ArOH), 13.21 (s, 1H, NH) ppm;  $^{13}\text{C}$  NMR (150 MHz,  $\text{DMSO-}d_6$ ):  $\delta = 20.0, 114.6$  (d,  $J_2 = 24.0$  Hz), 115.1 (d,  $J_2 = 24.0$  Hz), 118.3, 118.4, 118.4, 119.1, 119.2, 122.5, 124.1, 124.4, 124.5, 124.9, 126.4, 130.3, 131.2, 131.3, 131.4, 131.4, 136.2, 138.6, 139.7, 139.8, 148.8, 152.1, 153.8, 159.0, 161.1, 161.7, 162.2, 162.6 (d,  $J_1 = 243.0$  Hz), 163.8 ppm;  $^{19}\text{F}$  NMR (564 MHz,  $\text{DMSO-}d_6$ ):  $\delta = -112.71, -112.32$  ppm. HRMS (TOF  $\text{ES}^+$ ):  $m/z$  calcd for  $\text{C}_{32}\text{H}_{21}\text{ClF}_2\text{N}_5\text{O}_2$   $[(\text{M}+\text{H})^+]$ , 580.1346; found, 580.1345.

**4'-(5-Bromo-2-hydroxyphenyl)-5-(pyridin-2-yl)-2,2'-bis(4-(trifluoromethyl)phenyl)-[4,5'-bipyrimidin]-6(1H)-one (5o)**

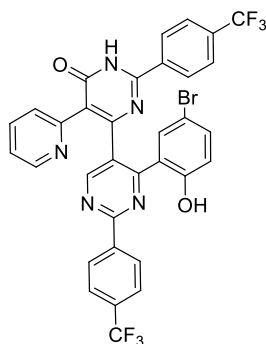

Yellow solid (86%, 305 mg); Mp: 174.8–175.4 °C; IR (KBr): 3751, 3434, 2939, 2343, 1651, 1600, 1385, 1327, 1129, 859, 675, 611, 516  $\text{cm}^{-1}$ ;  $^1\text{H}$  NMR (600 MHz,  $\text{DMSO-}d_6$ ):  $\delta = 6.70$  (d,  $J = 8.7$  Hz, 1H, ArH), 6.76 (d,  $J = 2.0$  Hz, 1H, ArH), 7.09 (d,  $J = 7.9$  Hz, 1H, ArH), 7.19-7.21 (m, 1H, ArH), 7.34-7.36 (m, 1H,

ArH), 7.57-7.60 (m, 1H, ArH), 7.92-7.94 (m, 4H, ArH), 8.25 (d,  $J = 4.4$  Hz, 1H, ArH), 8.37 (d,  $J = 8.2$  Hz, 2H, ArH), 8.62 (d,  $J = 8.2$  Hz, 2H, ArH), 9.10 (s, 1H, ArH), 10.06 (s, 1H, ArOH), 13.38 (s, 1H, NH) ppm;  $^{13}\text{C}$  NMR (150 MHz, DMSO- $d_6$ ):  $\delta = 111.1, 118.3, 121.9, 122.5, 123.5, 123.7, 125.3, 125.6, 126.0, 126.2, 126.2, 126.3, 126.3, 127.4, 127.5, 129.1, 129.1, 129.1, 129.3, 129.3, 131.2, 131.5, 132.1, 132.6, 133.7, 136.3, 140.9, 148.7, 151.9, 154.3, 159.1, 161.0, 161.6$  ppm;  $^{19}\text{F}$  NMR (564 MHz, DMSO- $d_6$ ):  $\delta = -61.39, -61.39, -61.39, -61.28, -61.28, -61.28$  ppm. HRMS (TOF ES $^+$ ):  $m/z$  calcd for  $\text{C}_{33}\text{H}_{18}\text{BrF}_6\text{N}_5\text{O}_2$  [(M+H) $^+$ ], 710.0621; found, 710.0624.

**4'-(2-Hydroxyphenyl)-5-(pyridin-2-yl)-2,2'-bis(4-(trifluoromethyl)phenyl)-[4,5'-bipyrimidin]-6(1H)-one (5p)**

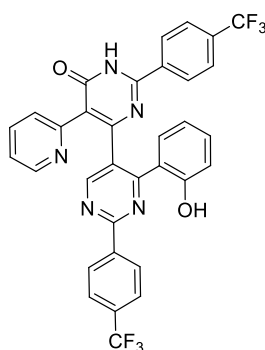

Yellow solid (84%, 265 mg); Mp: 209.3–210.9 °C; IR (KBr): 3760, 3435, 2367, 1669, 1600, 1327, 1130, 751, 665, 598, 572  $\text{cm}^{-1}$ ;  $^1\text{H}$  NMR (600 MHz, DMSO- $d_6$ ):  $\delta = 6.76$  (t,  $J = 7.9$  Hz, 2H, ArH), 7.00 (d,  $J = 7.4$  Hz, 1H, ArH), 7.18-7.23 (m, 3H, ArH), 7.59 (t,  $J = 7.0$  Hz, 1H, ArH), 7.88-7.91 (m, 4H, ArH), 8.23 (d,  $J = 8.0$  Hz, 2H, ArH), 8.30 (d,  $J = 3.8$  Hz, 1H, ArH), 8.61 (d,  $J = 8.2$  Hz, 2H, ArH), 8.91 (s, 1H, ArH), 9.82 (s, 1H, ArOH), 13.31 (s, 1H, NH) ppm;  $^{13}\text{C}$  NMR (150 MHz, DMSO- $d_6$ ):  $\delta = 116.2, 119.8, 122.8, 123.5, 123.7, 125.3, 125.3, 125.5, 125.9, 126.2, 126.2, 126.4, 129.0, 129.0, 129.0, 129.3, 129.3, 129.3, 131.0, 131.2, 131.4, 131.7, 131.8, 132.0, 136.4, 137.0, 141.0, 148.7, 152.3, 155.2, 158.8, 161.3, 163.0$  ppm.  $^{19}\text{F}$  NMR (564 MHz, DMSO- $d_6$ ):  $\delta = -61.40, -61.40, -61.40, -61.28, -61.28, -61.28$  ppm. HRMS (TOF ES $^+$ ):  $m/z$  calcd for  $\text{C}_{33}\text{H}_{20}\text{F}_6\text{N}_5\text{O}_2$  [(M+H) $^+$ ], 632.1516; found, 632.1514.

**4'-(5-Chloro-2-hydroxyphenyl)-2,2'-dicyclopropyl-5-(pyridin-2-yl)-[4,5'-bipyrimidin]-6(1H)-one (5q)**

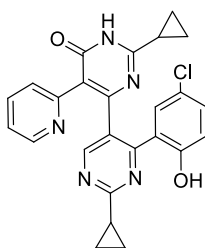

Yellow solid (86%, 197 mg); Mp: 216.3–217.9 °C; IR (KBr): 3808, 3406, 2370, 1632, 1604, 1470, 1387, 1114, 714, 683, 614, 571, 523 cm<sup>-1</sup>; <sup>1</sup>H NMR (600 MHz, DMSO-*d*<sub>6</sub>): δ = 0.82 (s, 2H, CH<sub>2</sub>), 0.96-1.05 (m, 6H, CH<sub>2</sub>), 1.91 (t, *J* = 4.0 Hz, 1H, CH), 2.17-2.20 (m, 1H, CH), 6.71 (s, 1H, ArH), 6.74 (d, *J* = 8.7 Hz, 1H, ArH), 7.13-7.21 (m, 3H, ArH), 7.57 (t, *J* = 7.5 Hz, 1H, ArH), 8.26 (d, *J* = 3.6 Hz, 1H, ArH), 8.38 (s, 1H, ArH), 10.07 (s, 1H, ArOH), 12.98 (s, 1H, NH) ppm; <sup>13</sup>C NMR (150 MHz, DMSO-*d*<sub>6</sub>): δ = 10.3, 10.3, 11.1, 11.1, 13.7, 18.3, 117.9, 121.4, 122.3, 123.0, 126.5, 127.0, 129.8, 130.1, 130.4, 136.1, 148.6, 152.7, 154.1, 158.0, 159.1, 160.6, 161.9, 163.5, 170.4 ppm. HRMS (TOF ES<sup>+</sup>): *m/z* calcd for C<sub>25</sub>H<sub>21</sub>ClN<sub>5</sub>O<sub>2</sub> [(M+H)<sup>+</sup>], 458.1378; found, 458.1380.

**2,2'-Dicyclopropyl-4'-(2-hydroxyphenyl)-5-(pyridin-2-yl)-[4,5'-bipyrimidin]-6(1*H*)-one (5r)**

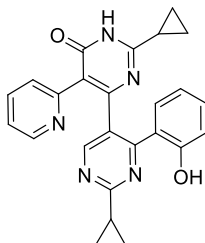

Yellow solid (85%, 180 mg); Mp: 240.7-241.7 °C; IR (KBr): 3858, 3452, 2366, 1642, 1501, 1489, 1376, 1119, 625, 547 cm<sup>-1</sup>; <sup>1</sup>H NMR (600 MHz, DMSO-*d*<sub>6</sub>): δ = 0.65 (s, 2H, CH<sub>2</sub>), 0.86-0.88 (m, 2H, CH<sub>2</sub>), 0.97-1.05 (m, 4H, CH<sub>2</sub>), 1.83-1.87 (m, 1H, CH), 2.15-2.20 (m, 1H, CH), 6.73-6.77 (m, 2H, ArH), 7.06 (d, *J* = 7.4 Hz, 1H, ArH), 7.14-7.22 (m, 2H, ArH), 7.29 (d, *J* = 7.9 Hz, 1H, ArH), 7.62 (t, *J* = 7.5 Hz, 1H, ArH), 8.22 (s, 1H, ArH), 8.30 (d, *J* = 4.3 Hz, 1H, ArH), 10.12 (s, 1H, ArOH), 12.98 (s, 1H, NH) ppm; <sup>13</sup>C NMR (150 MHz, DMSO-*d*<sub>6</sub>): δ = 10.3, 10.3, 11.0, 11.0, 13.6, 18.2, 116.5, 119.3, 121.6, 122.6, 124.7, 126.6, 129.6, 130.9, 131.0, 136.3, 148.7, 153.0, 155.6, 157.8, 159.5, 162.0, 162.5, 163.5, 170.0 ppm. HRMS (TOF ES<sup>+</sup>): *m/z* calcd for C<sub>25</sub>H<sub>22</sub>N<sub>5</sub>O<sub>2</sub> [(M+H)<sup>+</sup>], 424.1768; found, 424.1766.

**2,2'-Di-*tert*-butyl-4'-(5-fluoro-2-hydroxyphenyl)-5-(pyridin-2-yl)-[4,5'-bipyrimidin]-6(1*H*)-one (5s)**

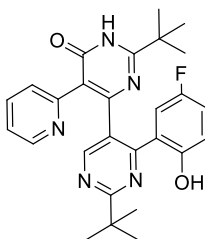

Yellow solid (85%, 201 mg); Mp: 274.3–275.4 °C; IR (KBr): 3692, 3412, 2405, 1653, 1582, 1486, 1385, 1121, 873, 744, 680, 615, 567, 521 cm<sup>-1</sup>; <sup>1</sup>H NMR (600

MHz, DMSO-*d*<sub>6</sub>):  $\delta$  = 1.16 (s, 9H, C(CH<sub>3</sub>)<sub>3</sub>), 1.35 (s, 9H, C(CH<sub>3</sub>)<sub>3</sub>), 6.78 (t, 1H, *J* = 4.7 Hz, ArH), 6.82-6.84 (m, 1H, ArH), 7.08 (s, 1H, ArH), 7.21 (d, *J* = 1.6 Hz, 1H, ArH), 7.31 (d, *J* = 7.9 Hz, 1H, ArH), 7.66 (d, *J* = 1.7 Hz, 1H, ArH), 8.33 (d, *J* = 4.4 Hz, 1H, ArH), 8.45 (s, 1H, ArH), 10.09 (s, 1H, ArOH), 12.45 (s, 1H, NH) ppm; <sup>13</sup>C NMR (150 MHz, DMSO-*d*<sub>6</sub>):  $\delta$  = 28.0, 28.0, 28.0, 29.8, 29.8, 29.8, 37.6, 39.5, 116.7 (d, *J*<sub>2</sub> = 24.0 Hz), 117.4, 117.4, 117.6 (d, *J*<sub>2</sub> = 22.5 Hz), 122.8, 125.9, 126.6, 129.6, 136.3, 148.8, 152.1, 152.9, 154.9, 157.3 (d, *J*<sub>1</sub> = 241.5 Hz), 157.9, 160.9, 162.7, 167.1, 175.3 ppm. <sup>19</sup>F NMR (564 MHz, DMSO-*d*<sub>6</sub>):  $\delta$  = -126.34 ppm. HRMS (TOF ES<sup>+</sup>): *m/z* calcd for C<sub>27</sub>H<sub>29</sub>FN<sub>5</sub>O<sub>2</sub> [(M+H)<sup>+</sup>], 474.2300; found, 474.2296.

**2,2'-Di-tert-butyl-4'-(2-hydroxyphenyl)-5-(pyridin-2-yl)-[4,5'-bipyrimidin]-6(1H)-one (5t)**

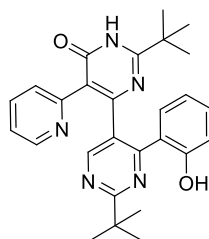

Yellow solid (84%, 191 mg); Mp: > 300 °C; IR (KBr): 3766, 3422, 2969, 2374, 1656, 1582, 1487, 1436, 1386, 1105, 1015, 754, 607, 560, 517 cm<sup>-1</sup>; <sup>1</sup>H NMR (600 MHz, DMSO-*d*<sub>6</sub>):  $\delta$  = 1.12 (s, 9H, C(CH<sub>3</sub>)<sub>3</sub>), 1.35 (s, 9H, C(CH<sub>3</sub>)<sub>3</sub>), 6.76-6.80 (m, 2H, ArH), 7.20-7.24 (m, 3H, ArH), 7.36 (d, *J* = 7.9 Hz, 1H, ArH), 7.65-7.67 (m, 1H, ArH), 7.66 (d, *J* = 1.7 Hz, 1H, ArH), 8.34 (d, *J* = 4.4 Hz, 1H, ArH), 8.37 (s, 1H, ArH), 10.47 (s, 1H, ArOH), 12.44 (s, 1H, NH) ppm; <sup>13</sup>C NMR (150 MHz, DMSO-*d*<sub>6</sub>):  $\delta$  = 28.0, 28.0, 28.0, 29.8, 29.8, 29.8, 37.6, 39.4, 116.6, 119.2, 119.2, 122.8, 124.1, 126.6, 129.2, 131.2, 131.3, 136.3, 148.8, 153.0, 156.3, 157.9, 158.4, 162.3, 162.8, 167.1, 174.9 ppm. HRMS (TOF ES<sup>+</sup>): *m/z* calcd for C<sub>27</sub>H<sub>30</sub>N<sub>5</sub>O<sub>2</sub> [(M+H)<sup>+</sup>], 456.2394; found, 456.2393.

**5-(6-Ethylpyridin-2-yl)-4'-(2-hydroxy-5-nitrophenyl)-2,2'-diphenyl-[4,5'-bipyrimidin]-6(1H)-one (5u)**

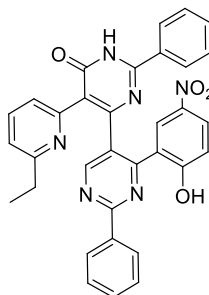

Yellow solid (83%, 236 mg); Mp: >300 °C; IR (KBr): 3708, 3433, 2368, 1656, 1506, 1433, 1355, 1104, 823, 735, 695, 606, 544 cm<sup>-1</sup>; <sup>1</sup>H NMR (600 MHz, DMSO-*d*<sub>6</sub>): δ = 2.74 (s, 2H, CH<sub>2</sub>), 2.89 (s, 3H, CH<sub>3</sub>), 6.71 (d, *J* = 8.7 Hz, 1H, ArH), 6.83 (d, *J* = 1.56 Hz, 1H, ArH), 7.12 (d, *J* = 7.9 Hz, 1H, ArH), 7.19 (s, 1H, ArH), 7.33-7.35 (m, 1H, ArH), 7.54-7.62 (m, 5H, ArH), 7.96 (s, 1H, ArH), 8.13 (d, *J* = 7.5 Hz, 2H, ArH), 8.26 (d, *J* = 4.0 Hz, 1H, ArH), 8.42 (t, *J* = 4.5 Hz, 2H, ArH), 8.98 (s, 1H, ArH), 10.10 (s, 1H, ArOH) ppm; <sup>13</sup>C NMR (150 MHz, DMSO-*d*<sub>6</sub>): δ = 31.3, 36.3, 111.0, 118.3, 122.4, 126.4, 127.8, 128.3, 128.3, 128.4, 128.4, 128.4, 129.1, 129.1, 129.1, 129.3, 129.3, 129.3, 131.4, 131.6, 132.4, 132.7, 133.5, 136.2, 137.0, 137.2, 148.7, 152.2, 154.4, 158.9, 160.9, 162.8, 162.9 ppm. HRMS (TOF ES<sup>+</sup>): *m/z* calcd for C<sub>33</sub>H<sub>25</sub>N<sub>6</sub>O<sub>4</sub> [(M+H)<sup>+</sup>], 569.1932; found, 569.1929.

**4'-(5-Bromo-2-hydroxyphenyl)-5-(6-ethylpyridin-2-yl)-2,2'-diphenyl-[4,5'-bipyridin]-6(1*H*)-one (5v)**

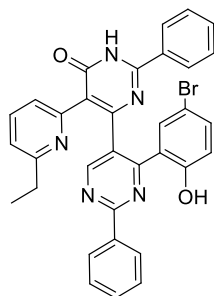

Yellow solid (83%, 249 mg); Mp: >300 °C; IR (KBr): 3749, 3451, 2343, 1651, 1533, 1402, 1367, 1105, 879, 688, 606, 544 cm<sup>-1</sup>; <sup>1</sup>H NMR (600 MHz, DMSO-*d*<sub>6</sub>): δ = 1.16-1.22 (m, 3H, CH<sub>3</sub>), 2.58-2.62 (m, 2H, CH<sub>2</sub>), 6.70 (d, *J* = 8.7 Hz, 1H, ArH), 6.78 (d, *J* = 1.7 Hz, 1H, ArH), 7.03 (d, *J* = 8.1 Hz, 1H, ArH), 7.32-7.34 (m, 1H, ArH), 7.42-7.44 (m, 1H, ArH), 7.53-7.62 (m, 6H, ArH), 8.11 (s, 1H, ArH), 8.15 (d, *J* = 7.5 Hz, 2H, ArH), 8.41-8.42 (m, 2H, ArH), 9.01 (s, 1H, ArH), 10.06 (s, 1H, ArOH), 13.09 (s, 1H, NH) ppm; <sup>13</sup>C NMR (150 MHz, DMSO-*d*<sub>6</sub>): δ = 15.4, 25.6, 111.0, 118.2, 125.9, 127.8, 128.3, 128.3, 128.3, 128.4, 128.4, 128.4, 128.4, 129.1, 129.3, 131.5, 131.5, 131.5, 131.6, 131.6, 131.6, 132.3, 132.6, 133.4, 135.4, 137.2, 137.8, 148.1, 149.7, 154.4, 158.9, 160.8, 162.8 ppm. HRMS (TOF ES<sup>+</sup>): *m/z* calcd for C<sub>33</sub>H<sub>25</sub>BrN<sub>5</sub>O<sub>2</sub> [(M+H)<sup>+</sup>], 602.1186; found, 602.1186.



## The Proposed Mechanism of the Cascade Reaction

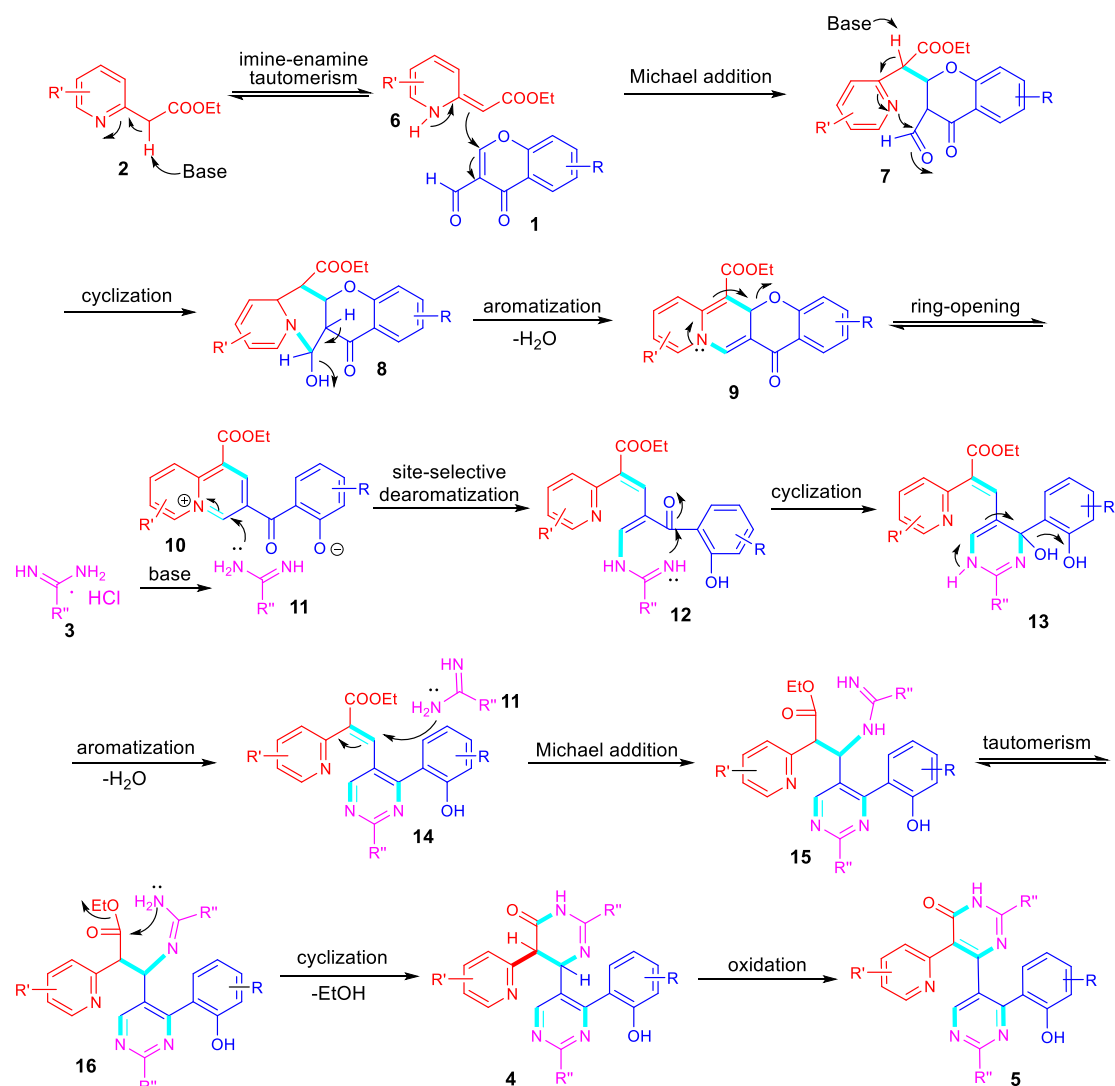

**Scheme S1. The proposed mechanism of the cascade reaction.**

The proposed mechanism of the multi-component cascade reaction is shown in Scheme S1 of the supporting information. First, the ethyl 2-(pyridine-2-yl)acetate derivatives **2** underwent base-catalyzed imine-enamine tautomerization to form the enamine ester intermediate **6**. Then, the  $\alpha$ -carbon of intermediates **6** attacked the double bonds of 3-formylchromones **1** and formed the intermediates **7** through a Michael addition. The intermediate **7** produced intermediate **9** via an intramolecular condensation with the concomitant loss of one molecule of water. Intermediate **9** then underwent a reversible ring-opening tautomerization to generate intermediate **10**. Upon the deprotonation of the amidine hydrochloride **3** by the base promoter, intermediate **11** attacked the double bond of pyridinium salts through a site-selective dearomatization reaction to produce intermediate **12**. Next, intermediate **13** was formed through an intramolecular condensation-cyclization of intermediate **11**. The amine of intermediate **11** underwent Michael addition to the double bond of

intermediate **14** to form intermediate **15**, which then underwent reversible tautomerization and subsequent intramolecular condensation reaction to form the target compound **4**. Finally, compound **4** formed target compound **5** via an oxidation reaction facilitated by heat.

To verify the mechanism of this reaction, 3-formylchromone **1f**, 2-(pyridine-2-yl)acetate **2a** and benzimidamide hydrochloride **3b** and DMF were charged in round-bottom flask, and then Cs<sub>2</sub>CO<sub>3</sub> were added to the mixture. The mixture was stirred at 110 °C for approximately 35 minutes. Subsequently, the reaction mixture was analyzed by high-performance liquid chromatography-high resolution mass spectrometry (HPLC-HRMS). The molecular ion peaks that appeared in the high-resolution mass spectrum were: HRMS (TOF ES<sup>+</sup>): *m/z* calcd. for C<sub>10</sub>H<sub>7</sub>O<sub>3</sub> [M+H]<sup>+</sup>, 175.0390; found, 175.0383, which is the HRMS spectrum of **1f** (SI, Figure S84); HRMS (TOF ES<sup>+</sup>): *m/z* calcd. for C<sub>9</sub>H<sub>12</sub>NO<sub>2</sub> [M+H]<sup>+</sup>, 166.0863; found, 166.0857, which is the HRMS spectra of **2a/6a** (SI, Figure S85); HRMS (TOF ES<sup>+</sup>): *m/z* calcd. for C<sub>19</sub>H<sub>18</sub>NO<sub>5</sub> [M+H]<sup>+</sup>, 340.1179; found, 340.1174, which is the HRMS spectra of intermediate **7f/8f** (SI, Figure S86); HRMS (TOF ES<sup>+</sup>): *m/z* calcd. for C<sub>19</sub>H<sub>16</sub>NO<sub>4</sub> [M+H]<sup>+</sup>, 322.1074; found, 322.1069. HRMS (TOF ES<sup>+</sup>): *m/z* calcd. for C<sub>19</sub>H<sub>16</sub>NO<sub>4</sub> [M+H]<sup>+</sup>, 322.1074; found, 322.1068. There are the HRMS spectra of intermediates **9f/10f** (SI, Figure S87–S88); HRMS (TOF ES<sup>+</sup>): *m/z* calcd. for C<sub>26</sub>H<sub>24</sub>N<sub>3</sub>O<sub>4</sub> [M+H]<sup>+</sup>, 442.1761; found, 442.1755. HRMS (TOF ES<sup>+</sup>): *m/z* calcd. for C<sub>26</sub>H<sub>24</sub>N<sub>3</sub>O<sub>4</sub> [M+H]<sup>+</sup>, 442.1761; found, 442.1750. There are the HRMS spectra of intermediates **12f/13f** (SI, Figure S89–S90); HRMS (TOF ES<sup>+</sup>): *m/z* calcd. for C<sub>26</sub>H<sub>22</sub>N<sub>3</sub>O<sub>3</sub> [M+H]<sup>+</sup>, 424.1656; found, 424.1647, which is the HRMS spectrum of intermediate **14f** (SI, Figure S91). HRMS (TOF ES<sup>+</sup>): *m/z* calcd. for C<sub>33</sub>H<sub>30</sub>N<sub>5</sub>O<sub>3</sub> [M+H]<sup>+</sup>, 544.2343; found, 544.2332. HRMS (TOF ES<sup>+</sup>): *m/z* calcd. for C<sub>33</sub>H<sub>30</sub>N<sub>5</sub>O<sub>3</sub> [M+H]<sup>+</sup>, 544.2343; found, 544.2349, which are the HRMS spectrum of the target compound **15f/16f** (SI, Figure S92–93). HRMS (TOF ES<sup>+</sup>): *m/z* calcd. for C<sub>31</sub>H<sub>24</sub>N<sub>5</sub>O<sub>2</sub> [M+H]<sup>+</sup>, 498.1925; found, 498.1932, which is the HRMS spectrum of **4** (SI, Figure S95); HRMS (TOF ES<sup>+</sup>): *m/z* calcd. for C<sub>31</sub>H<sub>22</sub>N<sub>5</sub>O<sub>2</sub> [M+H]<sup>+</sup>, 496.1768; found, 496.1774, which is the HRMS spectrum of **5f** (SI, Figure S96); Based on the molecular ion peaks of intermediates **7f–16f**, the proposed mechanism of the cascade reaction is reasonable (Scheme S1).

## Control Experiments

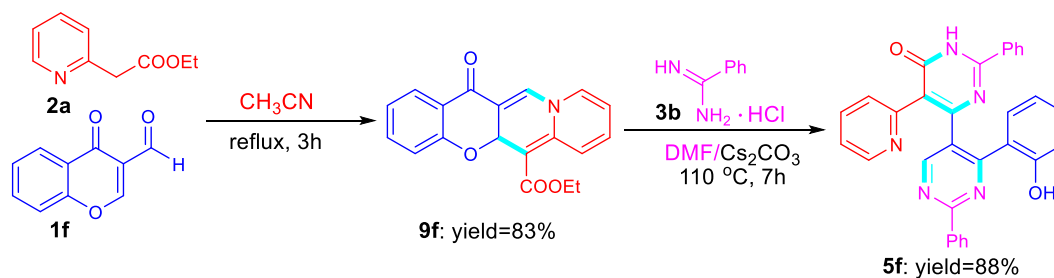

**Scheme S2.** Control experiments

First, 3-formylchromone **1f** (1.0 mmol) and 2-(pyridine-2-yl)acetate **2a** (1.0 mmol) were charged into a round-bottom flask. Then, acetonitrile (6 ml) was added to the mixture. The mixture was stirred at reflux for approximately 3 hours and monitored by TLC until the intermediate was completely consumed. The reaction mixture was cooled to room temperature and was extracted with ethyl acetate ( $3 \times 15\text{ mL}$ ). The organic layer was washed with water and brine, and the combined organic phases were dried over  $\text{MgSO}_4$ , filtered, and concentrated under reduced pressure to afford the crude product. Finally, product **9f** was purified from the crude mixture by flash column chromatography.

A round-bottom flask were charged with compound **9f** (0.5 mmol), benzimidamide hydrochlorides **3b** (0.5 mmol) and DMF (3 mL), and the mixture was stirred under reflux for approximately 10 hours while monitoring the reaction by TLC until the compound **9f** was completely consumed. After cooling the reaction to room temperature, the mixture was extracted with ethyl acetate ( $3 \times 15\text{ mL}$ ). The organic layer was washed with water and brine, and the combined organic phases were dried over  $\text{MgSO}_4$ , filtered, and concentrated under reduced pressure to afford the crude product. Finally, product **5f** was purified from the crude mixture by flash column chromatography over silica gel using a mixture of petroleum ether/ethyl acetate (2:1, v/v) as the eluent.

### Ethyl 13-oxo-5a,13-dihydrochromeno[2,3-*b*]quinolizine-6-carboxylate (**9f**)

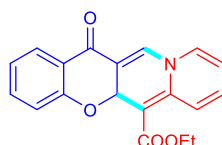

Red solid (83%, 133 mg); Mp:  $231.5\text{-}232.3\text{ }^\circ\text{C}$ ; IR (KBr): 2928, 1674, 1641, 1593, 1526, 1489, 1384, 1338, 1222, 1192, 1043,  $773\text{ cm}^{-1}$ ;  $^1\text{H NMR}$  (600 MHz,

DMSO- $d_6$ ):  $\delta$  = 1.27 (t,  $J$  = 6.9 Hz, 3H, CH<sub>3</sub>), 4.16-4.19 (m, 2H, CH<sub>2</sub>), 7.10-7.13 (m, 2H, ArH), 7.19 (t,  $J$  = 6.3 Hz, 1H, ArH), 7.47 (s, 1H, ArH), 7.63 (t,  $J$  = 7.0 Hz, 1H, ArH), 7.80-7.83 (m, 2H, ArH), 7.91 (s, 1H, ArH), 8.34 (d,  $J$  = 5.9 Hz, 1H, ArH), 8.81 (d,  $J$  = 8.9 Hz, 1H, ArH) ppm; <sup>13</sup>C NMR (150 MHz, DMSO- $d_6$ ):  $\delta$  = 14.9, 59.6, 89.0, 90.8, 107.3, 116.3, 118.5, 122.0, 123.2, 124.2, 127.1, 133.0, 136.2, 139.3, 139.6, 148.0, 154.8, 165.3, 178.4 ppm. HRMS (TOF ES<sup>+</sup>):  $m/z$  calcd for C<sub>19</sub>H<sub>16</sub>NO<sub>4</sub> [(M+H)<sup>+</sup>], 322.1074; found, 322.1071.

### X-ray Structure and Data of 4j and 5d.

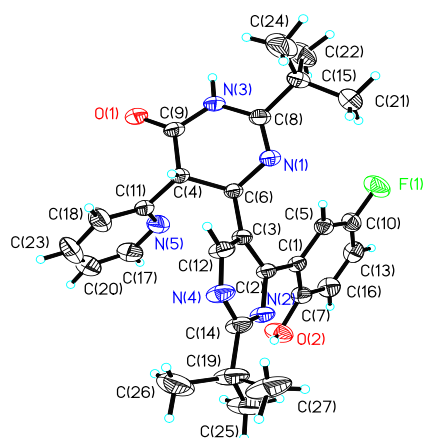

**Figure S1.** X-Ray crystal structure of **4j**

**Table S2.** Crystal data and structure refinement for **4j**

|                                 |                                           |                             |
|---------------------------------|-------------------------------------------|-----------------------------|
| Identification code             | 1                                         |                             |
| Empirical formula               | $C_{27}H_{30}FN_5O_{2.5}$                 |                             |
| Formula weight                  | 483.56                                    |                             |
| Temperature                     | 296.15 K                                  |                             |
| Crystal system                  | triclinic                                 |                             |
| Space group                     | P-1                                       |                             |
| Unit cell dimensions            | $a = 11.2453(13) \text{ \AA}$             | $\alpha = 92.075(2)^\circ$  |
|                                 | $b = 11.7271(13) \text{ \AA}$             | $\beta = 114.267(2)^\circ$  |
|                                 | $c = 12.9426(16) \text{ \AA}$             | $\gamma = 104.496(2)^\circ$ |
| Volume                          | $1487.7(3) \text{ \AA}^3$                 |                             |
| Z                               | 2                                         |                             |
| Density (calculated)            | $1.079 \text{ g/cm}^3$                    |                             |
| Absorption coefficient          | $0.075 \text{ mm}^{-1}$                   |                             |
| F(000)                          | 512                                       |                             |
| Theta range for data collection | 4.654 to 55.29 °                          |                             |
| Index ranges                    | -14 ≤ h ≤ 14, -6 ≤ k ≤ 15, -16 ≤ l ≤ 16   |                             |
| Reflections collected           | 9078                                      |                             |
| Independent reflections         | 6522 [R(int) = 0.0207, R(sigma) = 0.0549] |                             |
| Refinement method               | Full-matrix least-squares on $F^2$        |                             |
| Data / restraints / parameters  | 6522 / 90 / 372                           |                             |
| Goodness-of-fit on $F^2$        | 1.014                                     |                             |
| Final R indexes [I ≥ 2σ(I)]     | $R_1 = 0.0884$ , $wR_2 = 0.2421$          |                             |
| Final R indexes (all data)      | $R_1 = 0.1587$ , $wR_2 = 0.3077$          |                             |
| Extinction coefficient          | n/a                                       |                             |
| Largest diff. peak and hole     | 0.78 / -0.31 e.Å <sup>-3</sup>            |                             |

**Table S3.** Bond Lengths for **4j**

| Atom | Atom | Length/Å | Atom | Atom | Length/Å  |
|------|------|----------|------|------|-----------|
| F1   | C10  | 1.370(4) | C4   | C11  | 1.508(4)  |
| O1   | C9   | 1.215(4) | C5   | C10  | 1.367(4)  |
| O2   | C7   | 1.356(4) | C7   | C16  | 1.390(4)  |
| N1   | C6   | 1.458(4) | C8   | C15  | 1.524(5)  |
| N1   | C8   | 1.269(4) | C10  | C13  | 1.371(5)  |
| N2   | C2   | 1.360(4) | C11  | C18  | 1.384(5)  |
| N2   | C14  | 1.327(4) | C13  | C16  | 1.365(5)  |
| N3   | C8   | 1.405(4) | C14  | C19  | 1.515(5)  |
| N3   | C9   | 1.350(4) | C15  | C21  | 1.531(6)  |
| N4   | C12  | 1.332(4) | C15  | C22  | 1.538(6)  |
| N4   | C14  | 1.341(4) | C15  | C24  | 1.505(6)  |
| N5   | C11  | 1.324(4) | C17  | C20  | 1.326(6)  |
| N5   | C17  | 1.340(5) | C18  | C23  | 1.403(7)  |
| C1   | C2   | 1.488(4) | C19  | C25  | 1.533(15) |
| C1   | C5   | 1.397(4) | C19  | C26  | 1.497(12) |
| C1   | C7   | 1.398(4) | C19  | C27  | 1.617(13) |
| C2   | C3   | 1.392(4) | C19  | C25A | 1.46(2)   |
| C3   | C6   | 1.514(4) | C19  | C27A | 1.333(14) |
| C3   | C12  | 1.383(4) | C19  | C26A | 1.78(2)   |
| C4   | C6   | 1.538(4) | C20  | C23  | 1.368(7)  |
| C4   | C9   | 1.516(4) |      |      |           |

**Table S4.** Bond Angles for **4j**

| Atom | Atom | Atom | Angle/°  | Atom | Atom | Atom | Angle/°  |
|------|------|------|----------|------|------|------|----------|
| C8   | N1   | C6   | 117.0(3) | C5   | C10  | C13  | 123.0(3) |
| C14  | N2   | C2   | 119.2(2) | N5   | C11  | C4   | 116.2(3) |
| C9   | N3   | C8   | 124.1(3) | N5   | C11  | C18  | 122.4(3) |
| C12  | N4   | C14  | 114.9(3) | C18  | C11  | C4   | 121.4(3) |
| C11  | N5   | C17  | 117.7(3) | N4   | C12  | C3   | 125.6(3) |
| C5   | C1   | C2   | 120.0(2) | C16  | C13  | C10  | 118.0(3) |
| C5   | C1   | C7   | 118.3(3) | N2   | C14  | N4   | 124.4(3) |
| C7   | C1   | C2   | 121.5(3) | N2   | C14  | C19  | 118.1(3) |
| N2   | C2   | C1   | 115.0(2) | N4   | C14  | C19  | 117.5(3) |
| N2   | C2   | C3   | 119.9(2) | C8   | C15  | C21  | 110.0(3) |
| C3   | C2   | C1   | 125.1(2) | C8   | C15  | C22  | 108.8(3) |
| C2   | C3   | C6   | 124.5(2) | C21  | C15  | C22  | 108.0(4) |
| C12  | C3   | C2   | 114.8(2) | C24  | C15  | C8   | 109.3(3) |
| C12  | C3   | C6   | 120.6(2) | C24  | C15  | C21  | 111.1(4) |
| C9   | C4   | C6   | 109.3(2) | C24  | C15  | C22  | 109.6(4) |
| C11  | C4   | C6   | 112.3(2) | C13  | C16  | C7   | 121.3(3) |
| C11  | C4   | C9   | 112.4(3) | C20  | C17  | N5   | 125.0(5) |

|     |     |     |          |      |     |      |           |
|-----|-----|-----|----------|------|-----|------|-----------|
| C10 | C5  | C1  | 119.3(3) | C11  | C18 | C23  | 117.1(4)  |
| N1  | C6  | C3  | 112.3(2) | C14  | C19 | C25  | 112.3(8)  |
| N1  | C6  | C4  | 113.3(2) | C14  | C19 | C27  | 104.2(6)  |
| C3  | C6  | C4  | 111.3(2) | C14  | C19 | C26A | 101.3(7)  |
| O2  | C7  | C1  | 122.5(3) | C25  | C19 | C27  | 111.8(8)  |
| O2  | C7  | C16 | 117.5(3) | C26  | C19 | C14  | 108.5(5)  |
| C16 | C7  | C1  | 120.0(3) | C26  | C19 | C25  | 110.6(9)  |
| N1  | C8  | N3  | 122.9(3) | C26  | C19 | C27  | 109.2(8)  |
| N1  | C8  | C15 | 121.3(3) | C25A | C19 | C14  | 111.6(11) |
| N3  | C8  | C15 | 115.7(3) | C25A | C19 | C26A | 102.4(13) |
| O1  | C9  | N3  | 122.1(3) | C27A | C19 | C14  | 118.7(7)  |
| O1  | C9  | C4  | 123.0(3) | C27A | C19 | C25A | 119.7(14) |
| N3  | C9  | C4  | 114.8(3) | C27A | C19 | C26A | 98.3(12)  |
| F1  | C10 | C13 | 118.7(3) | C17  | C20 | C23  | 117.8(4)  |
| C5  | C10 | F1  | 118.3(3) | C20  | C23 | C18  | 120.0(4)  |

---

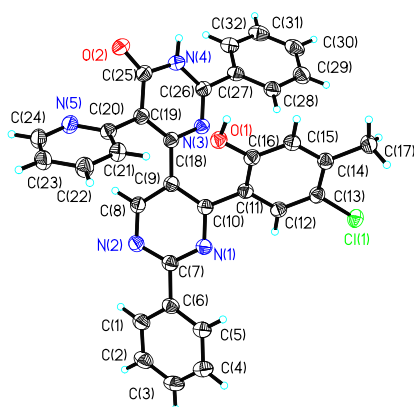

**Figure S2.** X-Ray crystal structure of **5d**

**Table S5.** Crystal data and structure refinement for **5d**

|                                   |                                                   |                            |
|-----------------------------------|---------------------------------------------------|----------------------------|
| Identification code               | 1                                                 |                            |
| Empirical formula                 | $C_{31}H_{20}ClN_5O_2$                            |                            |
| Formula weight                    | 529.97                                            |                            |
| Temperature                       | 296(2) K                                          |                            |
| Wavelength                        | 0.71073 Å                                         |                            |
| Crystal system, space group       | Monoclinic, P 21/n                                |                            |
| Unit cell dimensions              | $a = 15.007(3)$ Å                                 | $\alpha = 90.0^\circ$      |
|                                   | $b = 15.204(3)$ Å                                 | $\beta = 113.696(4)^\circ$ |
|                                   | $c = 16.146(3)$ Å                                 | $\gamma = 90.0^\circ$      |
| Volume                            | $3373.3(12)$ Å <sup>3</sup>                       |                            |
| Z                                 | 4                                                 |                            |
| Density (calculated)              | $1.044$ Mg/m <sup>3</sup>                         |                            |
| Absorption coefficient            | $0.143$ mm <sup>-1</sup>                          |                            |
| F(000)                            | 1096                                              |                            |
| Theta range for data collection   | 1.566 to 25.150 °                                 |                            |
| Crystal size                      | 0.220 x 0.200 x 0.180 mm                          |                            |
| Limiting indices                  | -17<=h<=17, -18<=k<=14, -19<=l<=19                |                            |
| Reflections collected / unique    | 15794 / 6022 [R(int) = 0.0618]                    |                            |
| Independent reflections           | 6522 [R(int) = 0.0207, R(sigma) = 0.0549]         |                            |
| Completeness to theta = 25.242    | 98.6 %                                            |                            |
| Absorption correction             | Semi-empirical from equivalents                   |                            |
| Refinement method                 | Full-matrix least-squares on F <sup>2</sup>       |                            |
| Data / restraints / parameters    | 6022 / 0 / 342                                    |                            |
| Goodness-of-fit on F <sup>2</sup> | 1.013                                             |                            |
| Final R indexes [I>=2sigma(I)]    | R <sub>1</sub> = 0.0871, wR <sub>2</sub> = 0.2178 |                            |
| Final R indexes (all data)        | R <sub>1</sub> = 0.1644, wR <sub>2</sub> = 0.2813 |                            |
| Extinction coefficient            | 0.0028(9)                                         |                            |
| Largest diff. peak and hole       | 0.624 and -0.415 e.Å <sup>-3</sup>                |                            |



**Table S6.** Bond Lengths [Å] for **5d**

| Atom | Atom | Length/Å | Atom | Atom | Length/Å  |
|------|------|----------|------|------|-----------|
| C11  | C12  | 1.3900   | C2   | C3   | 1.382(8)  |
| C11  | C16  | 1.3900   | C3   | C4   | 1.380(8)  |
| C11  | C10  | 1.476(6) | C4   | C5   | 1.365(7)  |
| C12  | C13  | 1.3900   | C5   | C6   | 1.397(7)  |
| C13  | C14  | 1.3900   | C6   | C7   | 1.478(7)  |
| C14  | C15  | 1.3900   | C7   | C8   | 1.390(7)  |
| C15  | C16  | 1.3900   | C8   | C9   | 1.380(7)  |
| C11  | C4   | 1.733(6) | C8   | C17  | 1.466(7)  |
| N1   | C7   | 1.350(4) | C17  | C18  | 1.371(7)  |
| N1   | C10  | 1.337(6) | C18  | C19  | 1.436(7)  |
| N2   | C9   | 1.329(6) | C18  | C21  | 1.481(7)  |
| N2   | C10  | 1.330(6) | C20  | C26  | 1.463(7)  |
| N3   | C20  | 1.306(6) | C21  | C22  | 1.381(7)  |
| N3   | C17  | 1.381(6) | C22  | C23  | 1.370(7)  |
| N4   | C20  | 1.356(6) | C23  | C24  | 1.371(8)  |
| N4   | C19  | 1.377(6) | C24  | C25  | 1.370(8)  |
| N5   | C21  | 1.327(6) | C26  | C27  | 1.342(8)  |
| N5   | C25  | 1.353(6) | C26  | C31  | 1.414(8)  |
| O1   | C1   | 1.380(6) | C27  | C28  | 1.383(8)  |
| O2   | C19  | 1.247(6) | C28  | C29  | 1.311(9)  |
| C1   | C2   | 1.383(7) | C29  | C30  | 1.423(10) |
| C1   | C6   | 1.381(7) | C30  | C31  | 1.382(9)  |

**Table S7.** Bond Angles for **5d**

| Atom | Atom | Atom | Angle/°  | Atom | Atom | Atom | Angle/°  |
|------|------|------|----------|------|------|------|----------|
| C12  | C11  | C16  | 120.0    | N2   | C9   | C8   | 123.8(5) |
| C12  | C11  | C10  | 119.5(3) | N2   | C10  | N1   | 117.4(4) |
| C16  | C11  | C10  | 120.5(3) | N1   | C10  | C11  | 117.3(4) |
| C11  | C12  | C13  | 120.0    | C18  | C17  | N3   | 123.1(5) |
| C14  | C13  | C12  | 120.0    | C18  | C17  | C8   | 125.4(4) |
| C13  | C14  | C15  | 120.0    | N3   | C17  | C8   | 111.4(4) |
| C16  | C15  | C14  | 120.0    | C17  | C18  | C19  | 117.6(5) |
| C15  | C16  | C11  | 120.0    | C17  | C18  | C21  | 124.3(5) |
| C7   | N1   | C10  | 117.9(4) | C19  | C18  | C21  | 118.1(4) |
| C9   | N2   | C10  | 116.1(4) | O2   | C19  | N4   | 118.7(5) |
| C20  | N3   | C17  | 118.6(4) | O2   | C19  | C18  | 125.5(5) |

|     |    |     |          |     |     |     |          |
|-----|----|-----|----------|-----|-----|-----|----------|
| C20 | N4 | C19 | 123.6(4) | N4  | C19 | C18 | 115.8(5) |
| C21 | N5 | C25 | 117.7(5) | N3  | C20 | N4  | 121.1(5) |
| O1  | C1 | C2  | 121.1(5) | N3  | C20 | C26 | 119.5(4) |
| O1  | C1 | C6  | 117.4(5) | N4  | C20 | C26 | 119.3(5) |
| C2  | C1 | C6  | 121.4(5) | N5  | C21 | C22 | 122.4(5) |
| C3  | C2 | C1  | 120.2(5) | N5  | C21 | C18 | 116.2(4) |
| C4  | C3 | C2  | 118.7(5) | C22 | C21 | C18 | 121.4(5) |
| C5  | C4 | C3  | 121.0(5) | C23 | C22 | C21 | 119.3(5) |
| C5  | C4 | Cl1 | 119.7(5) | C24 | C23 | C22 | 119.1(5) |
| C3  | C4 | Cl1 | 119.3(4) | C23 | C24 | C25 | 118.7(6) |
| C4  | C5 | C6  | 121.1(5) | N5  | C25 | C24 | 122.8(5) |
| C5  | C6 | C1  | 117.5(5) | C27 | C26 | C31 | 118.8(6) |
| C5  | C6 | C7  | 118.2(5) | C27 | C26 | C20 | 124.6(5) |
| C1  | C6 | C7  | 124.3(5) | C31 | C26 | C20 | 116.5(5) |
| N1  | C7 | C8  | 120.4(4) | C26 | C27 | C28 | 121.5(6) |
| N1  | C7 | C6  | 114.6(4) | C29 | C28 | C27 | 121.6(6) |
| C8  | C7 | C6  | 125.0(5) | C28 | C29 | C30 | 118.7(7) |
| C7  | C8 | C9  | 116.3(5) | C31 | C30 | C29 | 120.0(7) |
| C7  | C8 | C17 | 126.9(4) | C30 | C31 | C26 | 118.7(7) |
| C9  | C8 | C17 | 116.7(4) |     |     |     |          |

---

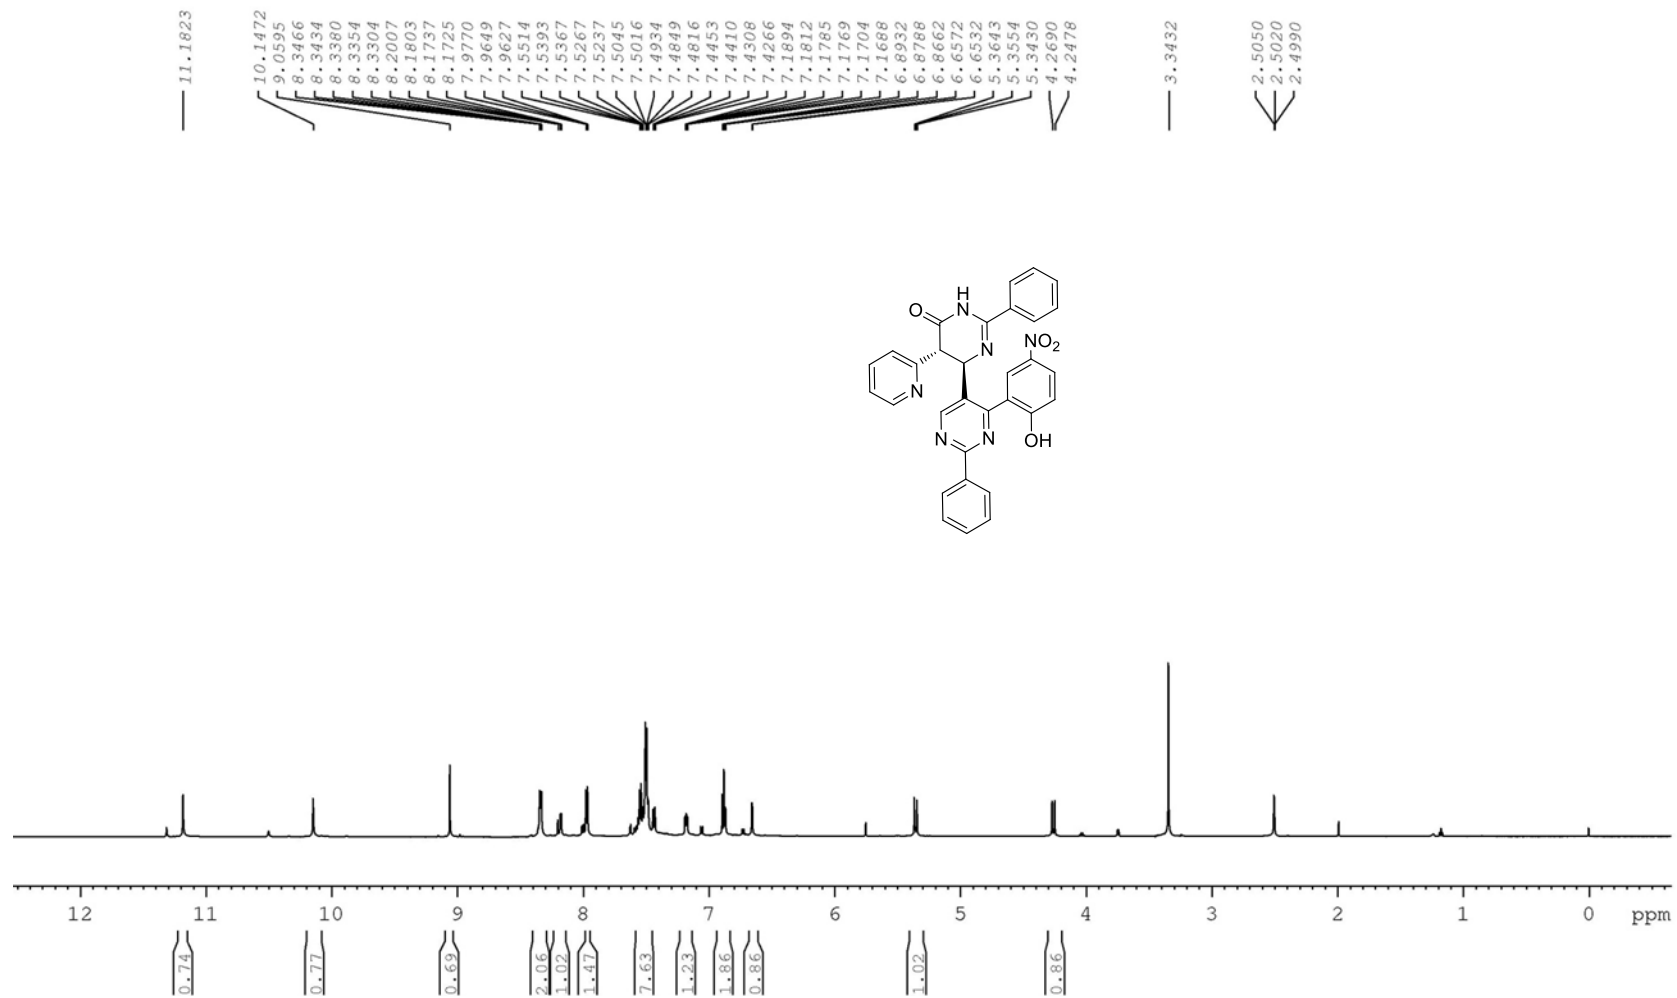

Figure S3. <sup>1</sup>H NMR (600 MHz, DMSO-*d*<sub>6</sub>) spectra of compound 4a

DEPT135

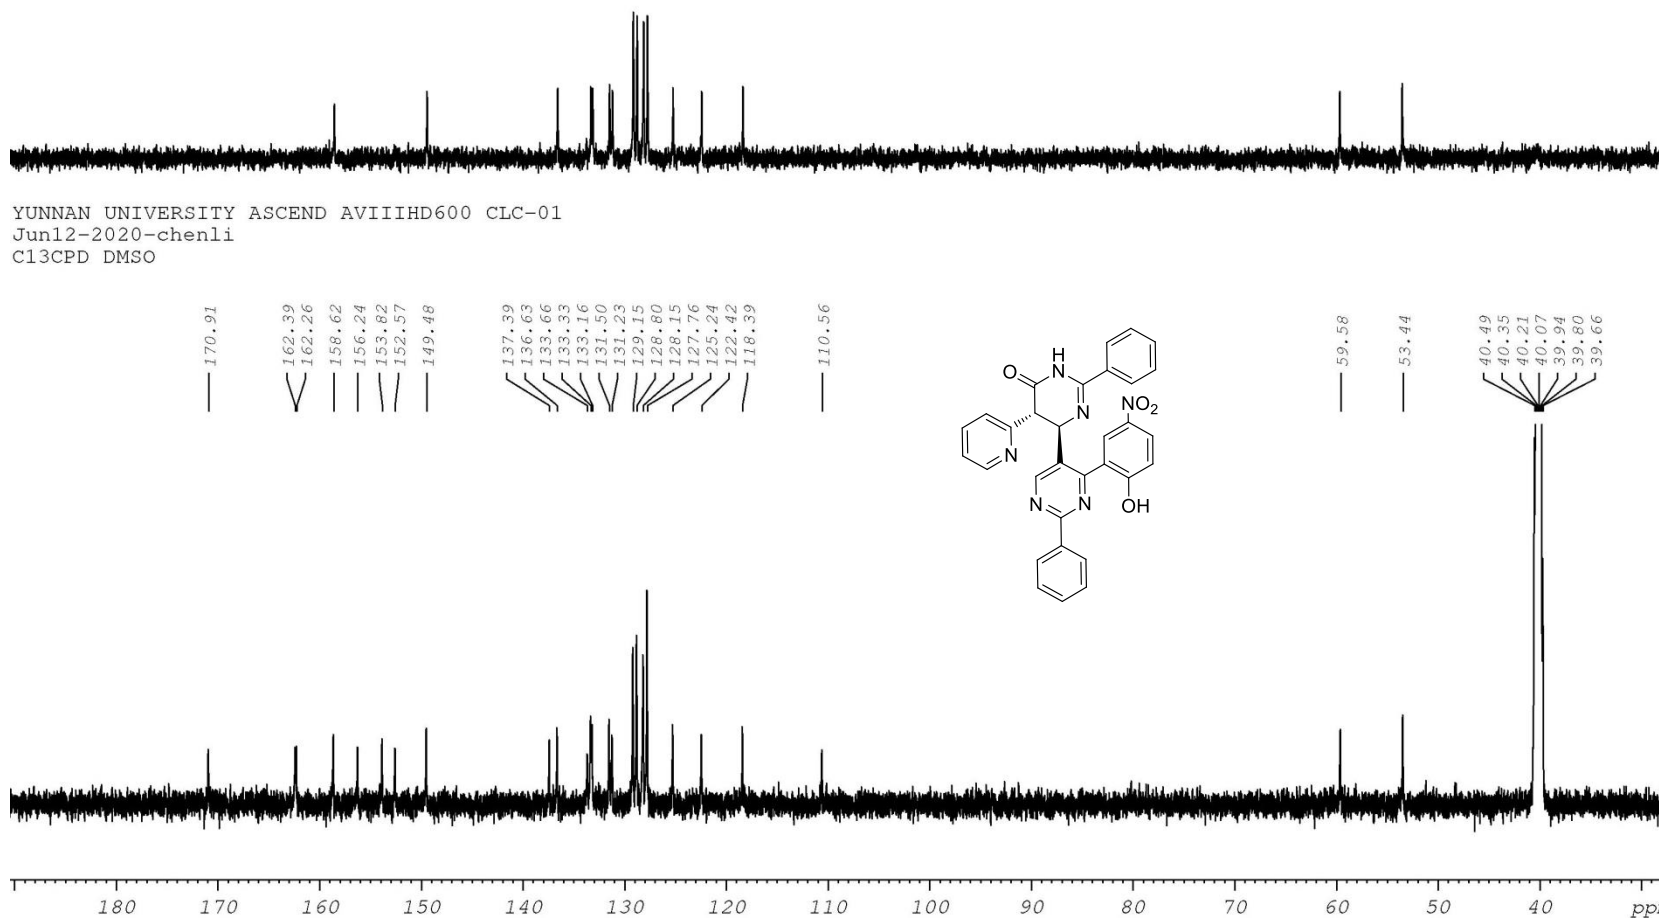

Figure S4.  $^{13}\text{C}$  NMR (150 MHz,  $\text{DMSO-}d_6$ ) spectra of compound 4a

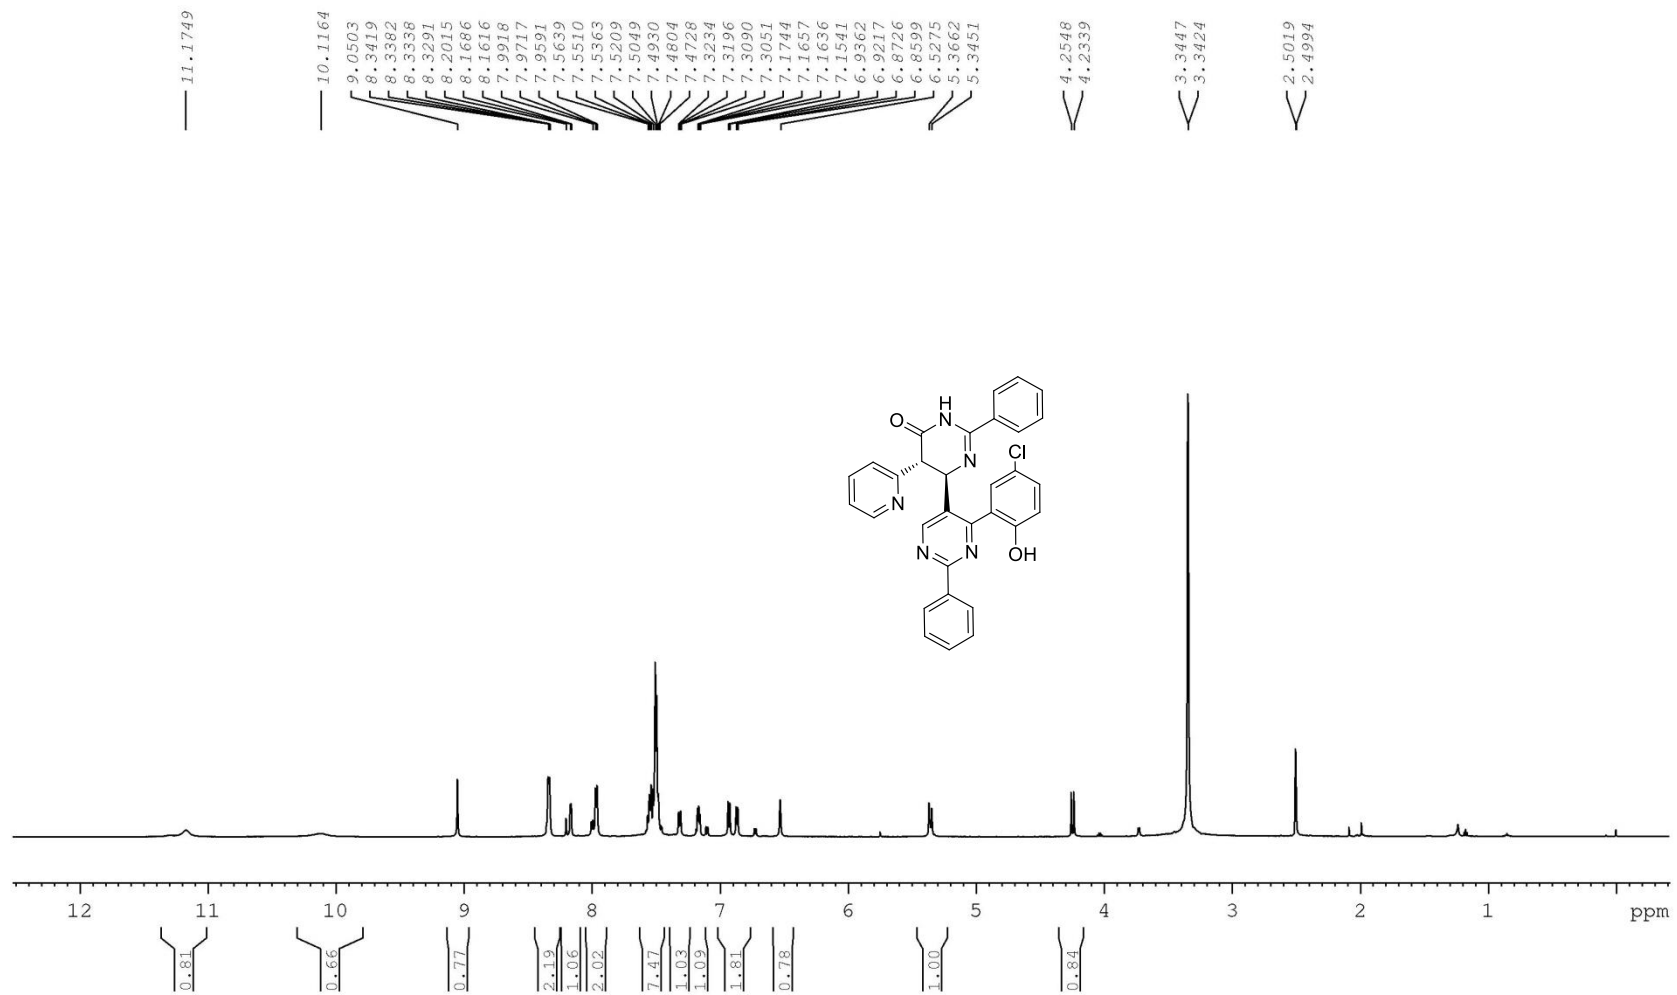

**Figure S5.**  $^1\text{H}$  NMR (600 MHz,  $\text{DMSO-}d_6$ ) spectra of compound **4b**

DEPT135

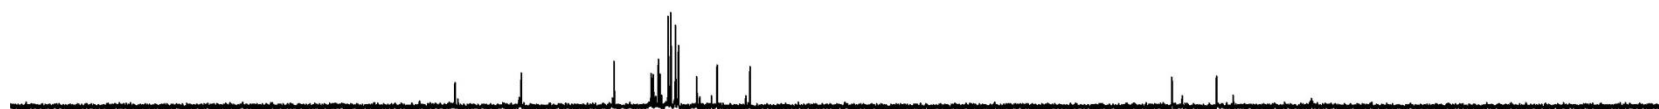

YUNNAN UNIVERSITY ASCEND AVIIIHD600 CLC-02  
Jun15-2020-chenli  
C13CPD DMSO

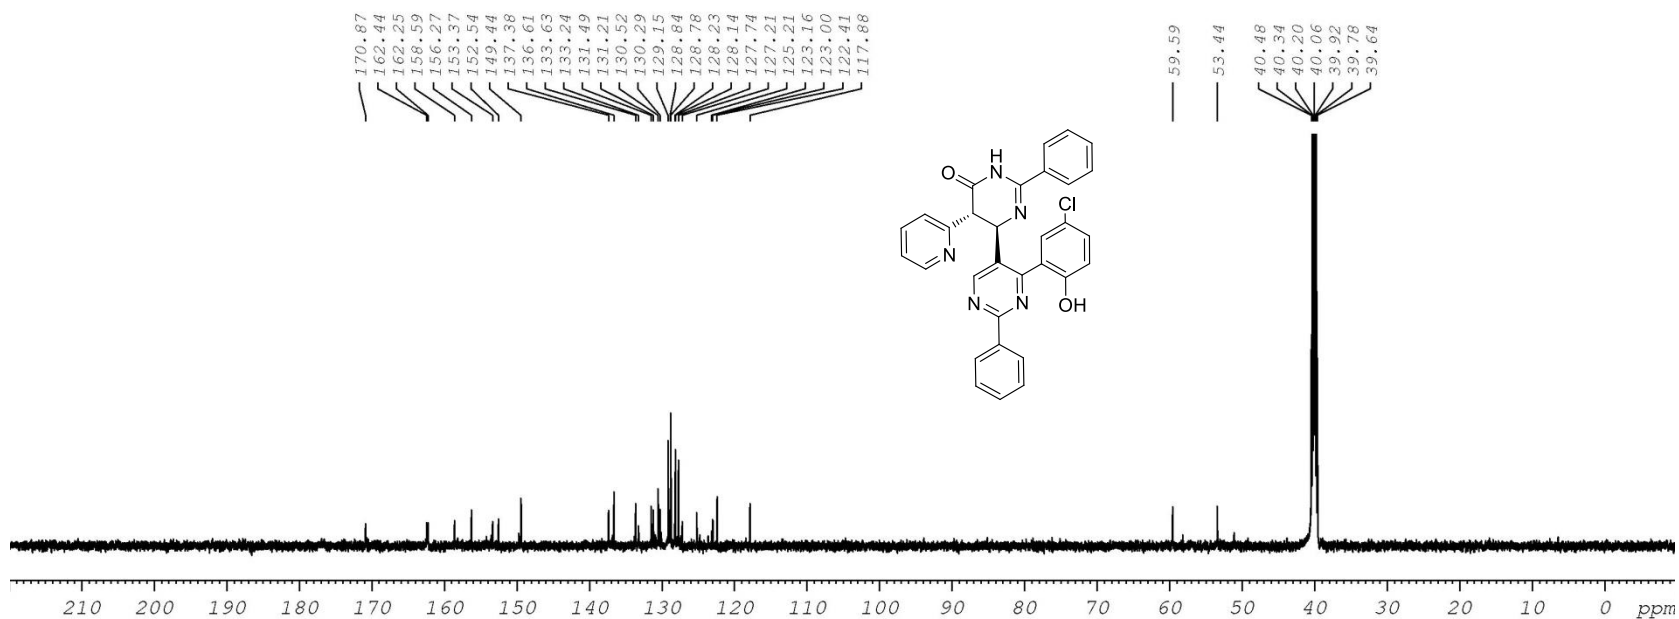

Figure S6.  $^{13}\text{C}$  NMR (150 MHz,  $\text{DMSO-}d_6$ ) spectra of compound 4b

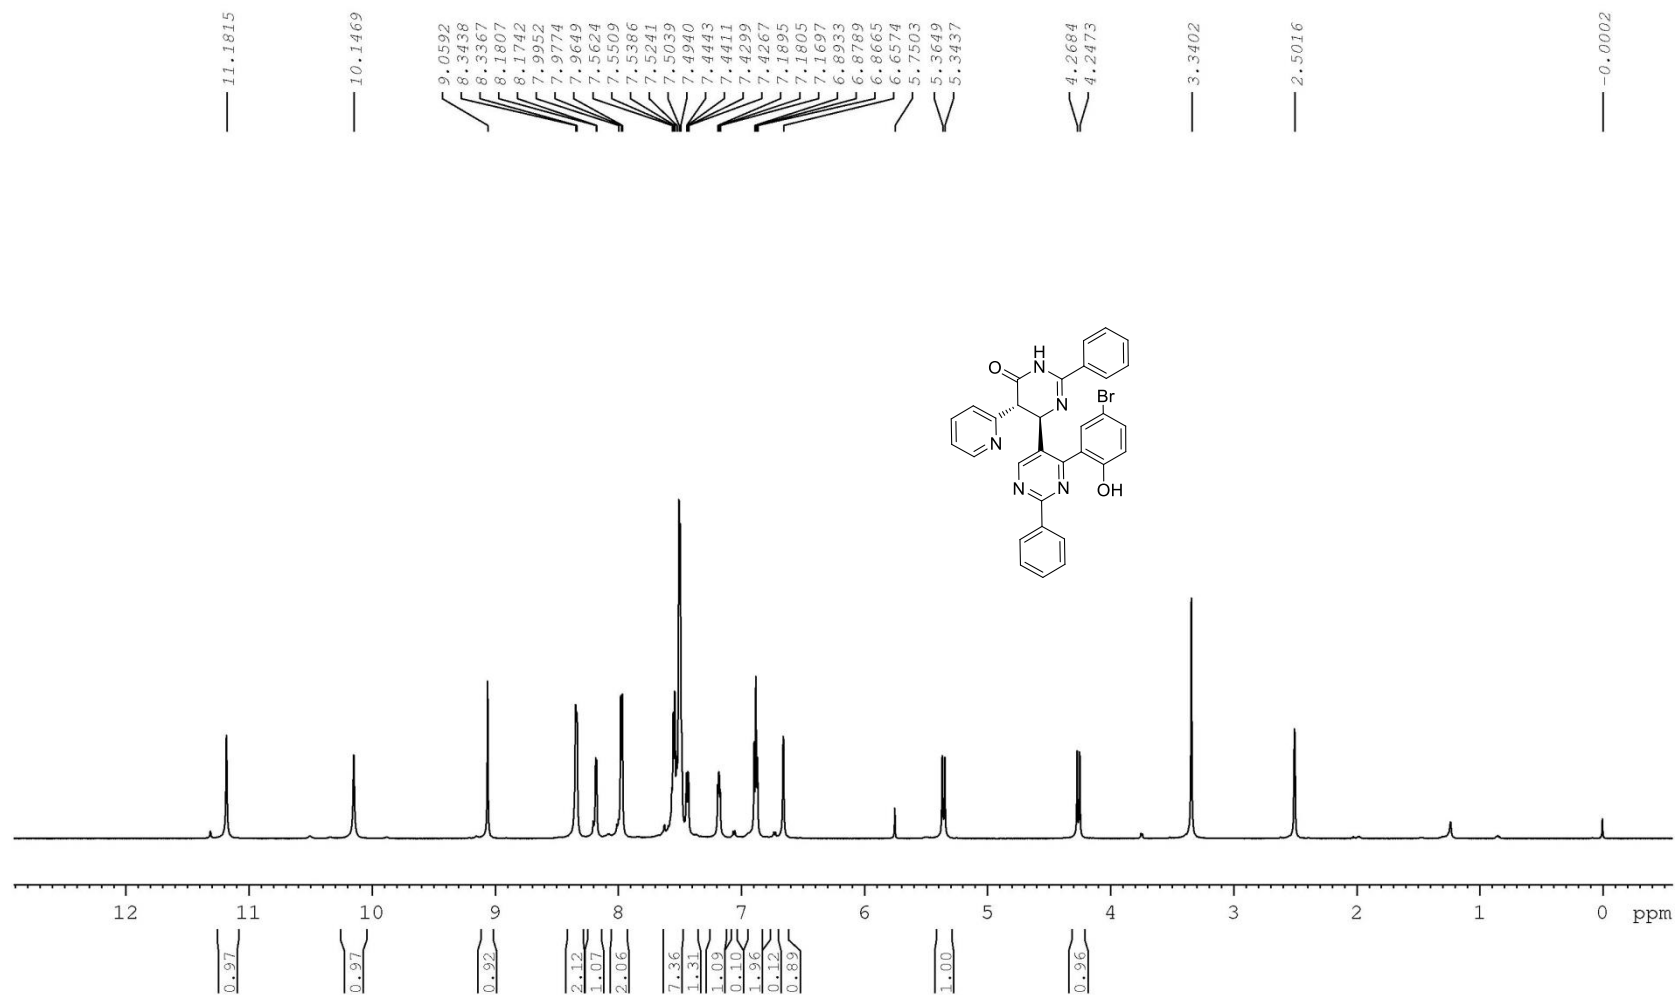

Figure S7. <sup>1</sup>H NMR (600 MHz, DMSO-*d*<sub>6</sub>) spectra of compound 4c

DEPT135

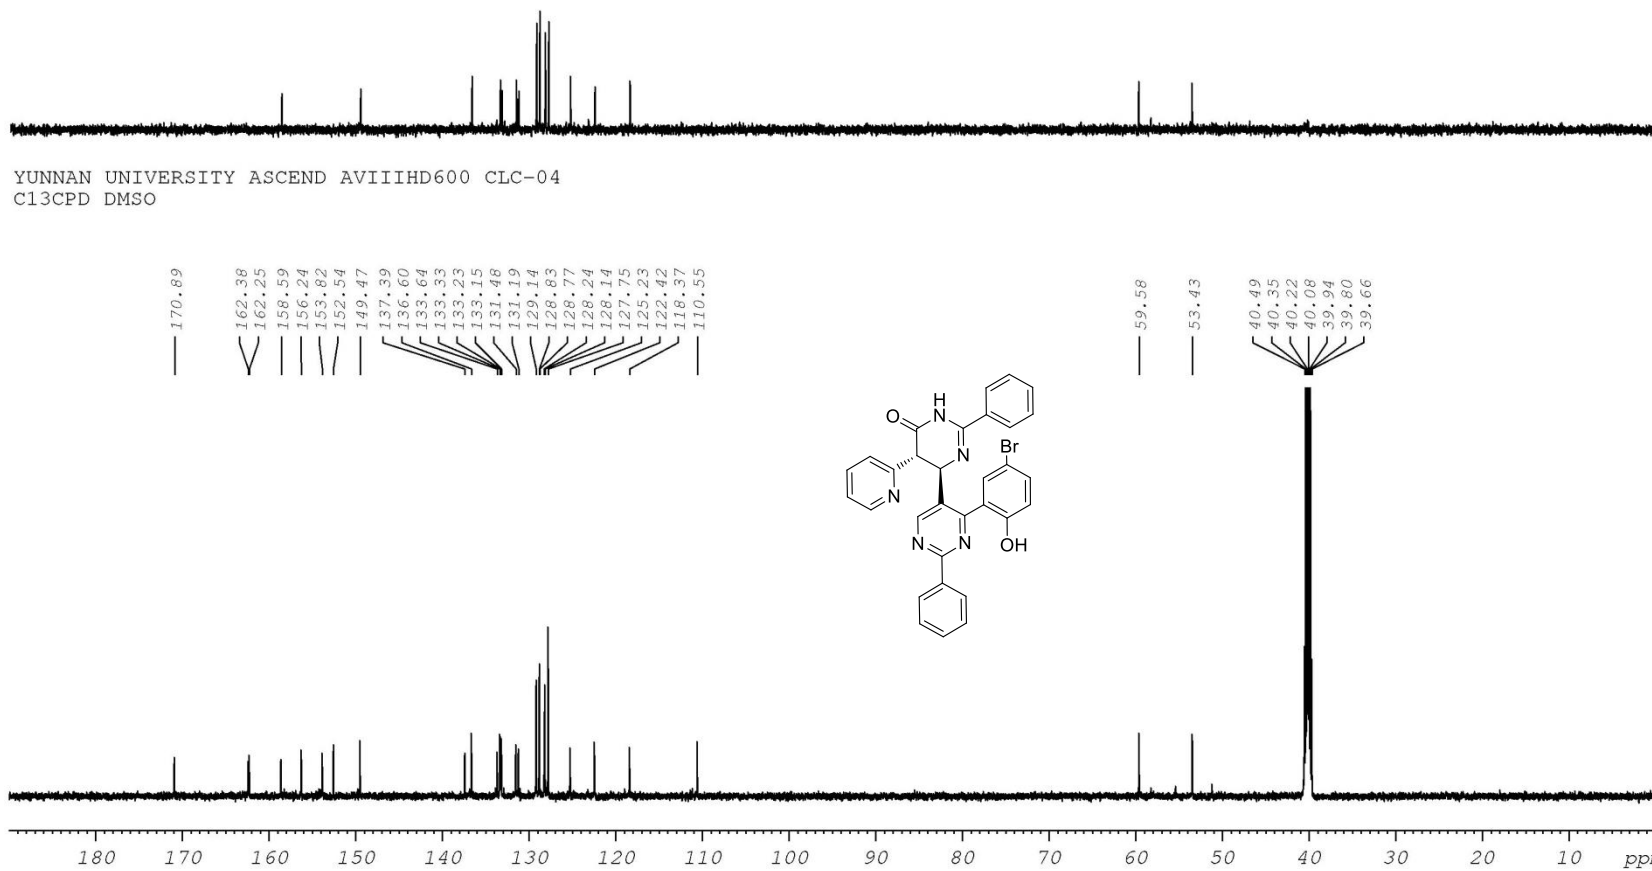

Figure S8.  $^{13}\text{C}$  NMR (150 MHz,  $\text{DMSO-}d_6$ ) spectra of compound **4c**



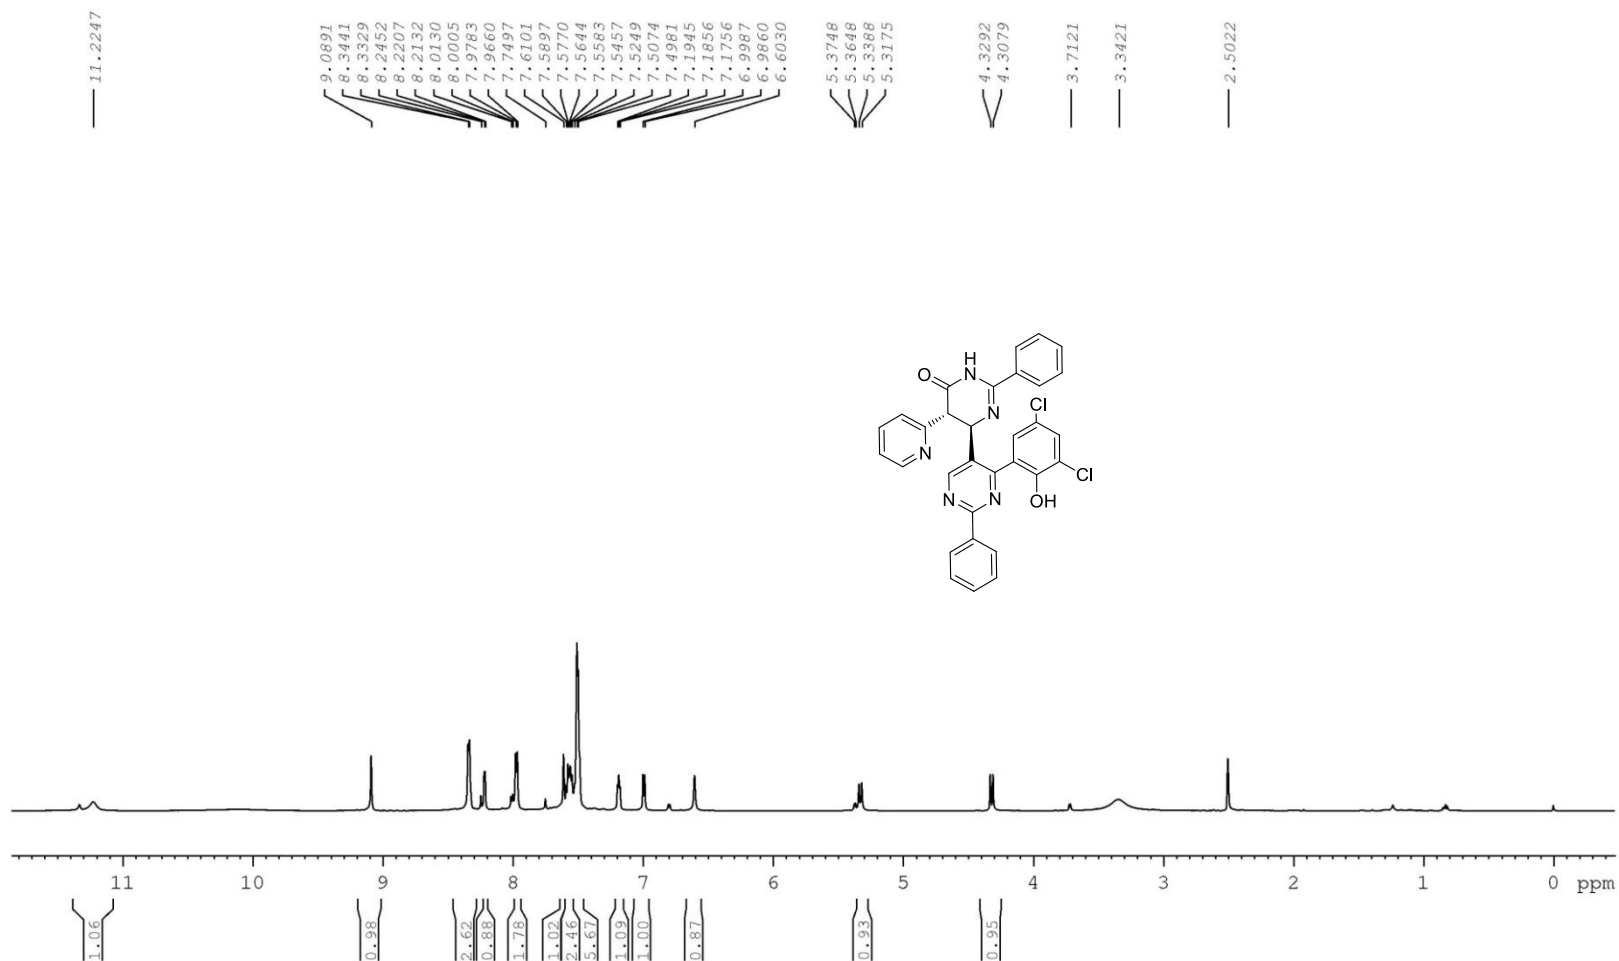

**Figure S9.**  $^1\text{H}$  NMR (600 MHz,  $\text{DMSO-}d_6$ ) spectra of compound **4d**

DEPT135

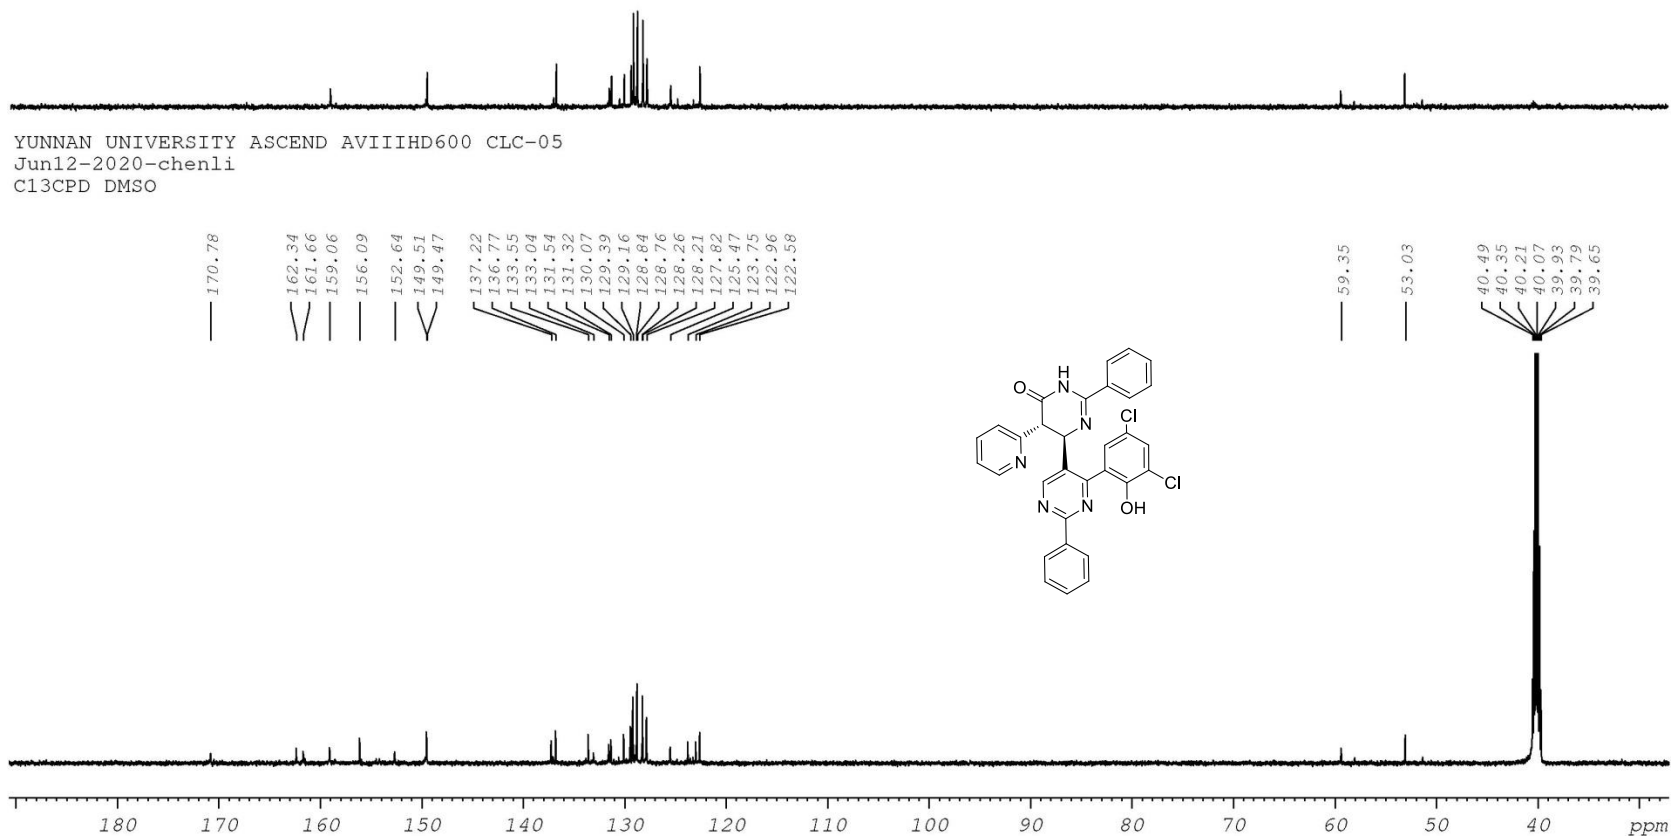

Figure S10.  $^{13}\text{C}$  NMR (150 MHz,  $\text{DMSO-}d_6$ ) spectra of compound **4d**

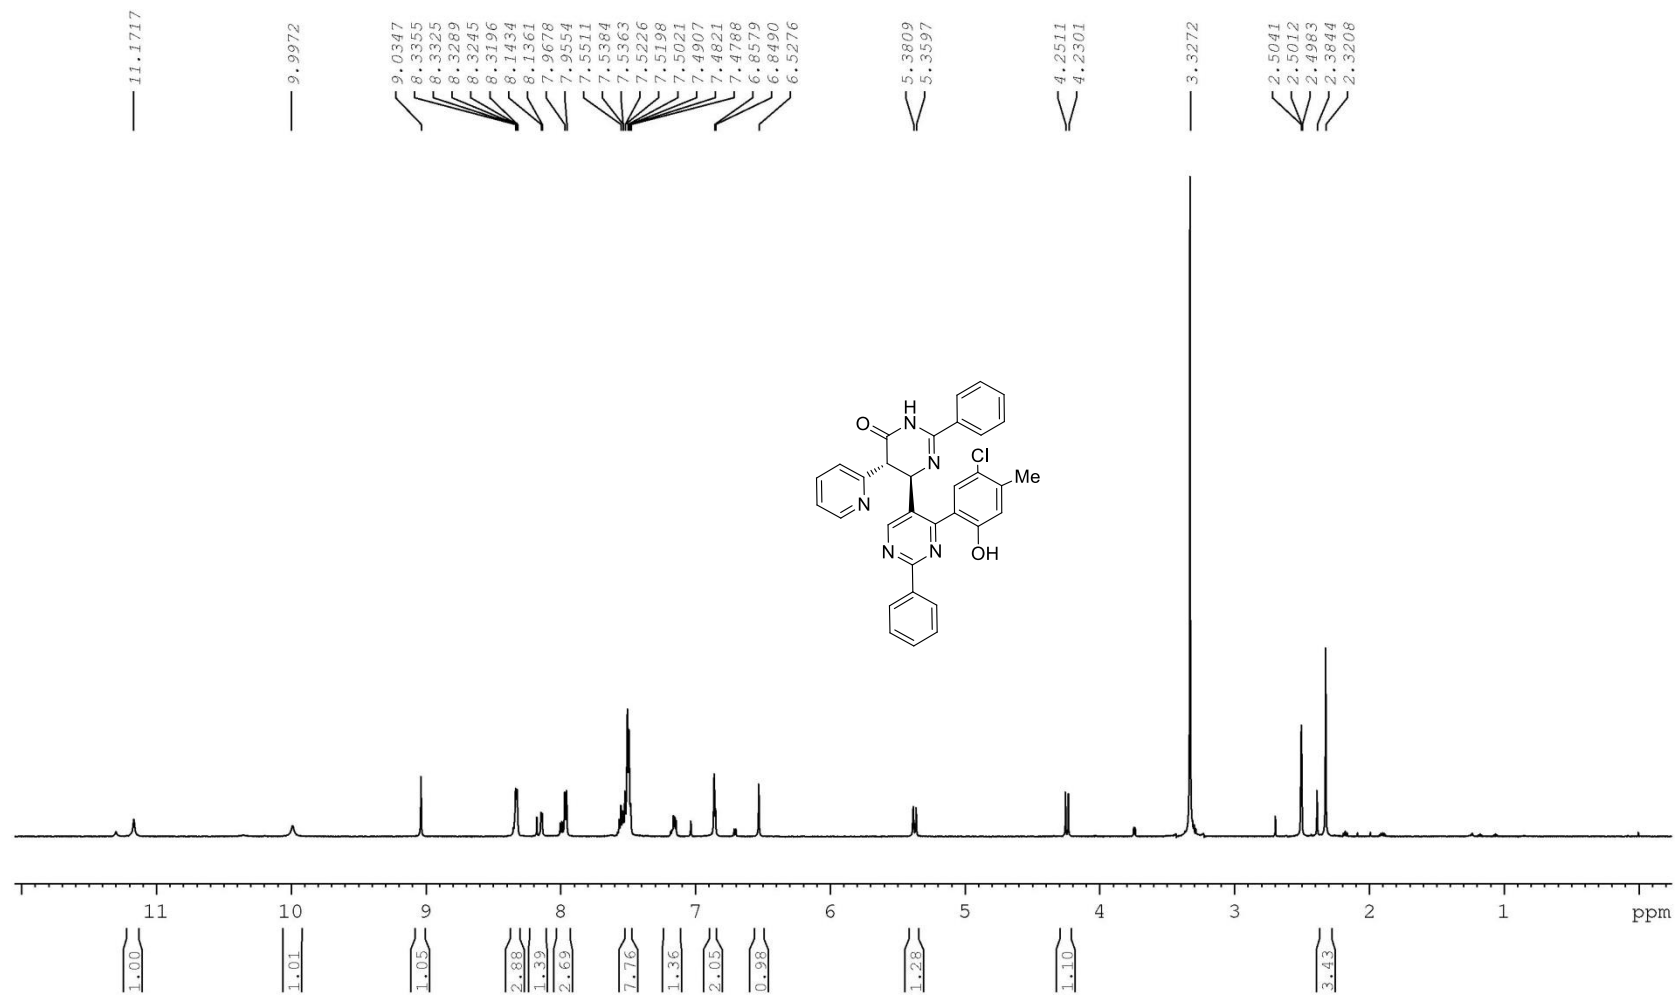

**Figure S11.**  $^1\text{H}$  NMR (600 MHz,  $\text{DMSO-}d_6$ ) spectra of compound **4e**

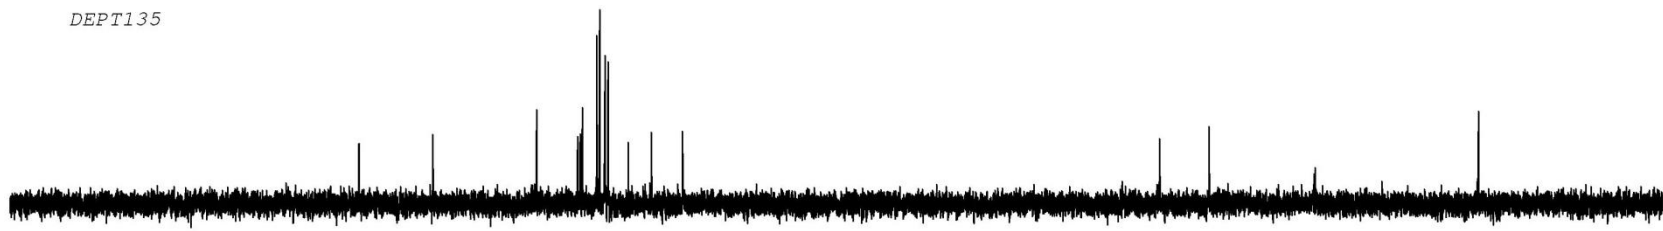

YUNNAN UNIVERSITY ASCEND AVIIIHD600 CLC-14  
 Jul27-2020-chenli  
 C13CPD DMSO

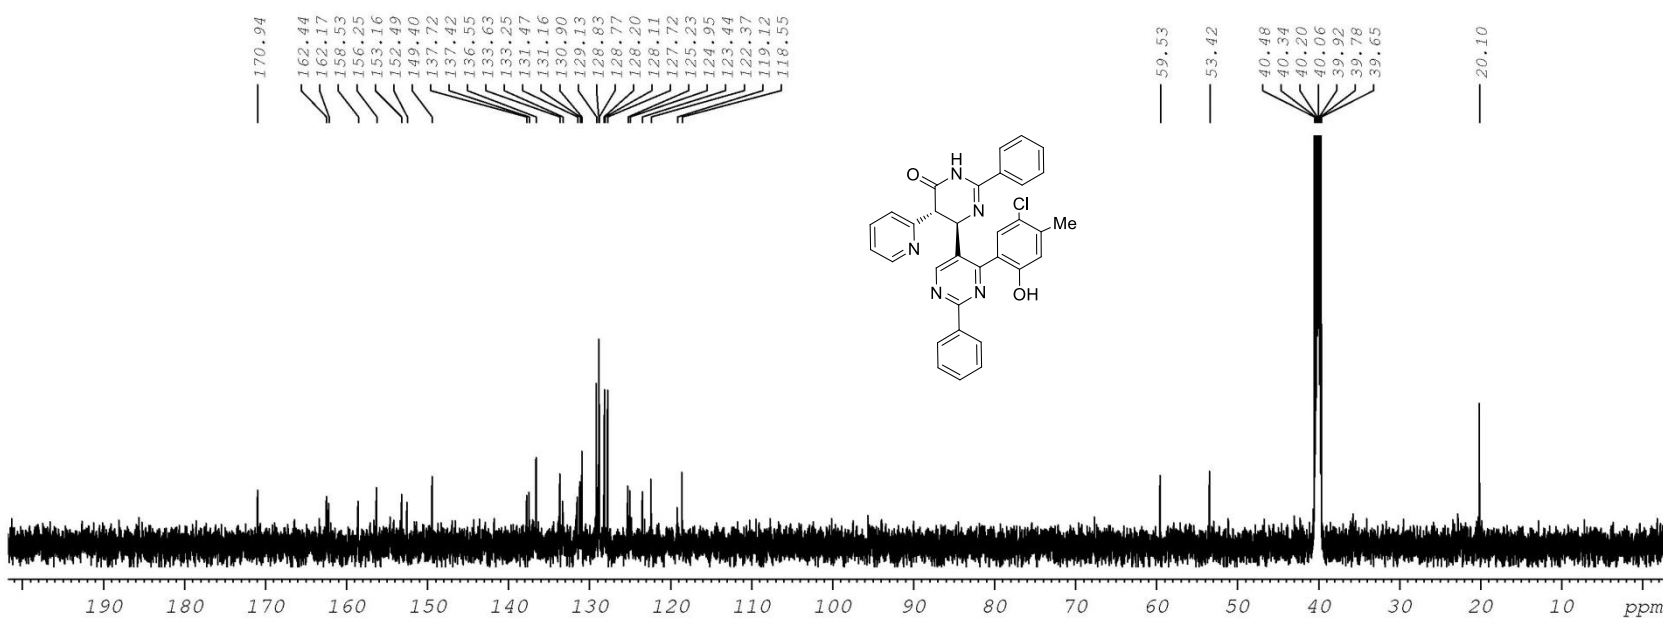

Figure S12. <sup>13</sup>C NMR (150 MHz, DMSO-*d*<sub>6</sub>) spectra of compound 4e

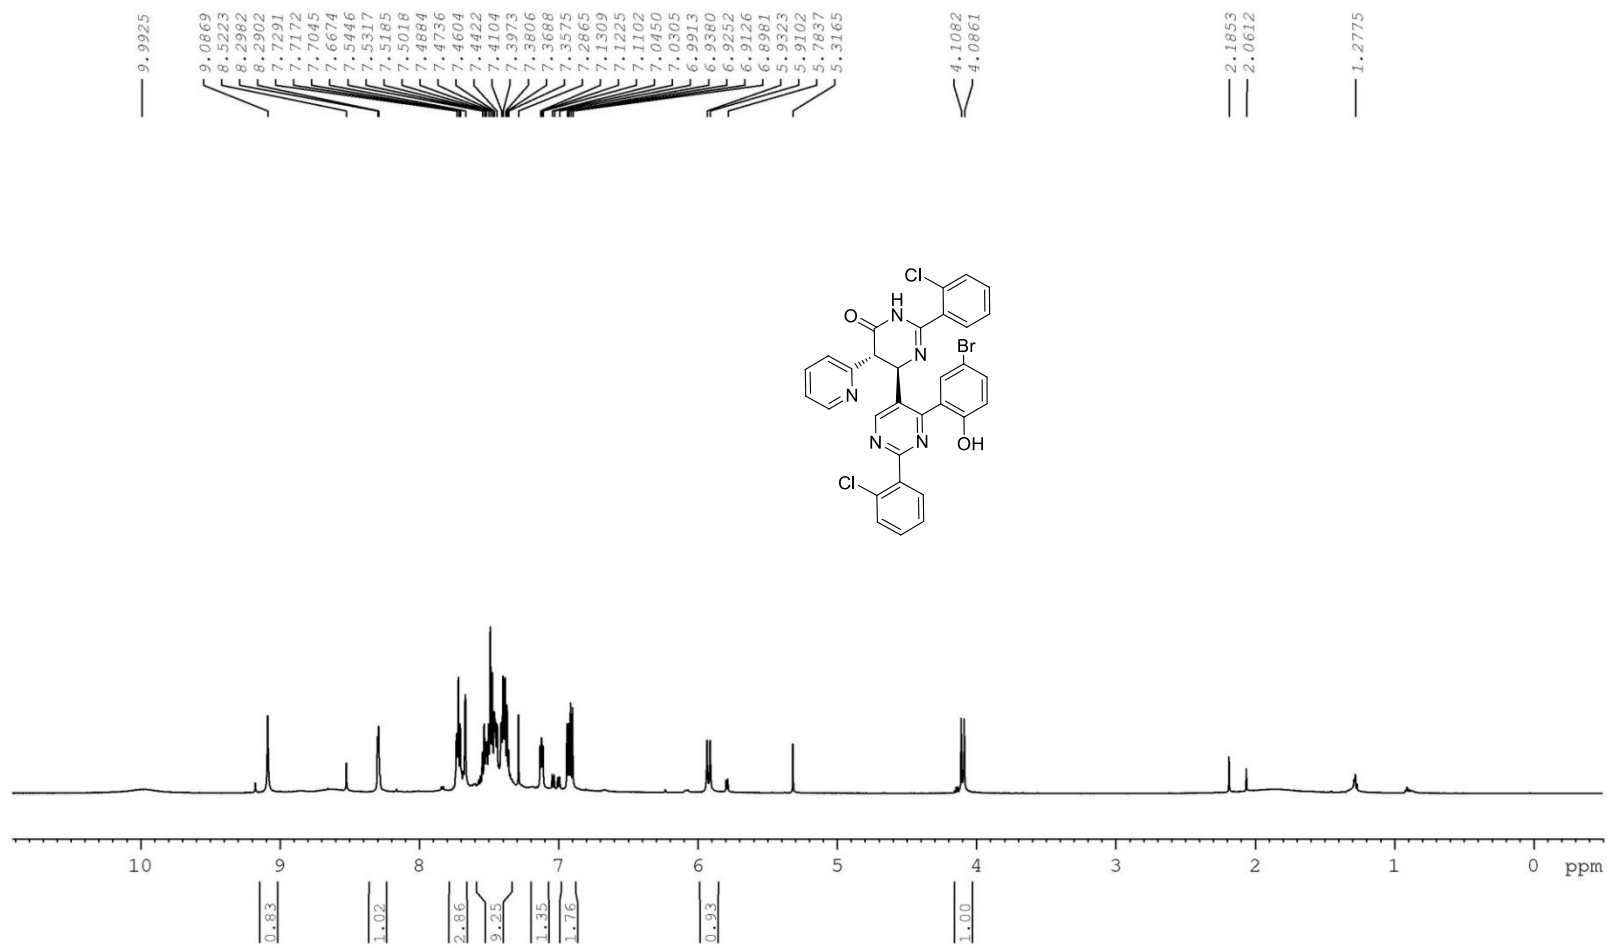

Figure S13.  $^1\text{H NMR}$  (600 MHz,  $\text{CDCl}_3$ ) spectra of compound **4f**

DEPT135

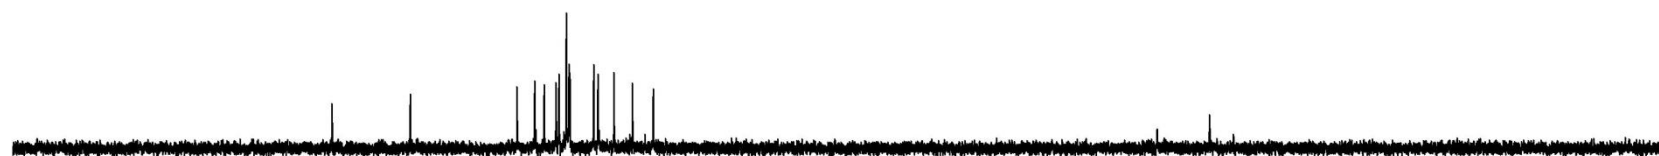

YUNNAN UNIVERSITY ASCEND AVIIIHD600 CLC-07  
Jul10-2020-chenli  
C13CPD CDCl3

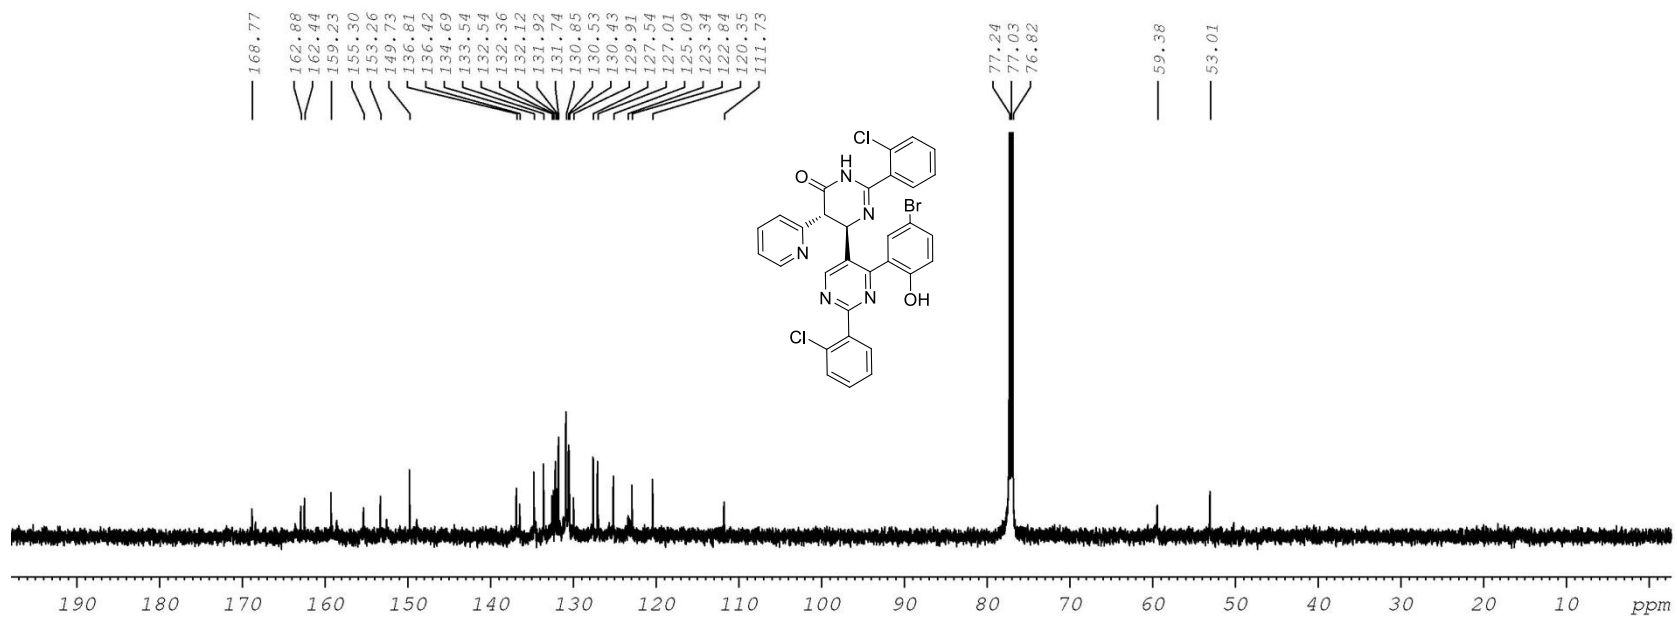

Figure S14.  $^{13}\text{C}$  NMR (150 MHz,  $\text{CDCl}_3$ ) spectra of compound 4f

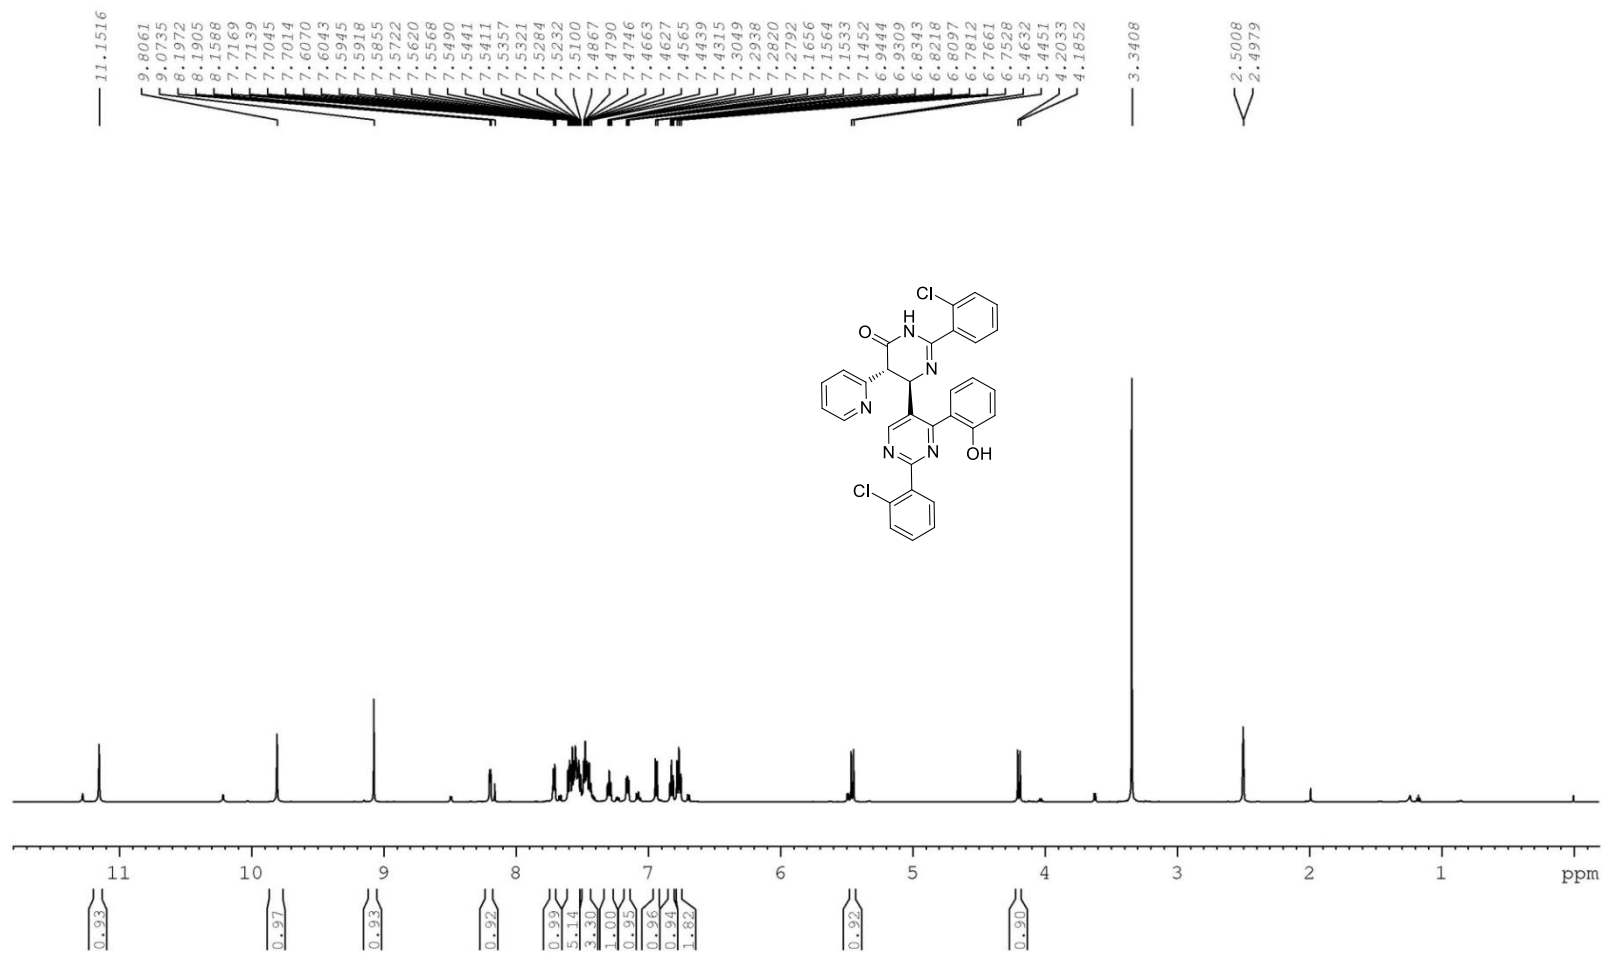

DEPT135

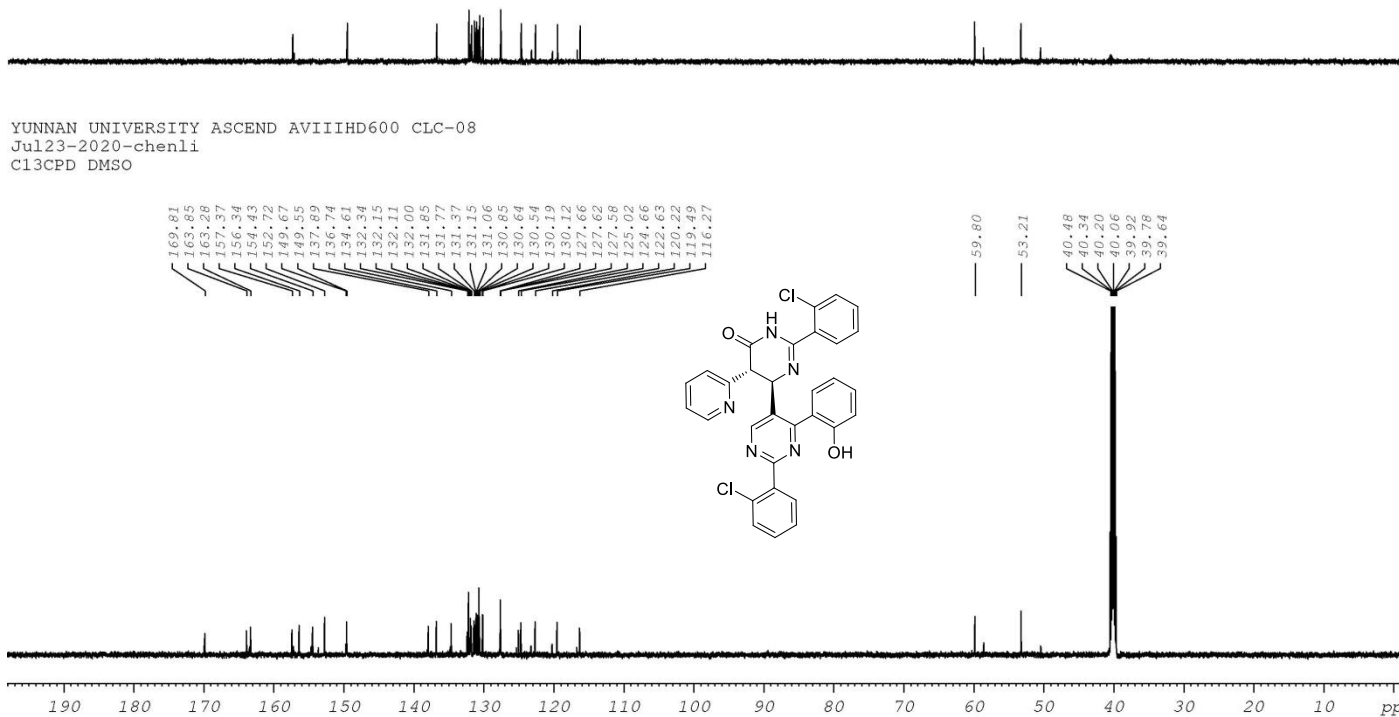

Figure S16.  $^{13}\text{C}$  NMR (150 MHz,  $\text{DMSO-}d_6$ ) spectra of compound **4g**



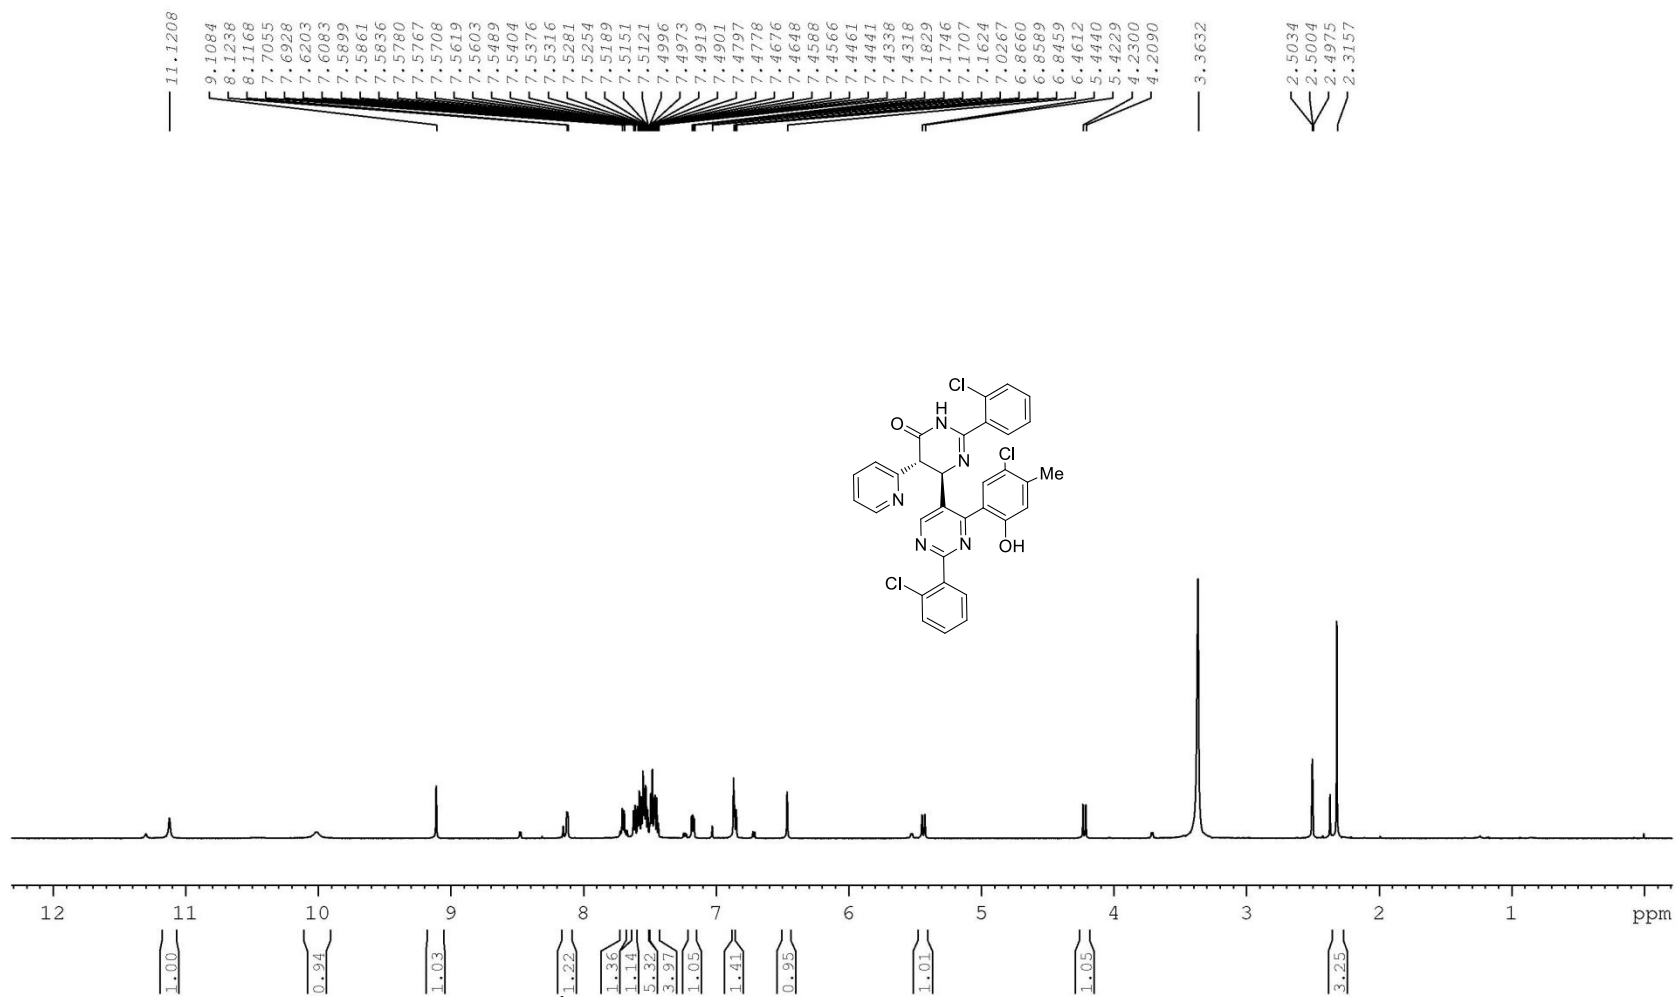

DEPT135

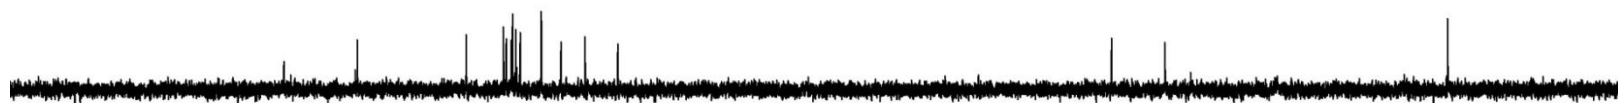

YUNNAN UNIVERSITY ASCEND AVIIIHD600 CLC-10  
Jul17-2020-chenli  
C13CPD DMSO

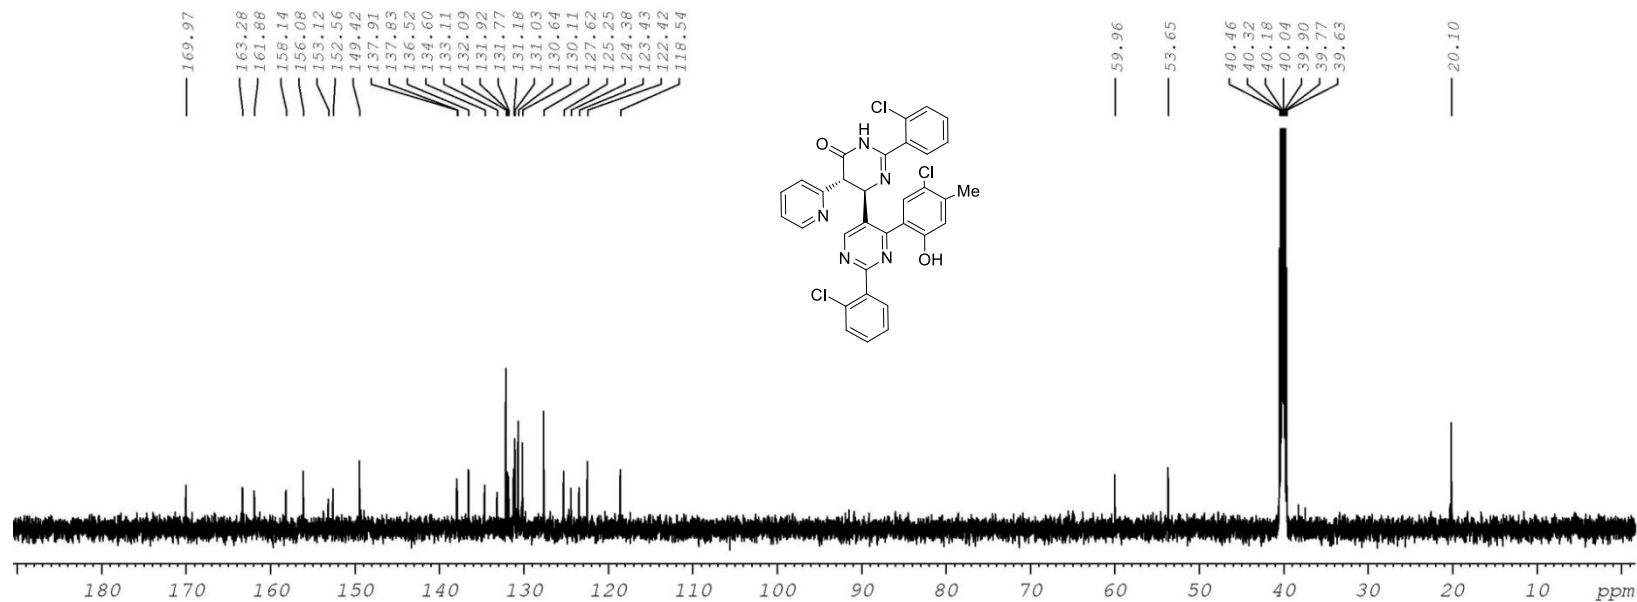

Figure S18.  $^{13}\text{C}$  NMR (150 MHz,  $\text{DMSO-}d_6$ ) spectra of compound 4h

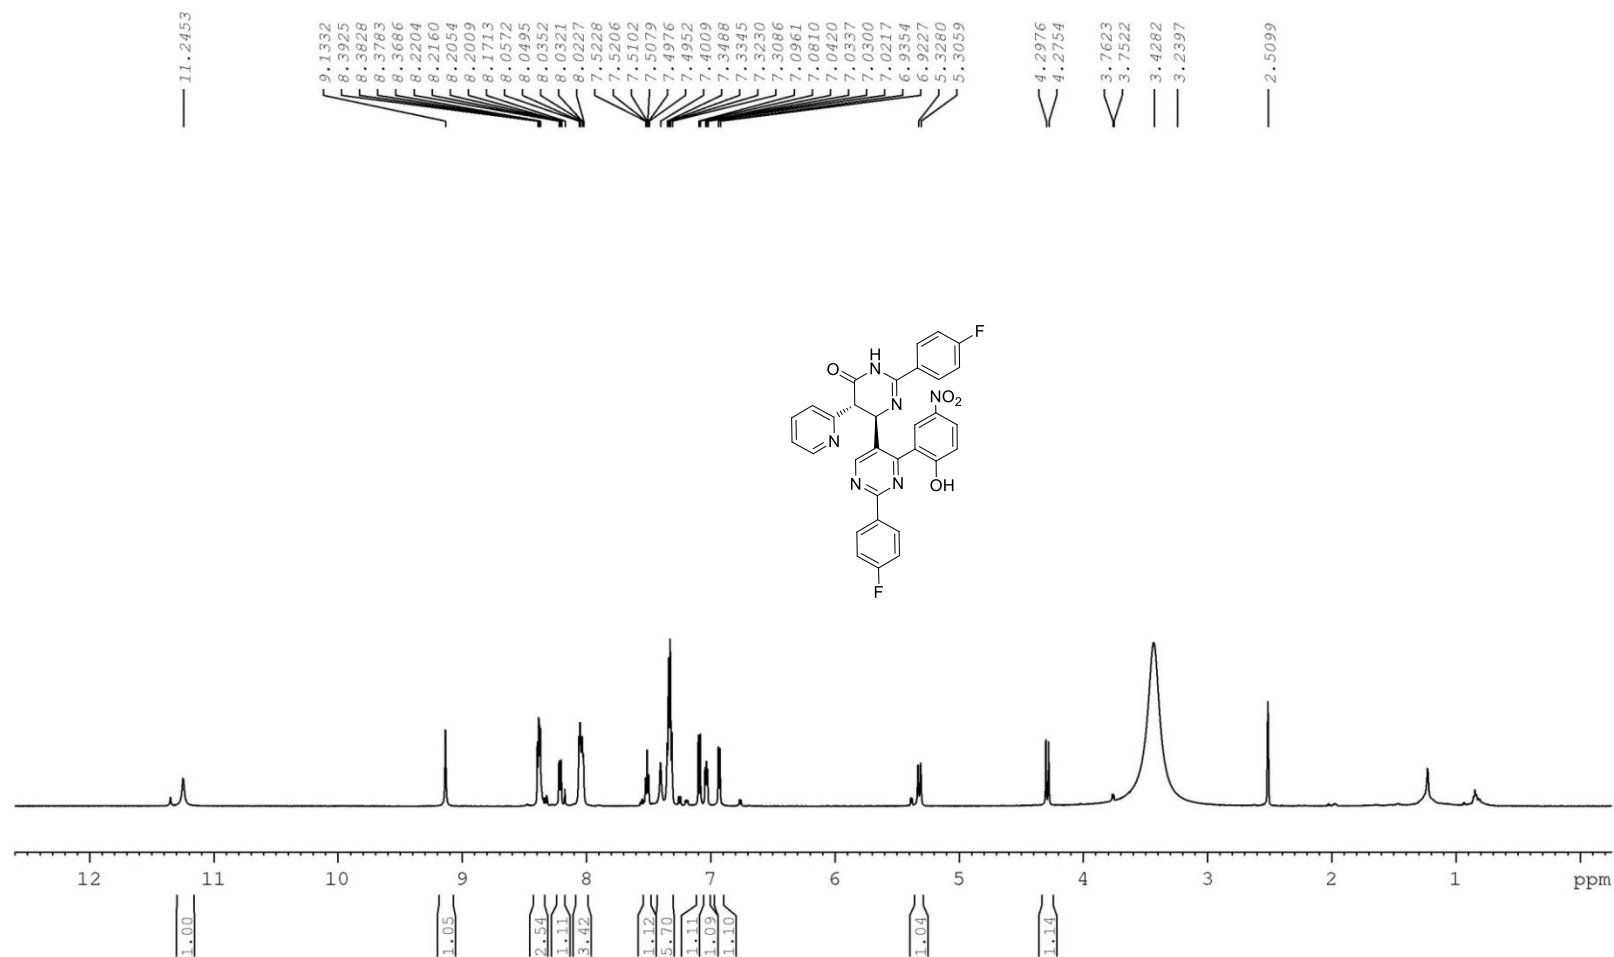

**Figure S19.** <sup>1</sup>H NMR (600 MHz, DMSO-*d*<sub>6</sub>) spectra of compound **4i**

DEPT135

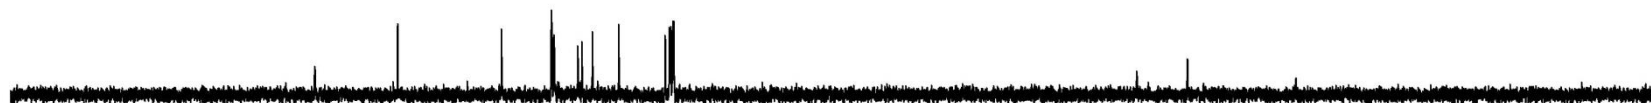

YUNNAN UNIVERSITY ASCEND AVIIIHD600 CLC-22  
Nov09-2020-chenli  
C13CPD DMSO

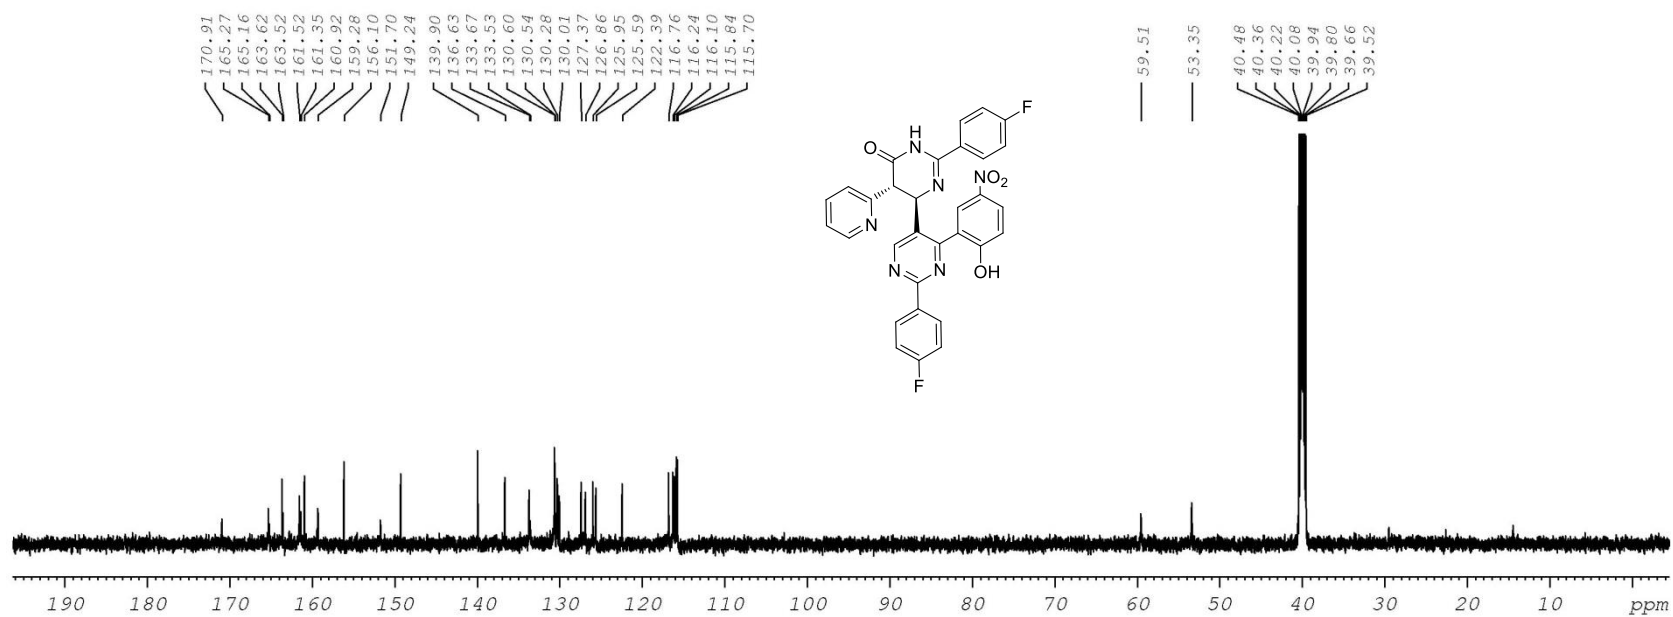

Figure S20.  $^{13}\text{C}$  NMR (150 MHz,  $\text{DMSO-}d_6$ ) spectra of compound **4i**

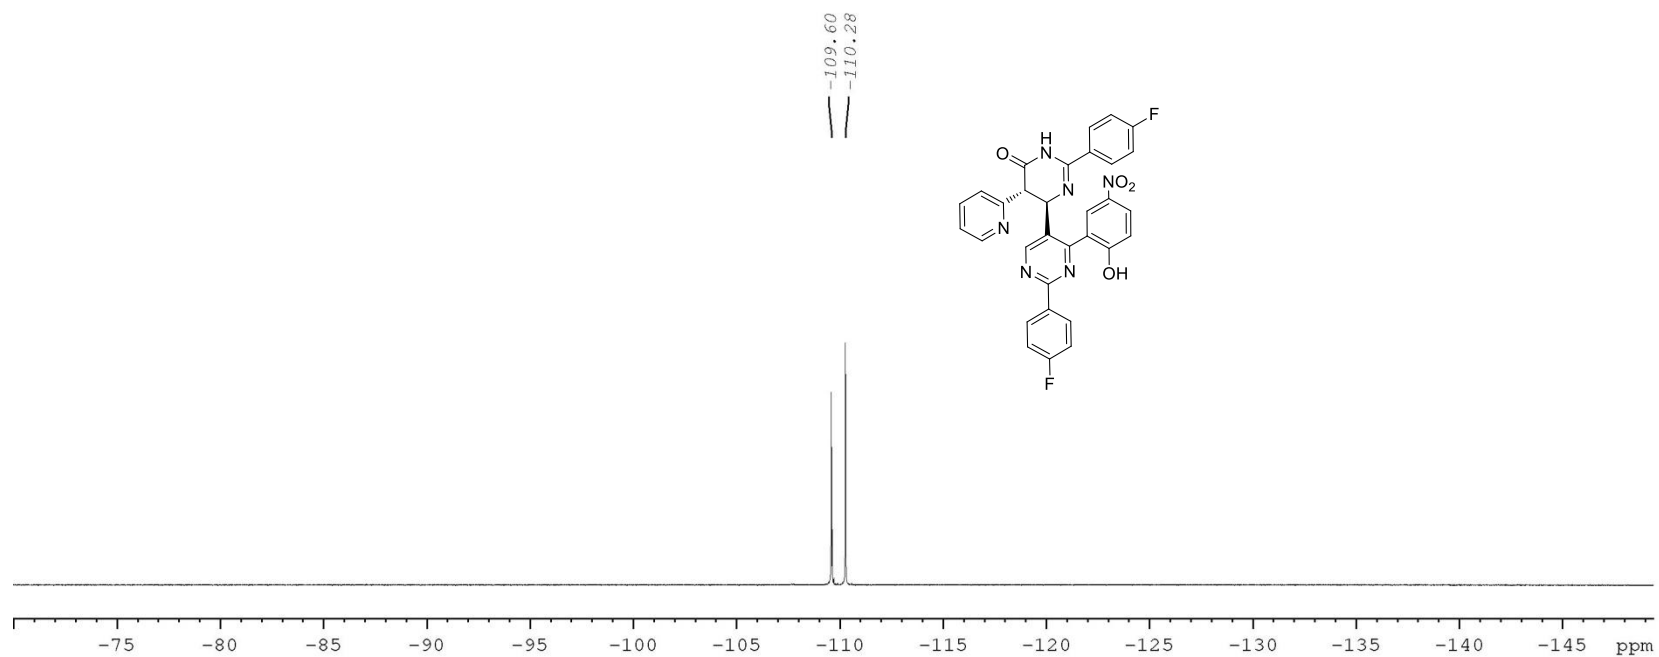

**Figure S21.**  $^{19}\text{F}$  NMR (564 MHz,  $\text{DMSO-}d_6$ ) spectra of compound **4i**

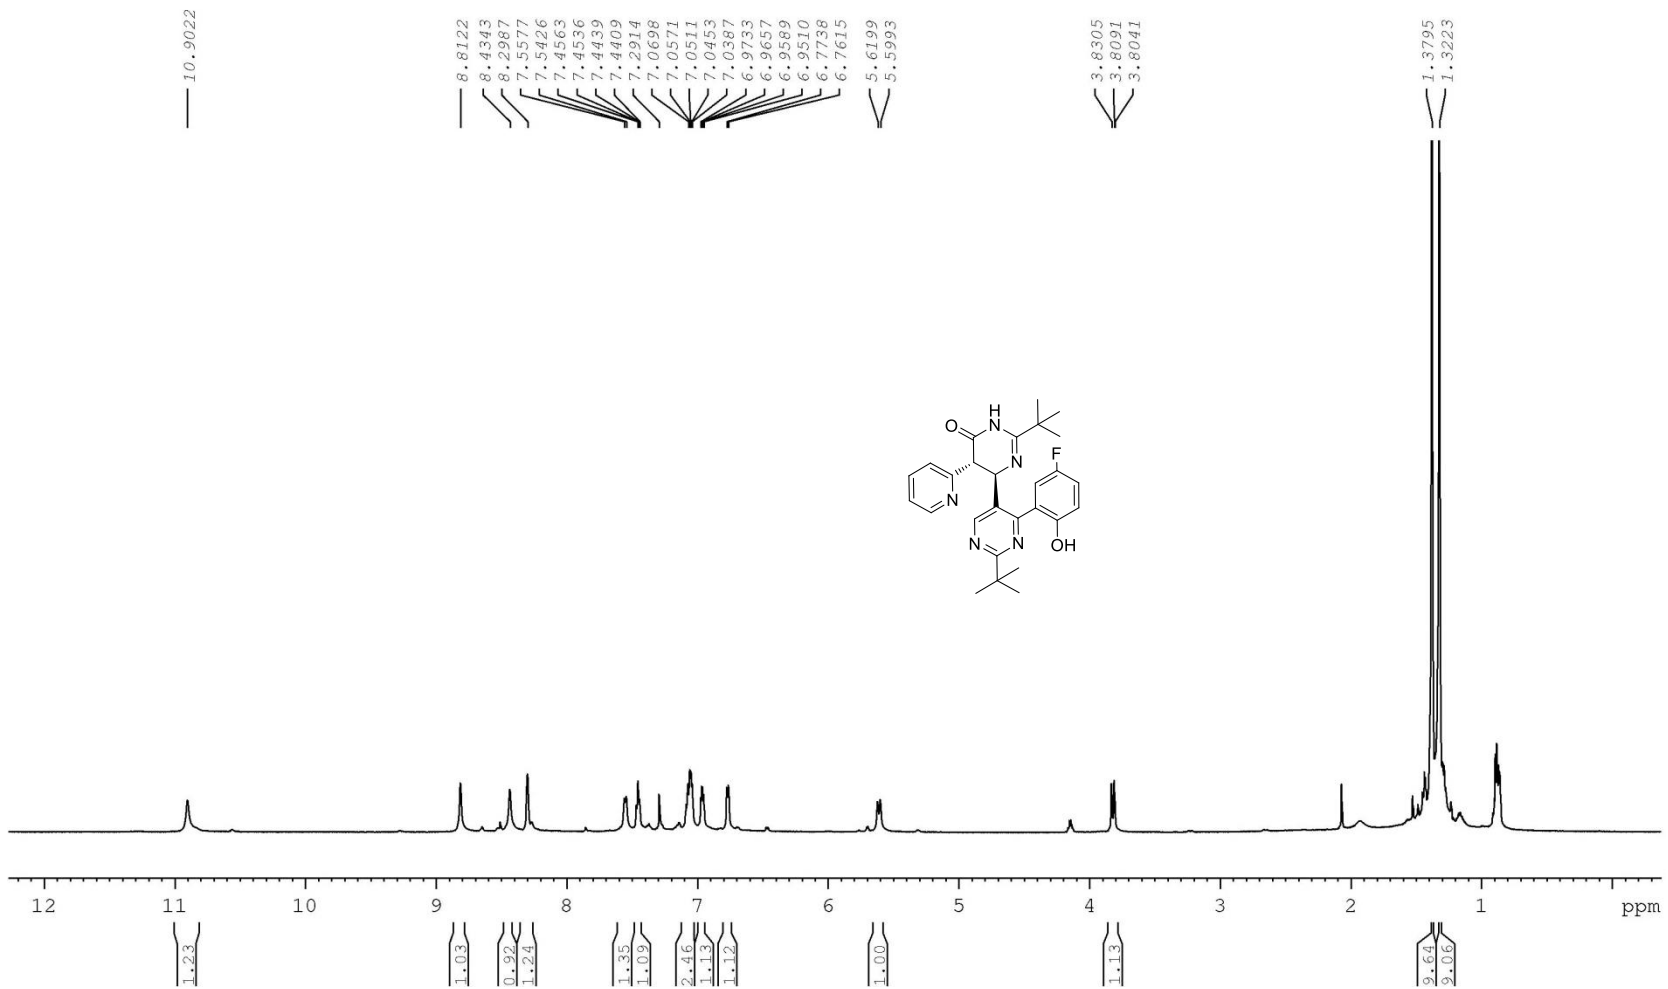

Figure S22.  $^1\text{H NMR}$  (600 MHz,  $\text{CDCl}_3$ ) spectra of compound **4j**

DEPT135

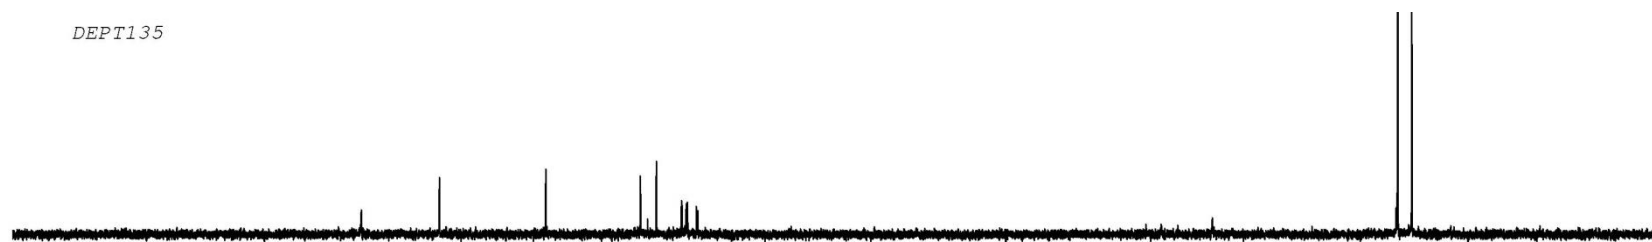

YUNNAN UNIVERSITY ASCEND AVIIIHD600 CLC-06  
Jun14-2021-chenli  
C13CPD CDCl3

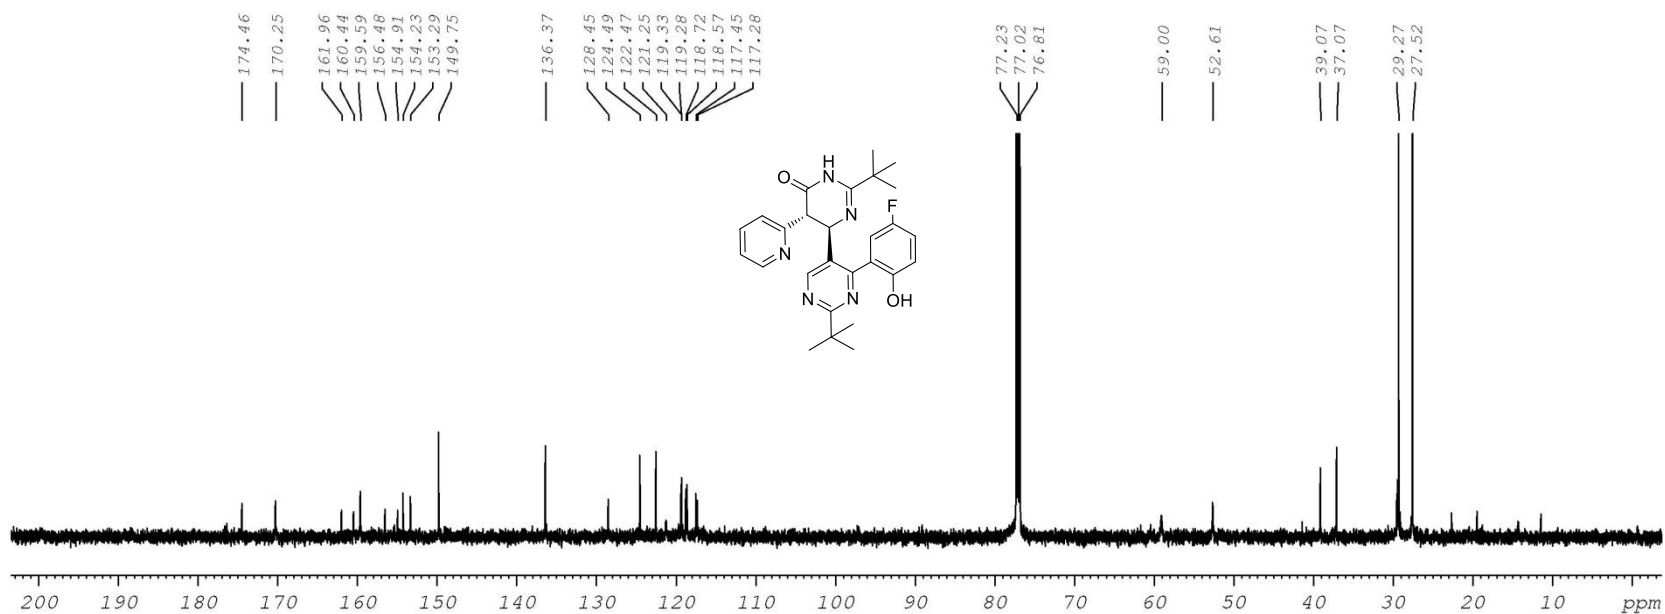

Figure S23.  $^{13}\text{C}$  NMR (150 MHz,  $\text{CDCl}_3$ ) spectra of compound 4j

YUNNAN UNIVERSITY ASCEND AVIIIHD600 CLC-06  
Jun14-2021-chenli  
F19CPD CDCl3

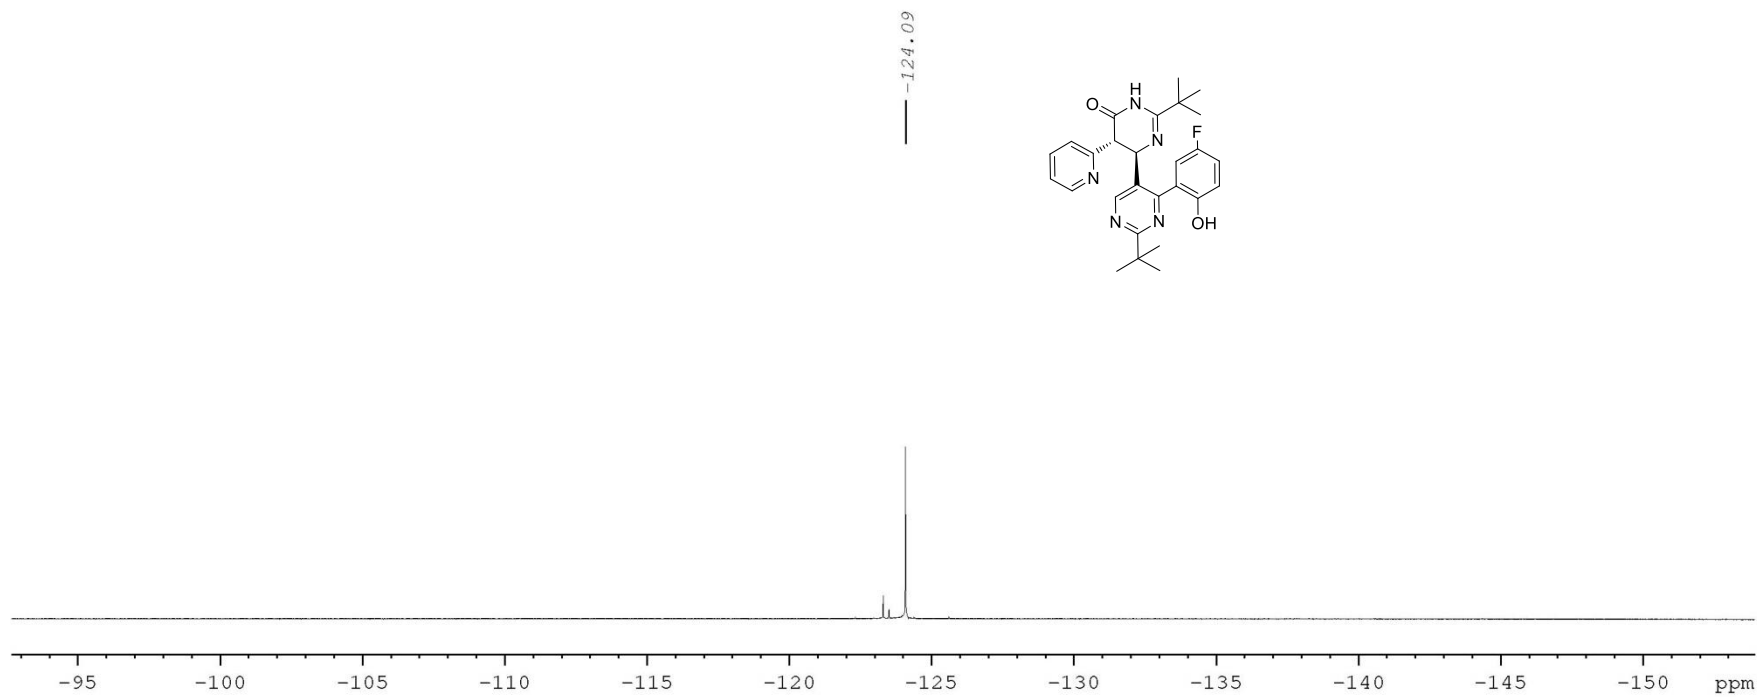

**Figure S24.**  $^{19}\text{F}$  NMR (564 MHz,  $\text{CDCl}_3$ ) spectra of compound **4j**



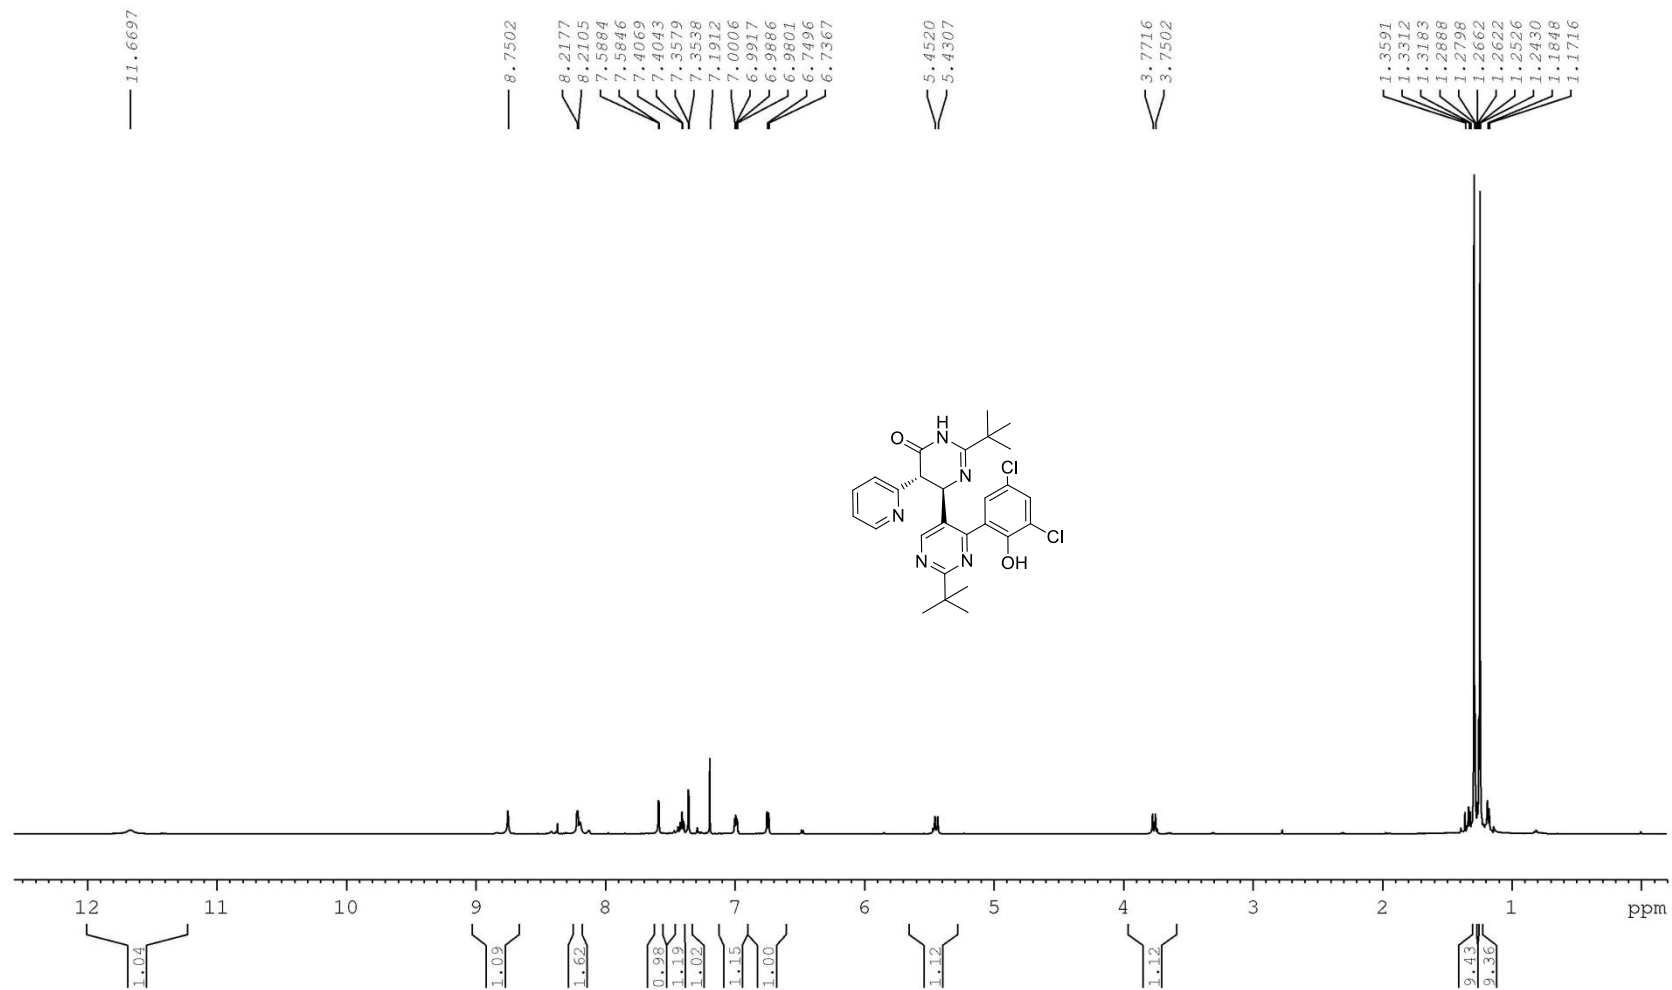

Figure S25.  $^1\text{H NMR}$  (600 MHz,  $\text{CDCl}_3$ ) spectra of compound **4k**

DEPT135

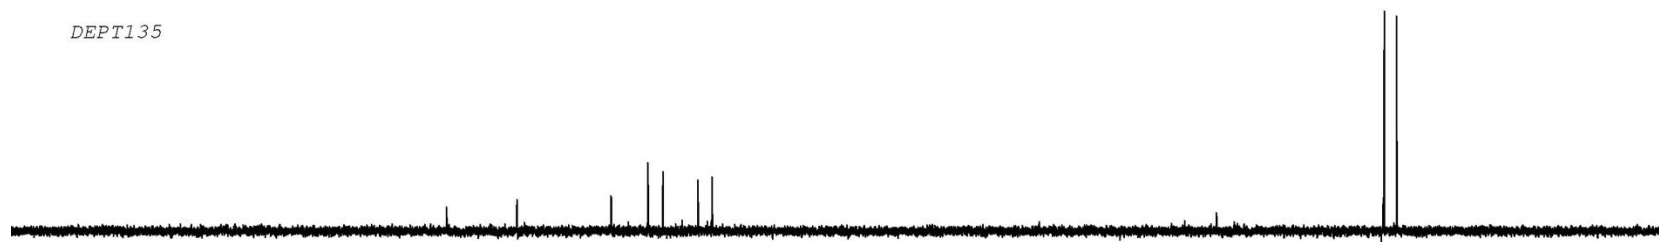

YUNNAN UNIVERSITY ASCEND AVIIIHD600 CLC-18  
Aug05-2020-chenli  
C13CPD CDC13

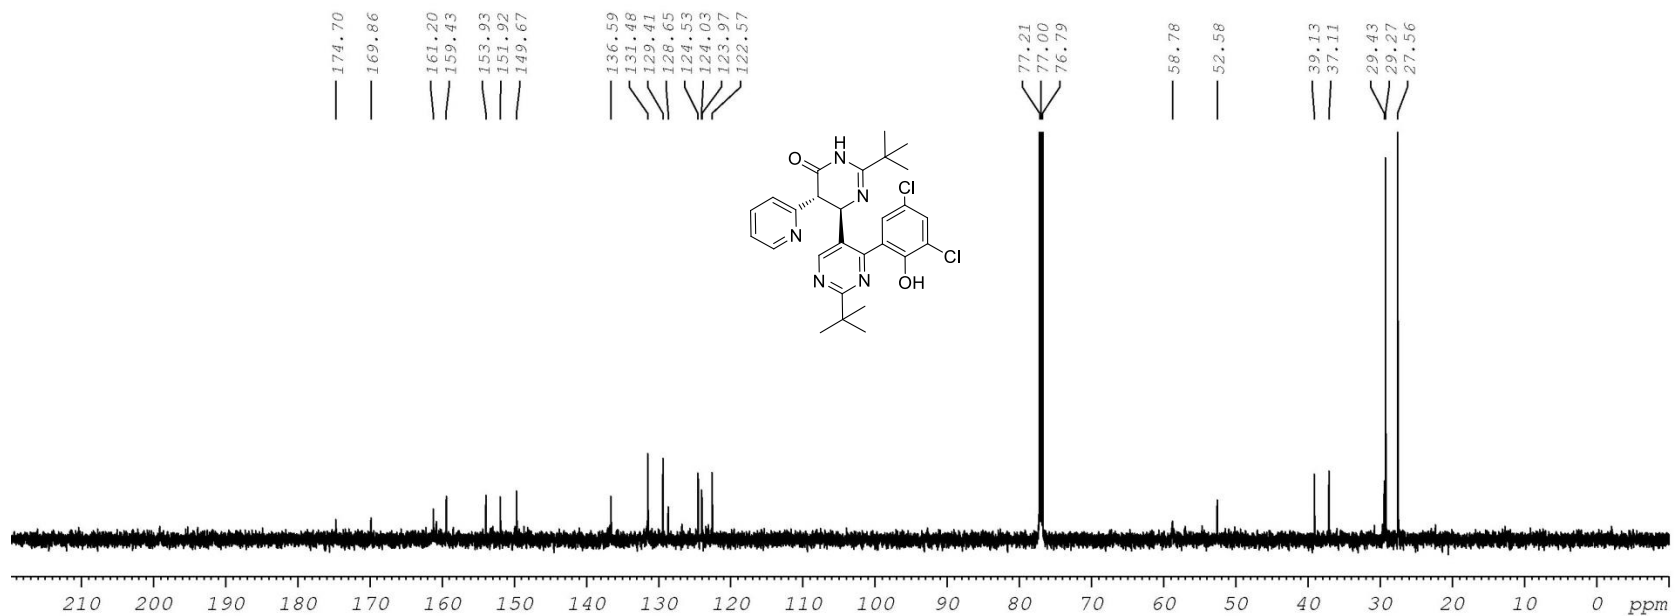

Figure S26.  $^{13}\text{C}$  NMR (150 MHz,  $\text{CDCl}_3$ ) spectra of compound **4k**

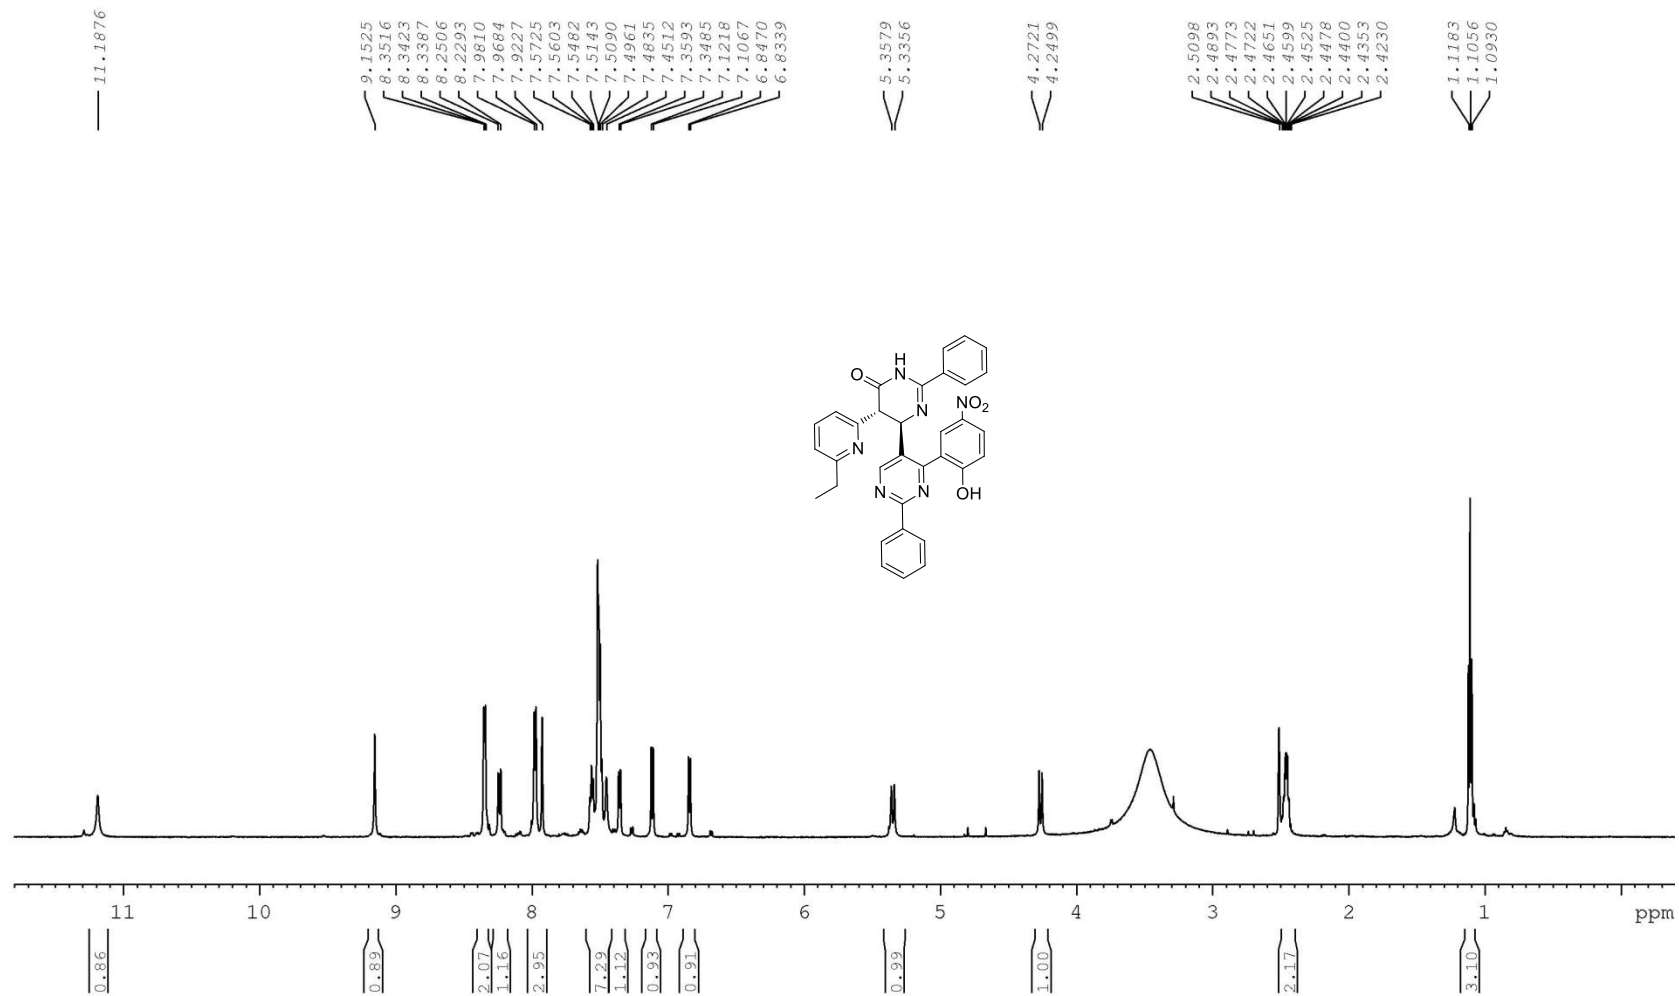

Figure S27.  $^1\text{H}$  NMR (600 MHz,  $\text{DMSO-}d_6$ ) spectra of compound 4l

DEPT135

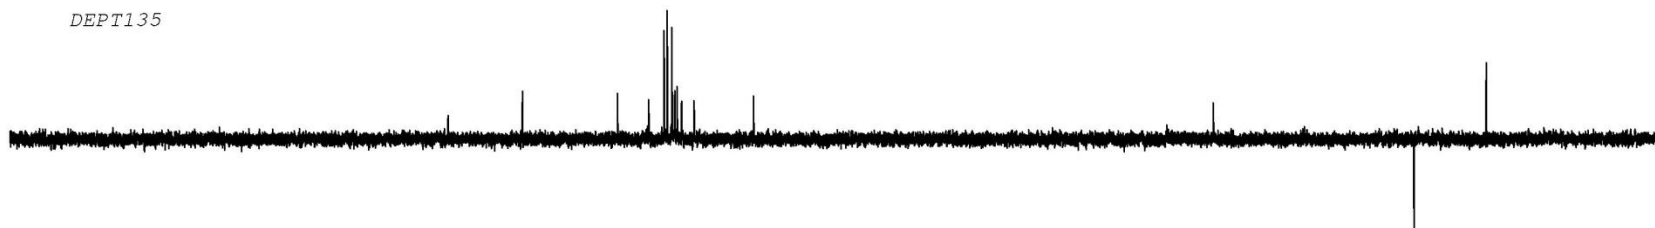

YUNNAN UNIVERSITY ASCEND AVIIIHD600 CLC-09-3  
Nov09-2020-chenli  
C13CPD DMSO

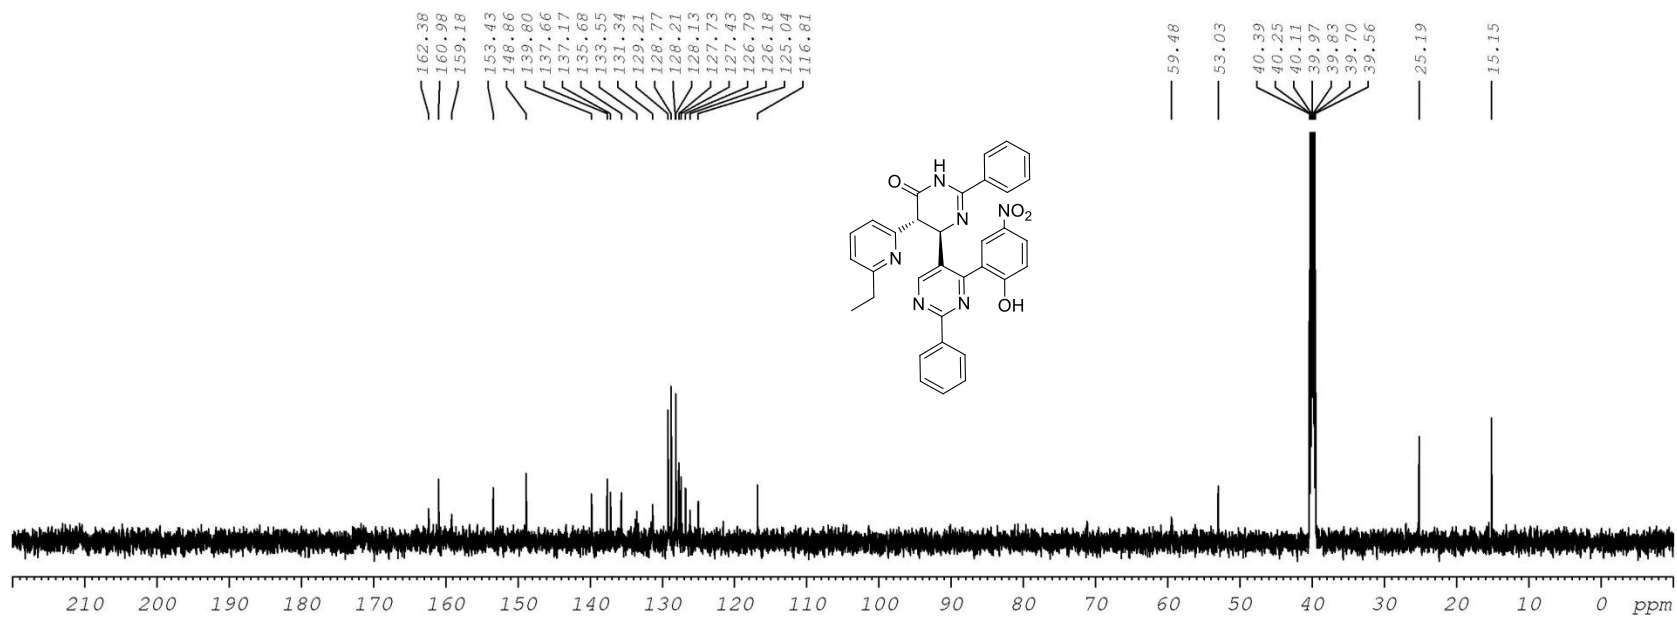

Figure S28. <sup>13</sup>C NMR (150 MHz, DMSO-*d*<sub>6</sub>) spectra of compound 41

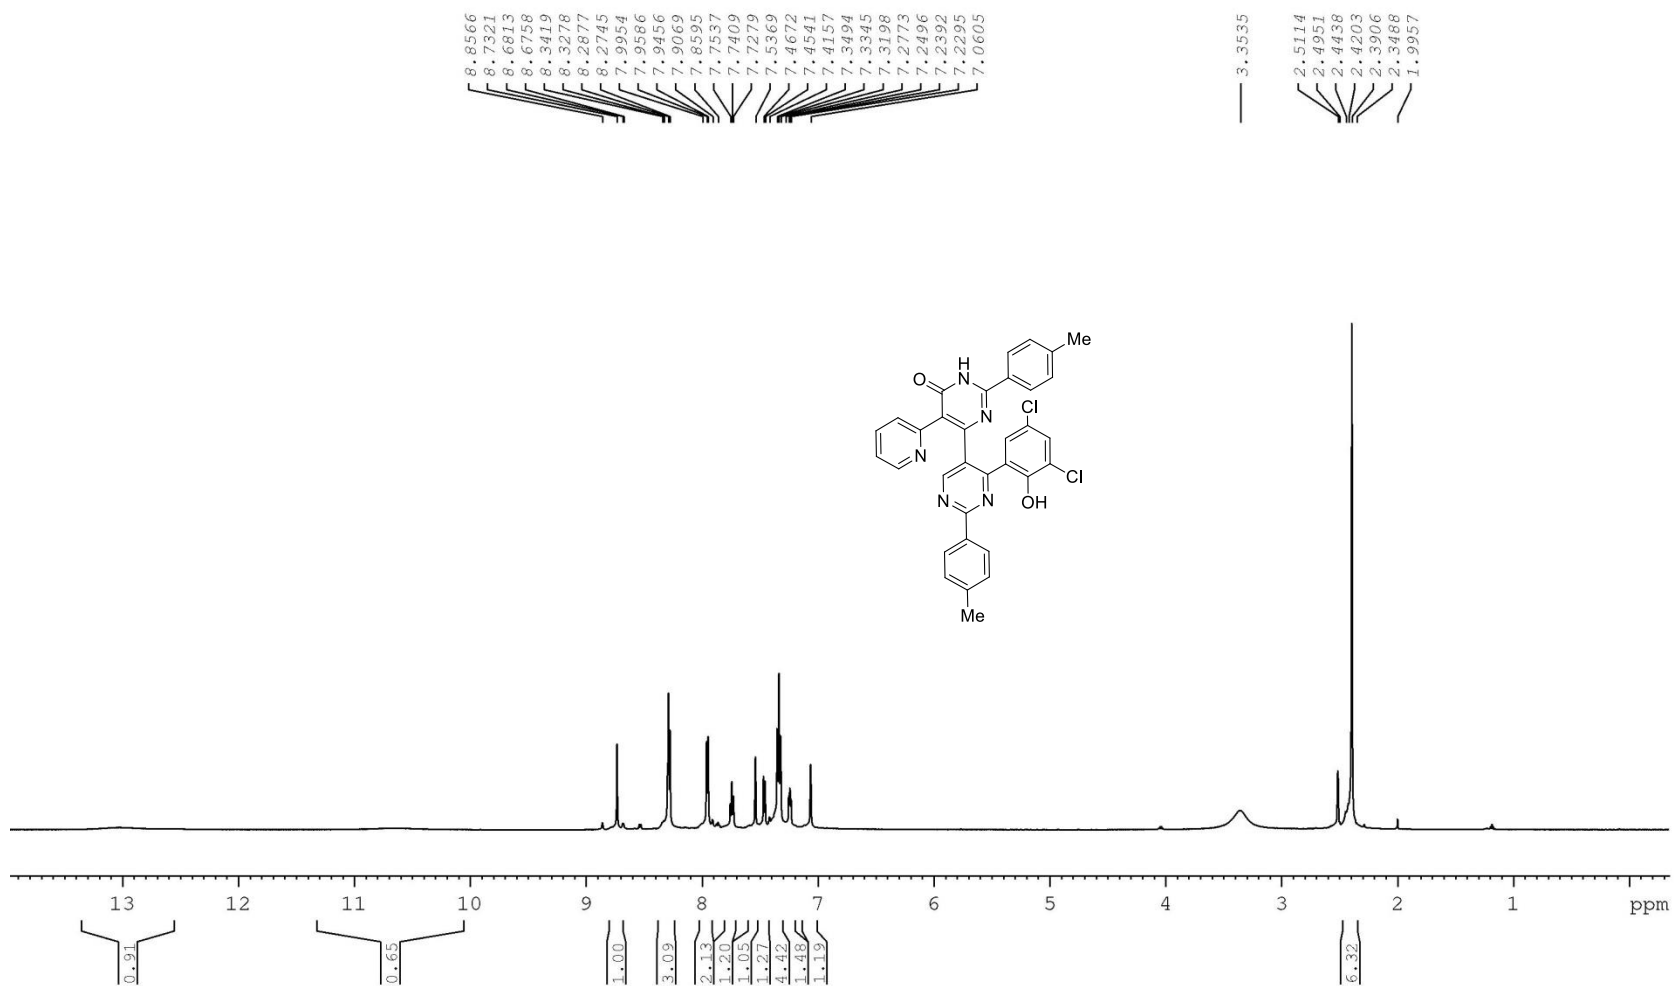

**Figure S29.** <sup>1</sup>H NMR (600 MHz, DMSO-*d*<sub>6</sub>) spectra of compound **5a**

DEPT135

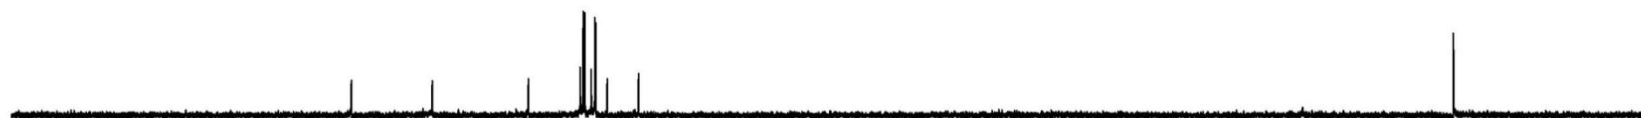

YUNNAN UNIVERSITY ASCEND AVIIIHD600 CLC-20-2  
Aug31-2020-chenli  
C13CPD DMSO

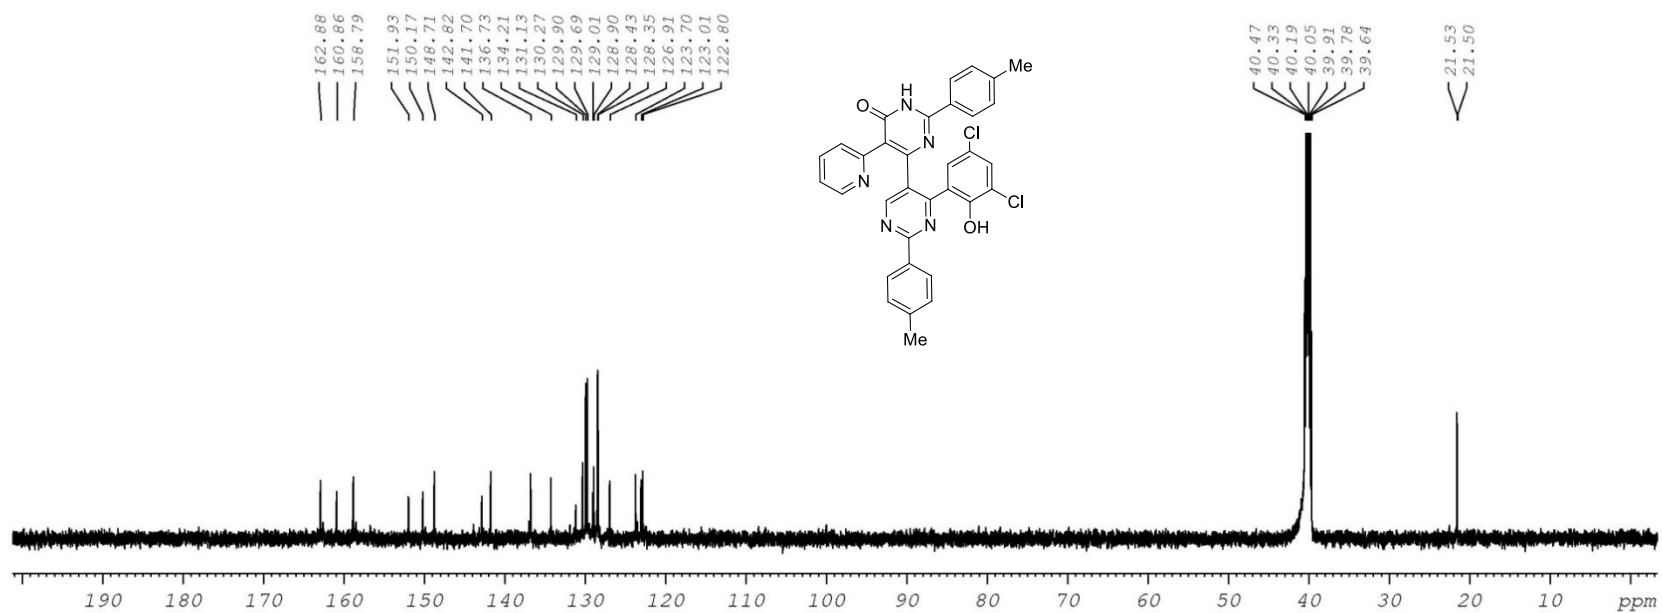

Figure S30.  $^{13}\text{C}$  NMR (150 MHz,  $\text{DMSO-}d_6$ ) spectra of compound **5a**

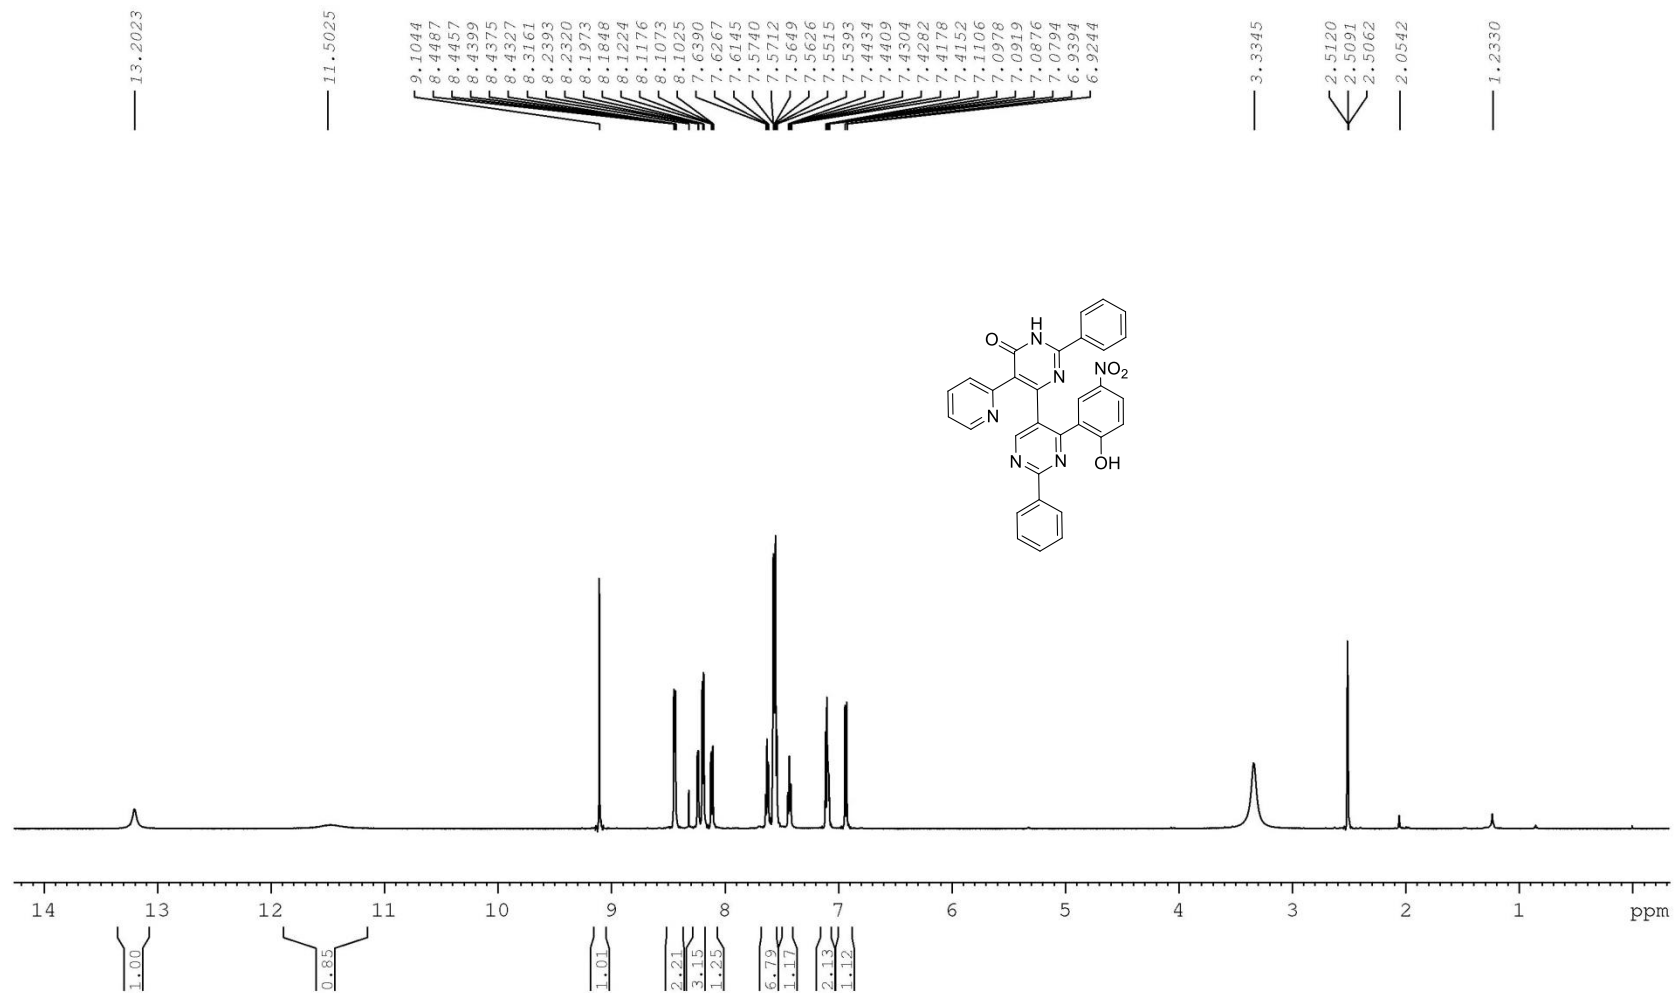

**Figure S31.**  $^1\text{H NMR}$  (600 MHz,  $\text{DMSO-}d_6$ ) spectra of compound **5b**

DEPT135

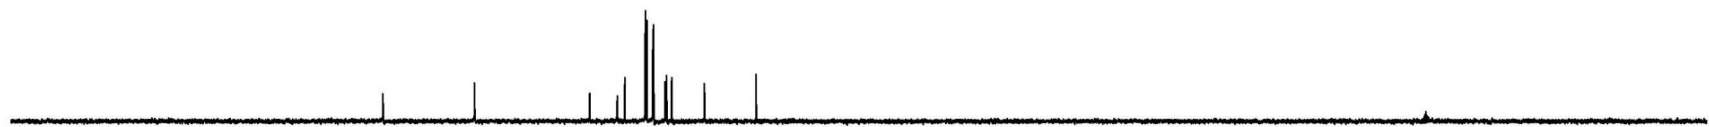

YUNNAN UNIVERSITY ASCEND AVIIIHD600 CLC-01-2  
Aug13-2020-chenli  
C13CPD DMSO

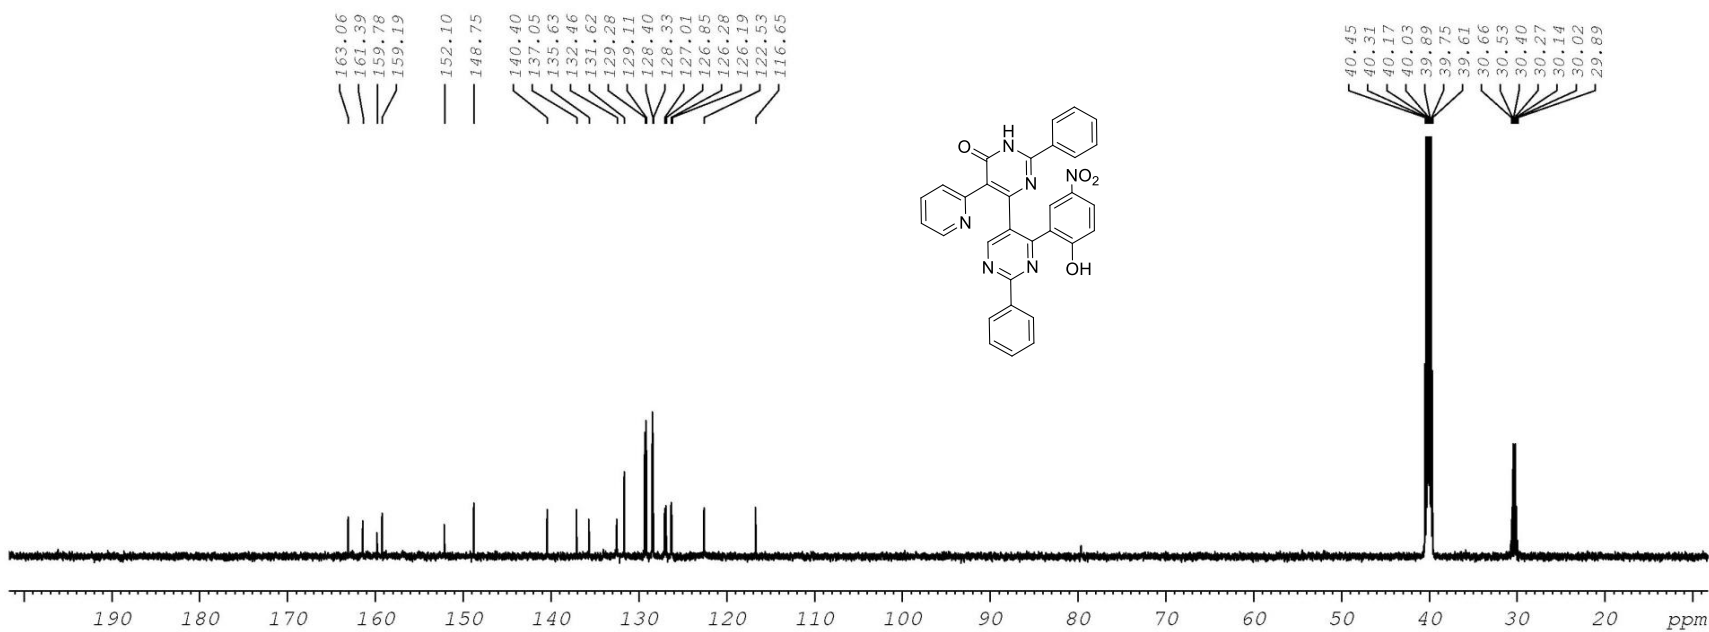

Figure S32.  $^{13}\text{C}$  NMR (150 MHz,  $\text{DMSO-}d_6$ ) spectra of compound **5b**



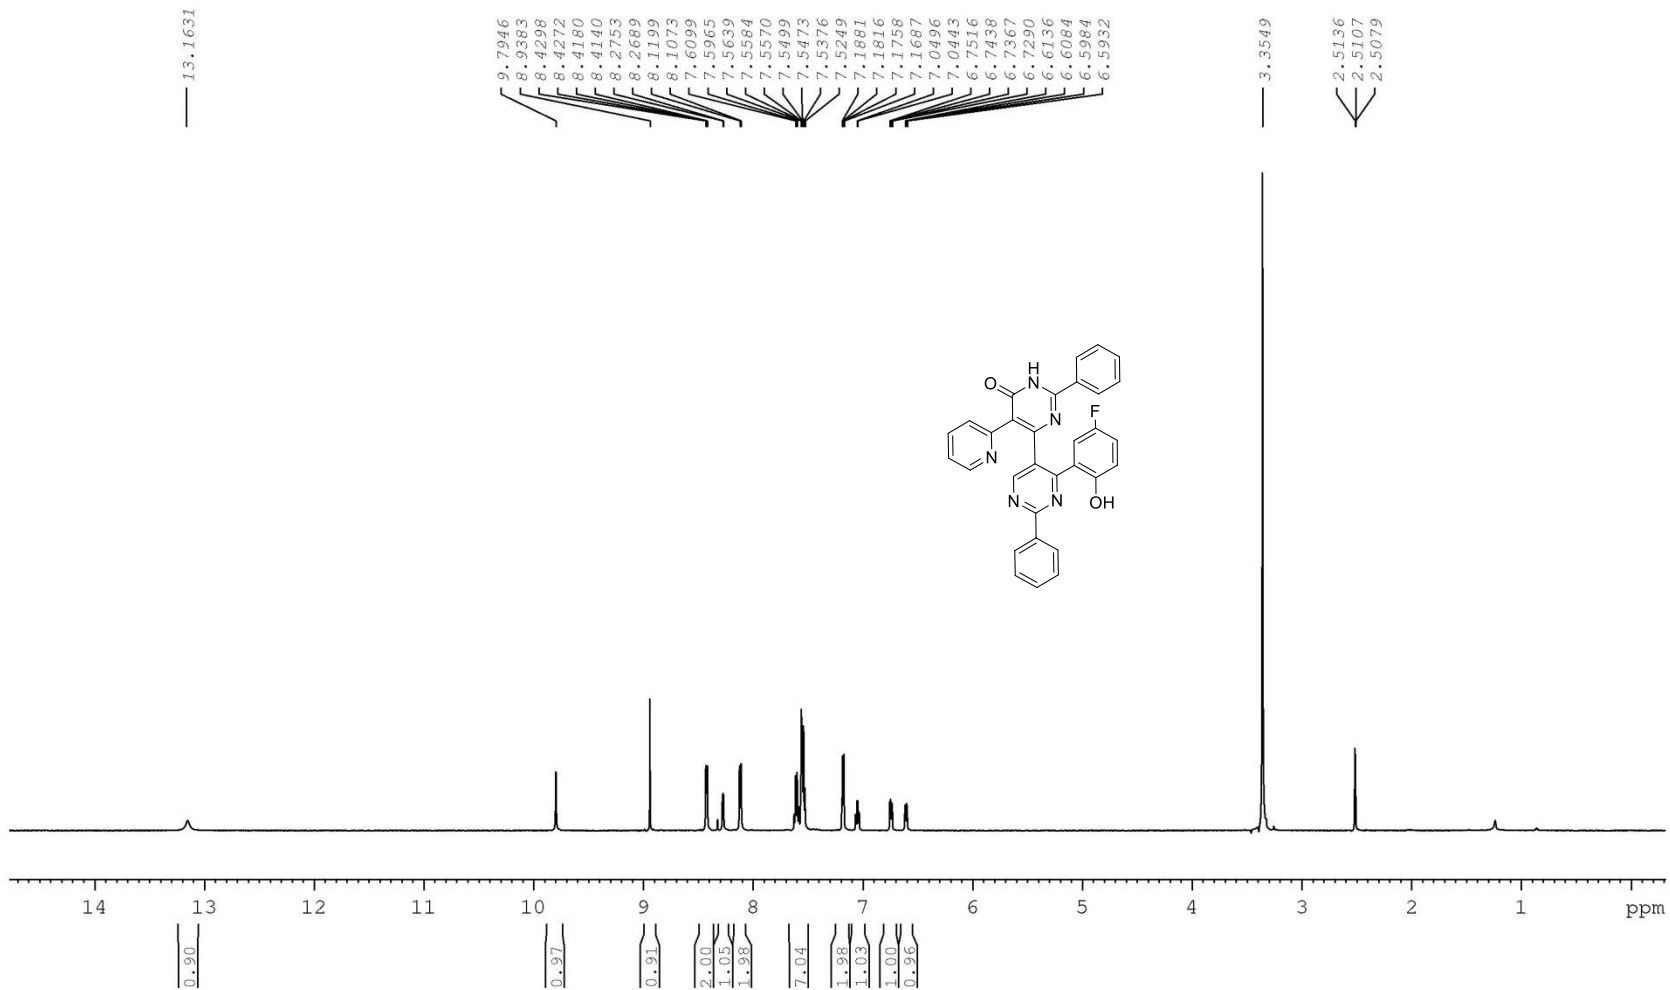

Figure S33. <sup>1</sup>H NMR (600 MHz, DMSO-*d*<sub>6</sub>) spectra of compound 5c

DEPT135

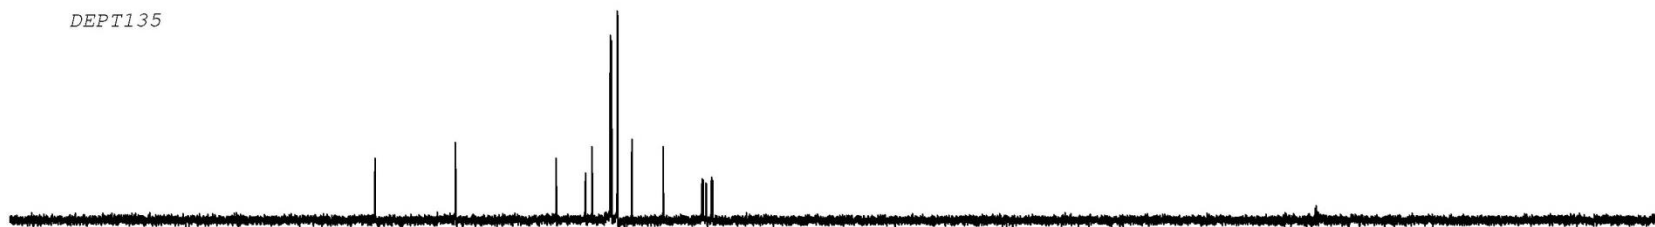

YUNNAN UNIVERSITY ASCEND AVIIIHD600 CLC-06-2  
Aug20-2020-chenli  
C13CPD DMSO

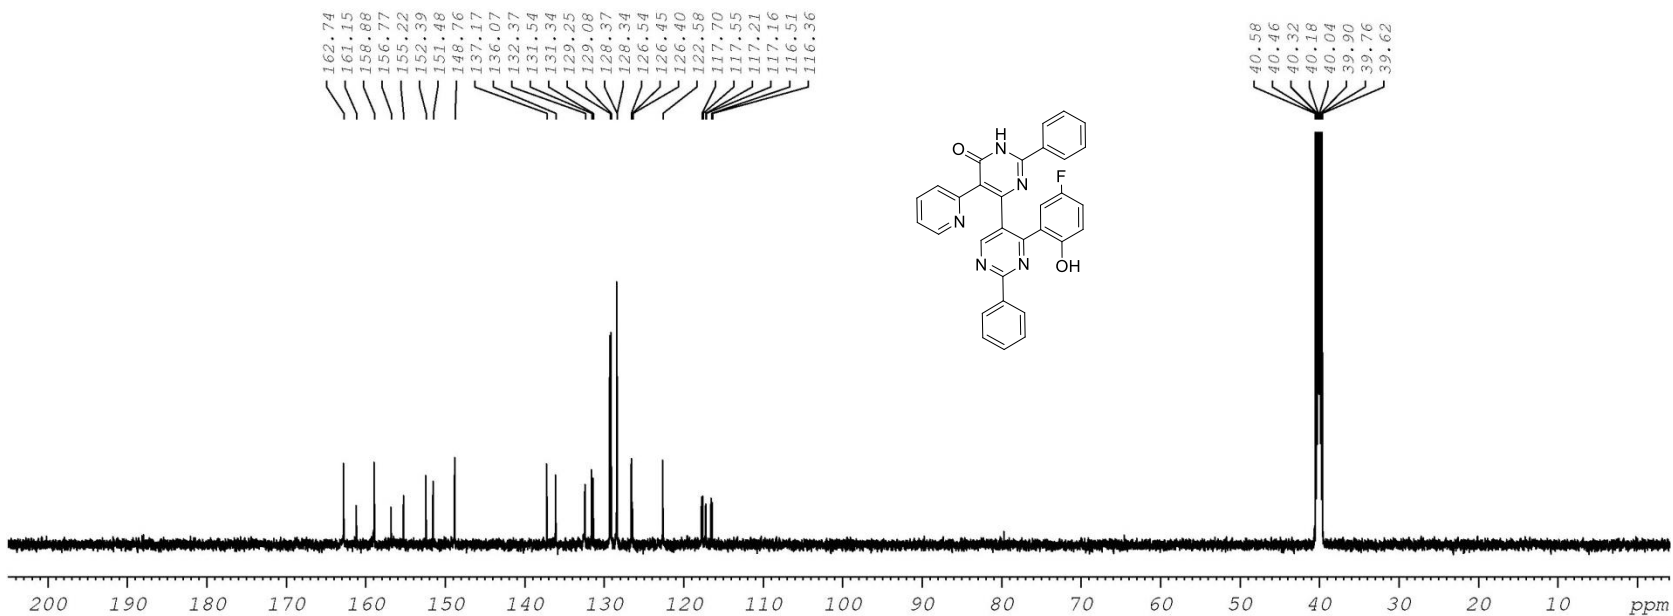

Figure S34.  $^{13}\text{C}$  NMR (150 MHz,  $\text{DMSO-}d_6$ ) spectra of compound 5c

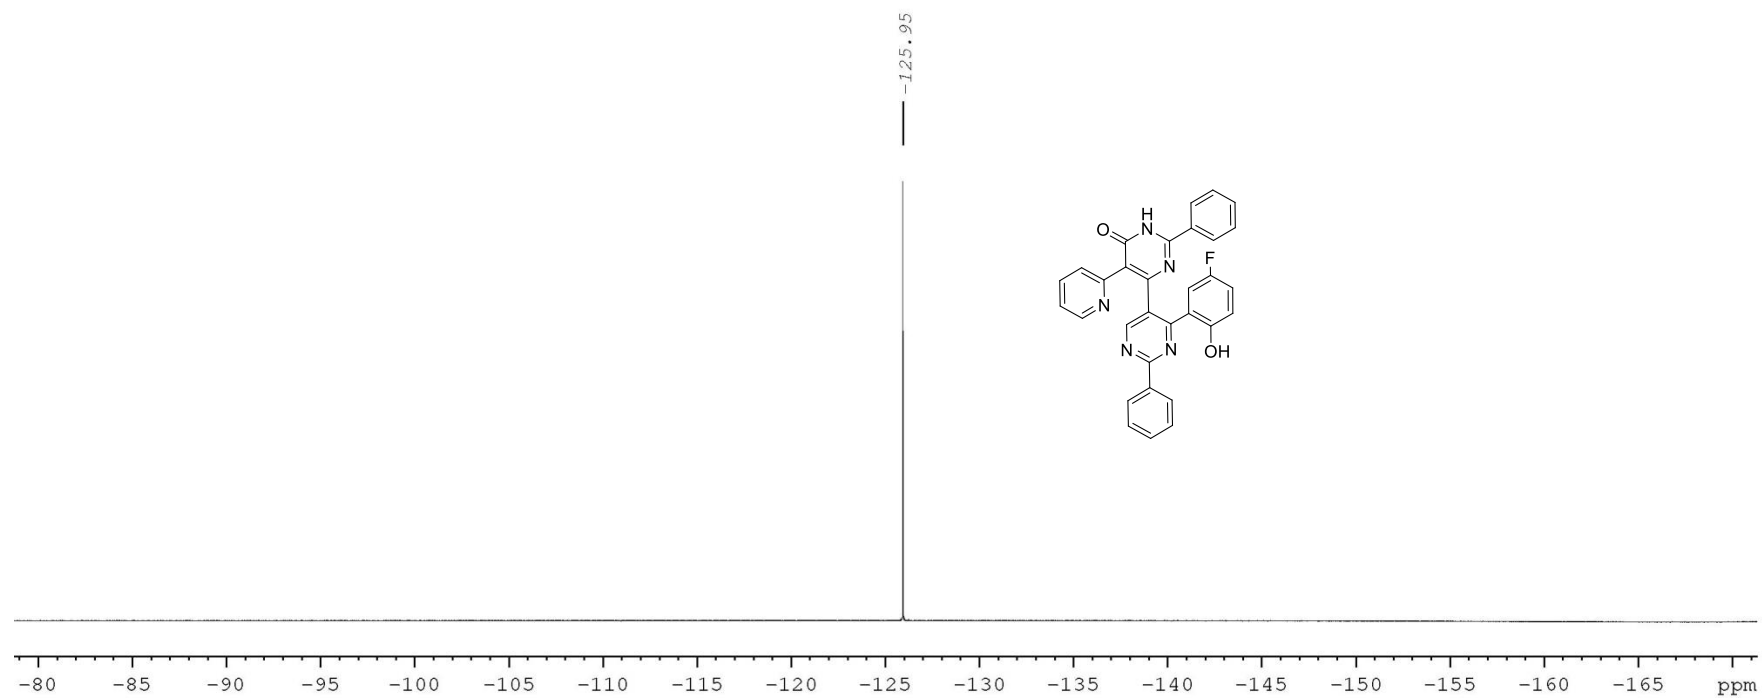

**Figure S35.**  $^{19}\text{F}$  NMR (564 MHz,  $\text{DMSO-}d_6$ ) spectra of compound **5c**

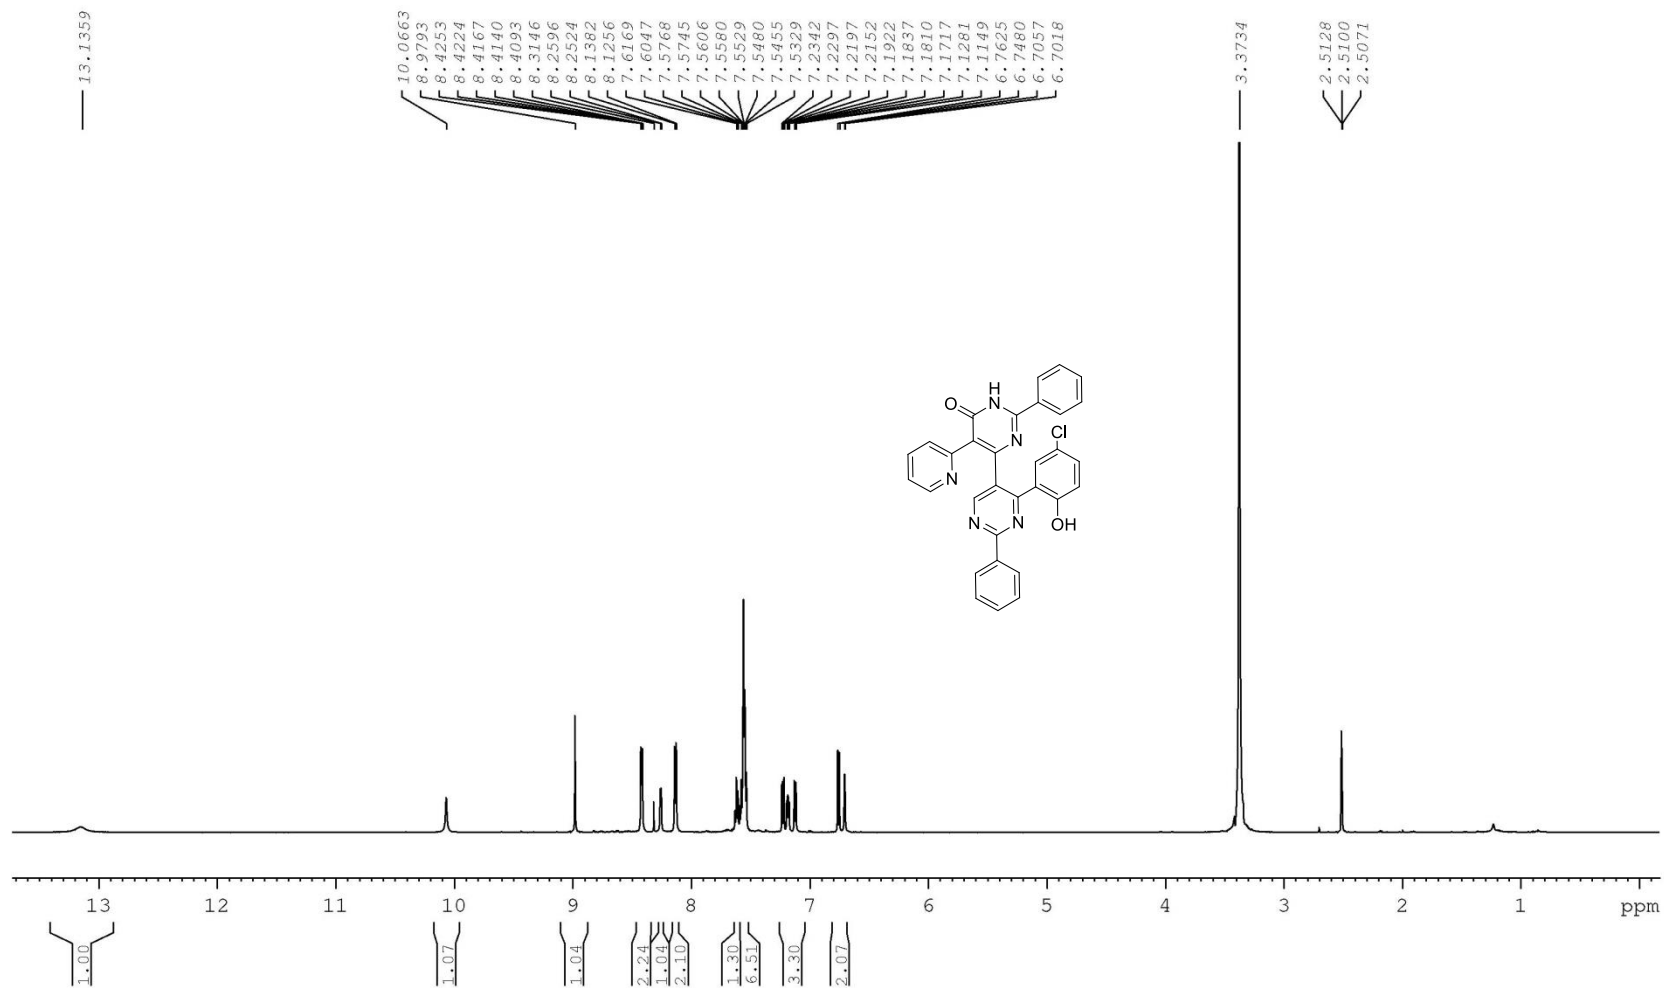

Figure S36.  $^1\text{H NMR}$  (600 MHz,  $\text{DMSO-}d_6$ ) spectra of compound **5d**

DEPT135

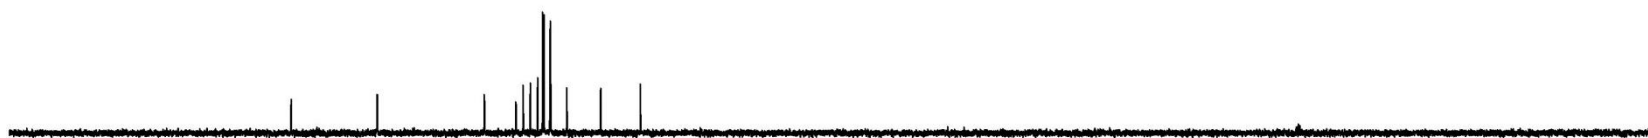

YUNNAN UNIVERSITY ASCEND AVIIIHD600 CLC-02-2  
Sep03-2020-chenli  
C13CPD DMSO

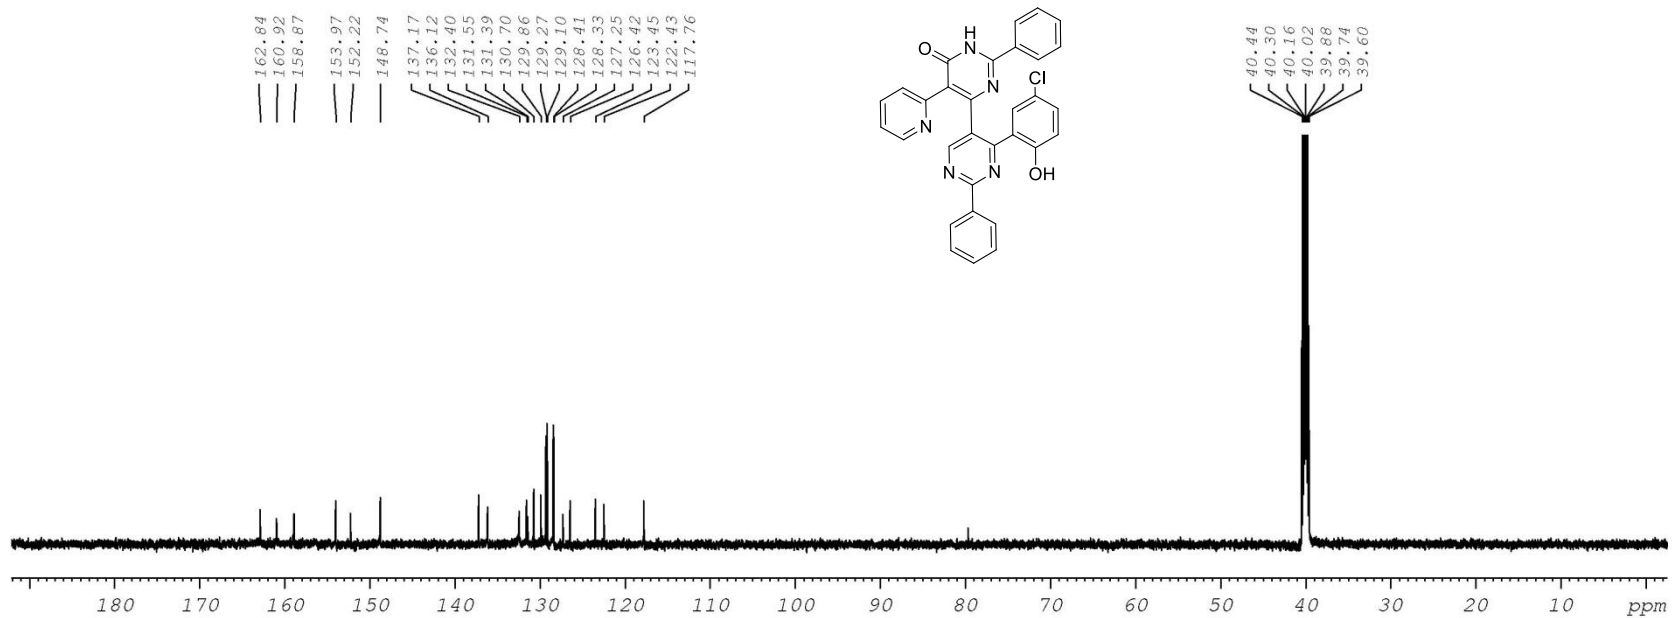

Figure S37.  $^{13}\text{C}$  NMR (150 MHz,  $\text{DMSO-}d_6$ ) spectra of compound 5d

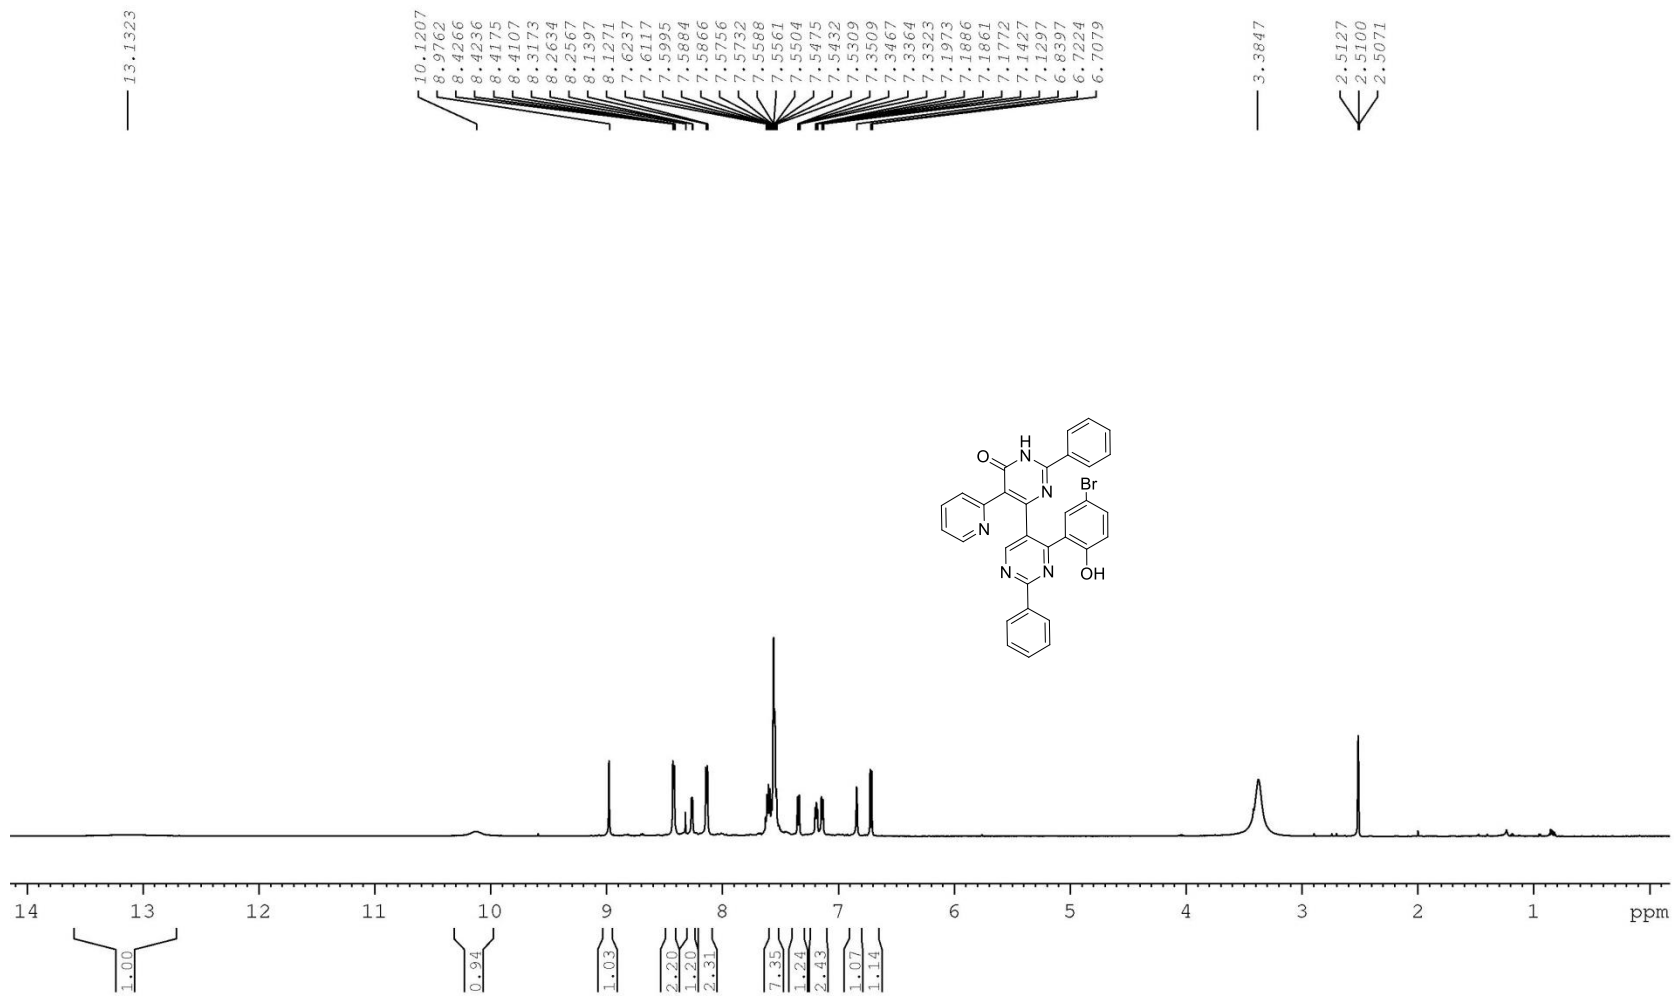

**Figure S38.**  $^1\text{H NMR}$  (600 MHz,  $\text{DMSO-}d_6$ ) spectra of compound **5e**

DEPT135

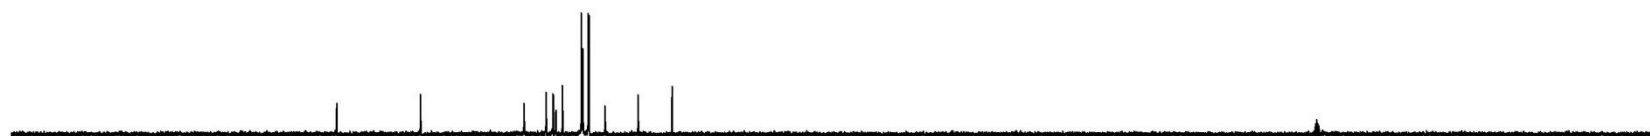

YUNNAN UNIVERSITY ASCEND AVIIIHD600 CLC-04-2  
Aug13-2020-chenli  
C13CPD DMSO

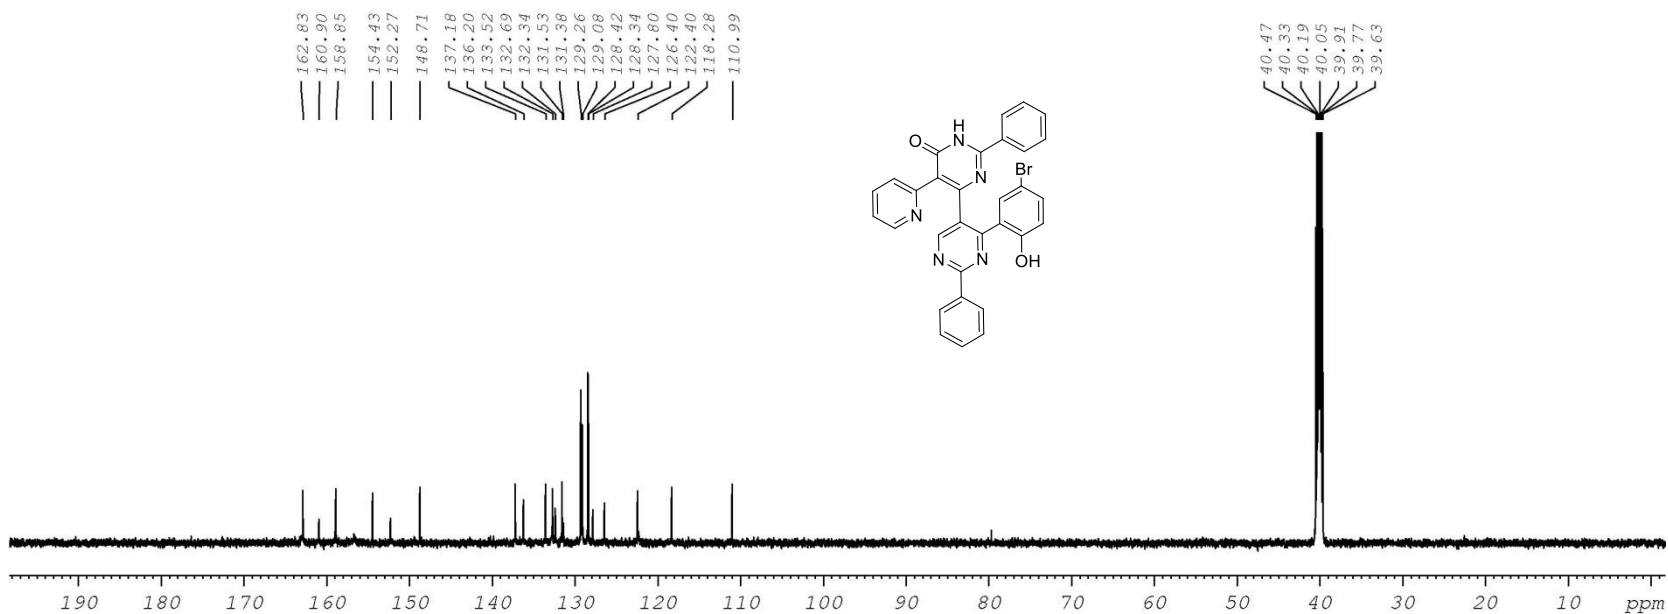

Figure S39.  $^{13}\text{C}$  NMR (150 MHz,  $\text{DMSO-}d_6$ ) spectra of compound 5e

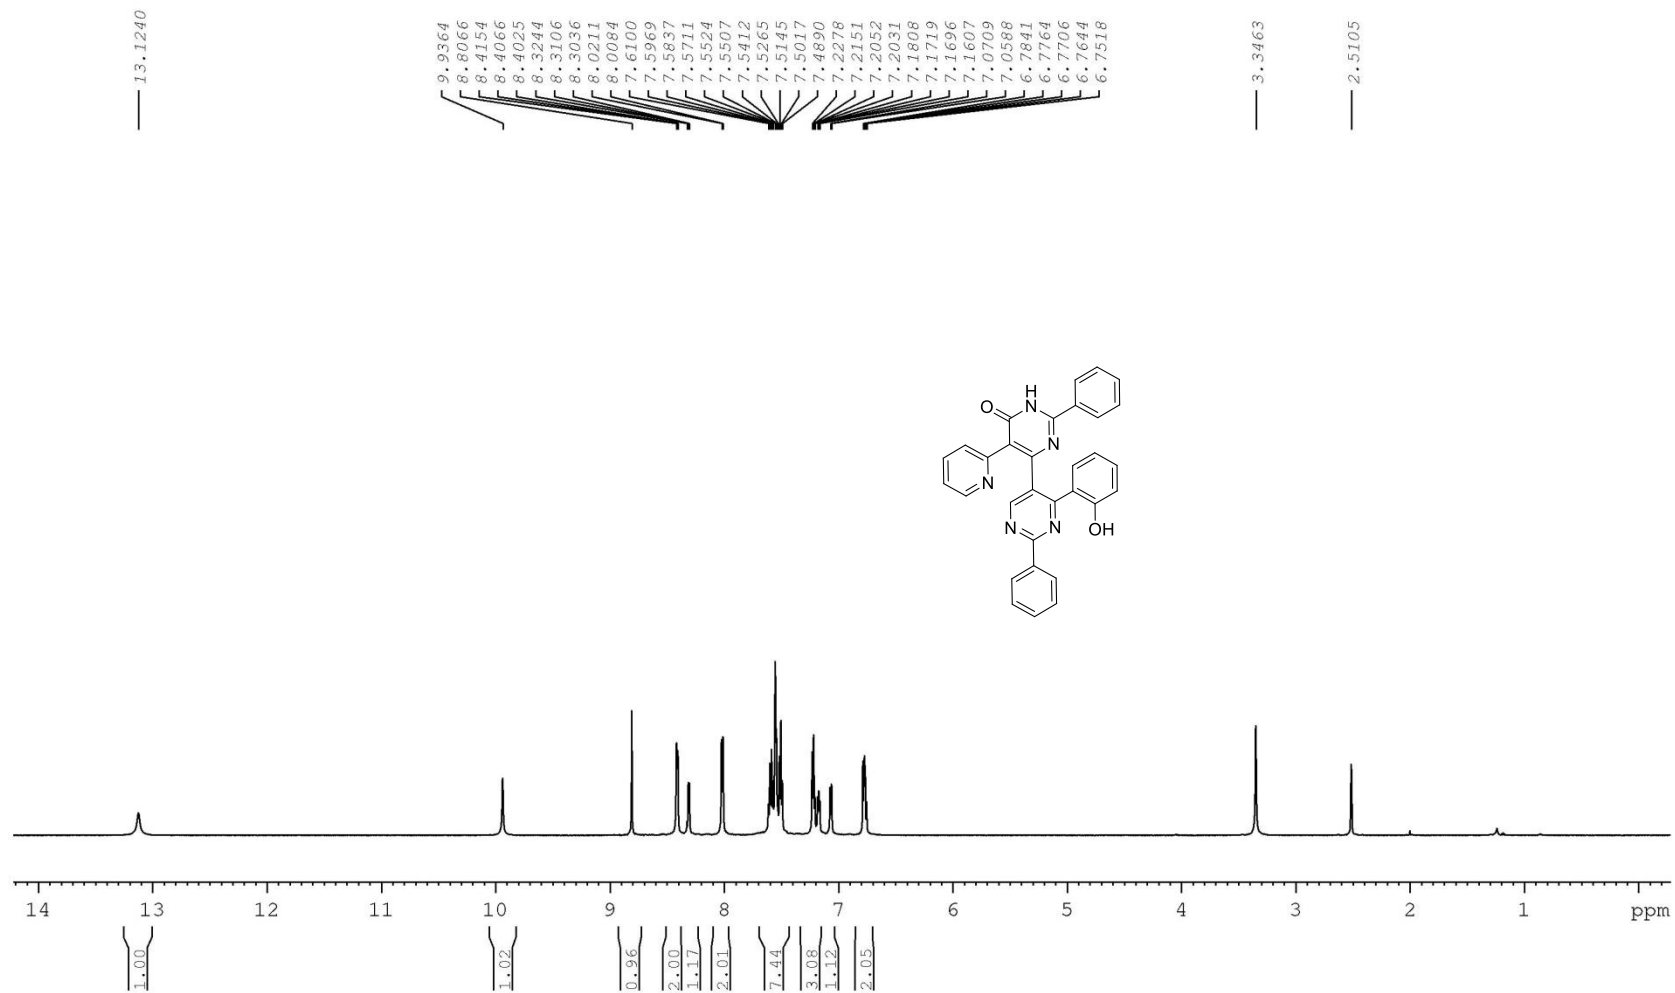

Figure S40. <sup>1</sup>H NMR (600 MHz, DMSO-*d*<sub>6</sub>) spectra of compound 5f



DEPT135

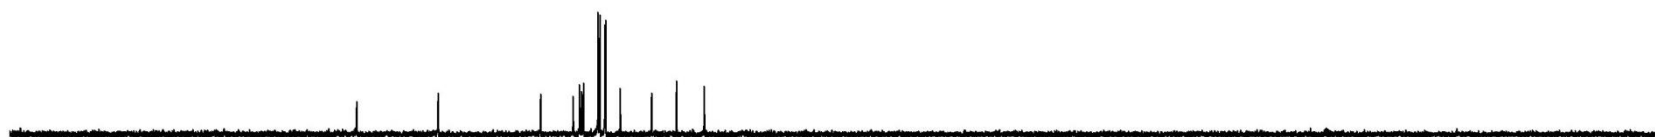

YUNNAN UNIVERSITY ASCEND AVIIIHD600 CLC-07-2  
Aug24-2020-chenli  
C13CPD DMSO

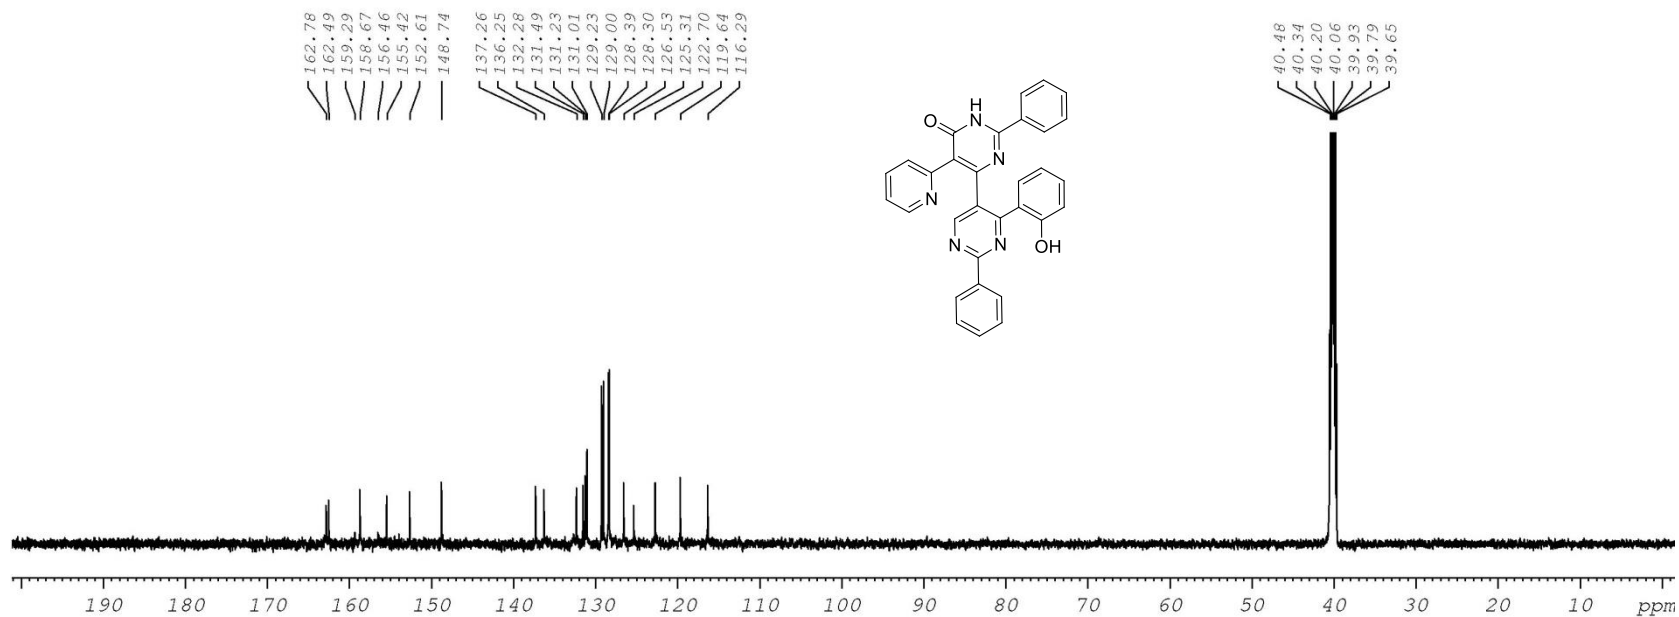

Figure S41.  $^{13}\text{C}$  NMR (150 MHz,  $\text{DMSO}-d_6$ ) spectra of compound 5f

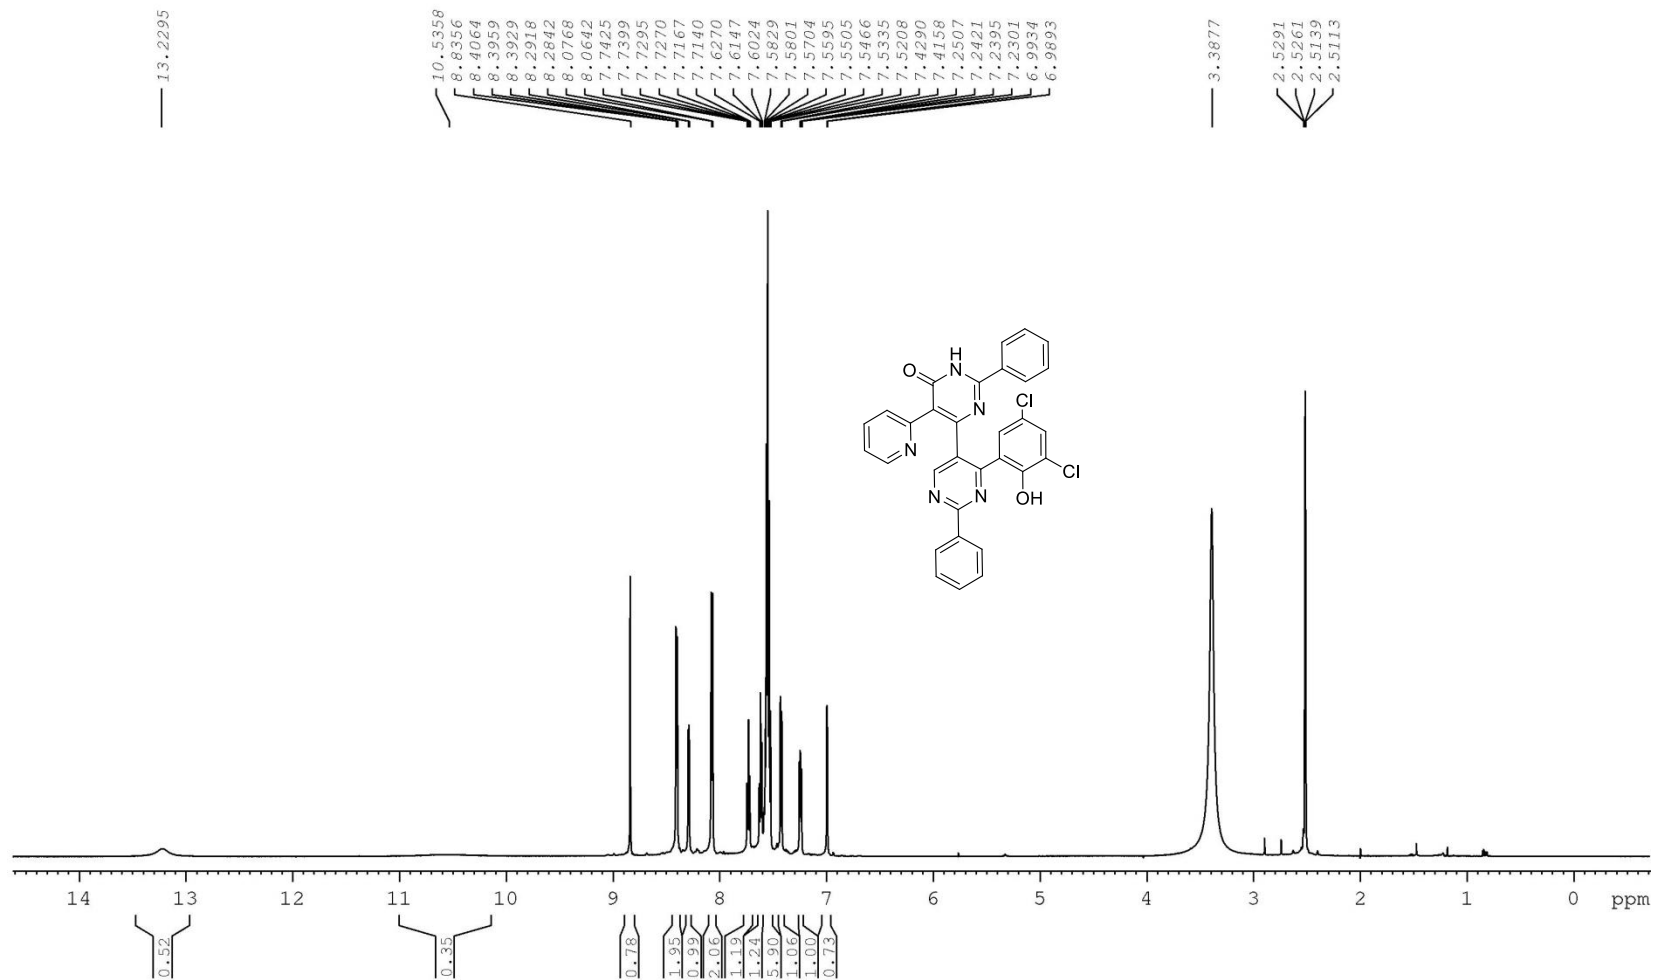

DEPT135

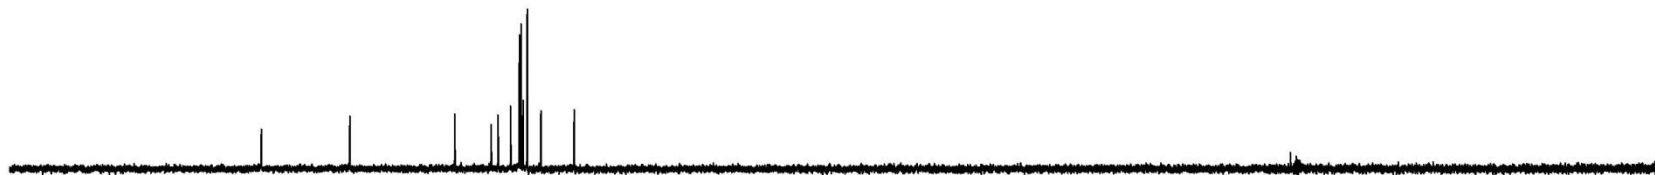

YUNNAN UNIVERSITY ASCEND AVIIIHD600 CLC-05-2  
Sep04-2020-chenli  
C13CPD DMSO

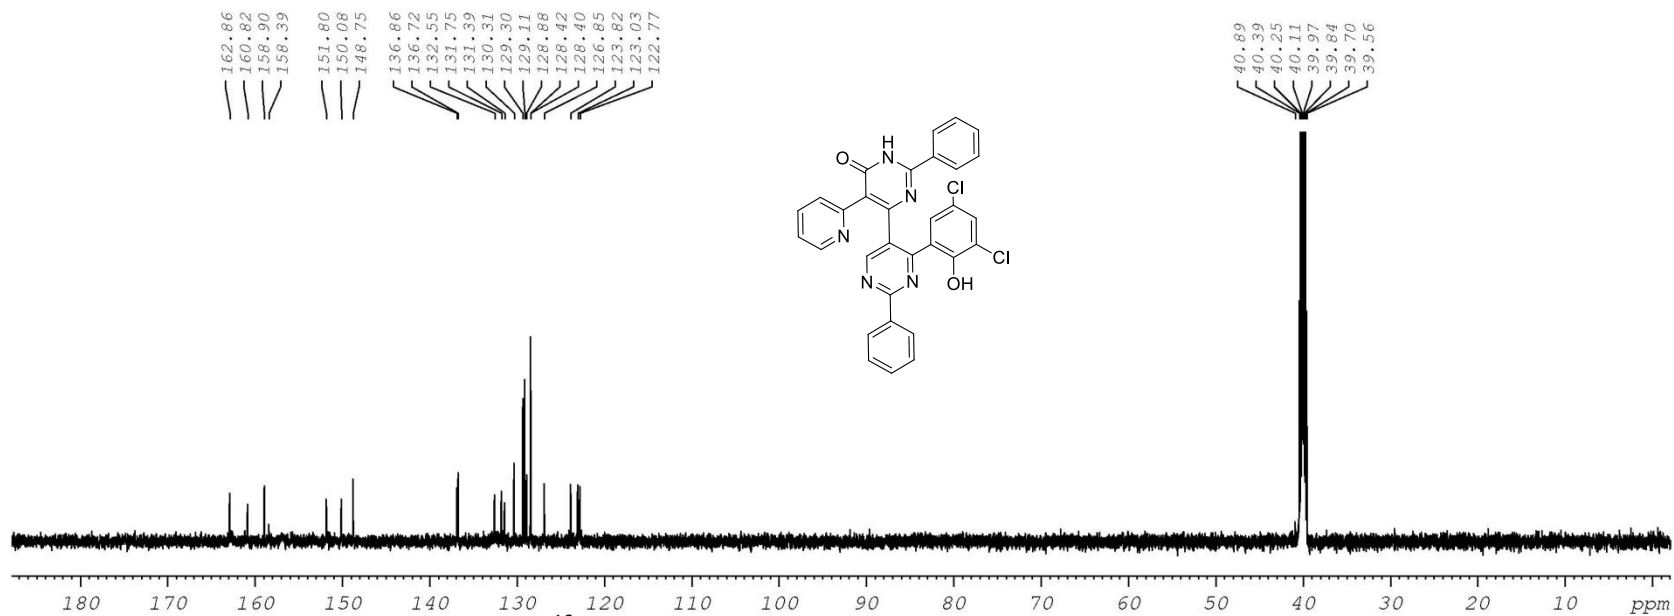

Figure S43.  $^{13}\text{C}$  NMR (150 MHz,  $\text{DMSO-}d_6$ ) spectra of compound 5g

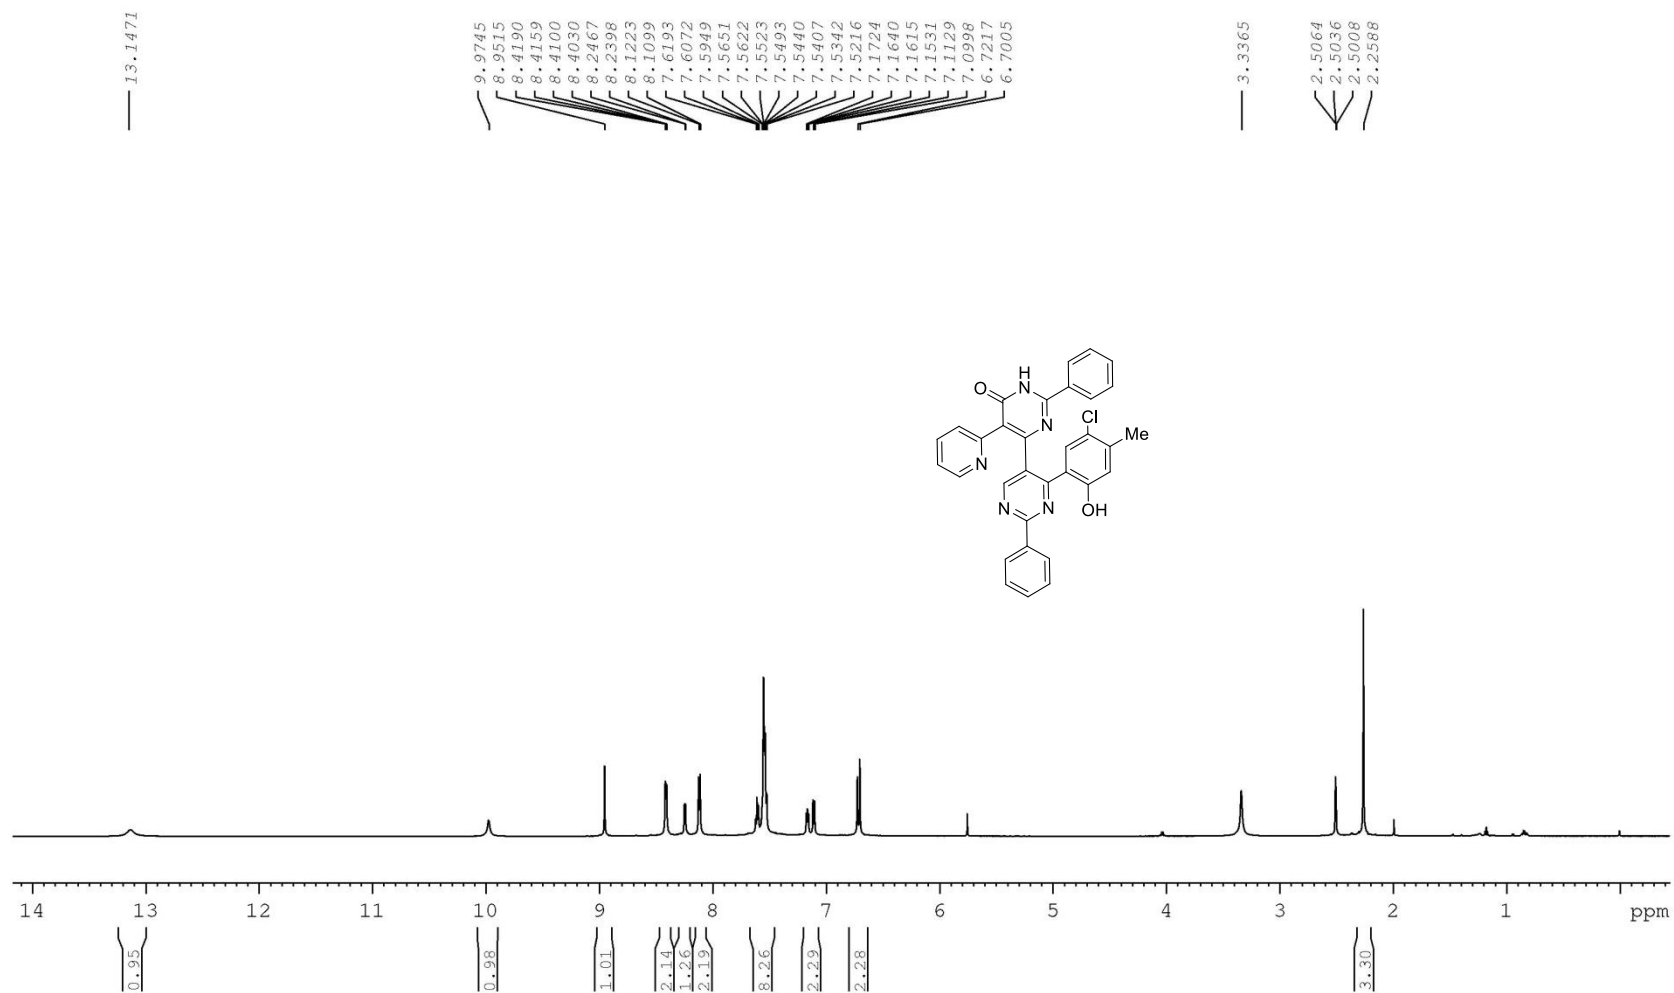

**Figure S44.**  $^1\text{H NMR}$  (600 MHz,  $\text{DMSO-}d_6$ ) spectra of compound **5h**

DEPT135

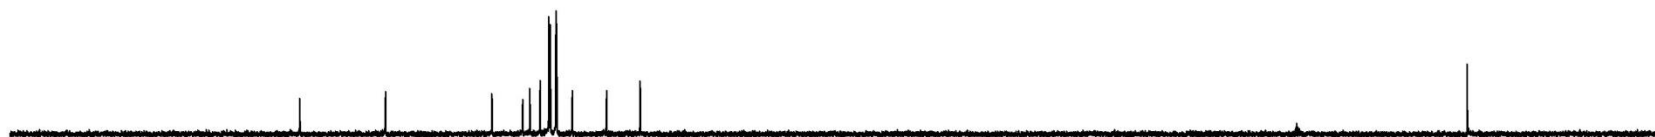

YUNNAN UNIVERSITY ASCEND AVIIIHD600 CLC-14-2  
Aug14-2020-chenli  
C13CPD DMSO

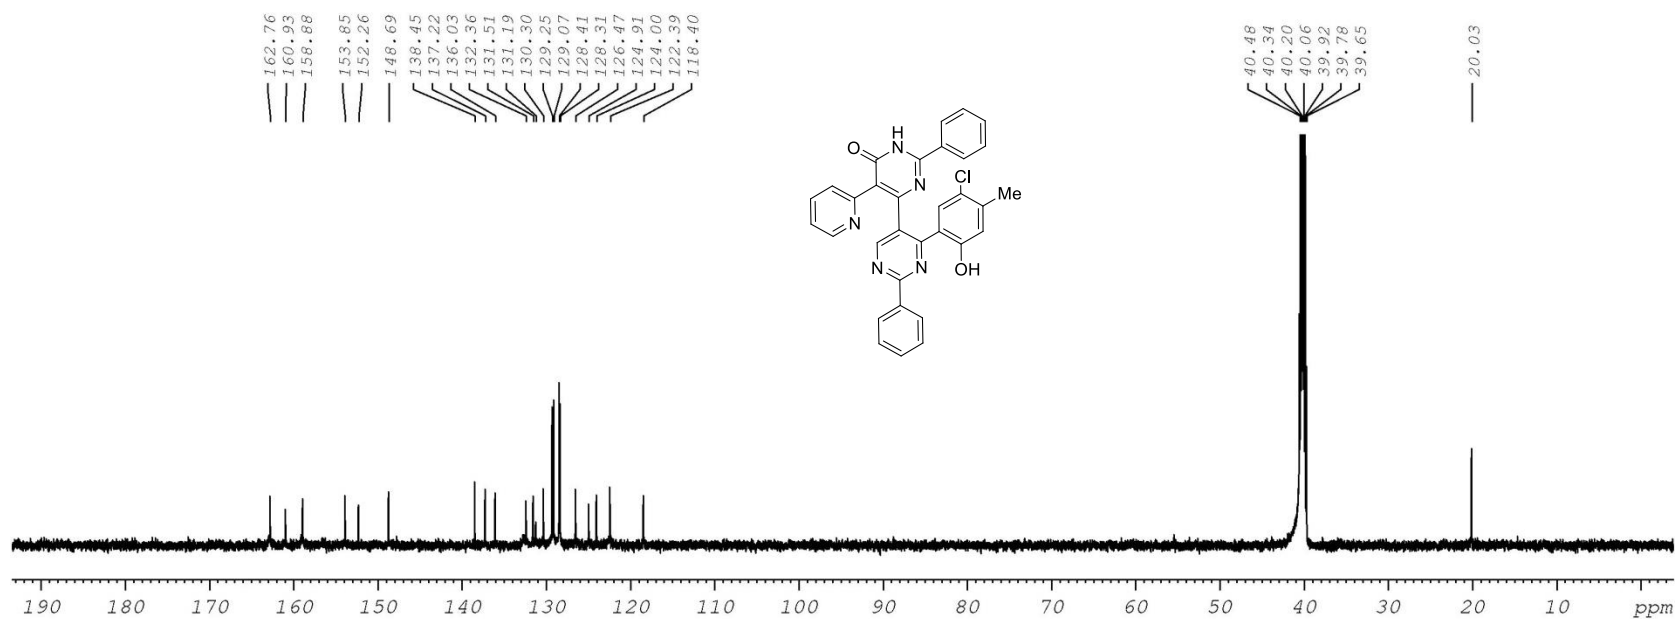

Figure S45.  $^{13}\text{C}$  NMR (150 MHz,  $\text{DMSO-}d_6$ ) spectra of compound 5h

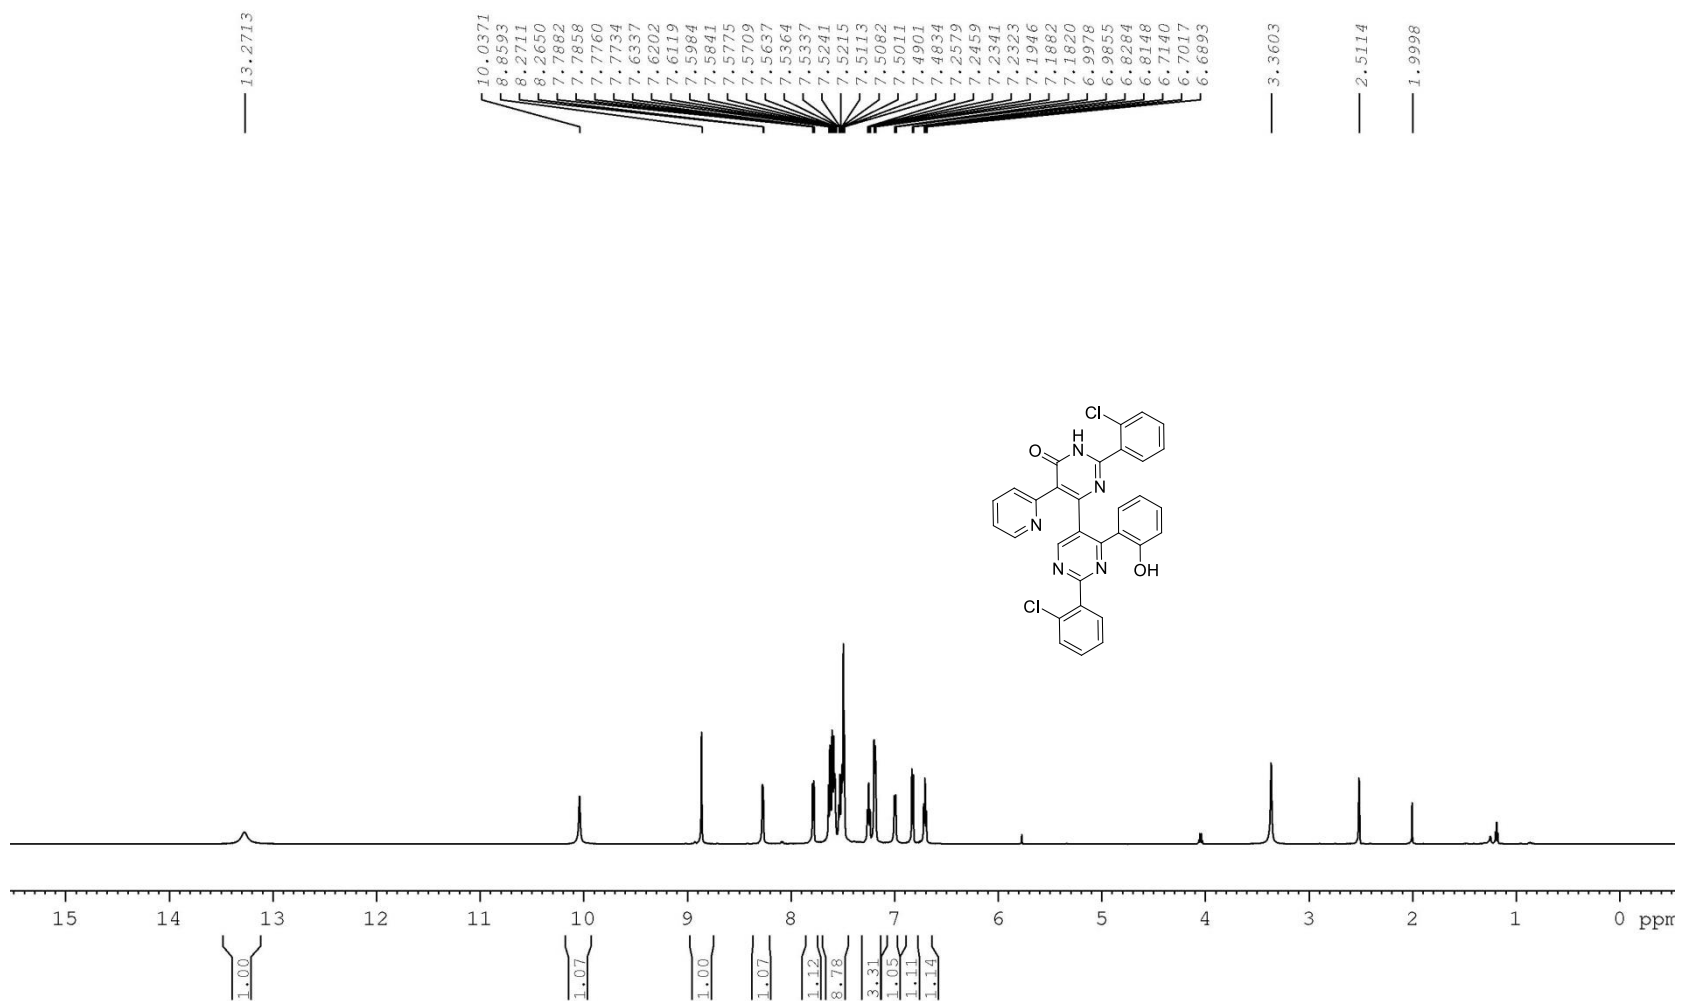

**Figure S46.** <sup>1</sup>H NMR (600 MHz, DMSO-*d*<sub>6</sub>) spectra of compound **5i**

DEPT135

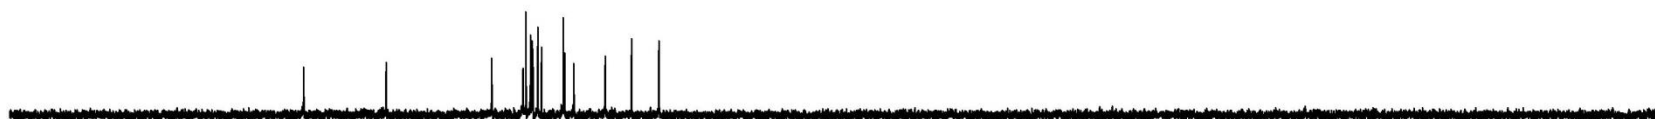

YUNNAN UNIVERSITY ASCEND AVIIIHD600 CLC-08-2  
Aug20-2020-chenli  
C13CPD DMSO

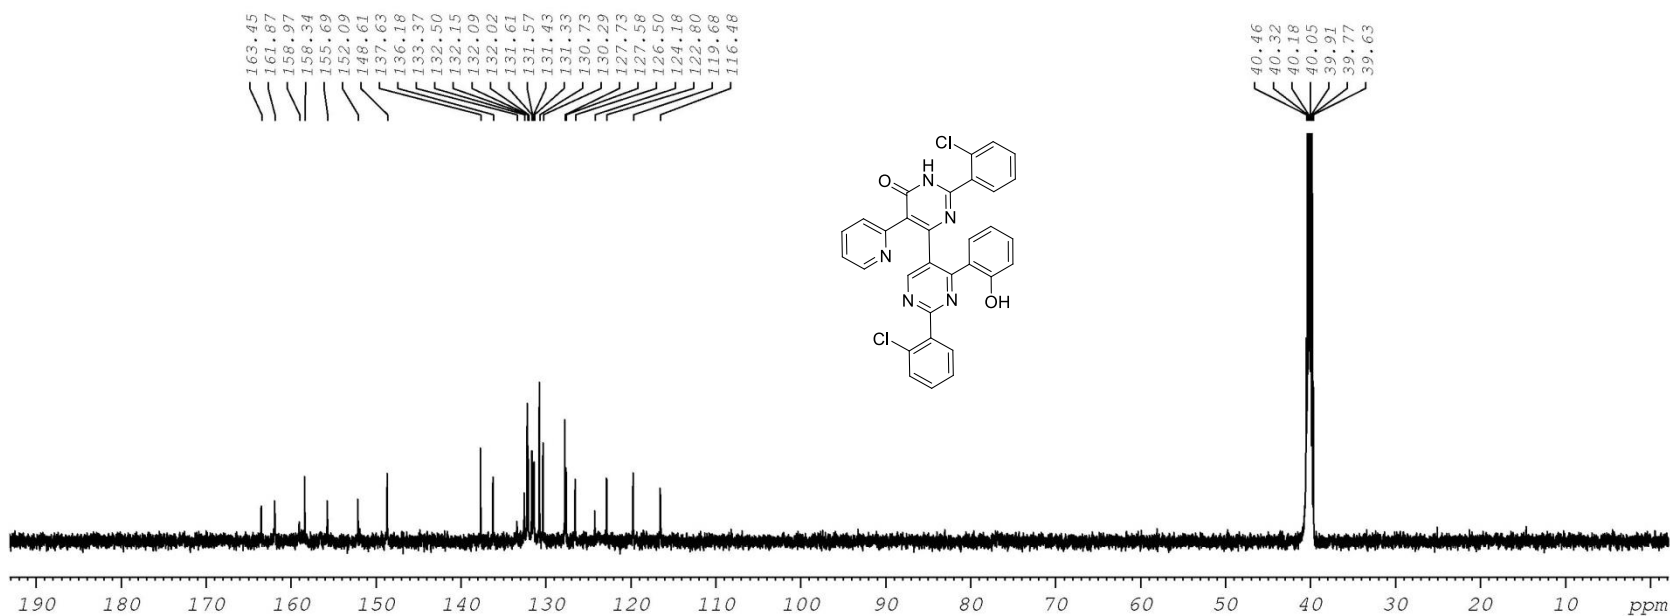

Figure S47.  $^{13}\text{C}$  NMR (150 MHz,  $\text{DMSO-}d_6$ ) spectra of compound **5i**

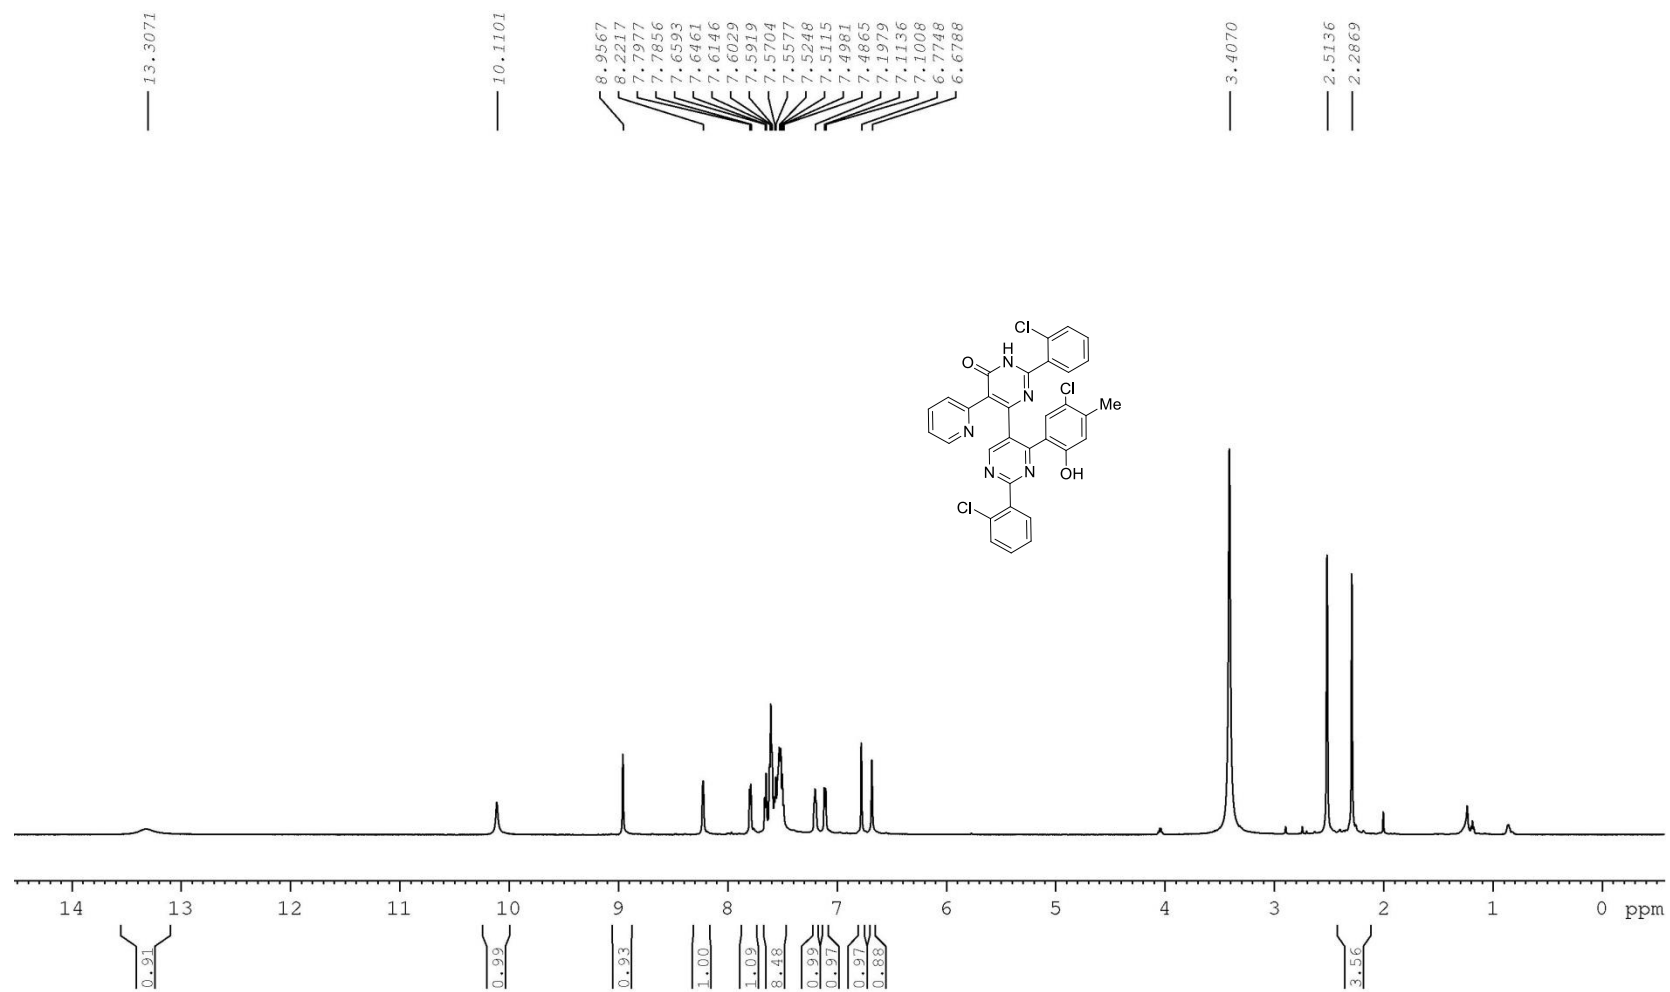

**Figure S48.**  $^1\text{H}$  NMR (600 MHz,  $\text{DMSO-}d_6$ ) spectra of compound **5j**



DEPT135

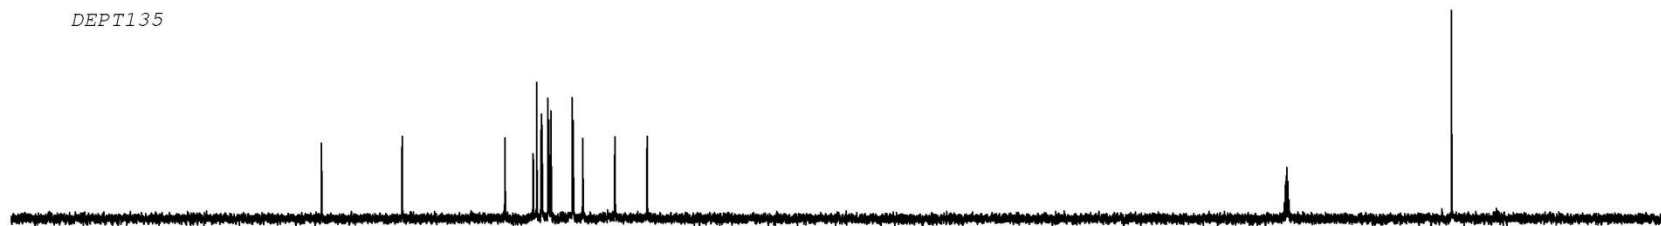

YUNNAN UNIVERSITY ASCEND AVIIIHD600 CLC-10-2  
Jun12-2021-chenli  
C13CPD DMSO

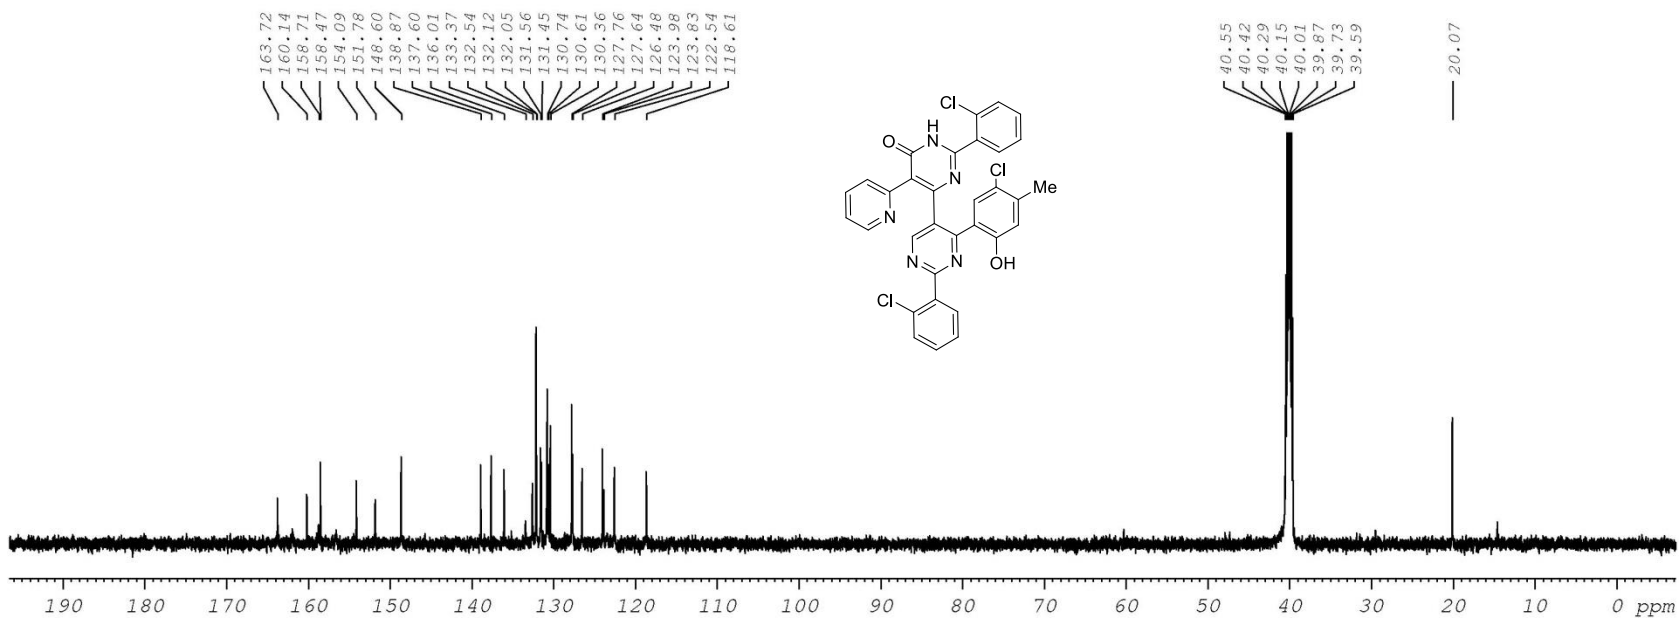

Figure S49.  $^{13}\text{C}$  NMR (150 MHz,  $\text{DMSO-}d_6$ ) spectra of compound **5j**

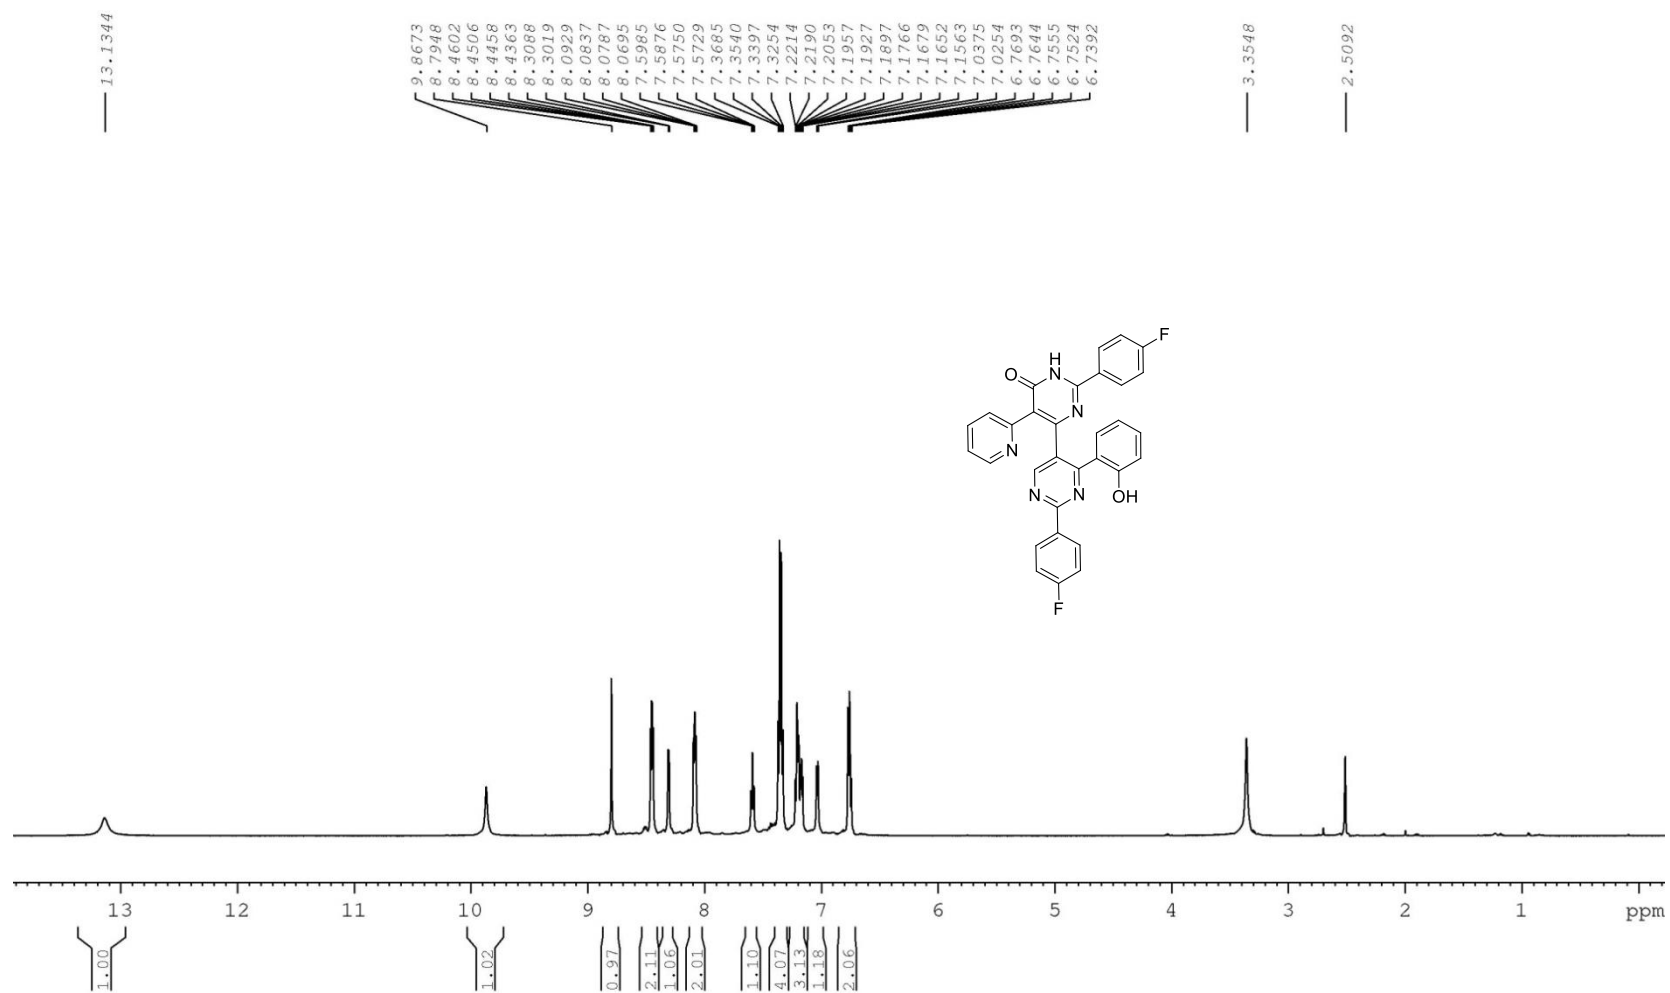

**Figure S50.** <sup>1</sup>H NMR (600 MHz, DMSO-*d*<sub>6</sub>) spectra of compound **5k**

DEPT135

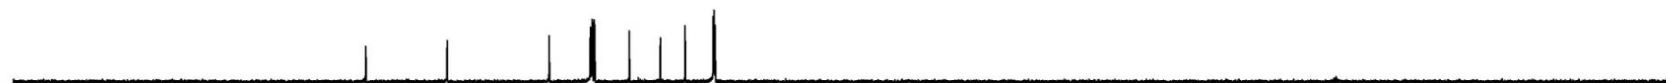

YUNNAN UNIVERSITY ASCEND AVIIIHD600 CLC-19-2  
Aug31-2020-chenli  
C13CPD DMSO

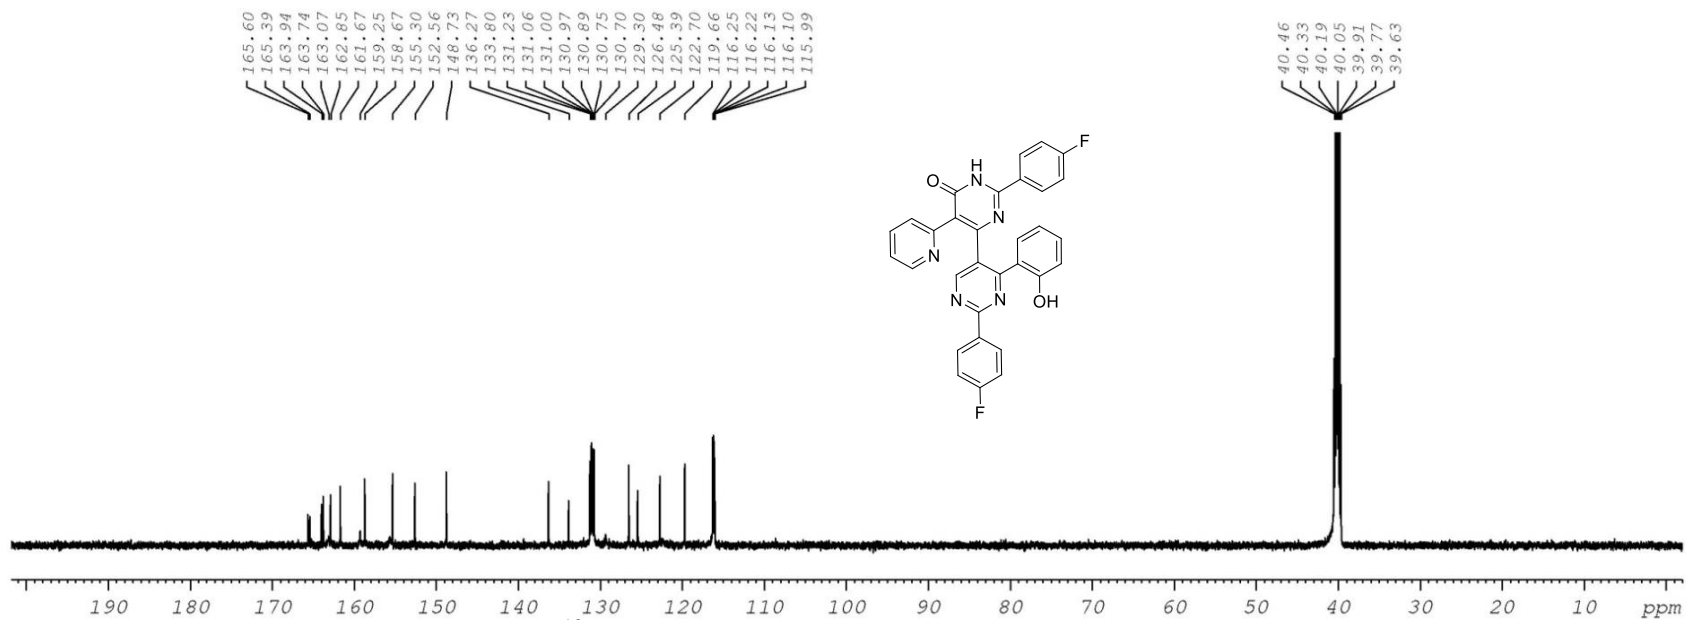

Figure S51.  $^{13}\text{C}$  NMR (150 MHz,  $\text{DMSO-}d_6$ ) spectra of compound 5k

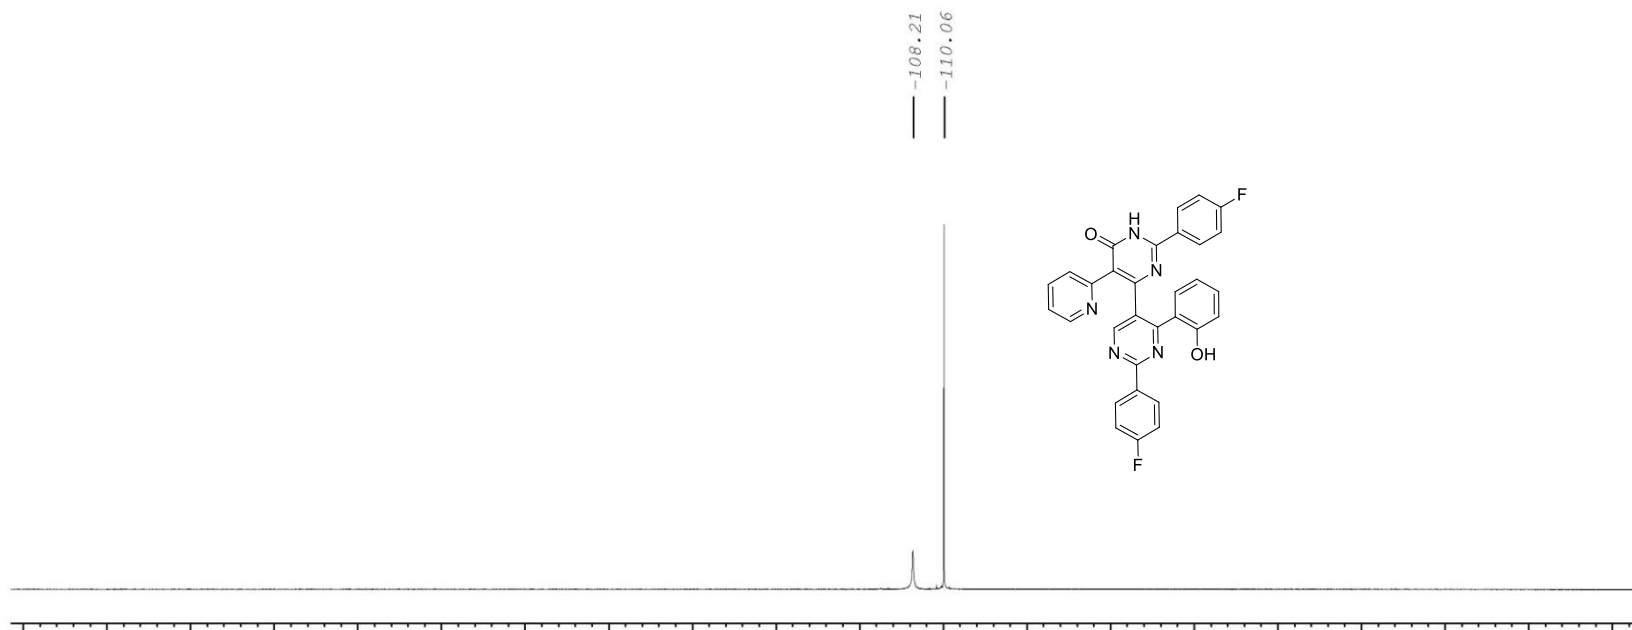

**Figure S52.**  $^{19}\text{F}$  NMR (564 MHz,  $\text{DMSO-}d_6$ ) spectra of compound **5k**

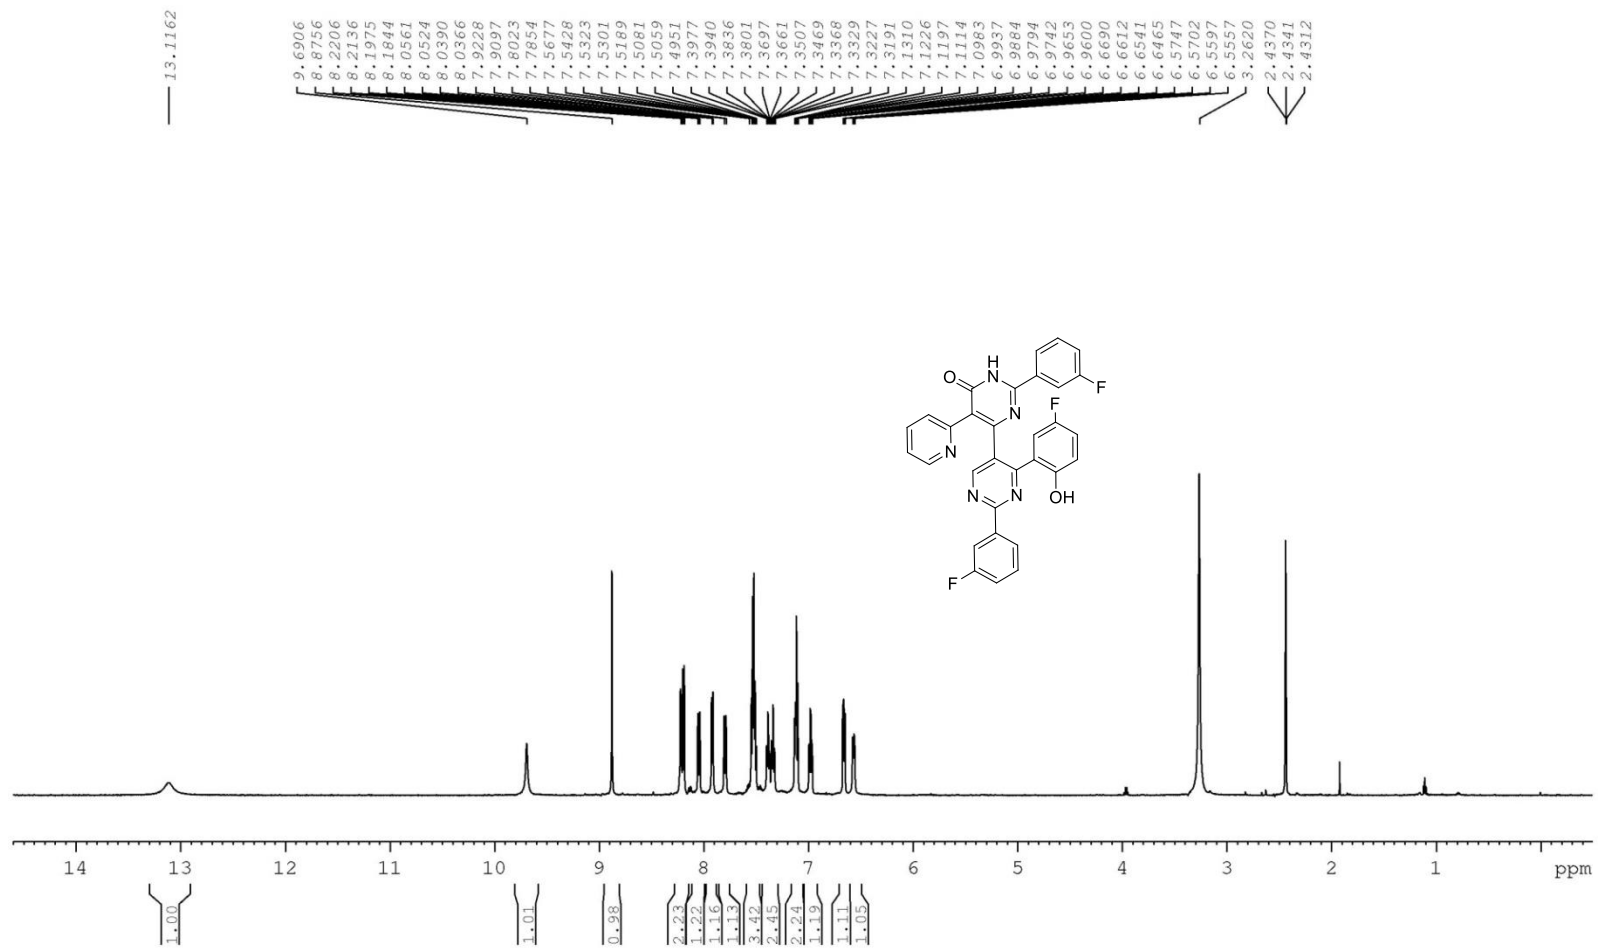

**Figure S53.**  $^1\text{H NMR}$  (600 MHz,  $\text{DMSO-}d_6$ ) spectra of compound **51**

DEPT135

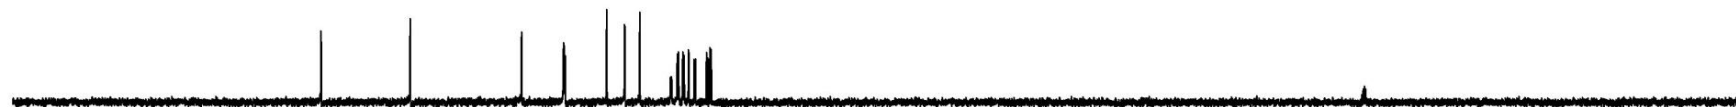

YUNNAN UNIVERSITY ASCEND AVIIIHD600 CLC-18-2  
Aug24-2020-chenli  
C13CPD DMSO

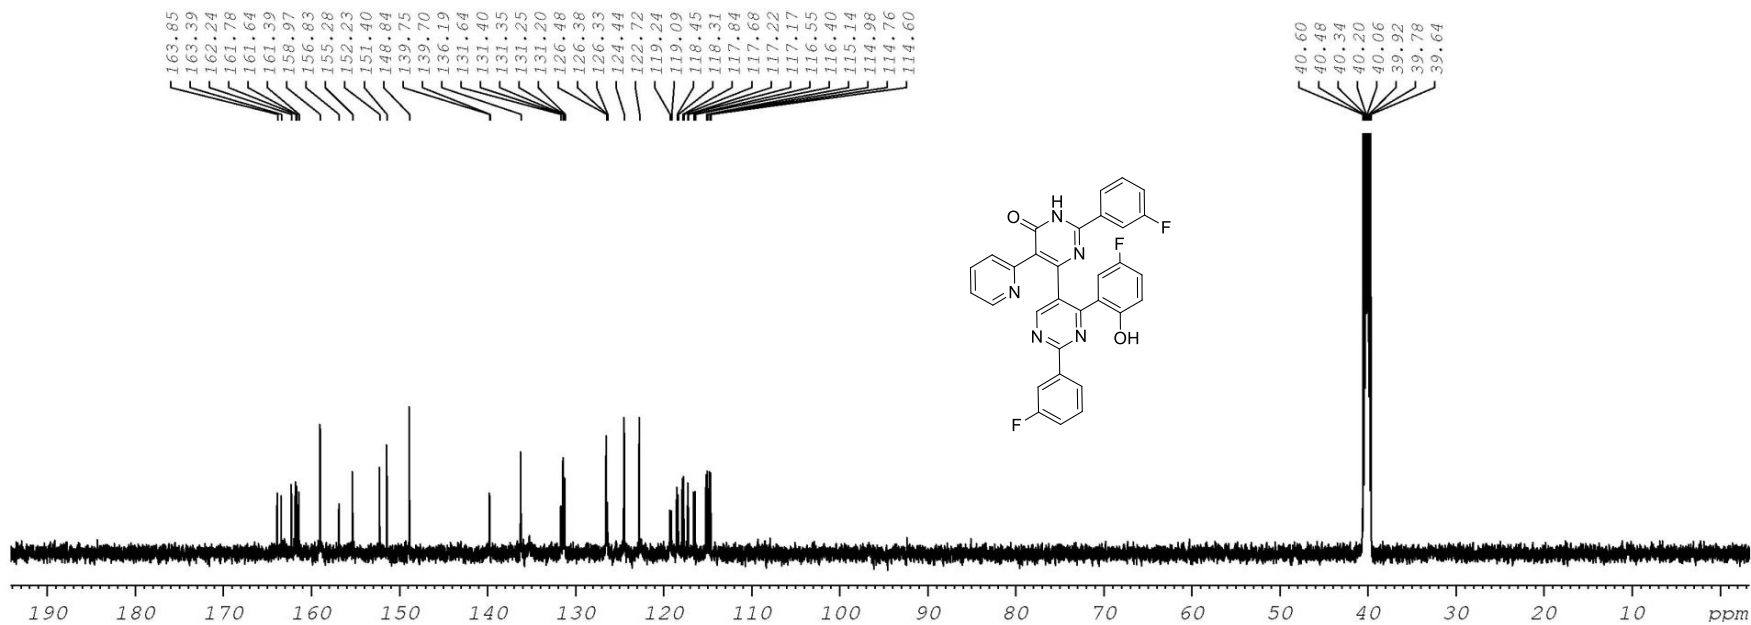

Figure S54.  $^{13}\text{C}$  NMR (150 MHz,  $\text{DMSO-}d_6$ ) spectra of compound 51

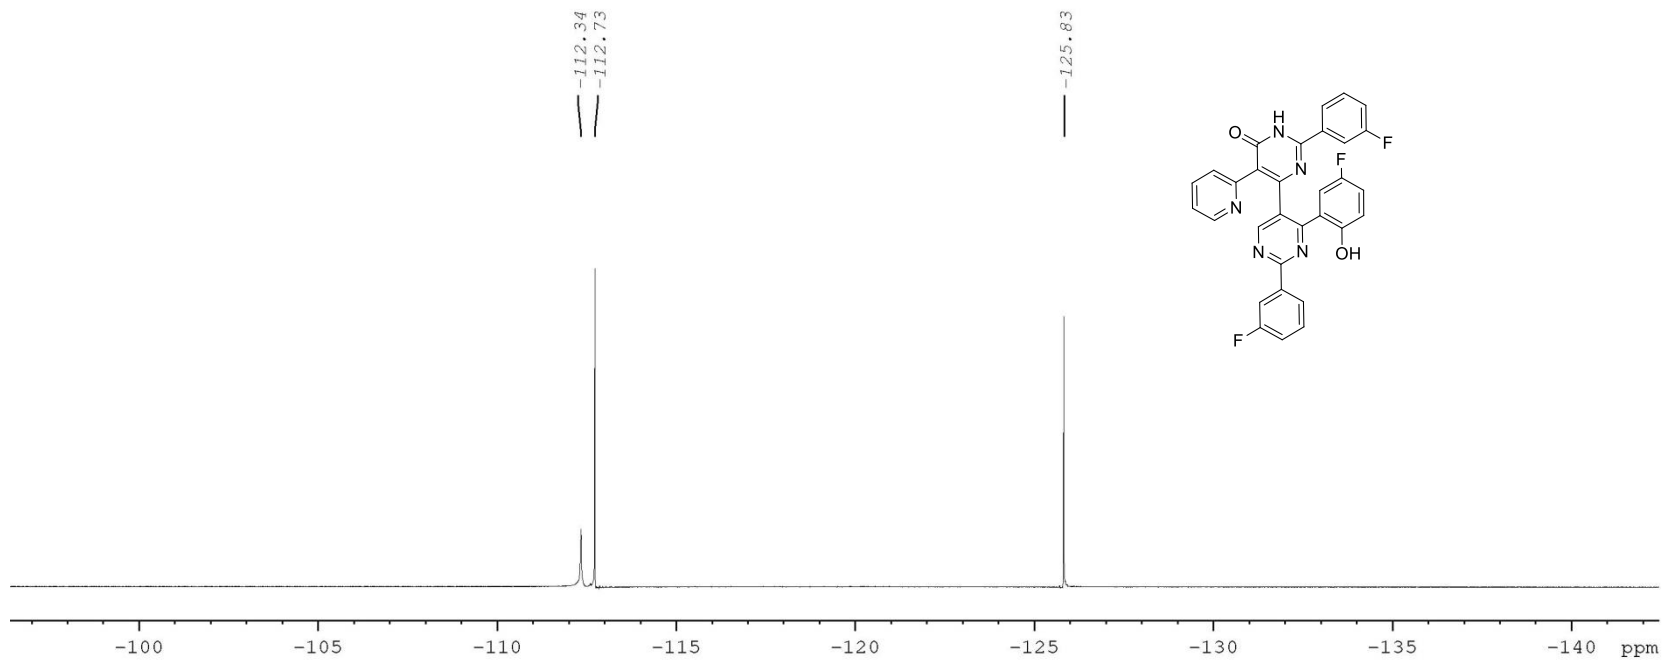

**Figure S55.**  $^{19}\text{F}$  NMR (564 MHz,  $\text{DMSO-}d_6$ ) spectra of compound **5I**

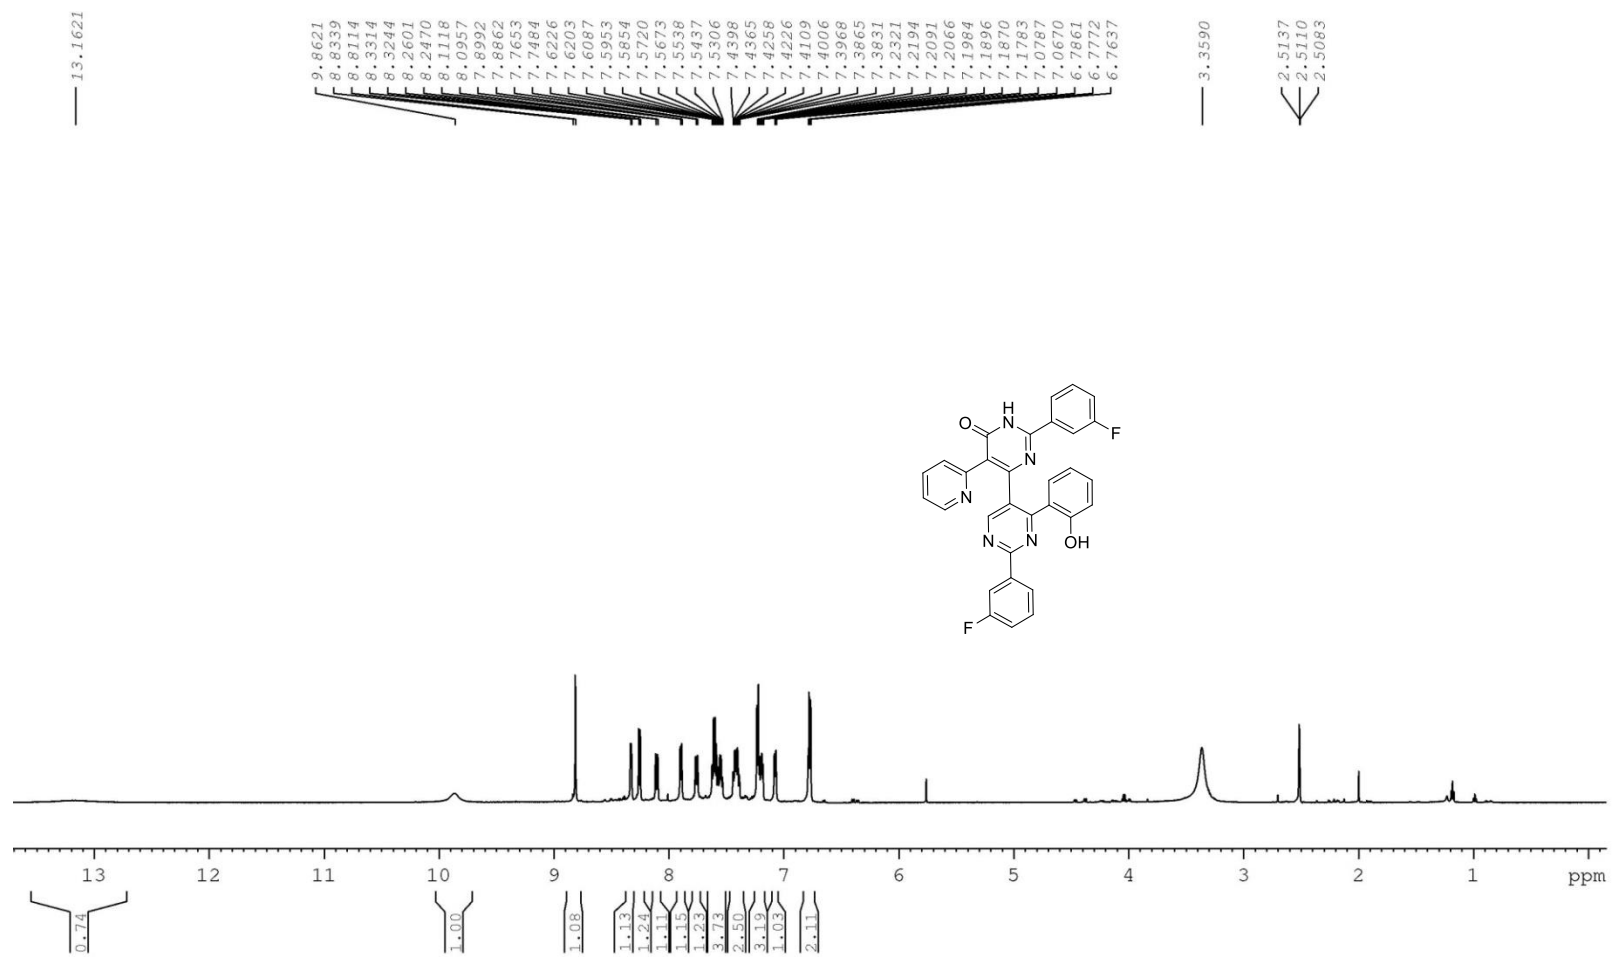

**Figure S56.** <sup>1</sup>H NMR (600 MHz, DMSO-*d*<sub>6</sub>) spectra of compound **5m**



DEPT135

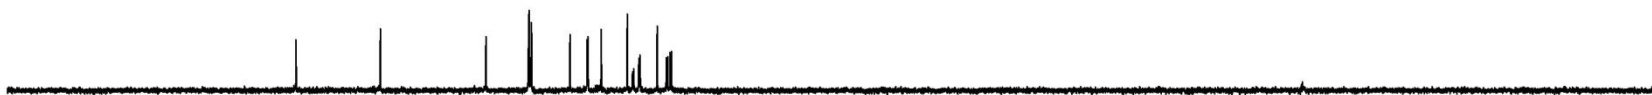

YUNNAN UNIVERSITY ASCEND AVIIIHD600 CLC-24  
Sep11-2020-chenli  
C13CPD DMSO

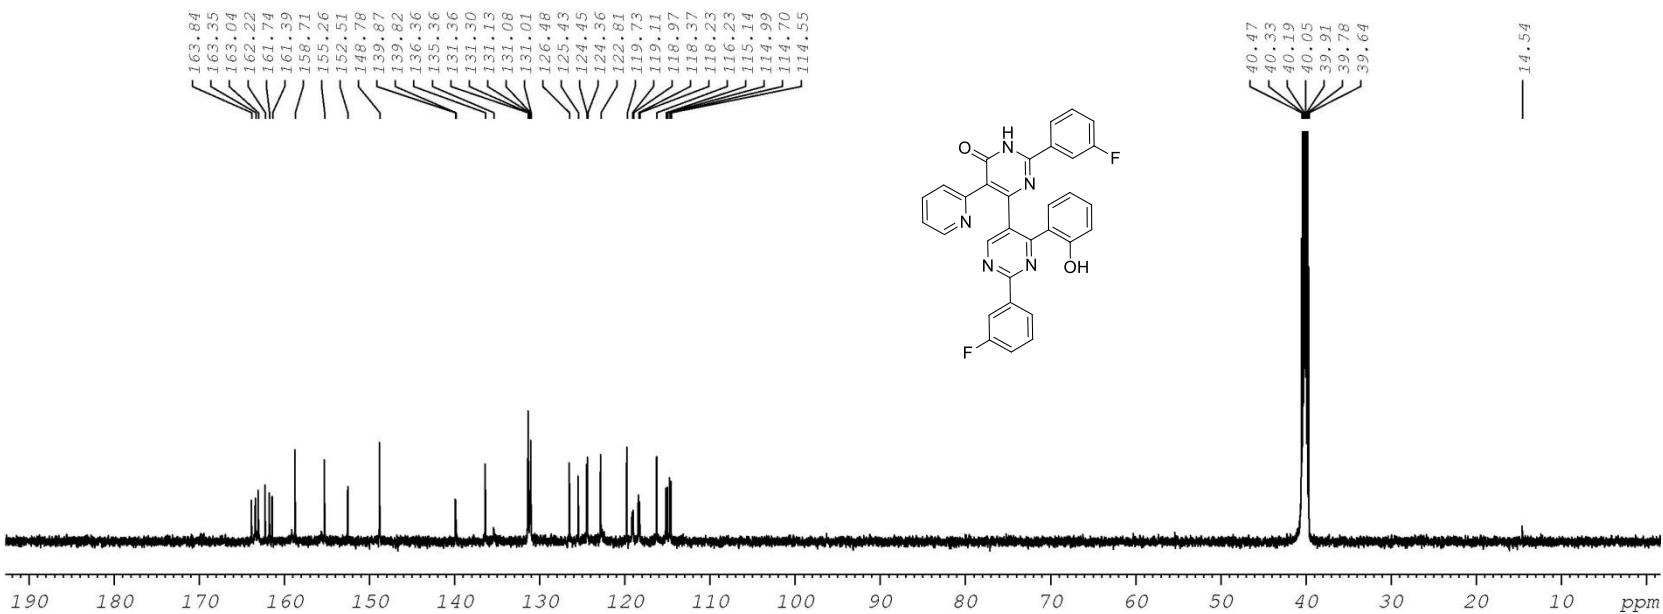

Figure S57.  $^{13}\text{C}$  NMR (150 MHz,  $\text{DMSO-}d_6$ ) spectra of compound 5m

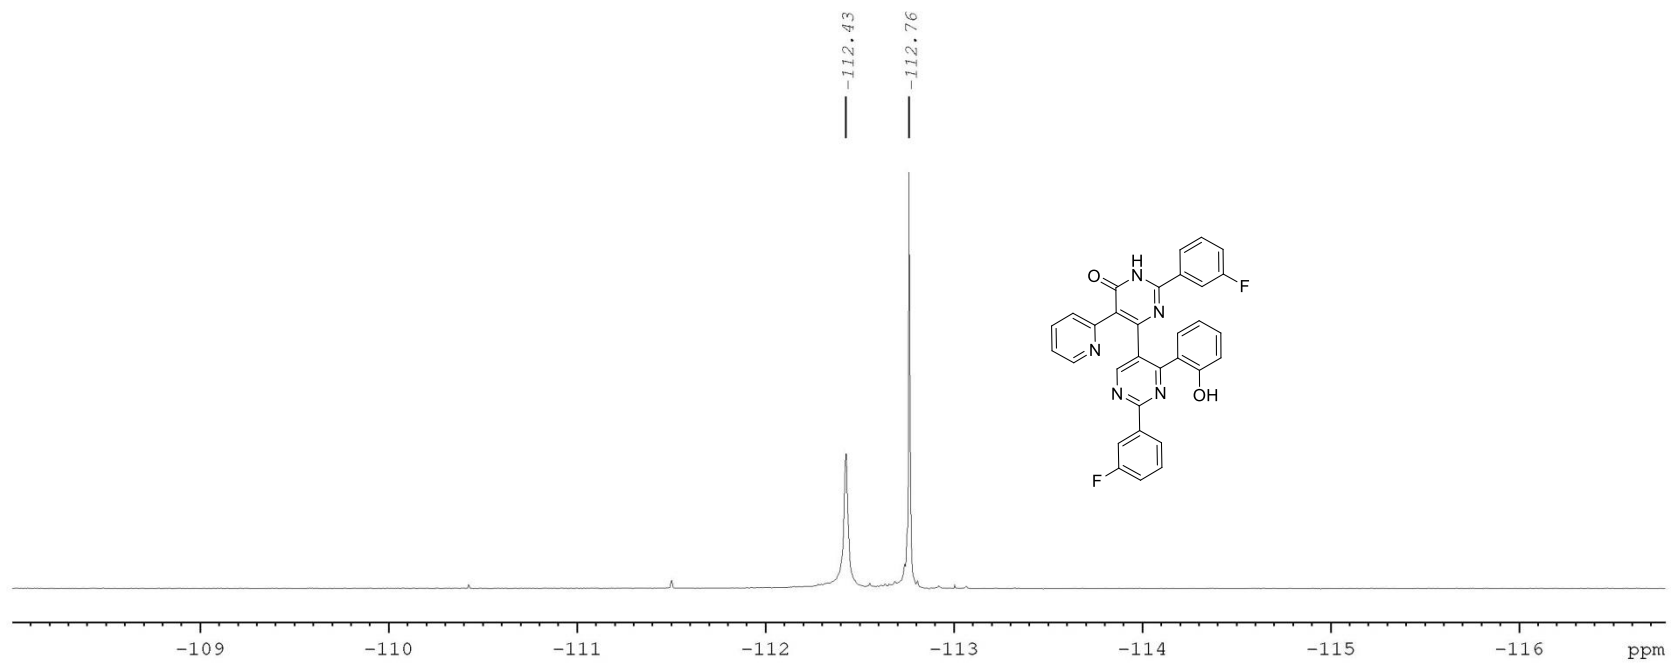

**Figure S58.**  $^{19}\text{F}$  NMR (564 MHz,  $\text{DMSO-}d_6$ ) spectra of compound **5m**

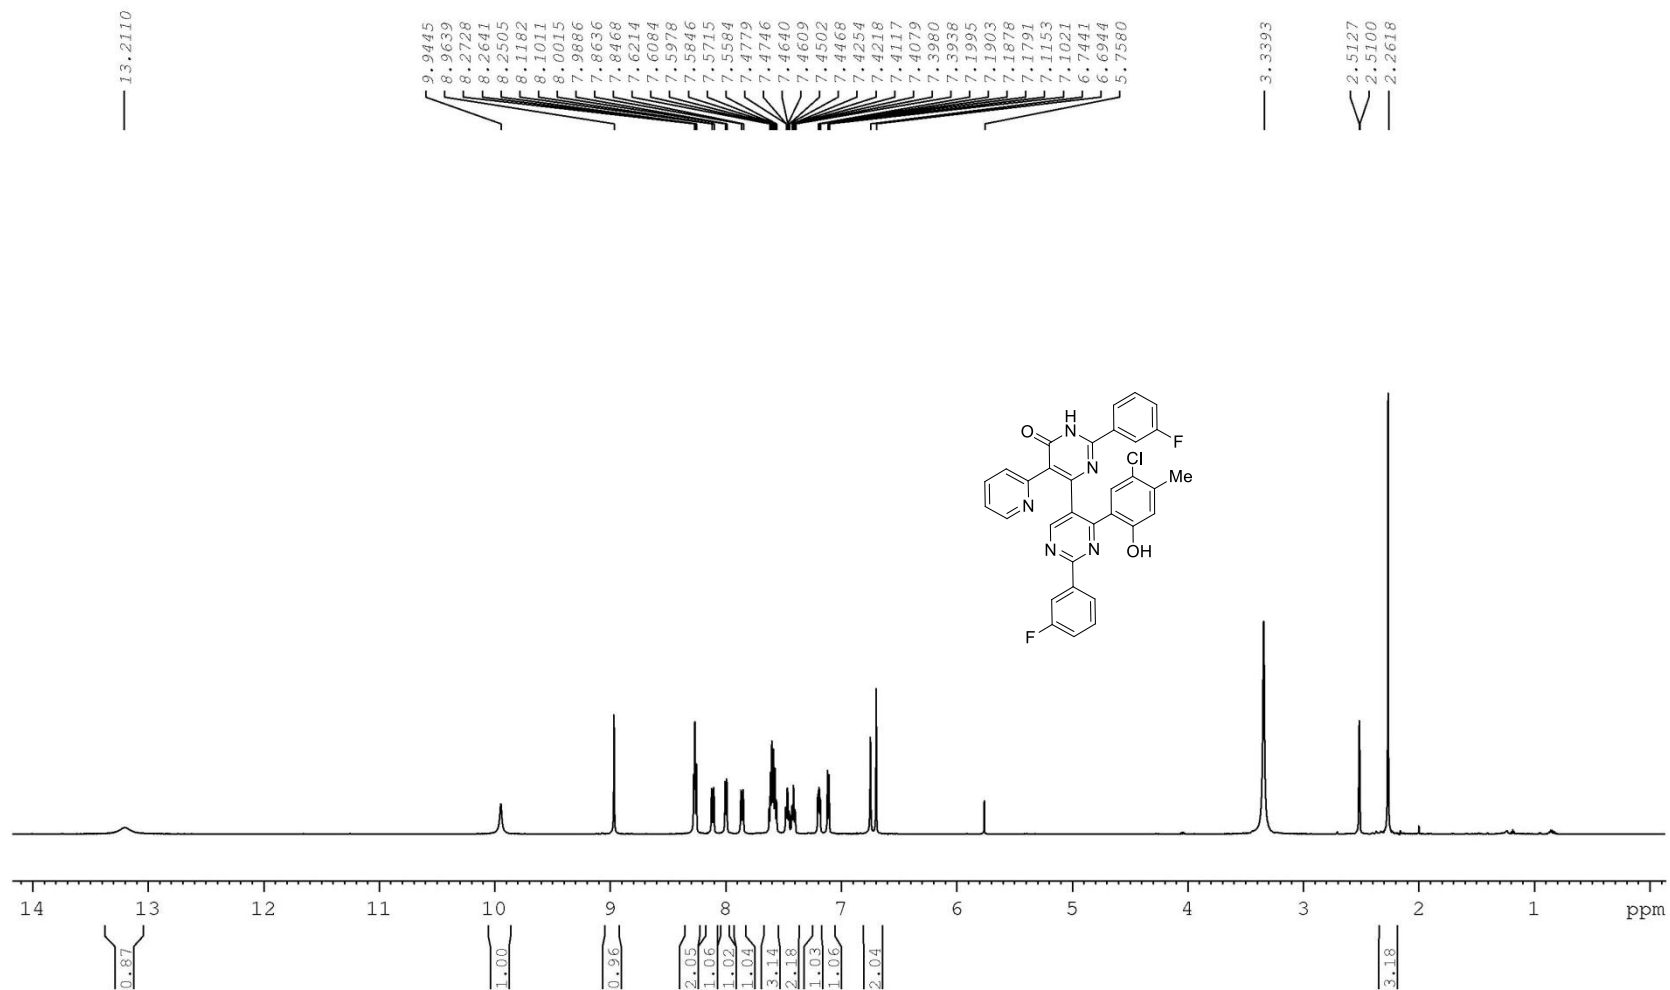

DEPT135

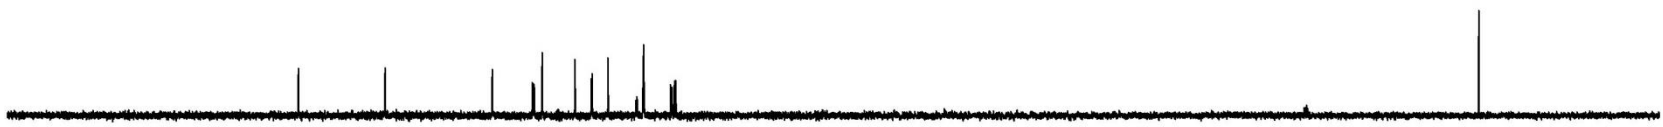

YUNNAN UNIVERSITY ASCEND AVIIIHD600 CLC-23-2  
Sep04-2020-chenli  
C13CPD DMSO

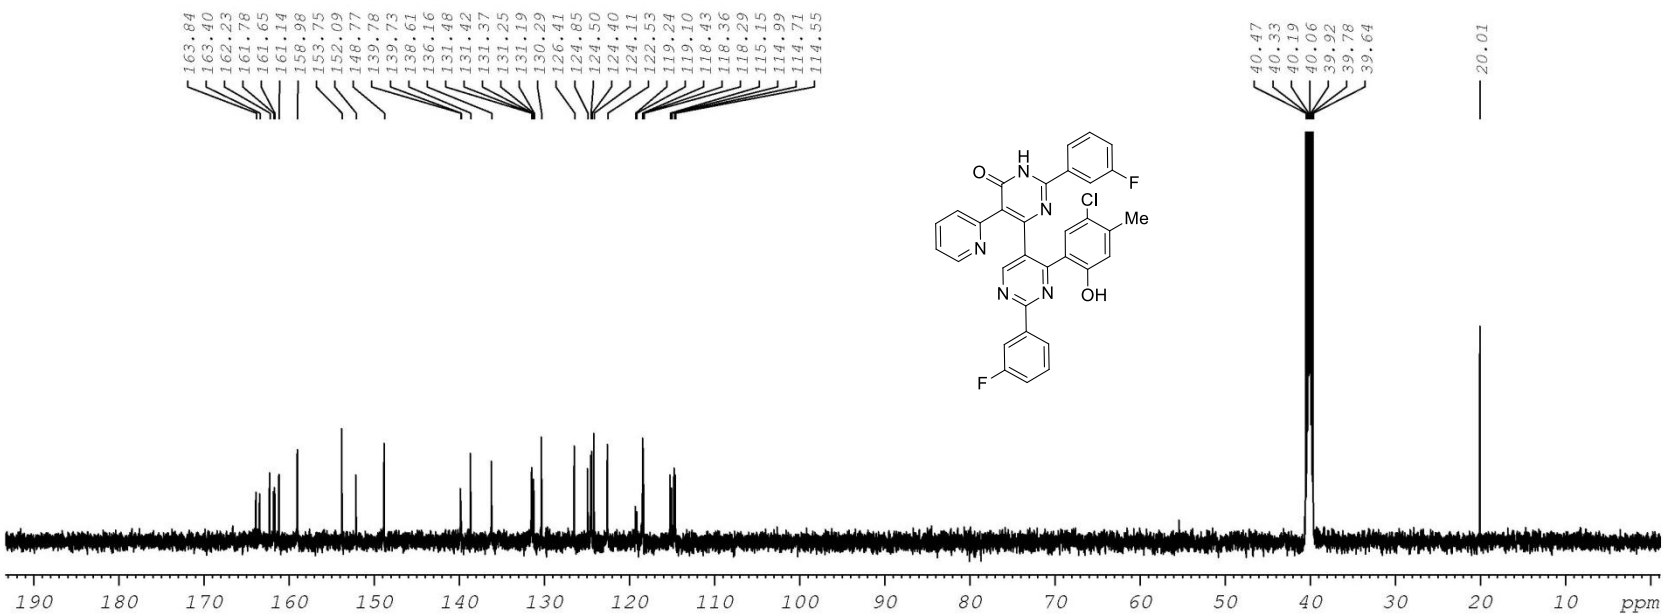

Figure S60.  $^{13}\text{C}$  NMR (150 MHz,  $\text{DMSO-}d_6$ ) spectra of compound 5n

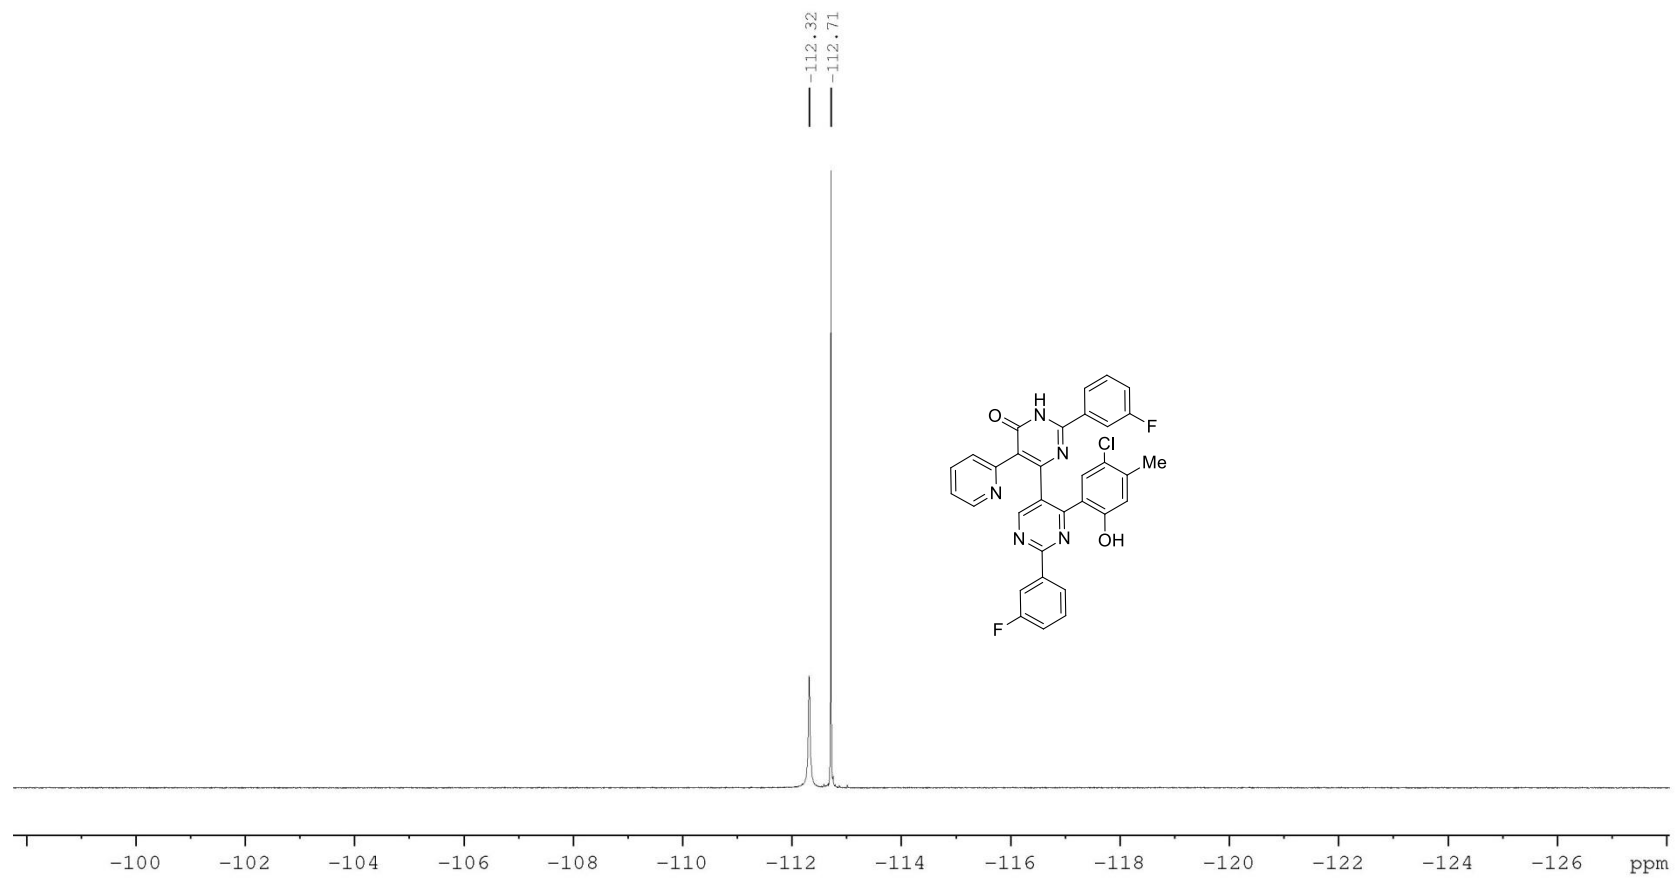

**Figure S61.**  $^{19}\text{F}$  NMR (564 MHz,  $\text{DMSO-}d_6$ ) spectra of compound **5n**

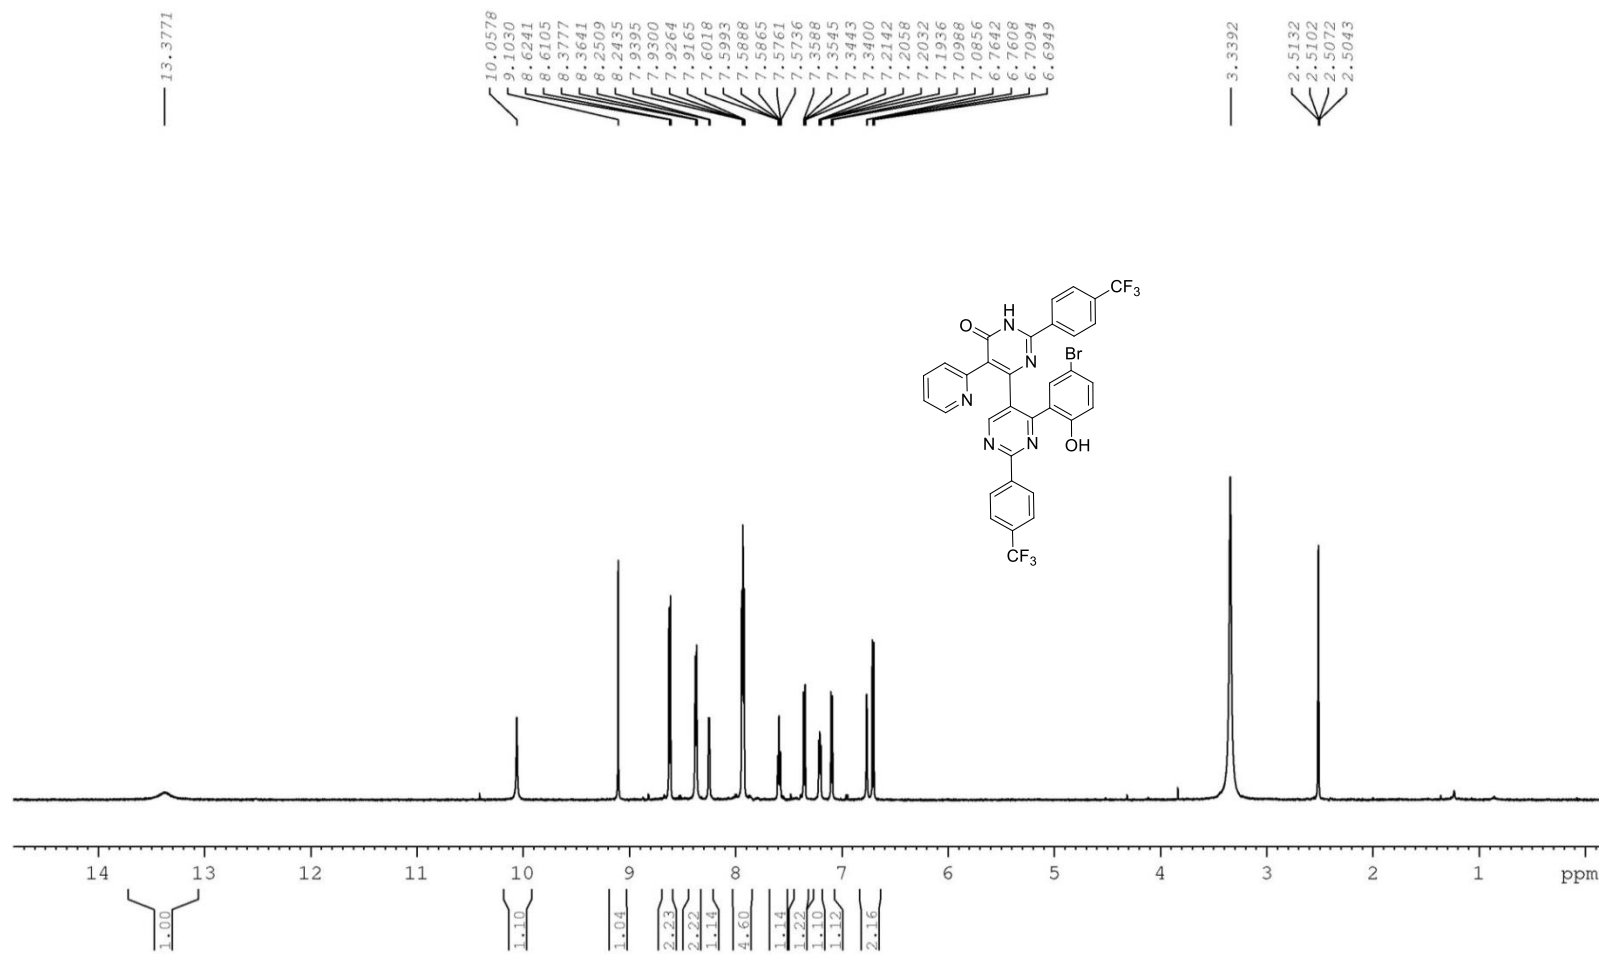

**Figure S62.** <sup>1</sup>H NMR (600 MHz, DMSO-*d*<sub>6</sub>) spectra of compound **5o**

DEPT135

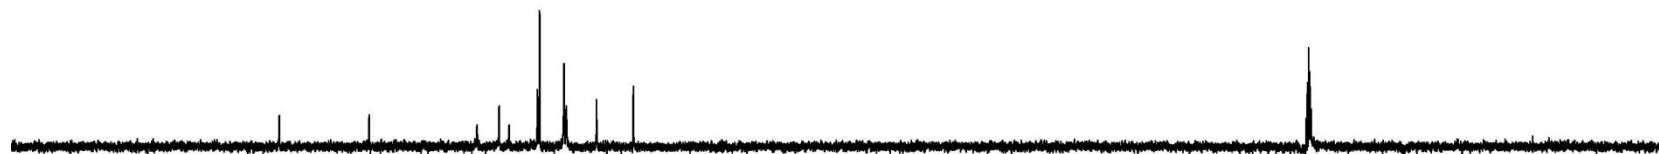

YUNNAN UNIVERSITY ASCEND AVIIIHD600 CLC-16-2  
Nov23-2020-chenli  
C13CPD DMSO

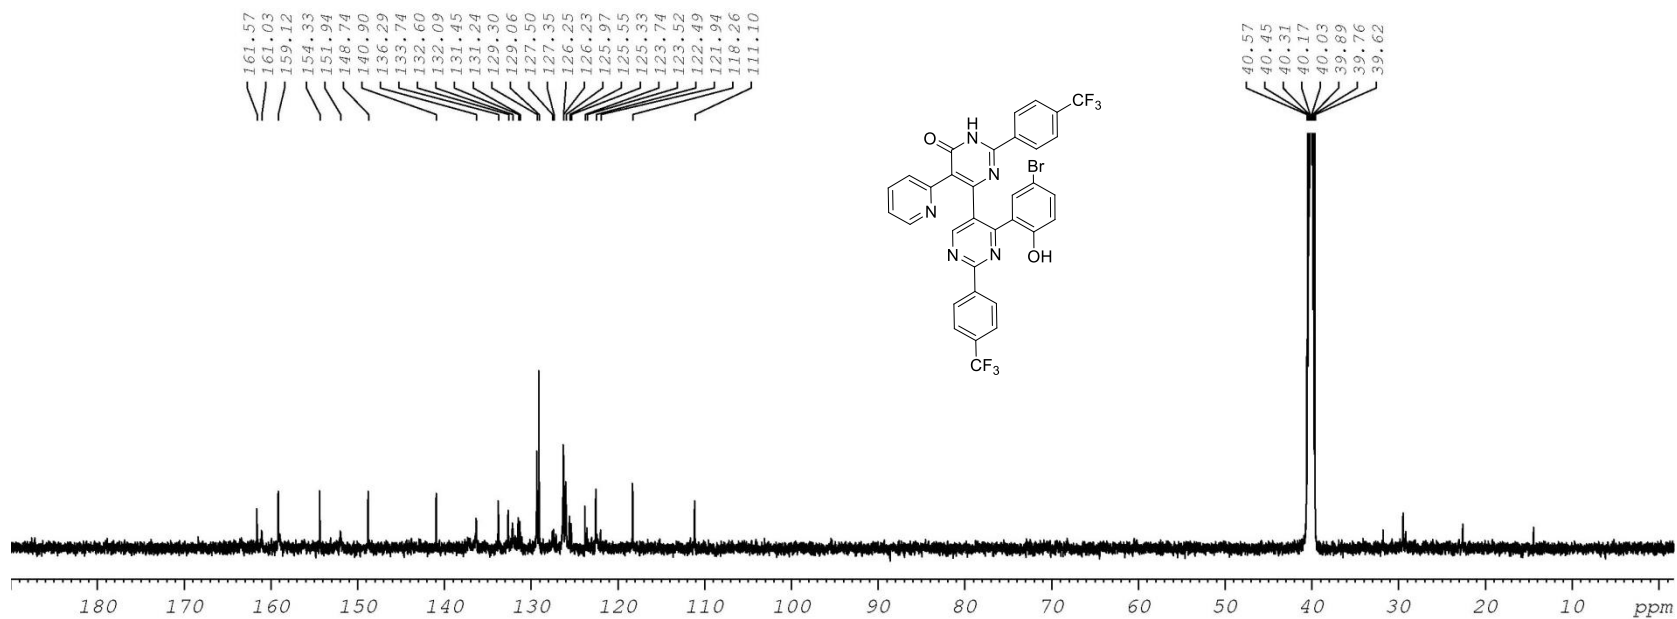

Figure S63.  $^{13}\text{C}$  NMR (150 MHz,  $\text{DMSO-}d_6$ ) spectra of compound **5o**

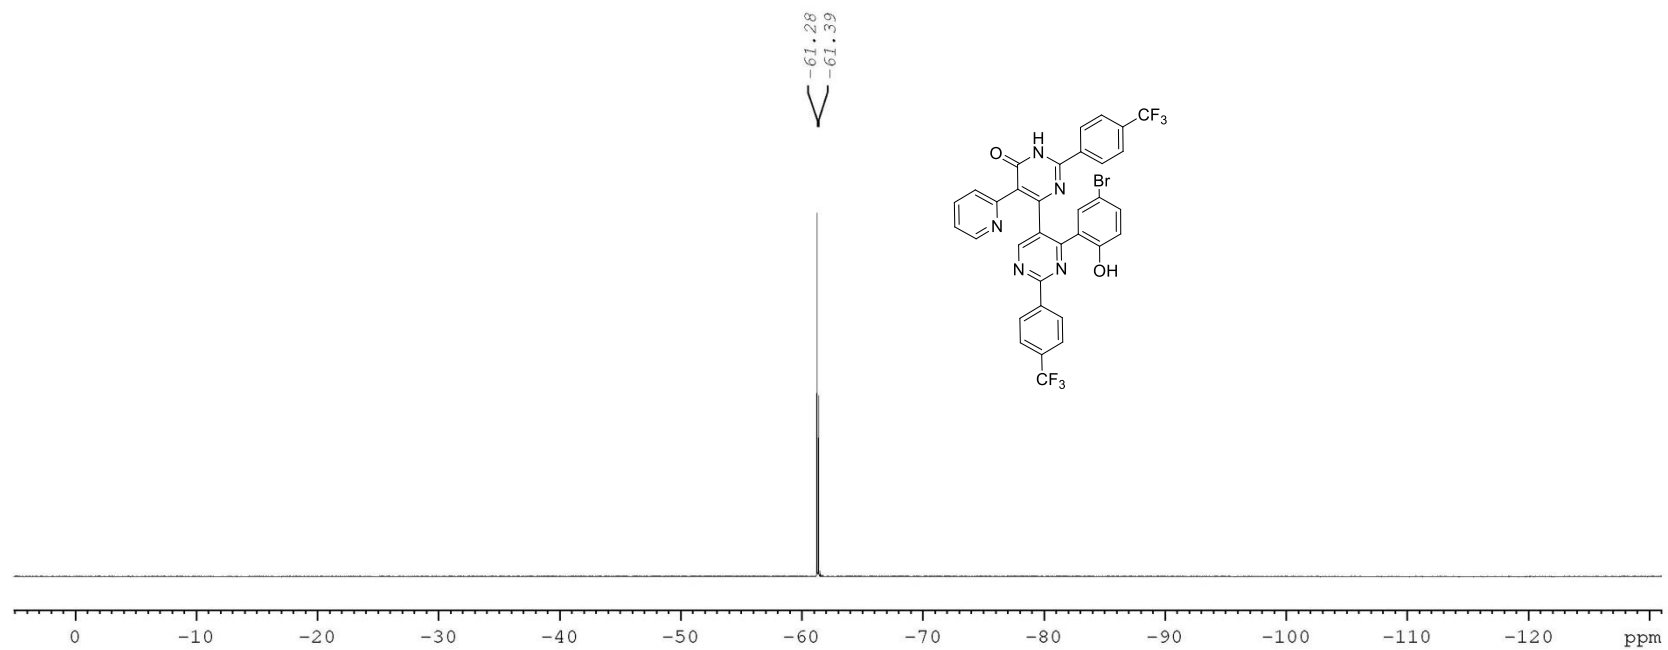

**Figure S64.**  $^{19}\text{F}$  NMR (564 MHz,  $\text{DMSO-}d_6$ ) spectra of compound **5o**



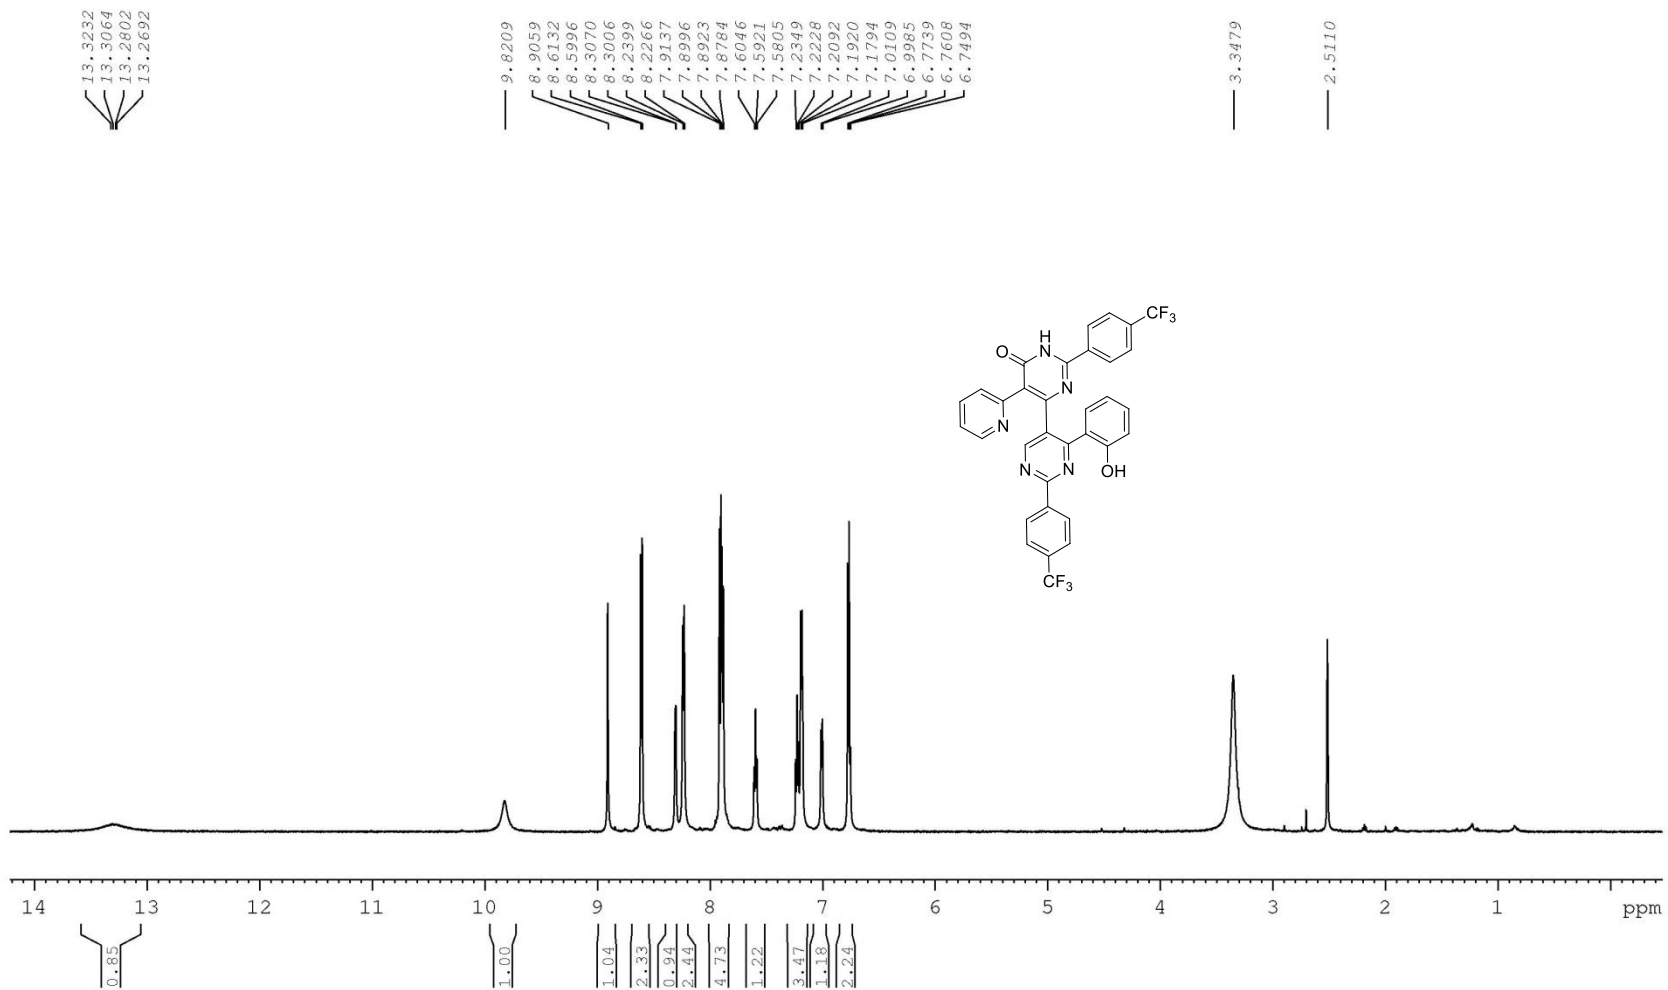

**Figure S65.** <sup>1</sup>H NMR (600 MHz, DMSO-*d*<sub>6</sub>) spectra of compound **5p**

DEPT135

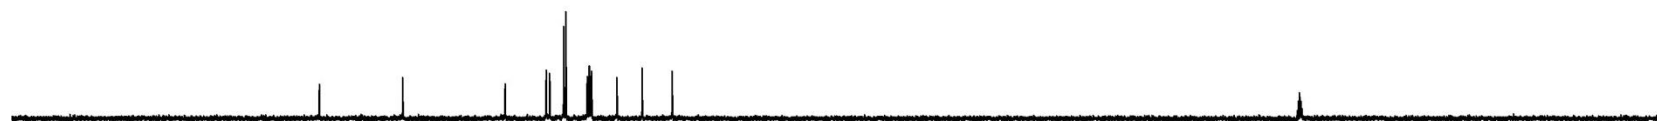

YUNNAN UNIVERSITY ASCEND AVIIIHD600 CLC-17-2  
Nov23-2020-chenli  
C13CPD DMSO

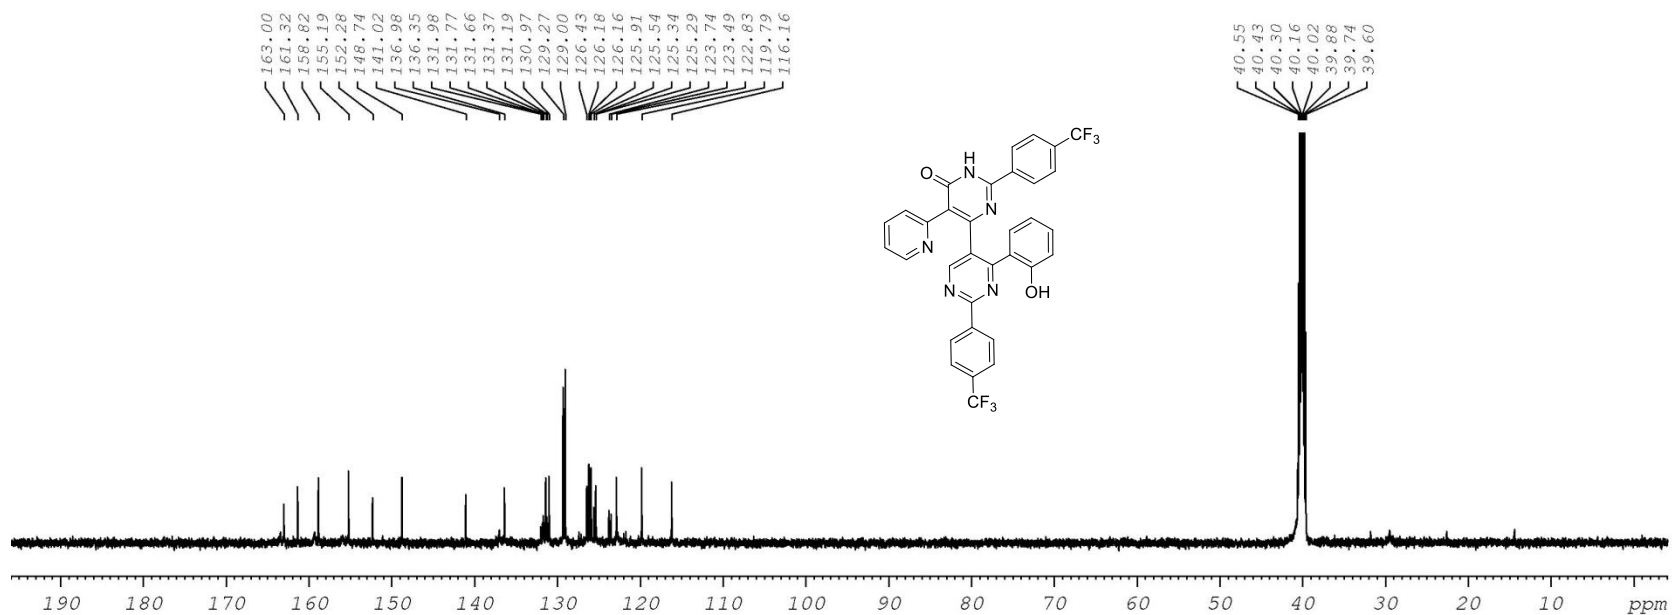

Figure S66.  $^{13}\text{C}$  NMR (150 MHz,  $\text{DMSO-}d_6$ ) spectra of compound **5p**

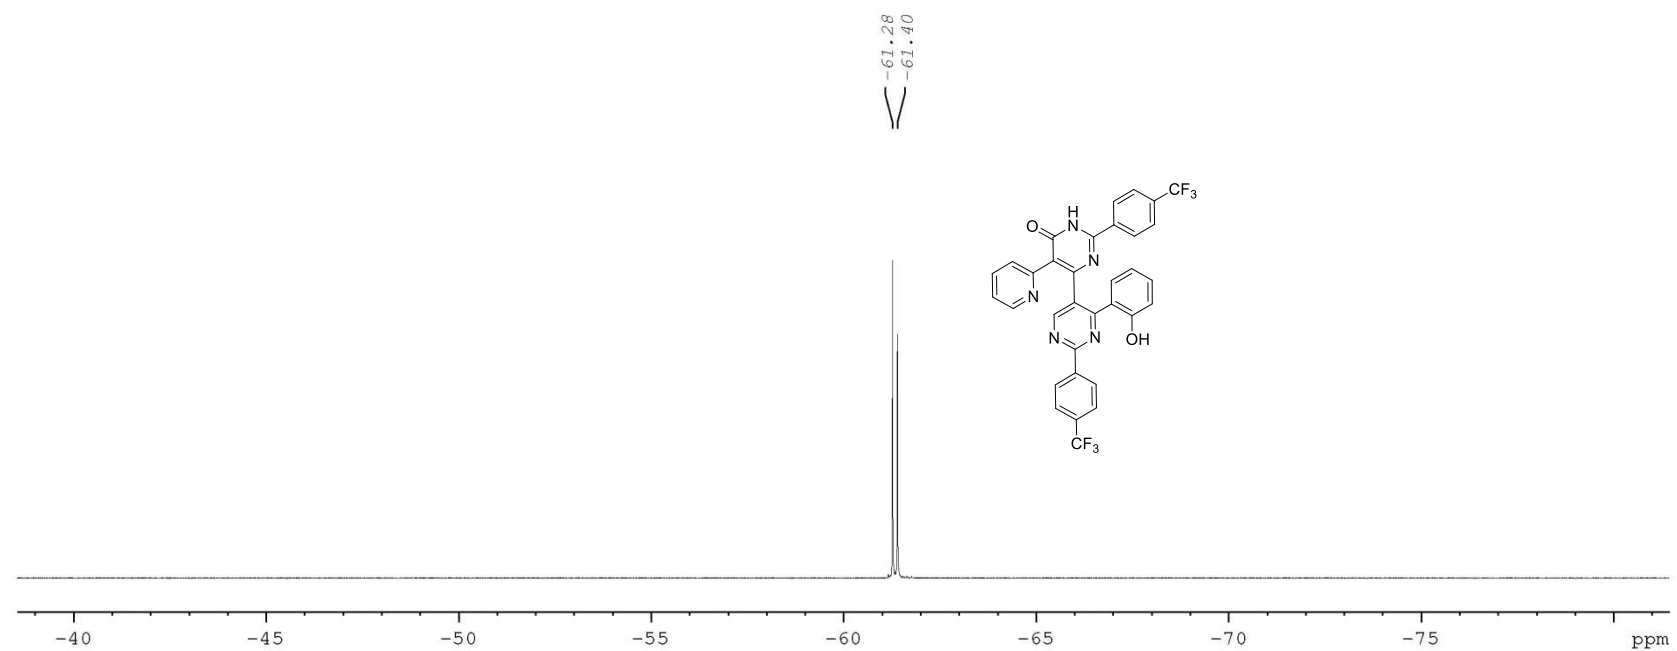

**Figure S67.**  $^{19}\text{F}$  NMR (564 MHz,  $\text{DMSO-}d_6$ ) spectra of compound **5p**

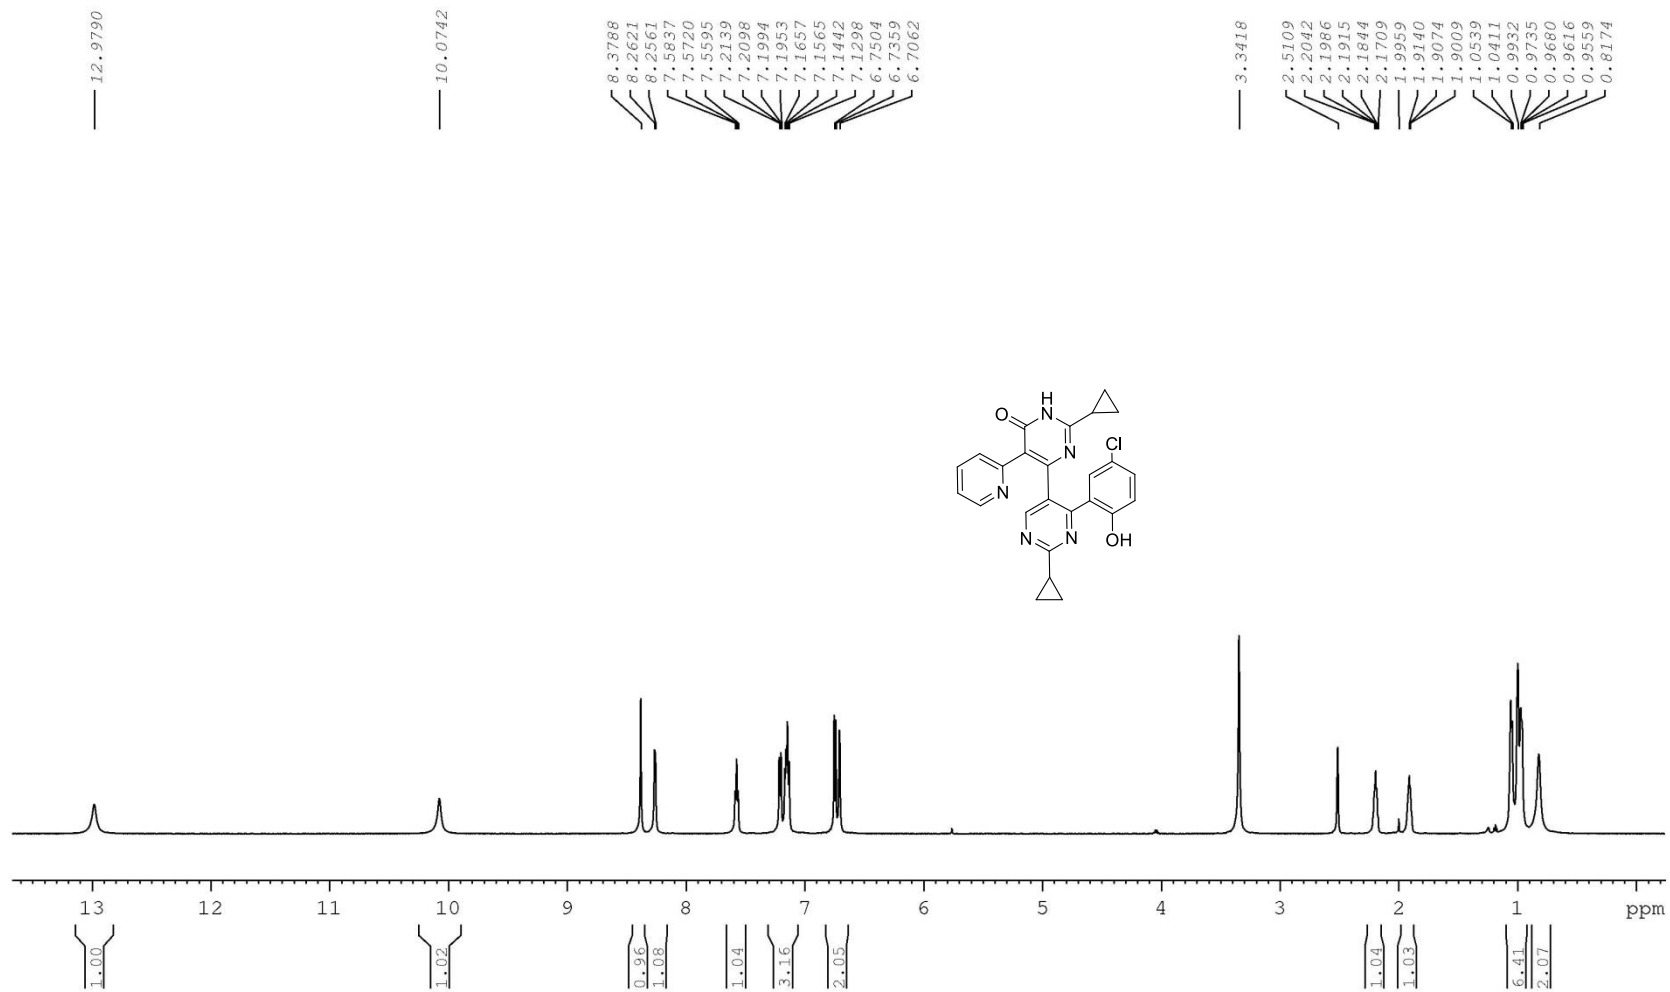

**Figure S68.** <sup>1</sup>H NMR (600 MHz, DMSO-*d*<sub>6</sub>) spectra of compound **5q**

DEPT135

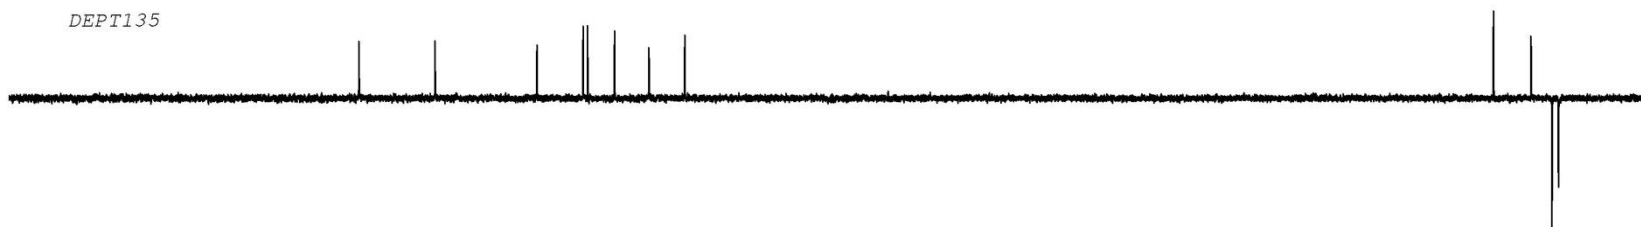

YUNNAN UNIVERSITY ASCEND AVIIIHD600 CLC-11-2  
Aug24-2020-chenli  
C13CPD DMSO

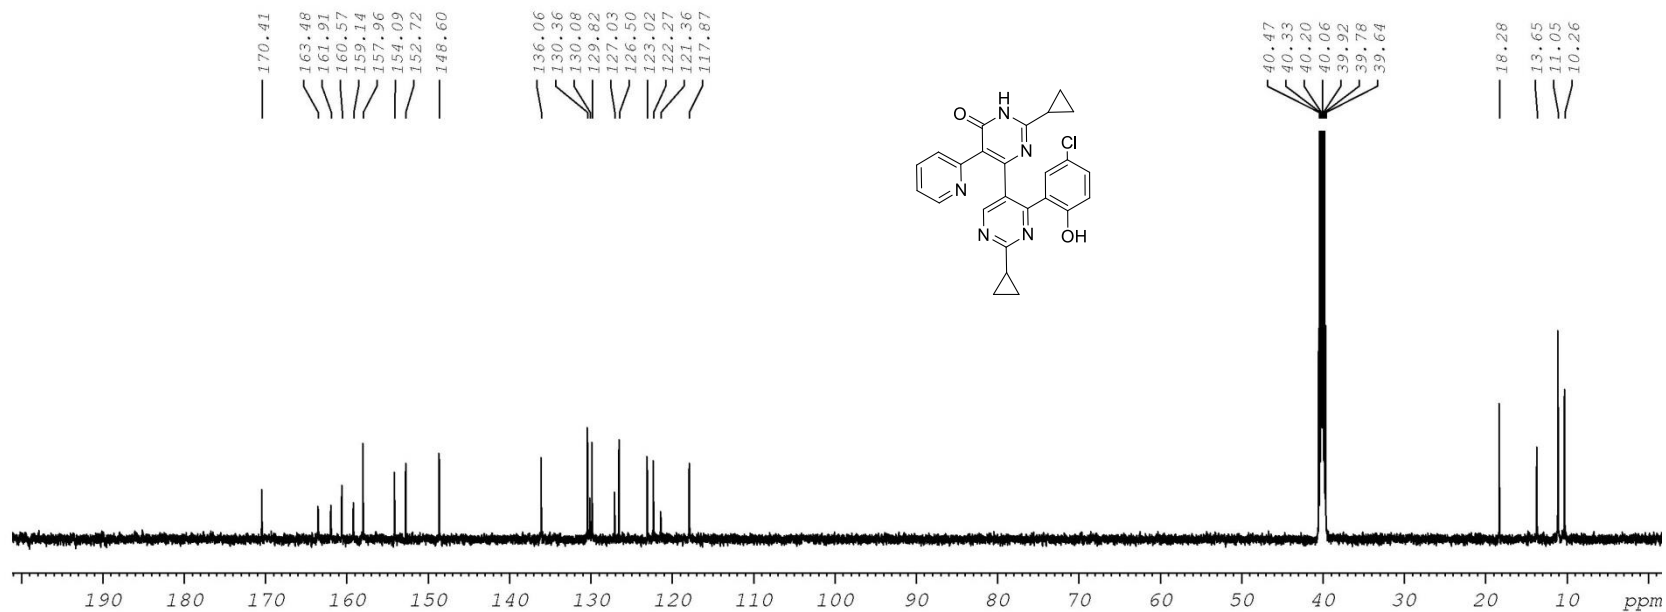

Figure S69.  $^{13}\text{C}$  NMR (150 MHz,  $\text{DMSO-}d_6$ ) spectra of compound 5q

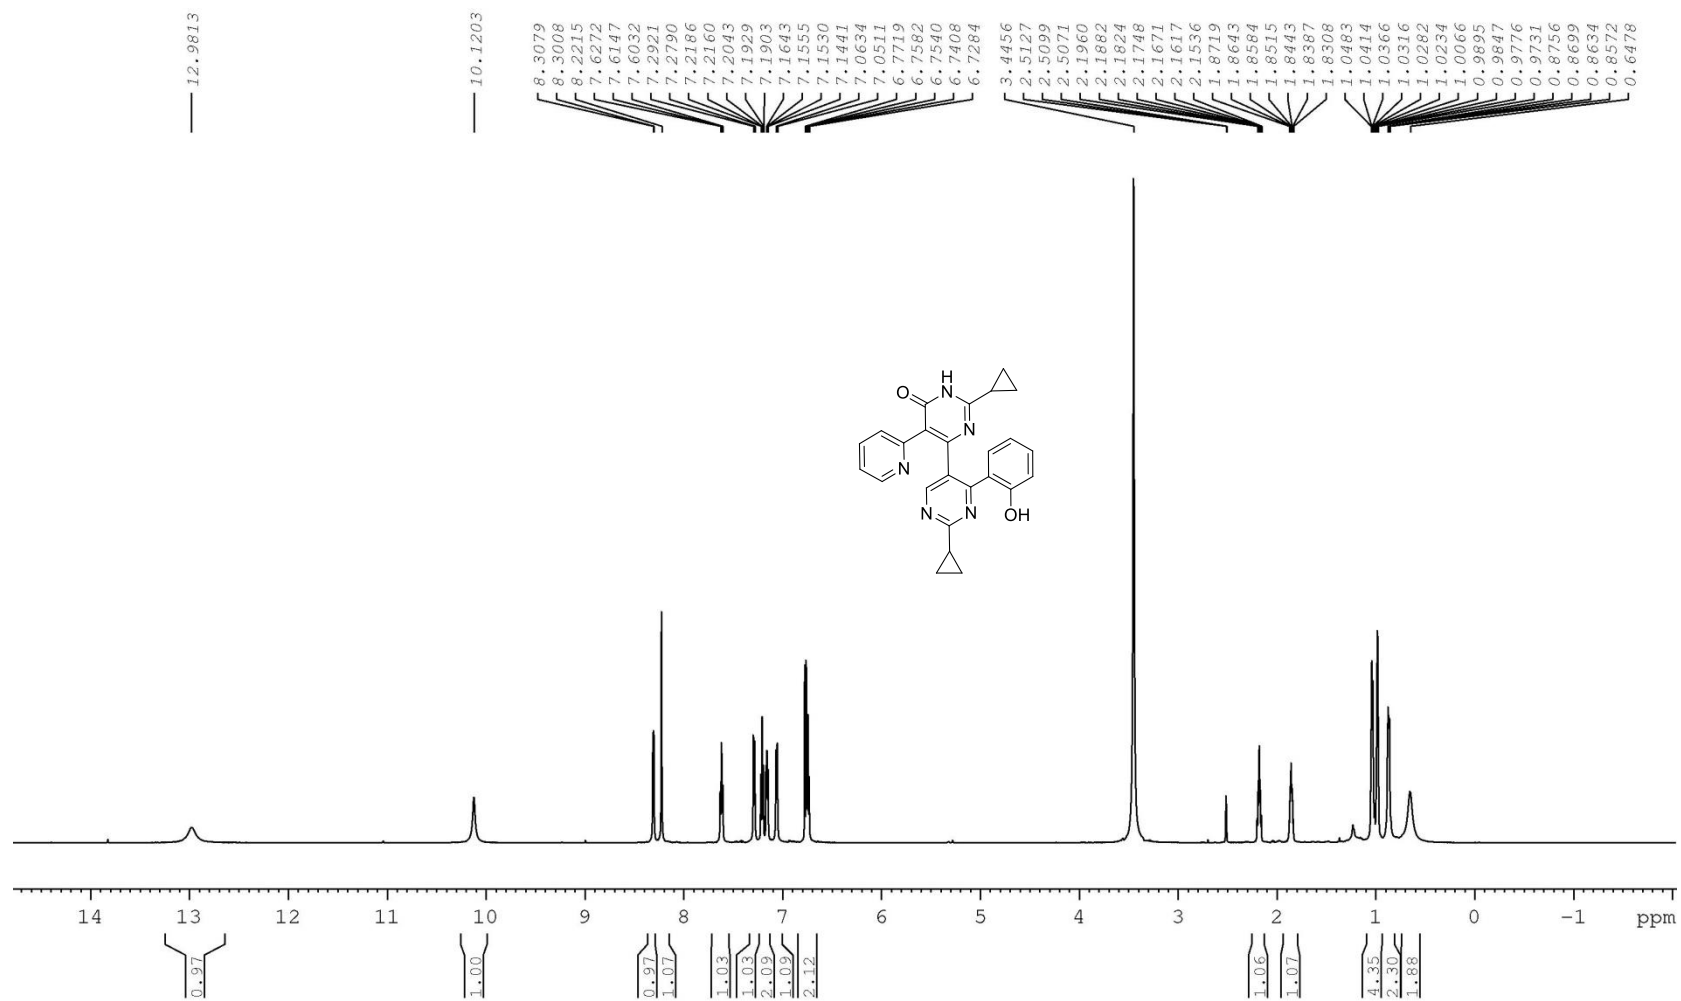

**Figure S70.**  $^1\text{H}$  NMR (564 MHz,  $\text{DMSO-}d_6$ ) spectra of compound **5r**

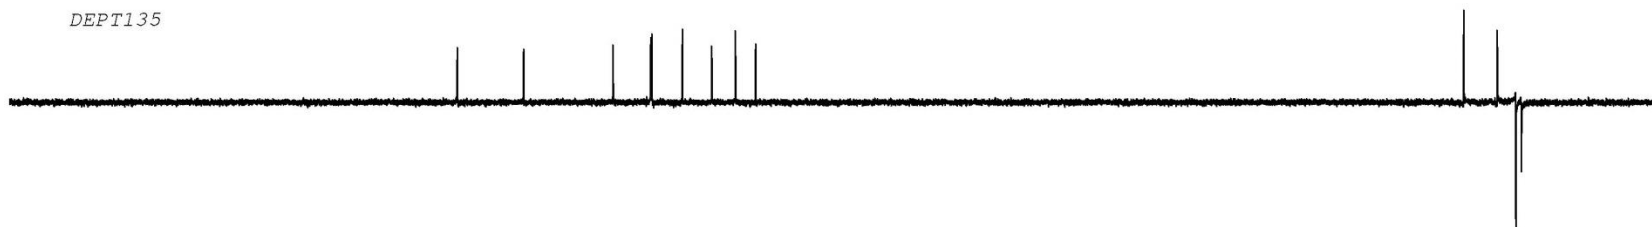

YUNNAN UNIVERSITY ASCEND AVIIIHD600 CLC-02-2  
 Sep03-2020-chenli  
 C13CPD DMSO

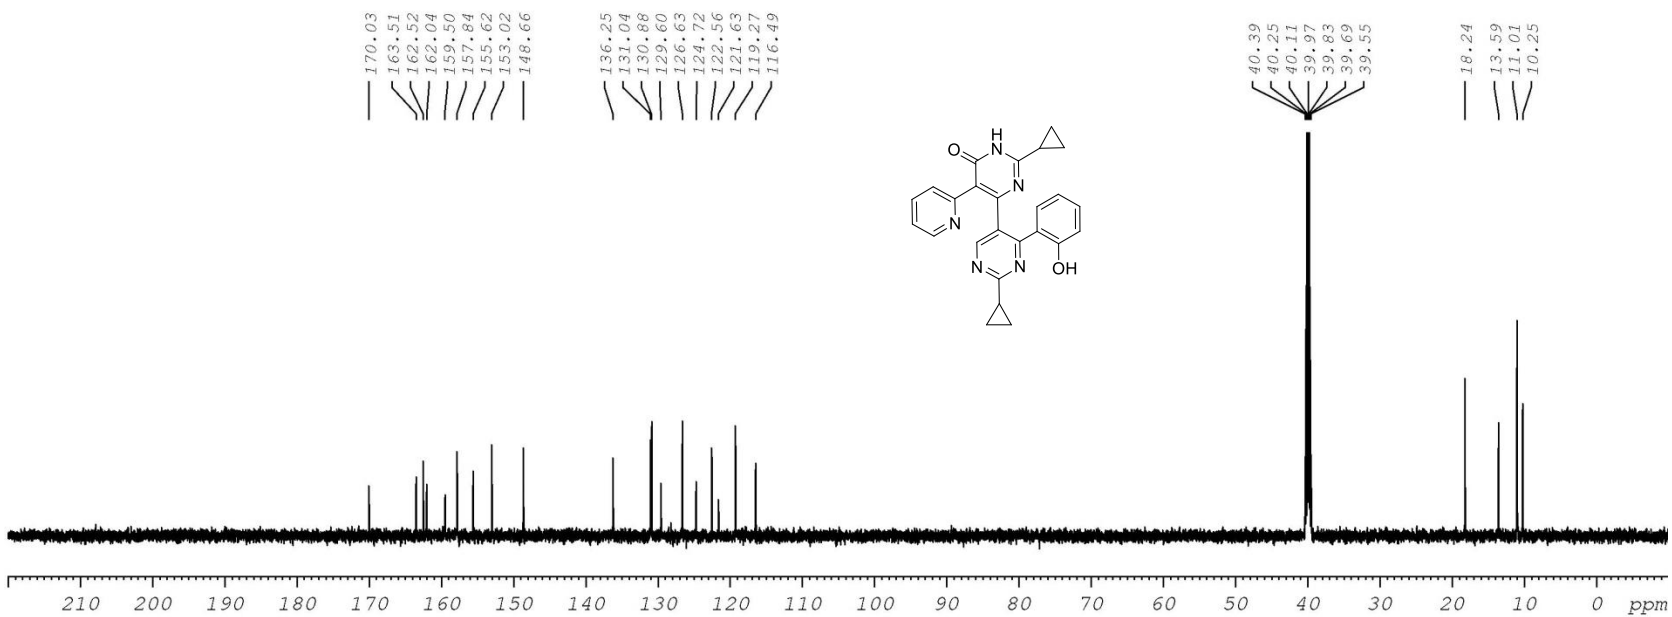

Figure S71.  $^{13}\text{C}$  NMR (150 MHz,  $\text{DMSO-}d_6$ ) spectra of compound 5r

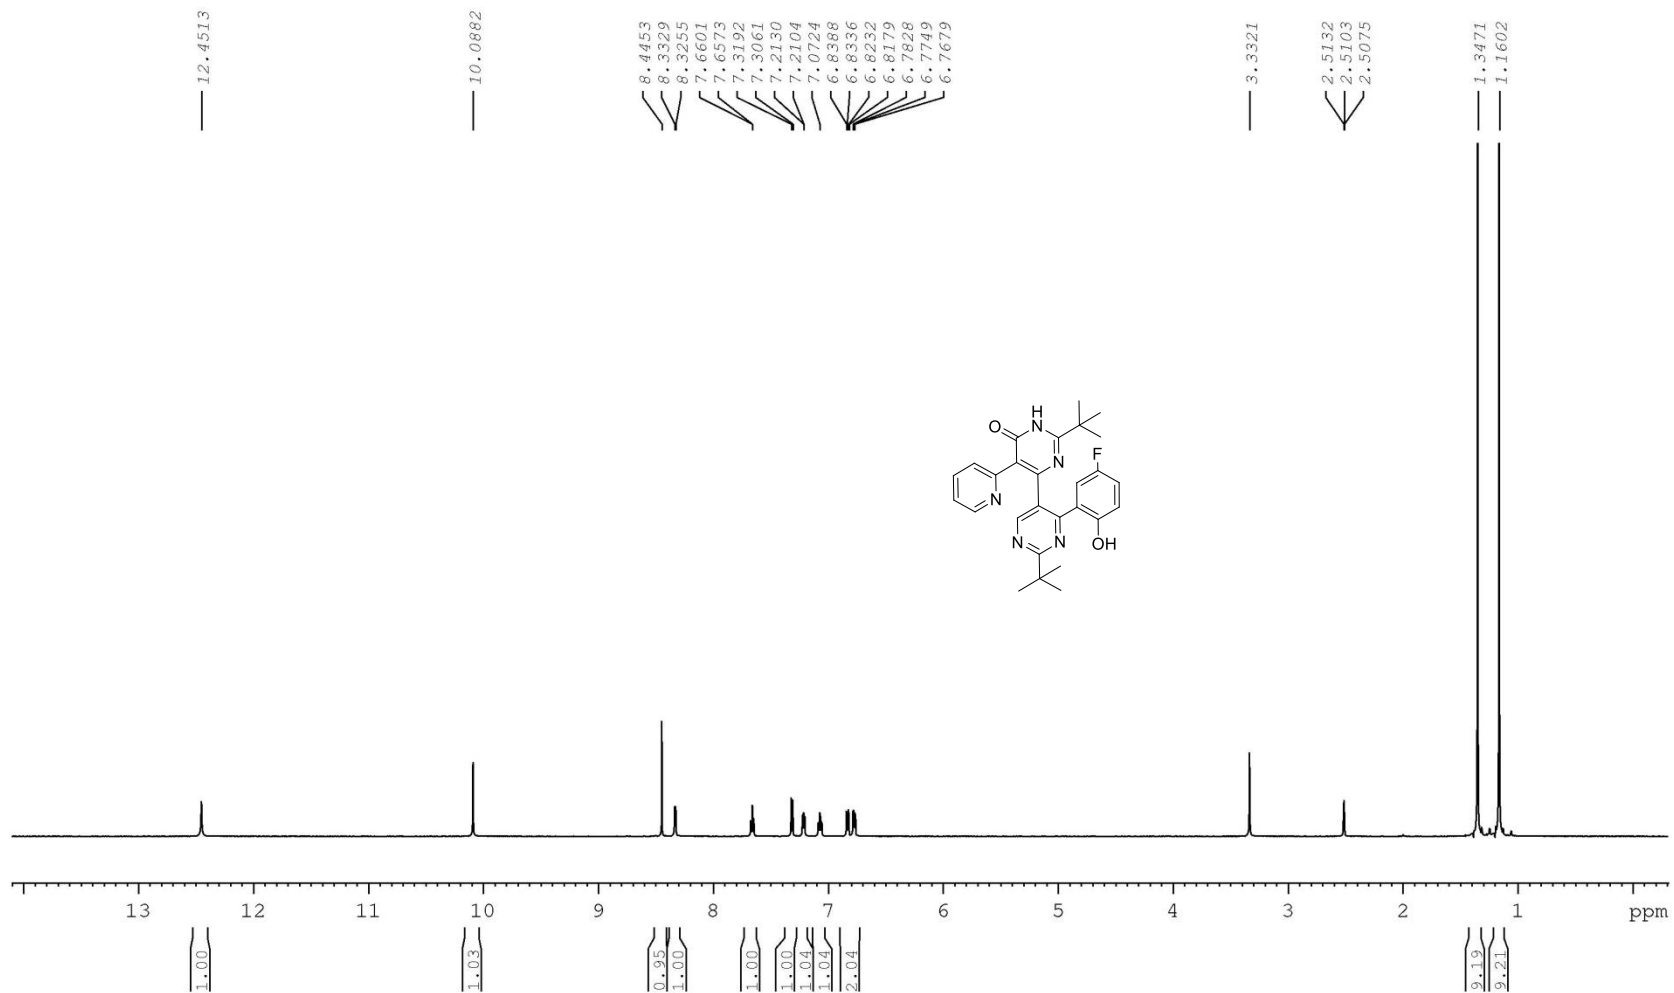

**Figure S72.** <sup>1</sup>H NMR (600 MHz, DMSO-*d*<sub>6</sub>) spectra of compound 5s



DEPT135

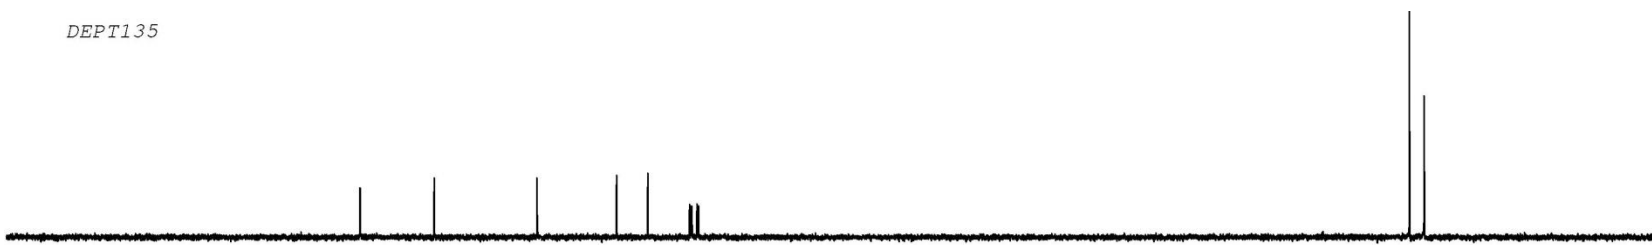

YUNNAN UNIVERSITY ASCEND AVIIIHD600 CLC-13-2  
Aug24-2020-chenli  
C13CPD DMSO

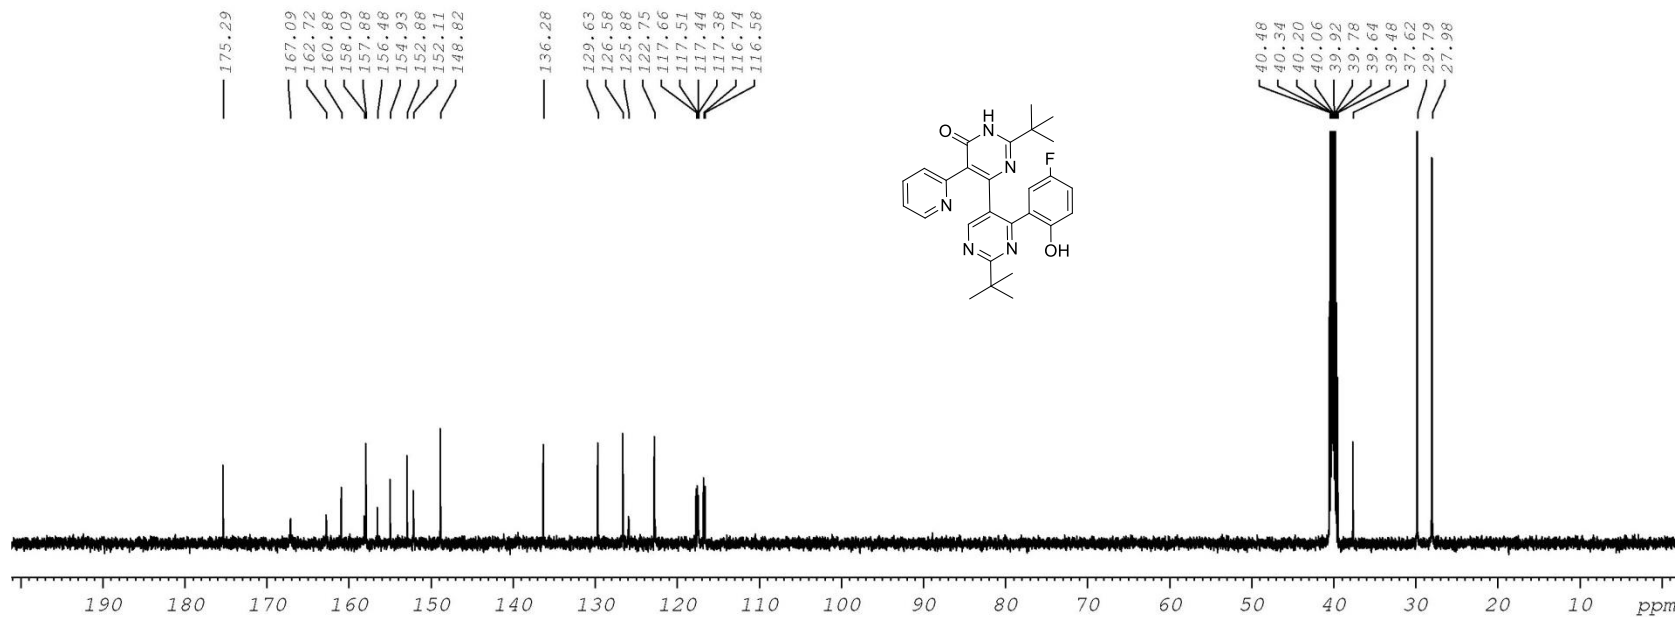

Figure S73.  $^{13}\text{C}$  NMR (150 MHz,  $\text{DMSO-}d_6$ ) spectra of compound 5s

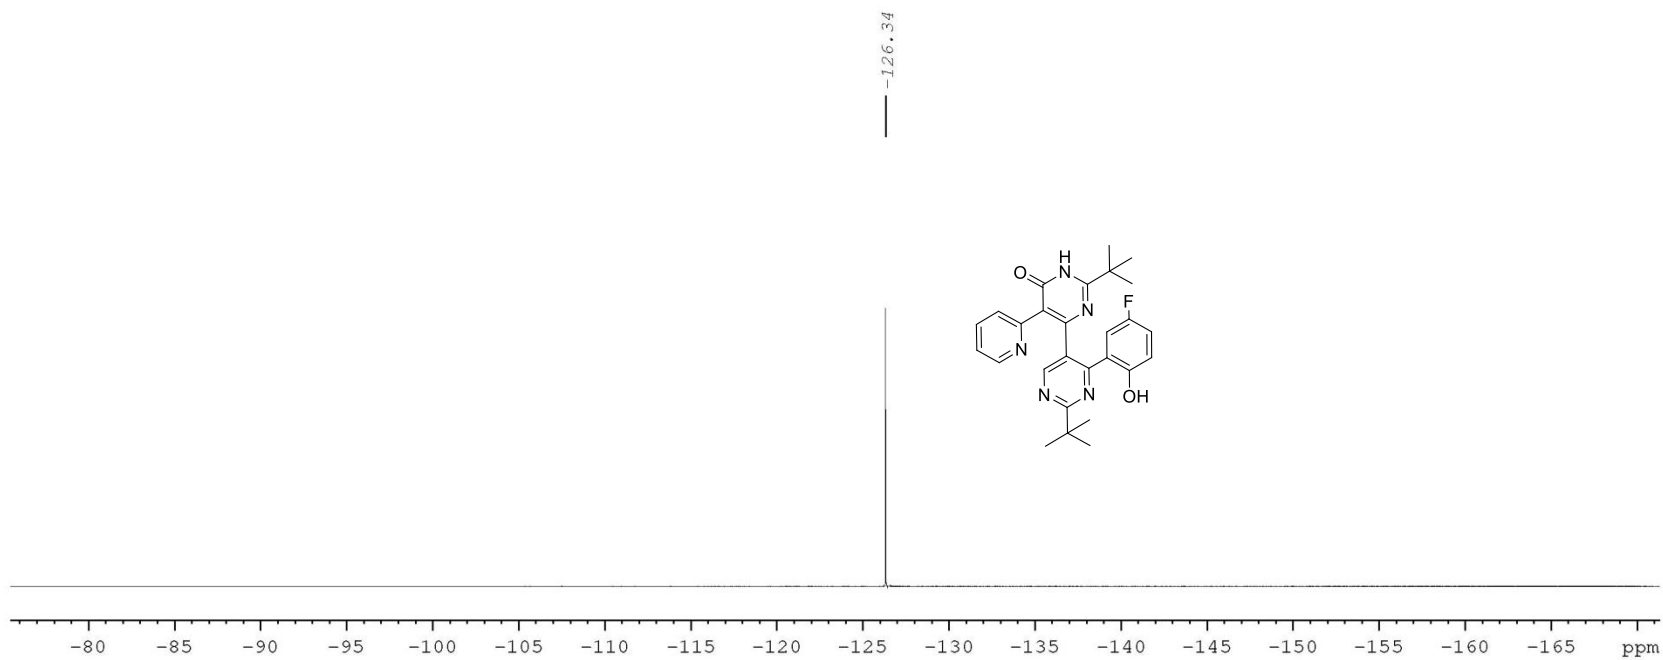

**Figure S74.**  $^{19}\text{F}$  NMR (564 MHz,  $\text{DMSO-}d_6$ ) spectra of compound **5s**

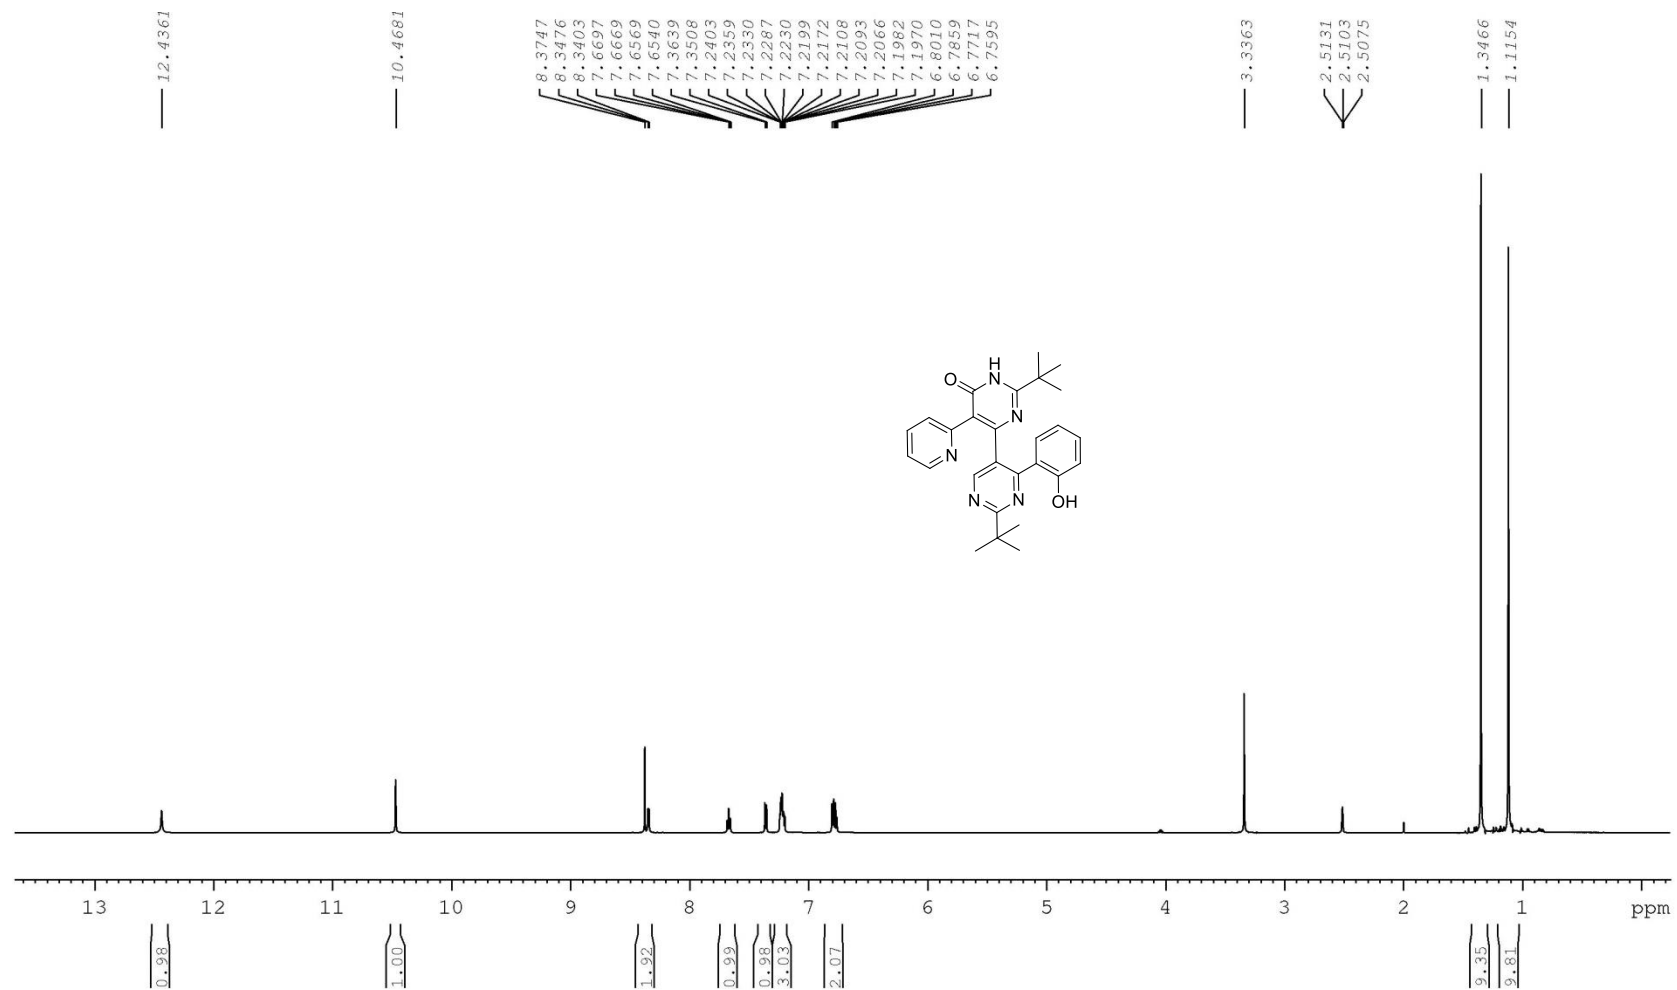

**Figure S75.** <sup>1</sup>H NMR (600 MHz, DMSO-*d*<sub>6</sub>) spectra of compound 5t

DEPT135

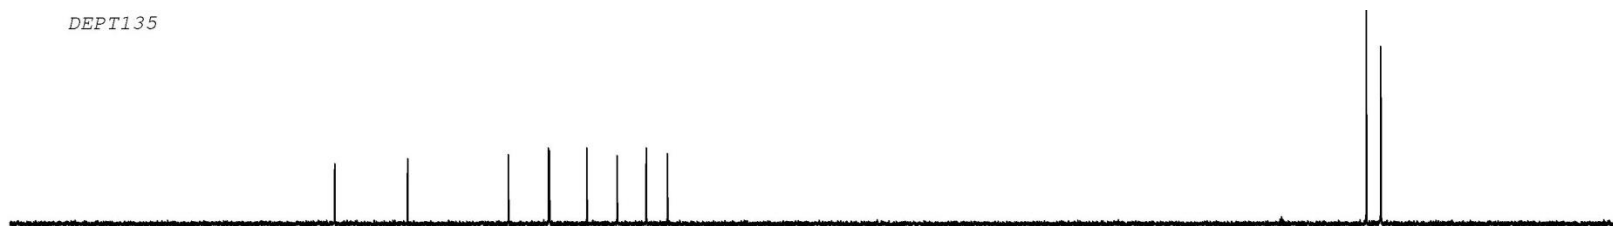

YUNNAN UNIVERSITY ASCEND AVIIIHD600 CLC-15-2  
Aug24-2020-chenli  
C13CPD DMSO

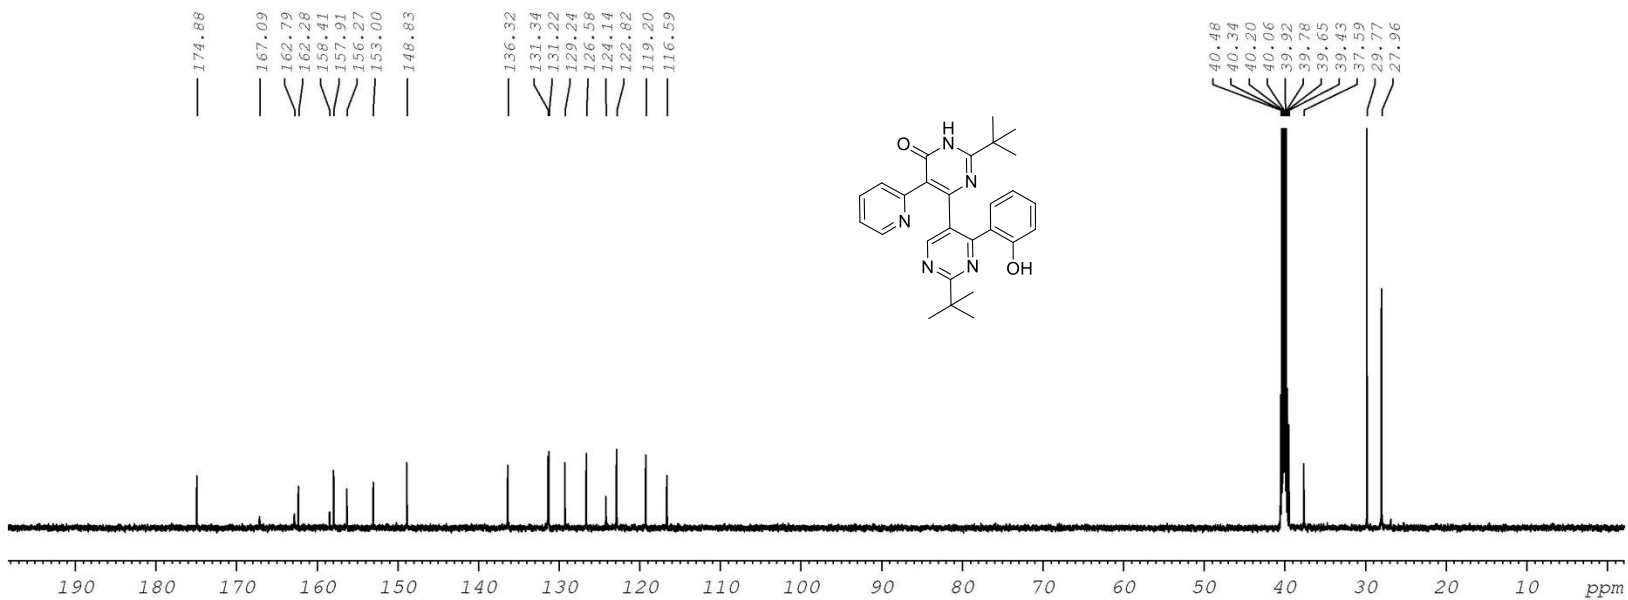

Figure S76.  $^{13}\text{C}$  NMR (150 MHz,  $\text{DMSO}-d_6$ ) spectra of compound 5t

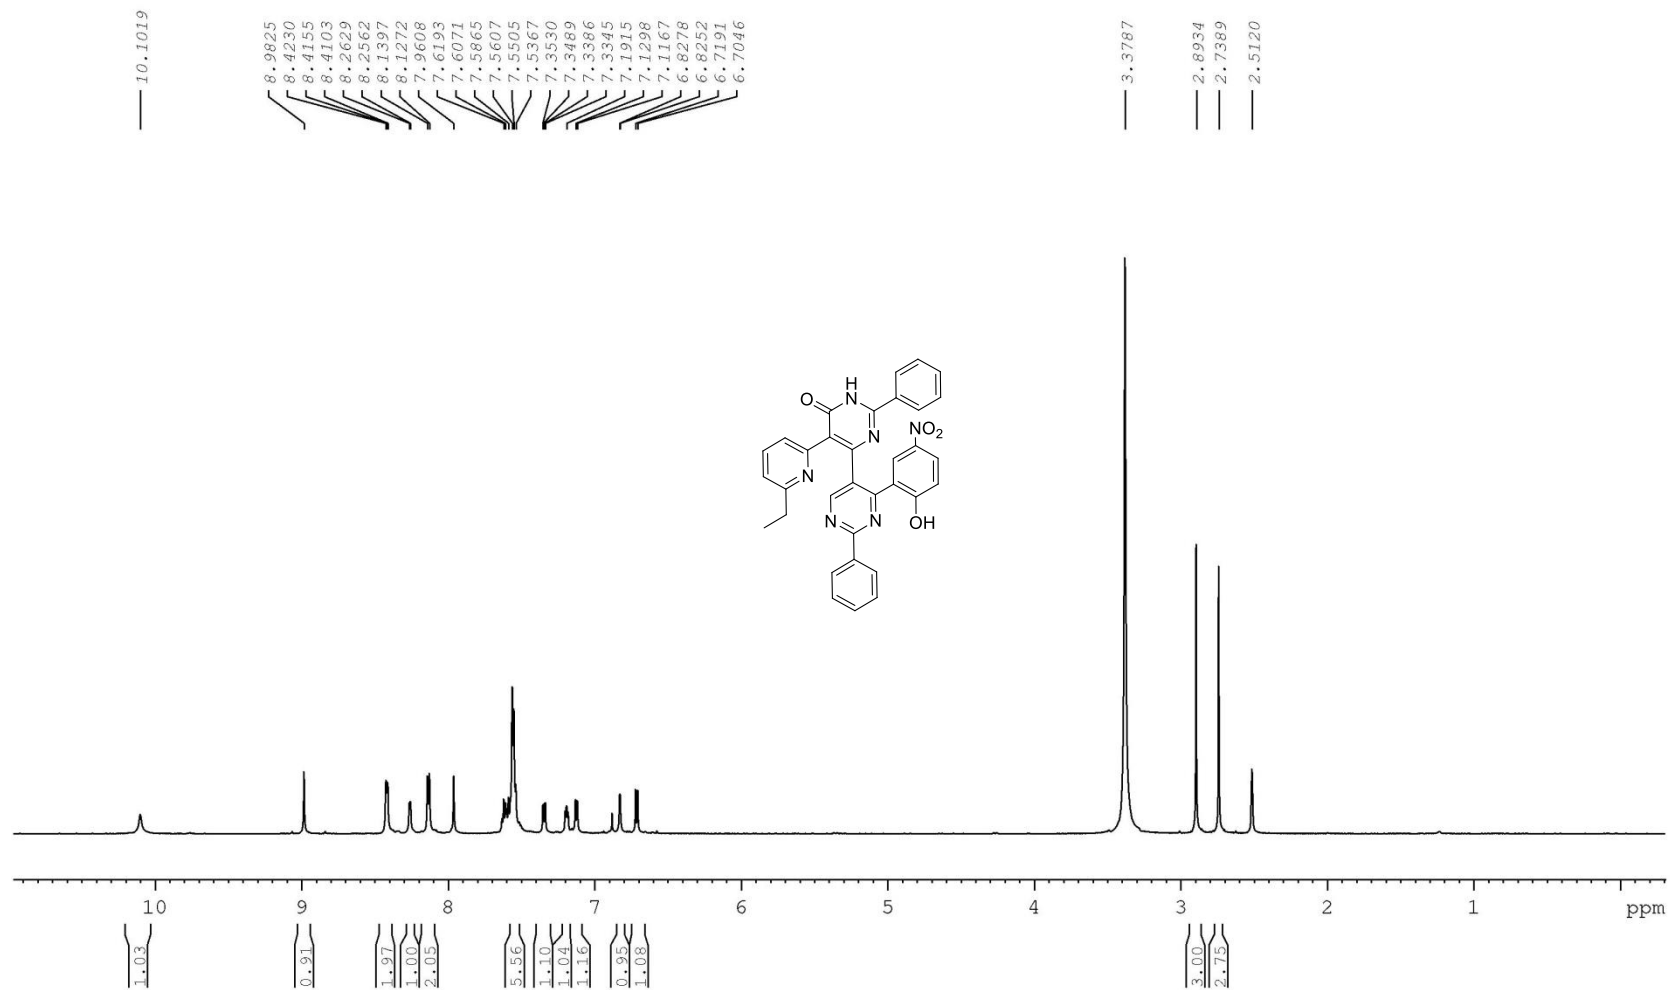

**Figure S77.**  $^1\text{H NMR}$  (600 MHz,  $\text{DMSO-}d_6$ ) spectra of compound **5u**

DEPT135

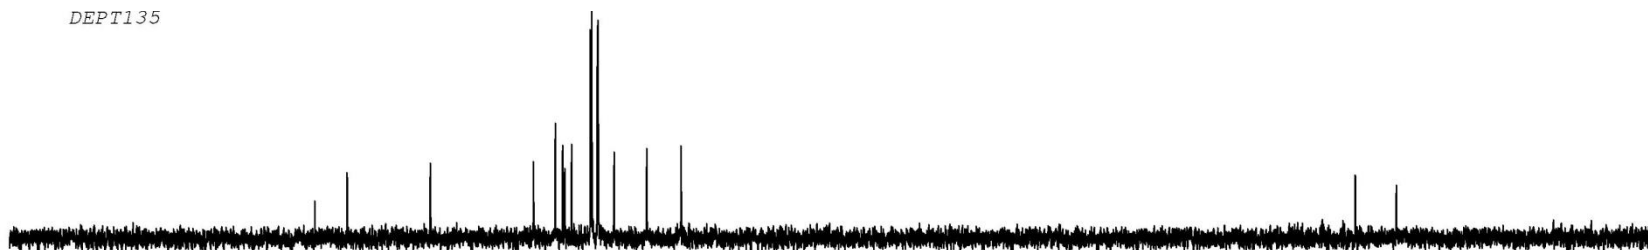

YUNNAN UNIVERSITY ASCEND AVIIIHD600 CLC-04  
Jun01-2020-chenli  
C13CPD DMSO

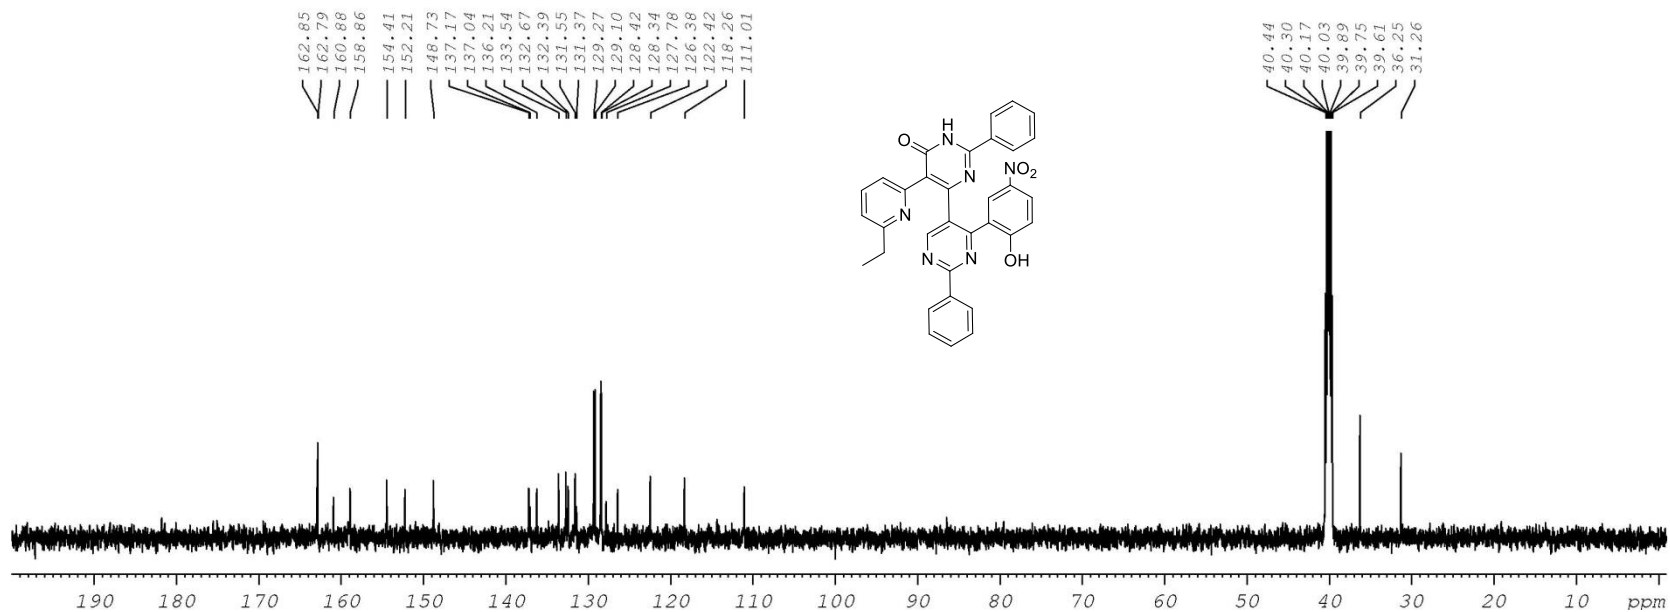

Figure S78.  $^{13}\text{C}$  NMR (150 MHz,  $\text{DMSO}-d_6$ ) spectra of compound 5u

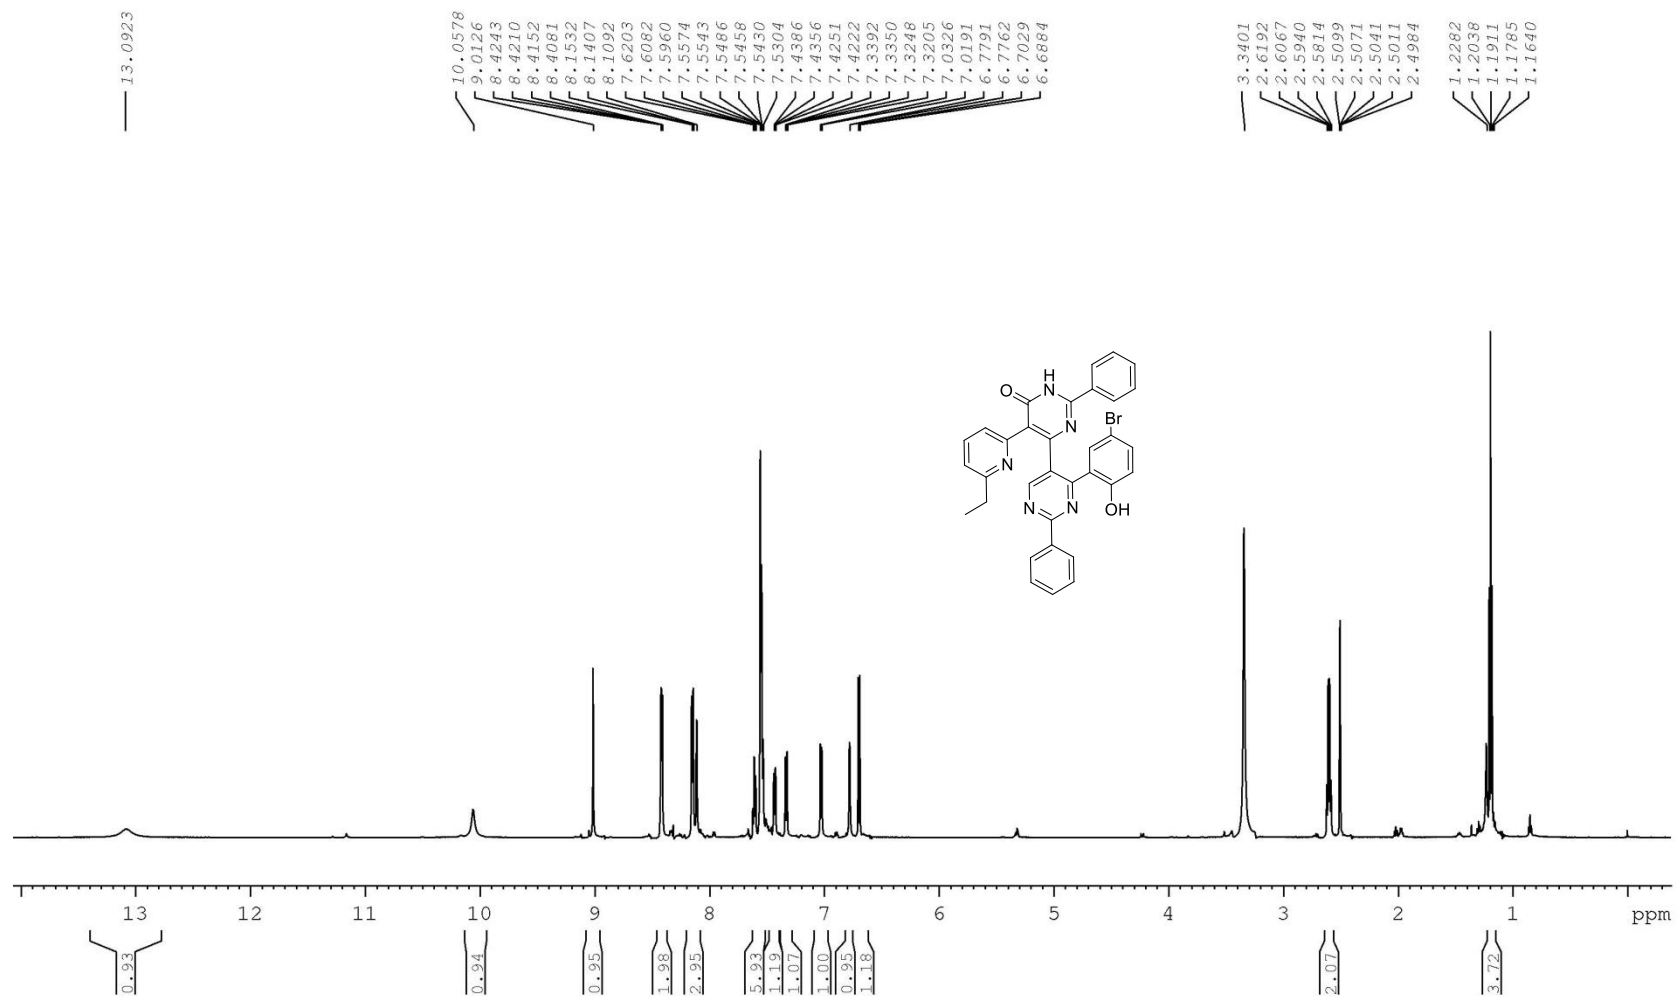

**Figure S79.** <sup>1</sup>H NMR (600 MHz, DMSO-*d*<sub>6</sub>) spectra of compound 5v

DEPT135

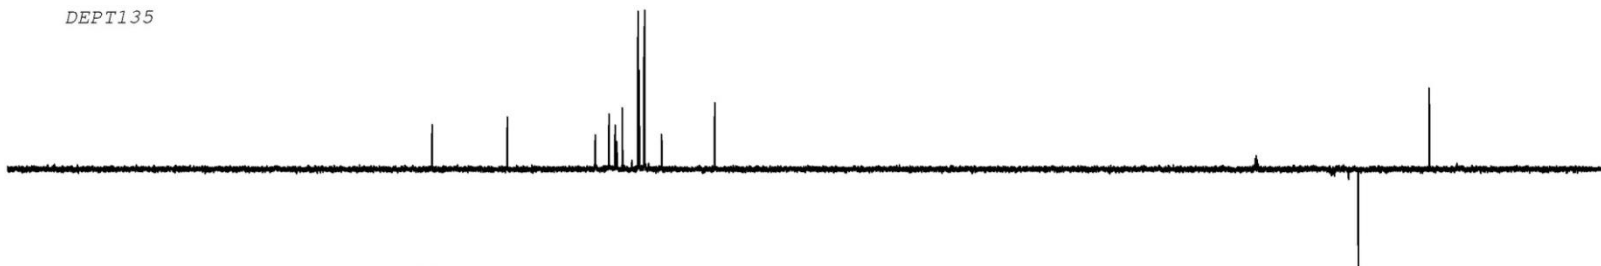

YUNNAN UNIVERSITY ASCEND AVIIIHD600 CLC-09-1  
Jun22-2020-chenli  
C13CPD DMSO

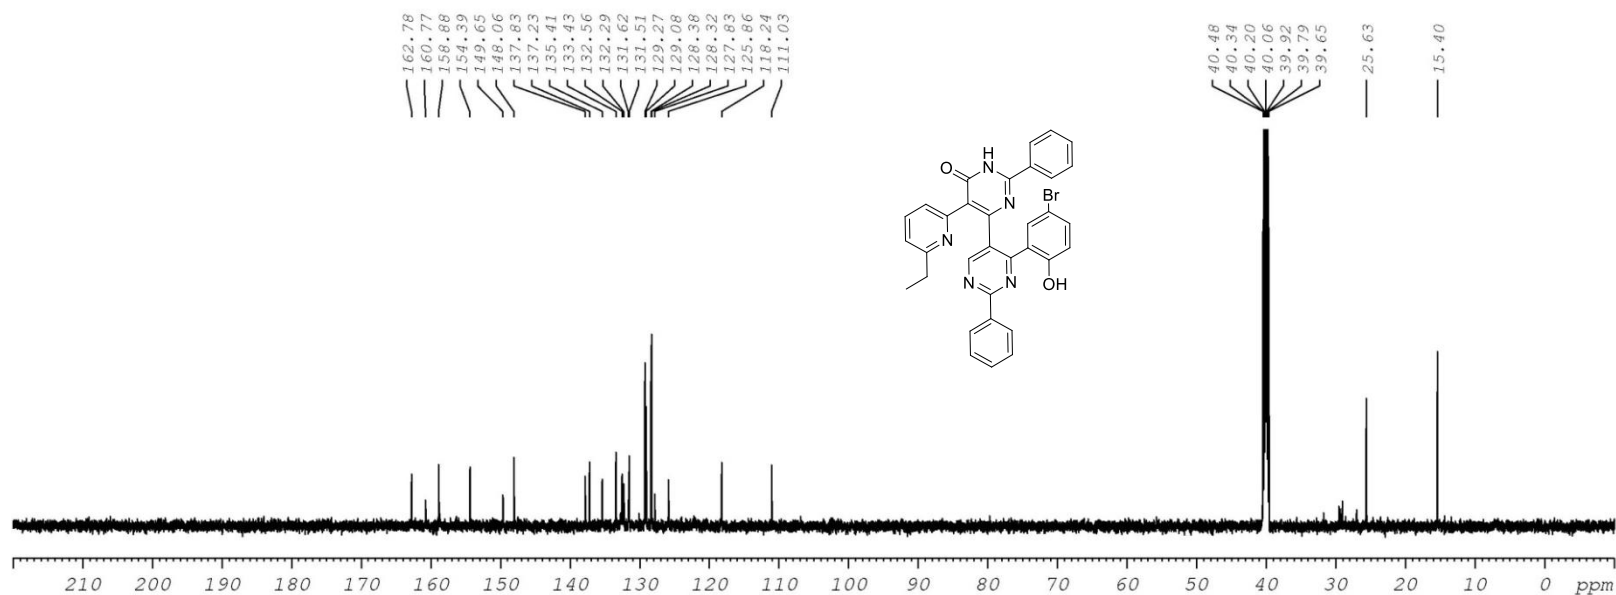

Figure S80.  $^{13}\text{C}$  NMR (150 MHz,  $\text{DMSO-}d_6$ ) spectra of compound **5v**



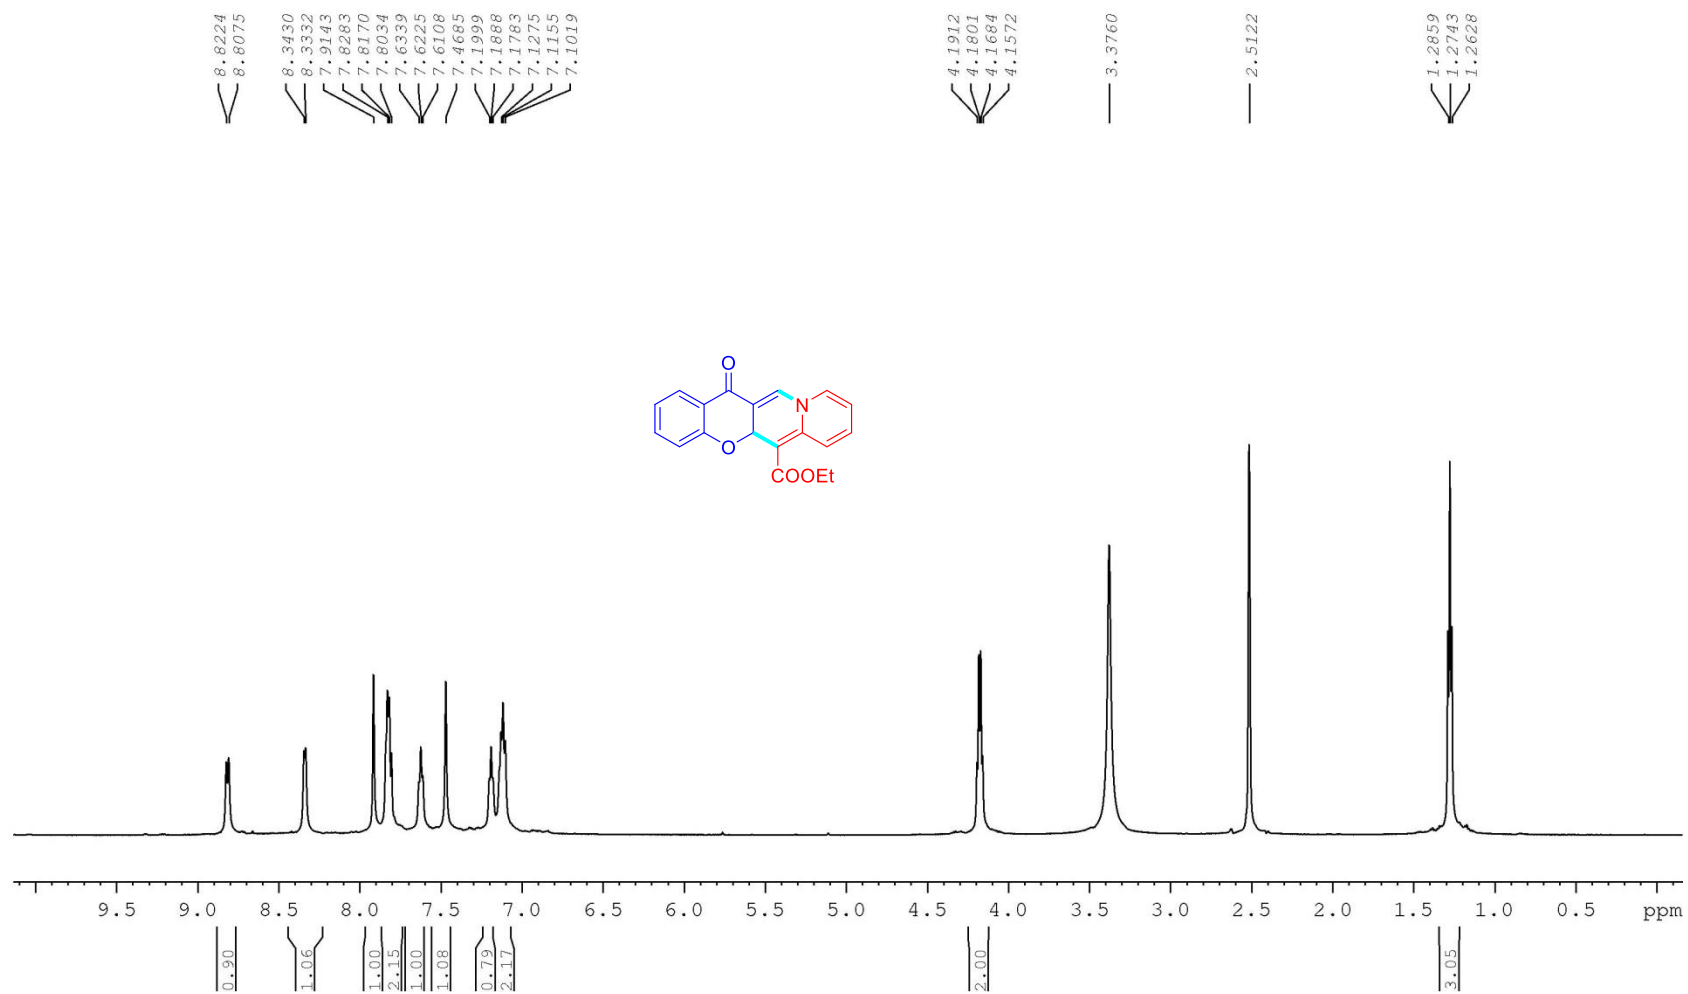

**Figure S81.**  $^1\text{H NMR}$  (600 MHz,  $\text{DMSO-}d_6$ ) spectra of intermediate **9f**

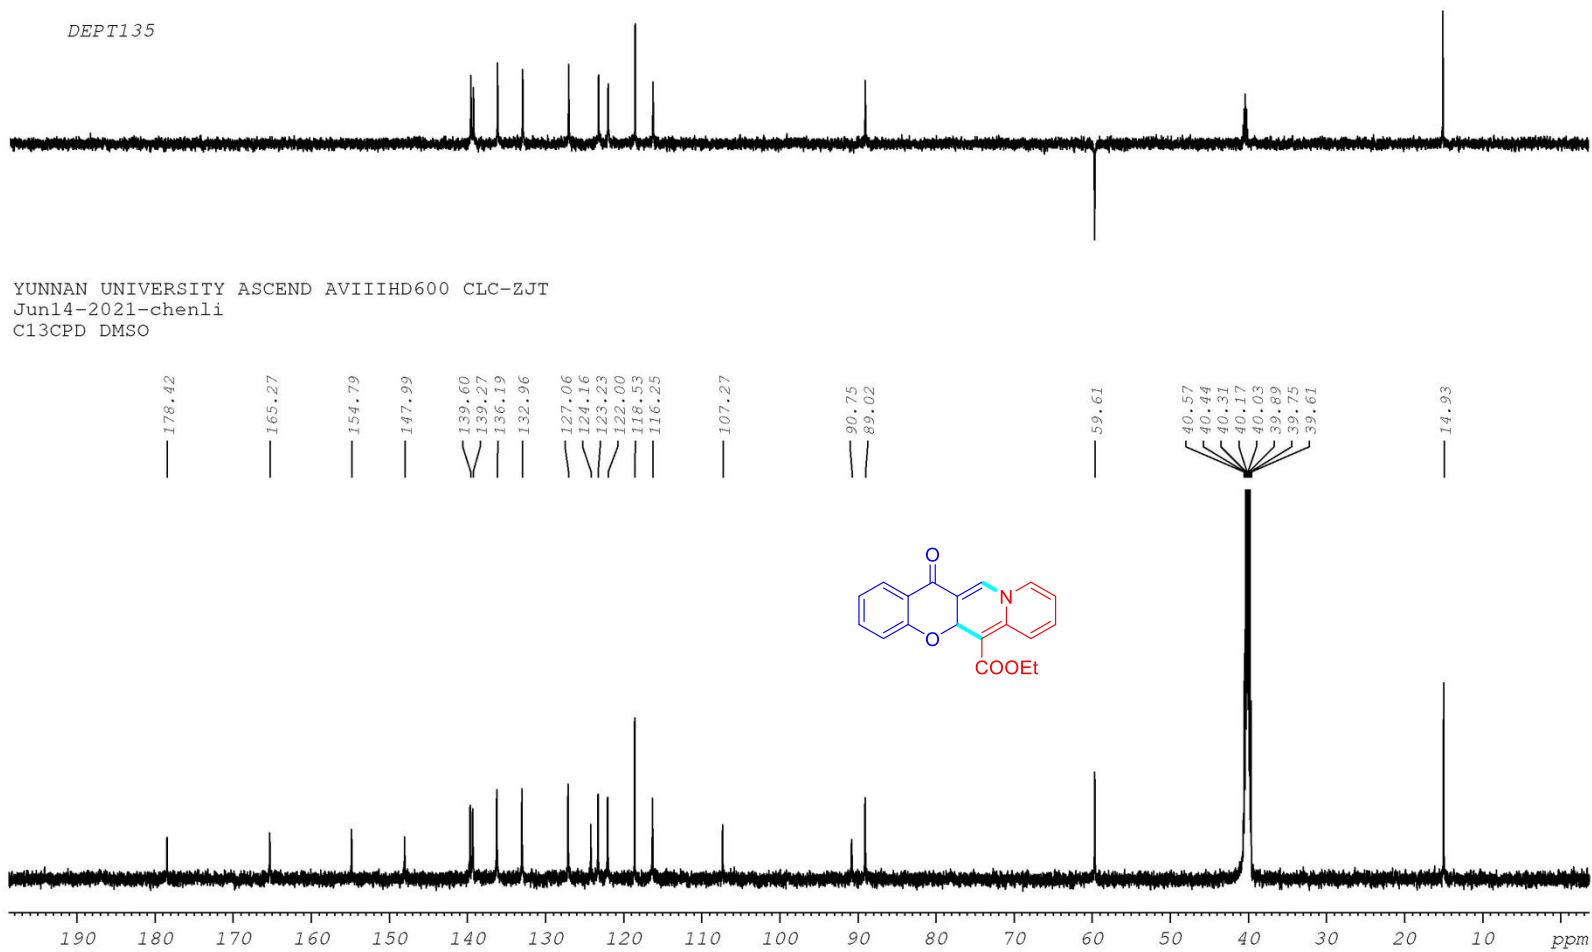

Figure S82.  $^{13}\text{C}$  NMR (150 MHz,  $\text{DMSO-}d_6$ ) spectra of intermediate **9f**

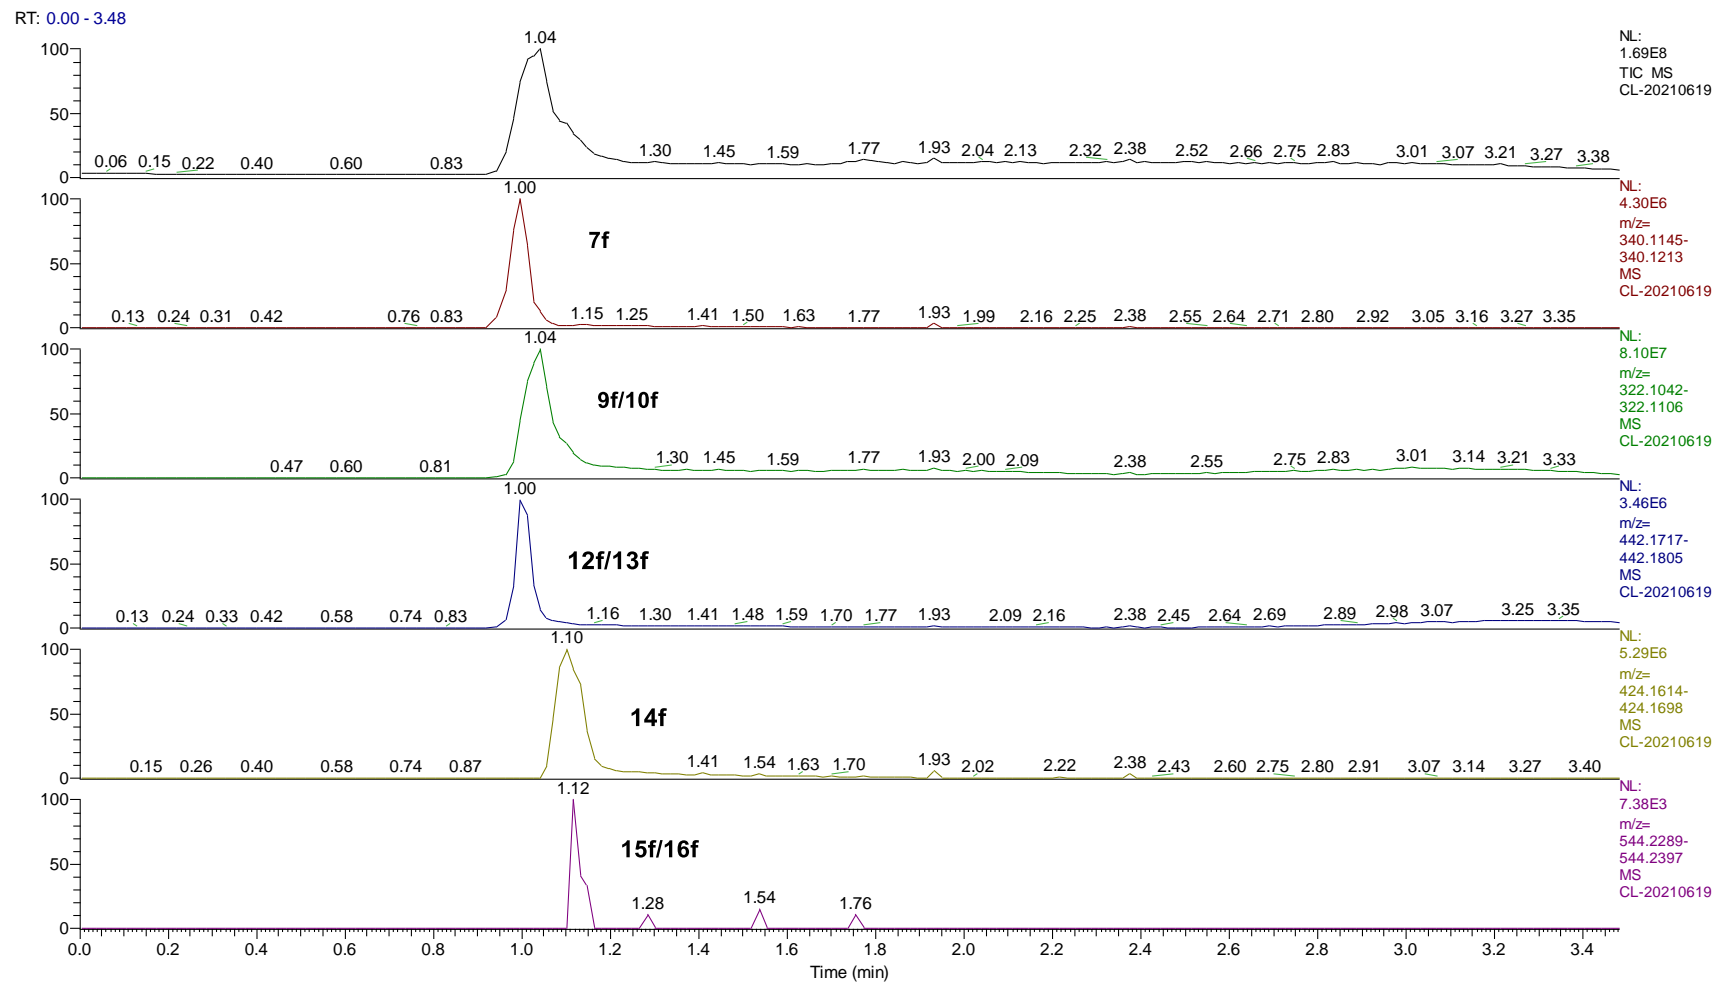

cl-20210618 #195 RT: 2.97 AV: 1 NL: 1.14E4  
T: FTMS + c ESI Full ms [100.00-600.00]

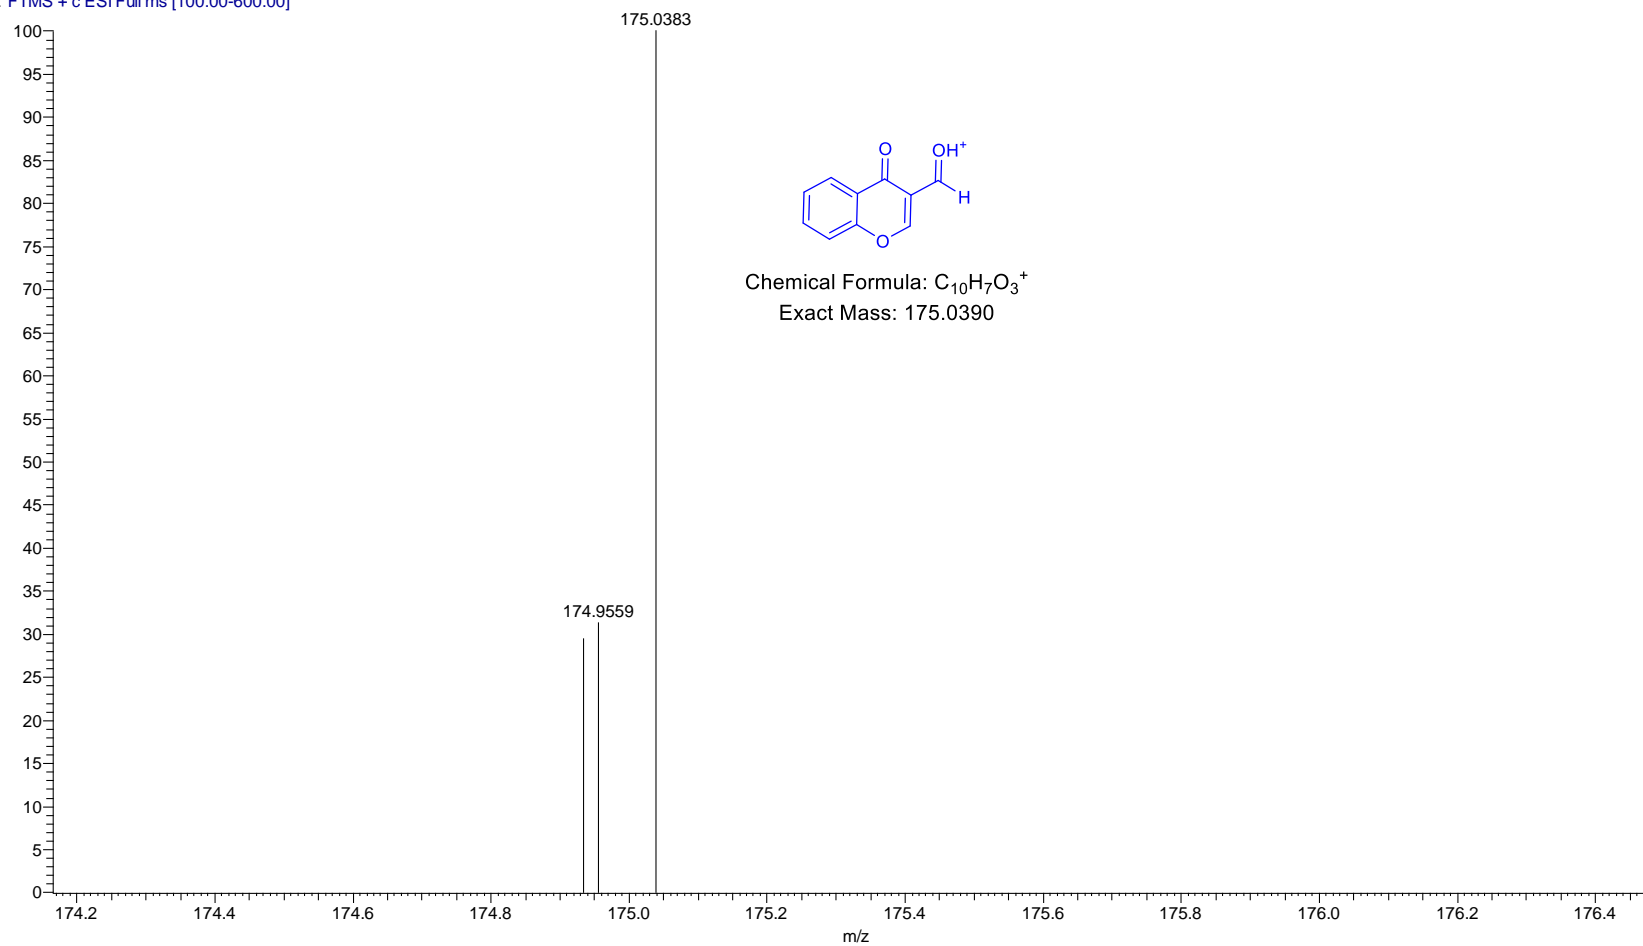

Figure S84. HRMS of intermediate **1f**

cl-20210618 #63 RT: 0.96 AV: 1 NL: 4.43E7  
T: FTMS + c ESI Full ms [100.00-600.00]

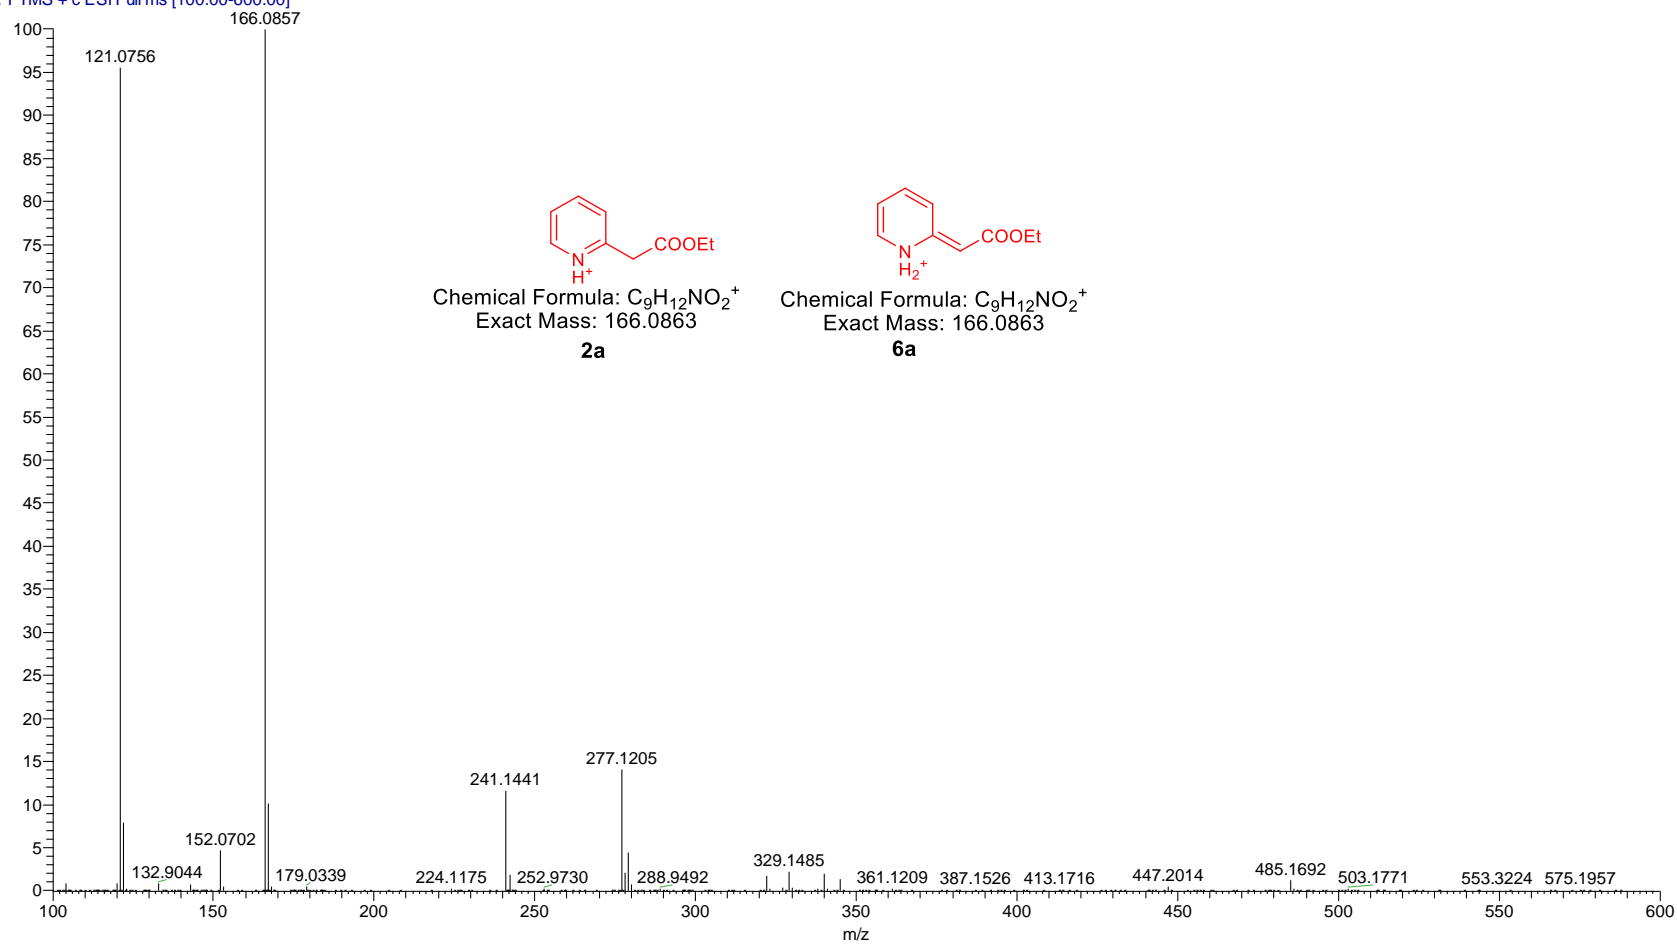

Figure S85. HRMS of intermediate 2a/6a

CL-20210619 #45 RT: 0.98 AV: 1 NL: 3.30E6  
T: FTMS + c ESI Full ms [200.00-700.00]

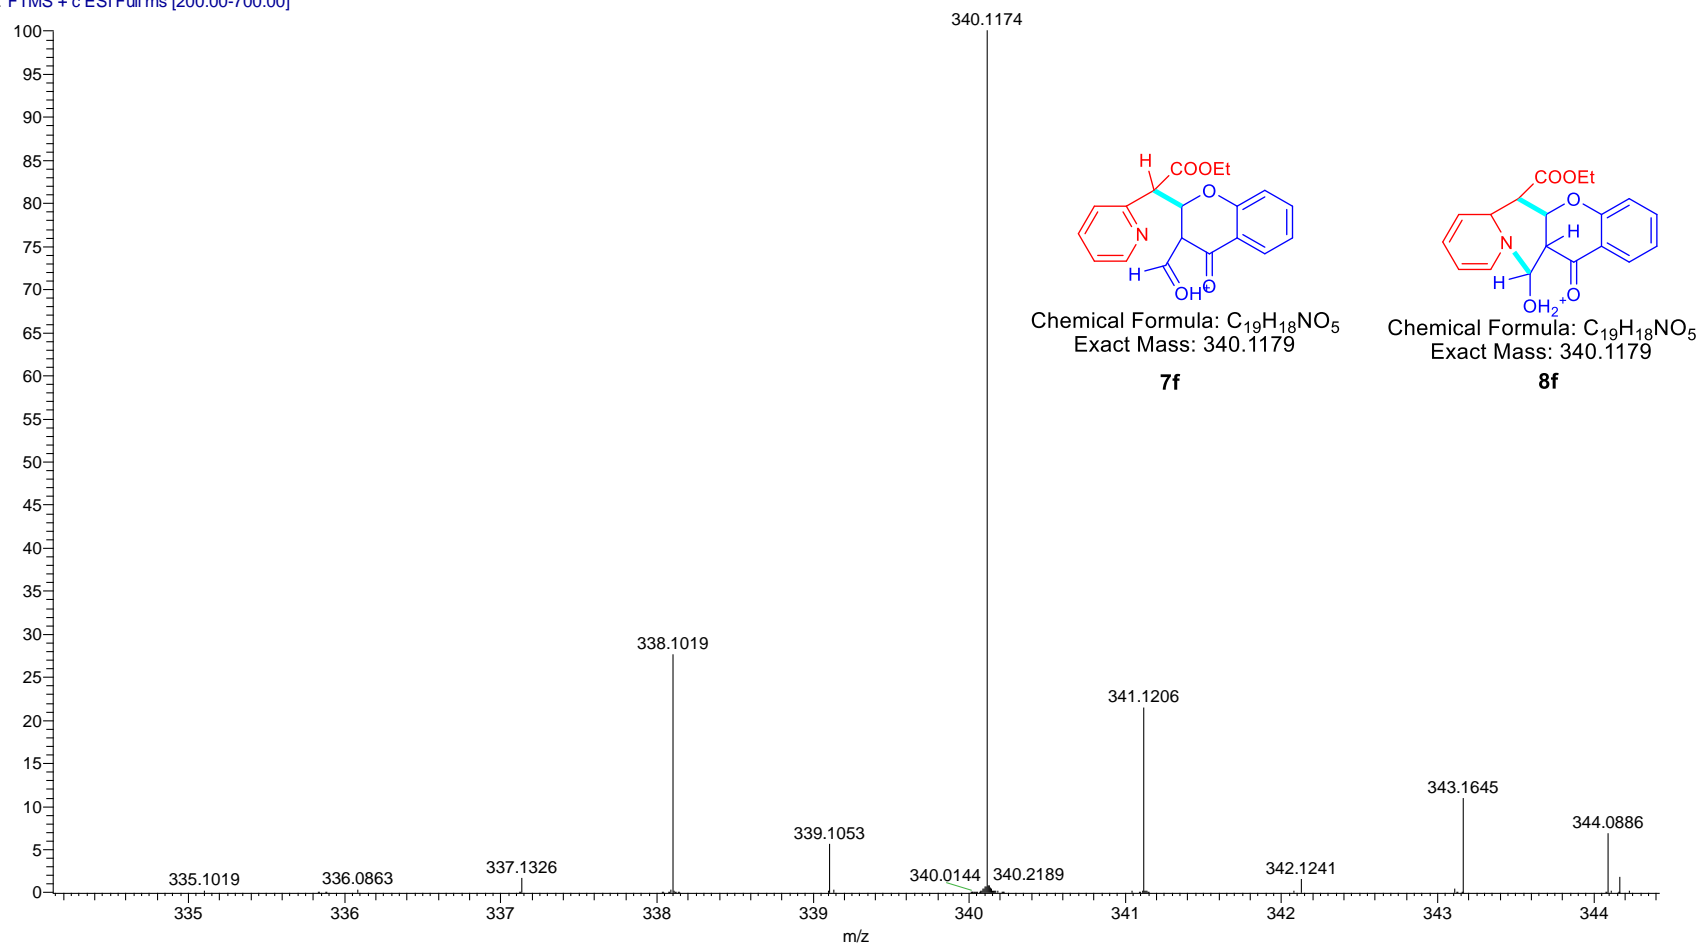

Figure S86. HRMS of intermediate **7f/8f**

CL-20210619 #47 RT: 1.01 AV: 1 NL: 6.14E7  
T: FTMS + c ESI Full ms [200.00-700.00]

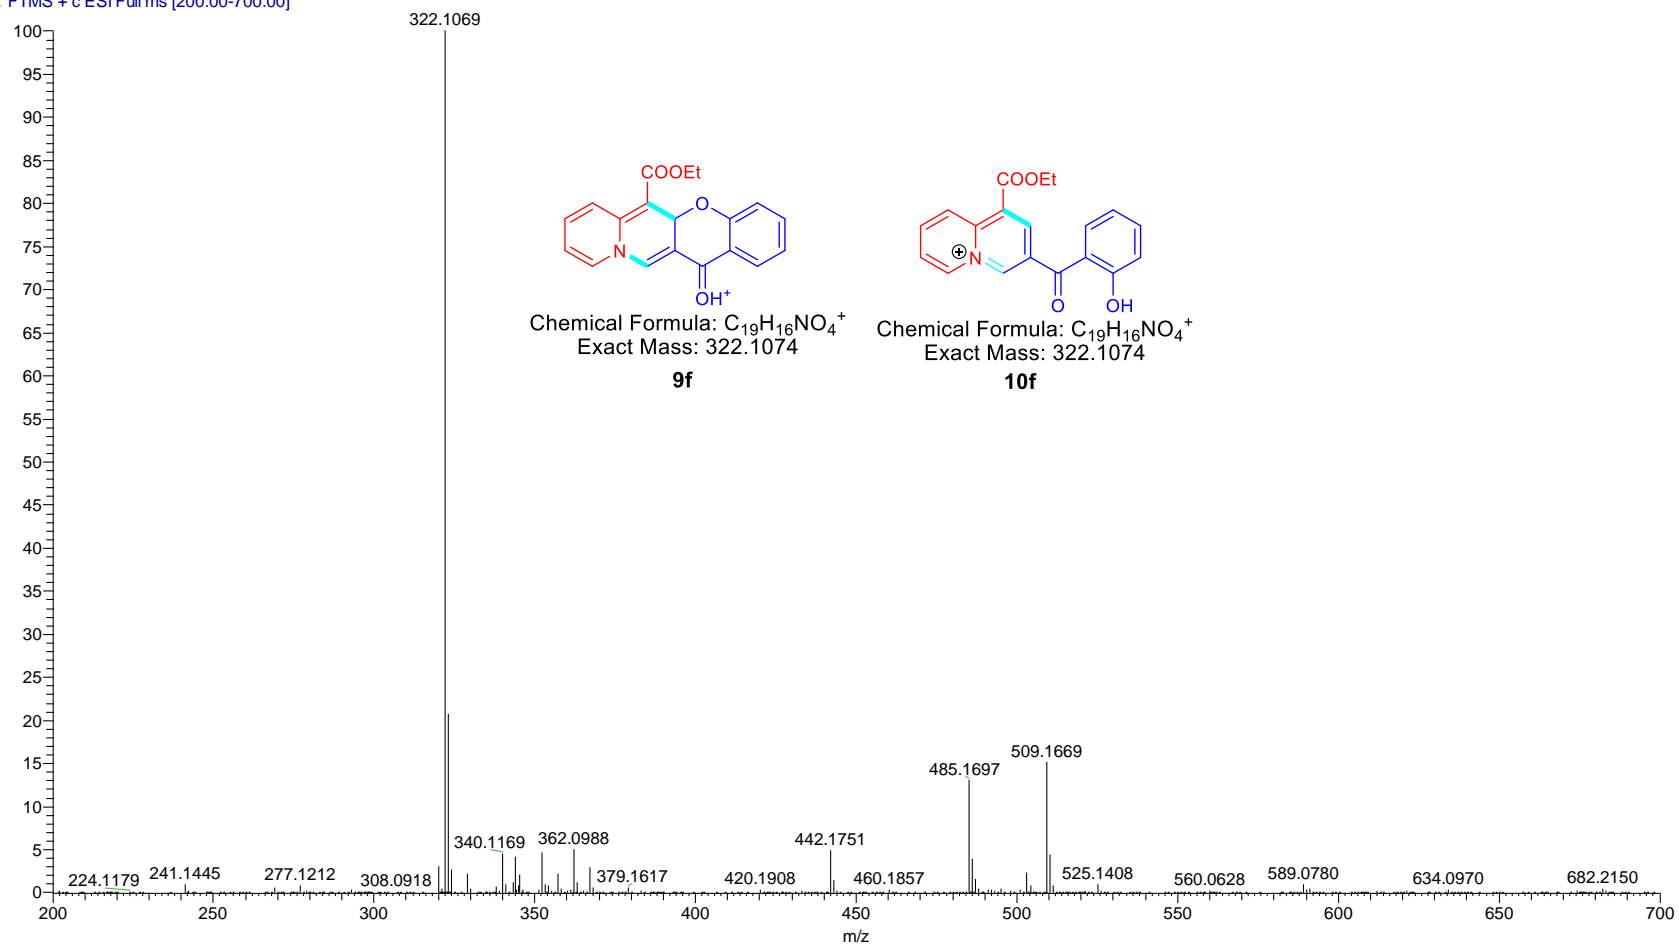

Figure S87. HRMS of intermediate **9f/10f**

CL-20210619 #51 RT: 1.07 AV: 1 NL: 3.52E7  
T: FTMS + c ESI Full ms [200.00-700.00]

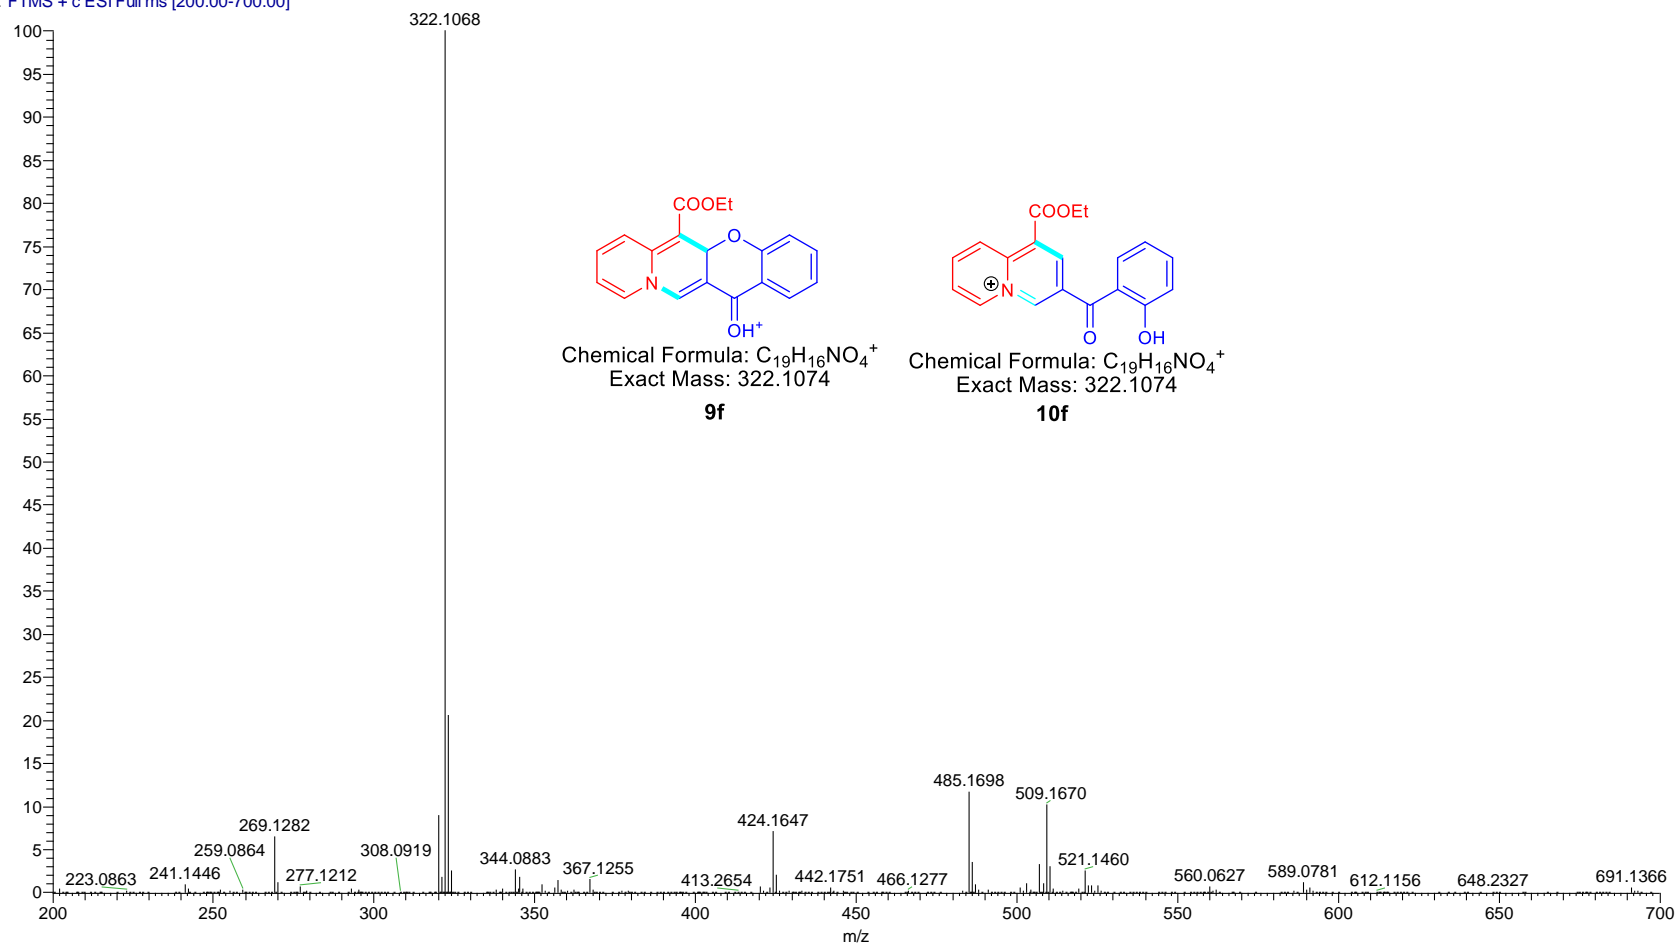

Figure S88. HRMS of intermediate **9f/10f**



CL-20210619 #45 RT: 0.98 AV: 1 NL: 1.13E7  
T: FTMS + c ESI Full ms [200.00-700.00]

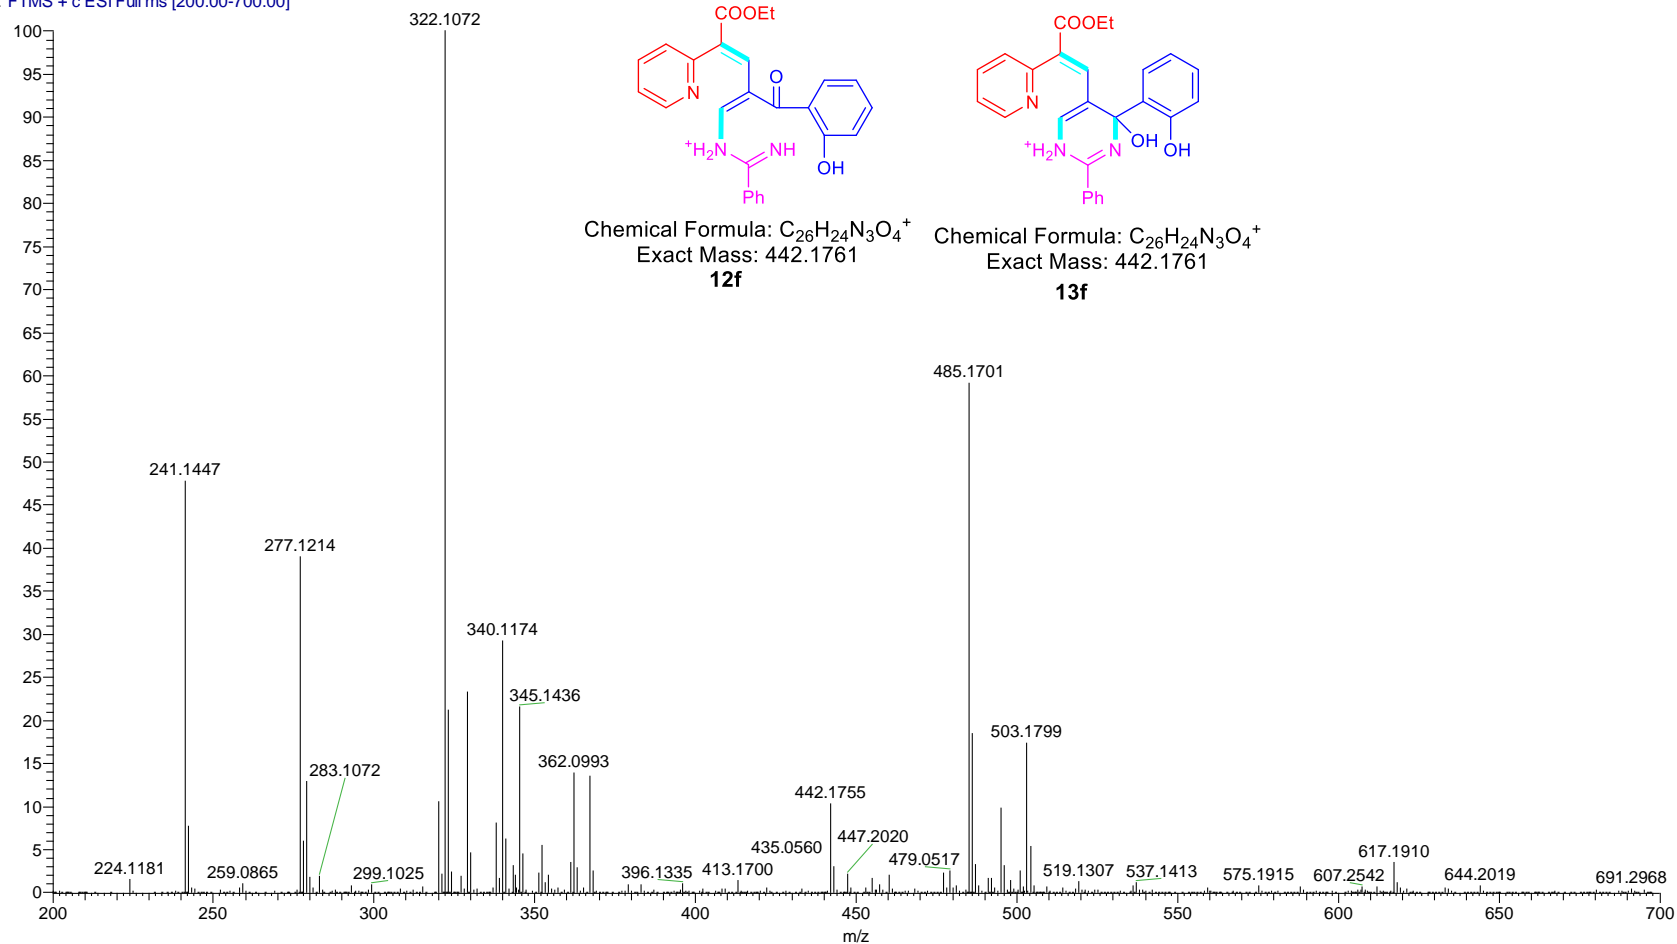

Figure S89. HRMS of intermediate **12f/13f**

CL-20210619 #48 RT: 1.03 AV: 1 NL: 1.49E6  
T: FTMS + c ESI Full ms [200.00-700.00]

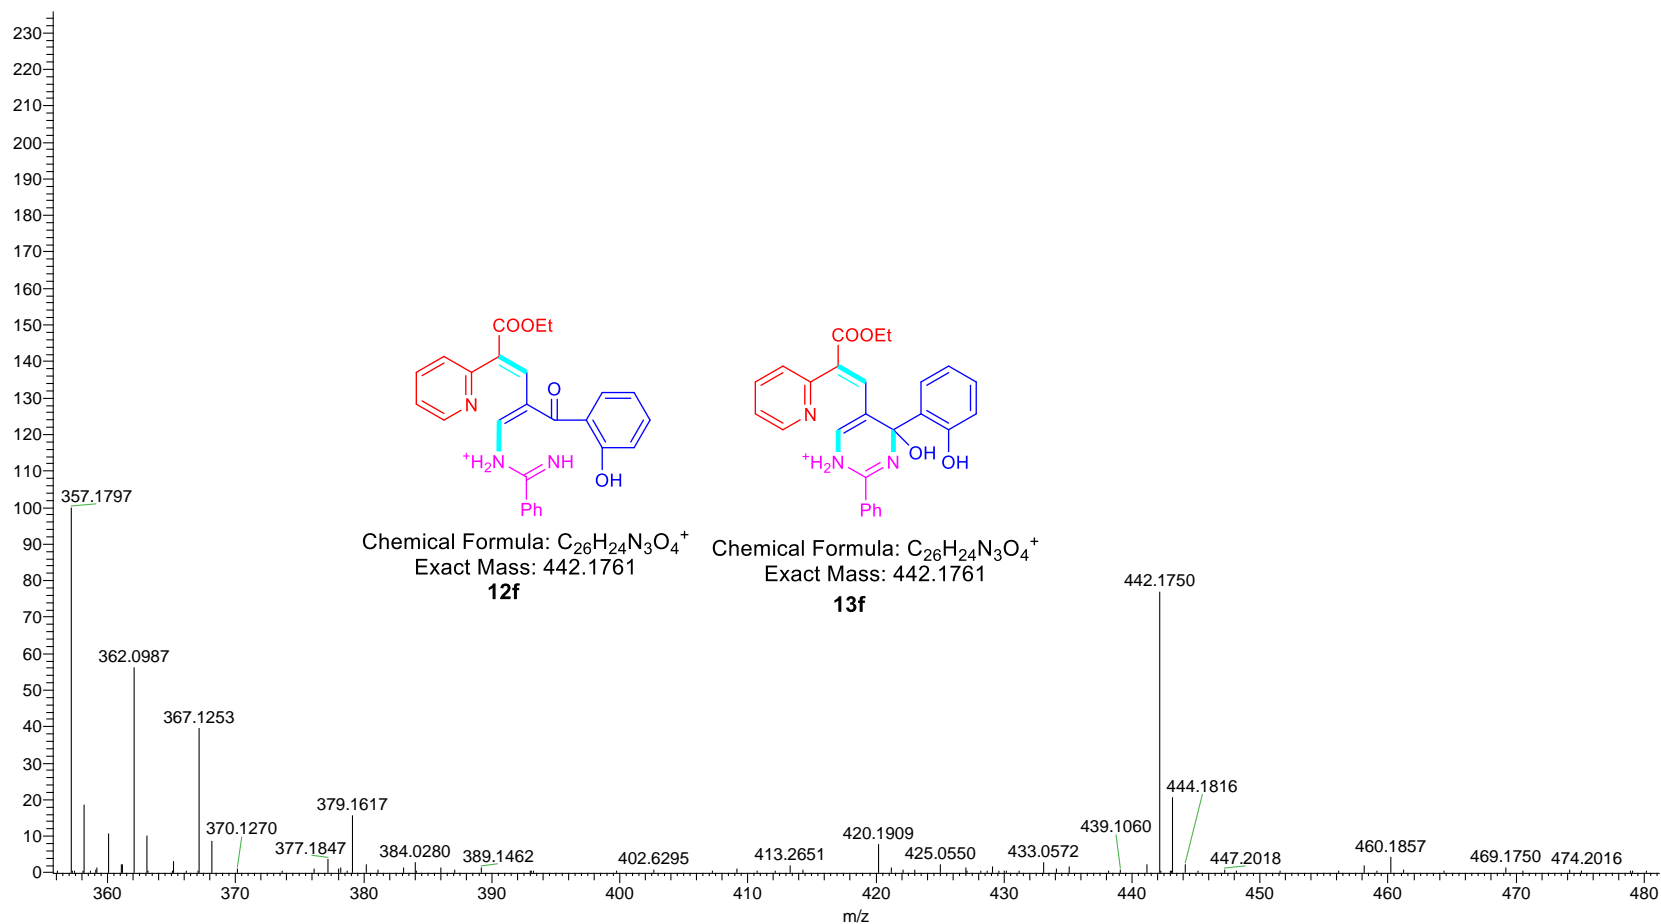

Figure S90. HRMS of intermediate **12f/13f**

CL-20210619 #51 RT: 1.07 AV: 1 NL: 3.52E7  
T: FTMS + c ESI Full ms [200.00-700.00]

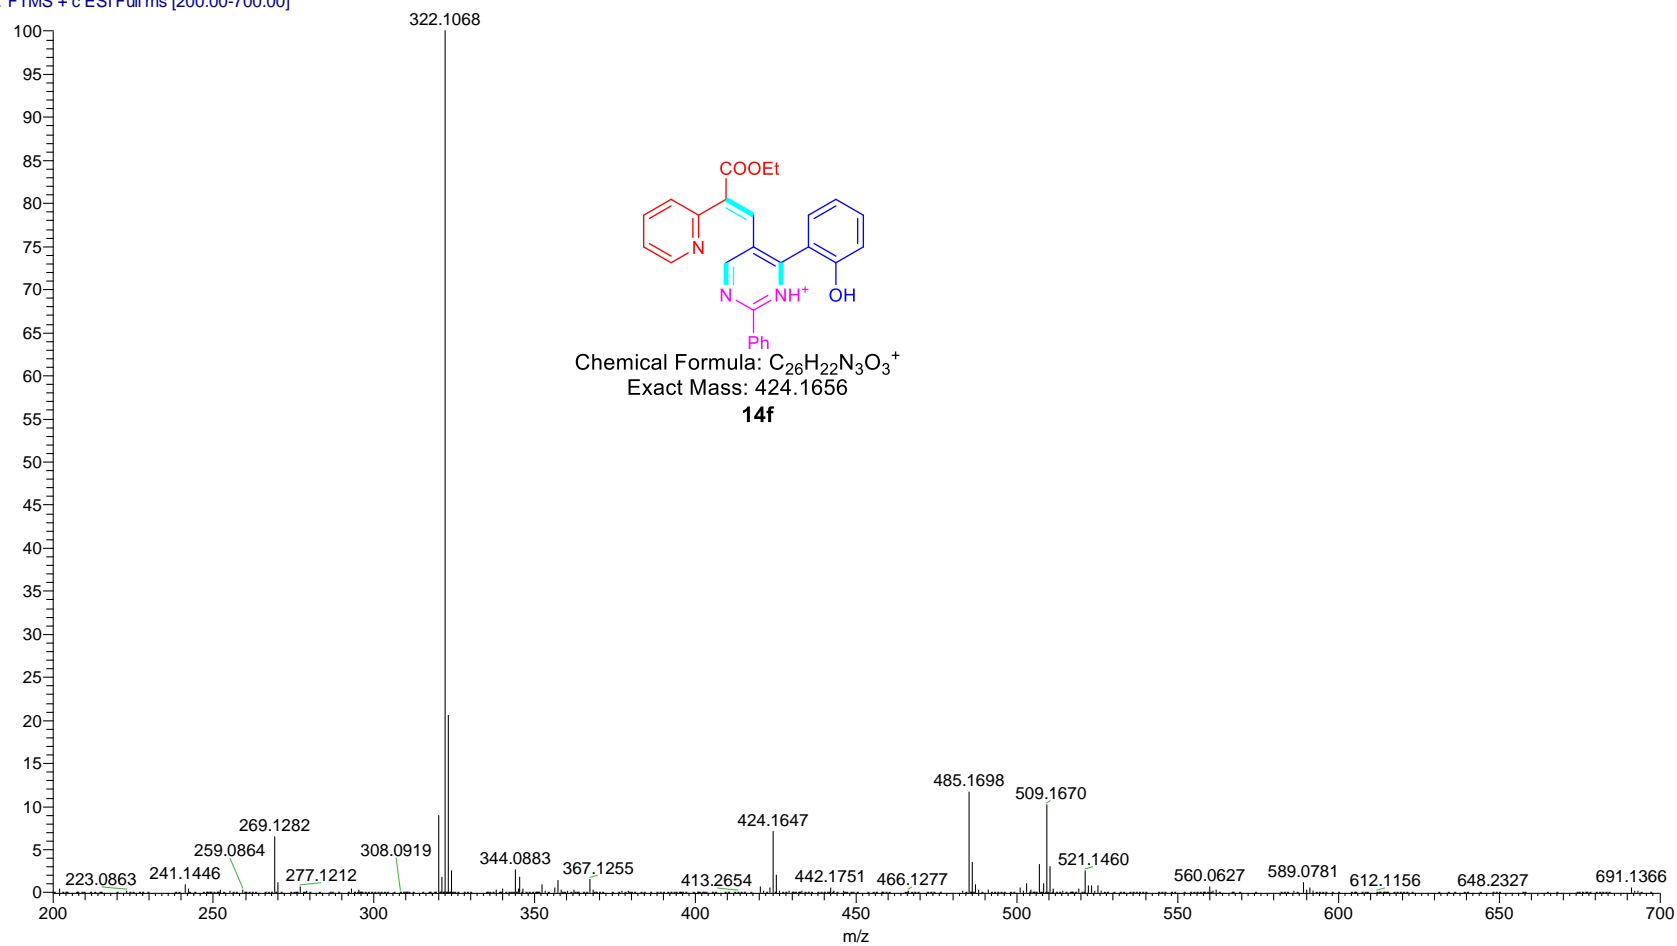

Figure S91. HRMS of intermediate **14f**

CL-20210619 #54 RT: 1.12 AV: 1 NL: 7.38E3  
T: FTMS + c ESI Full ms [200.00-700.00]

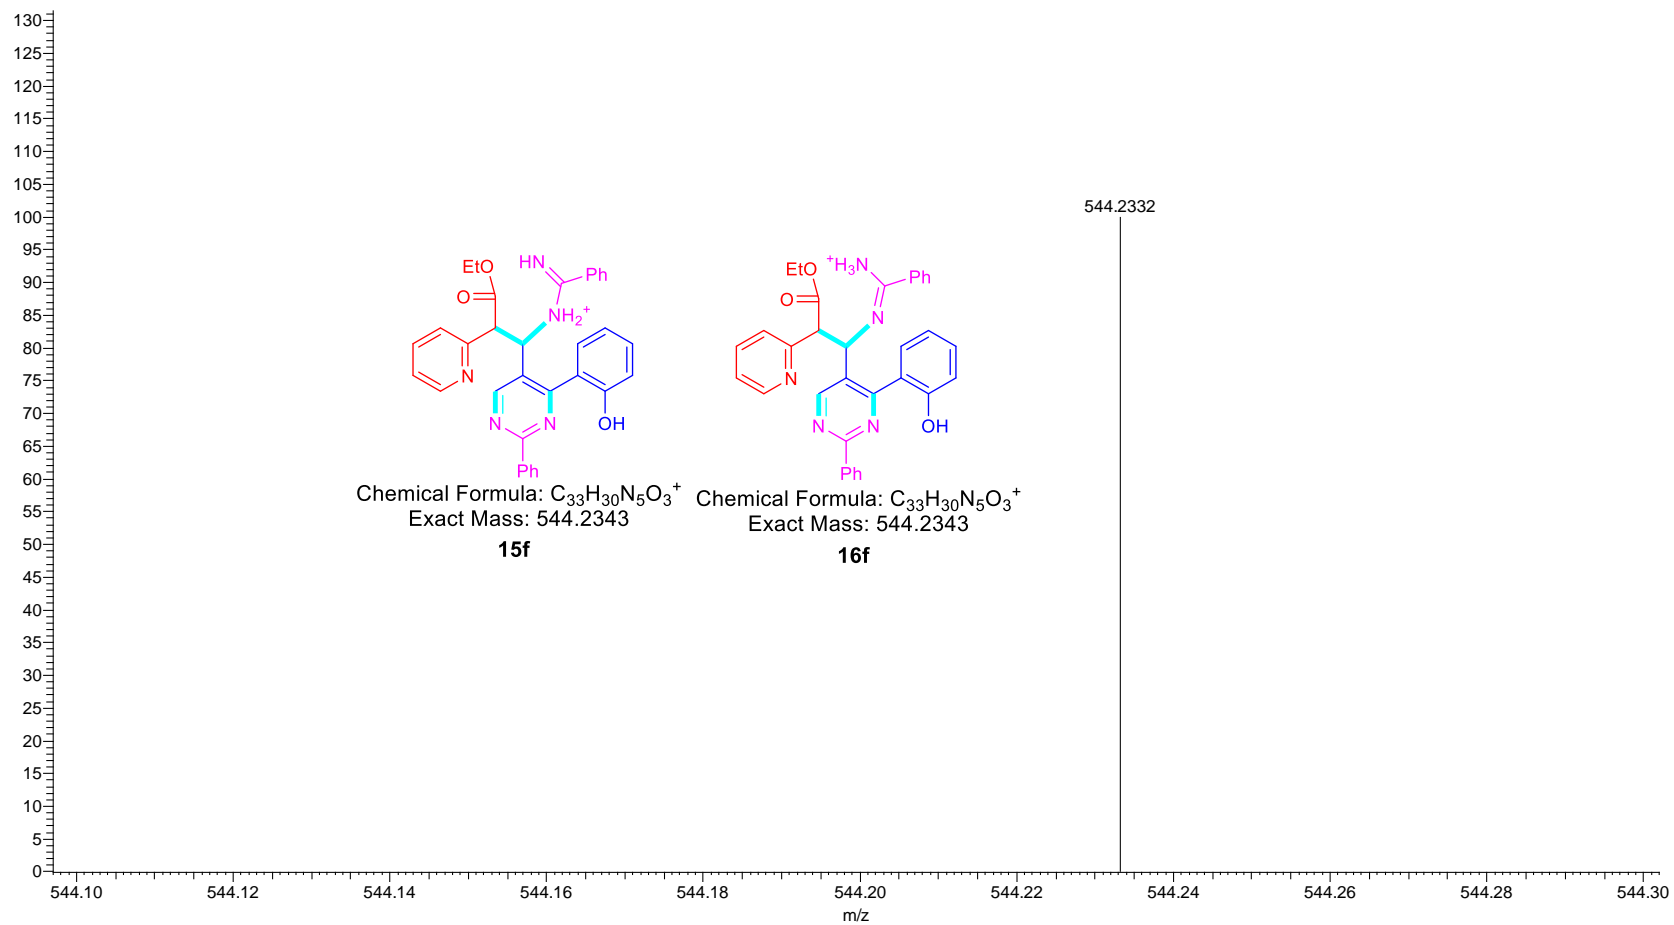

Figure S92. HRMS of intermediate **15f/16f**

CL-20210619 #78 RT: 1.54 AV: 1 NL: 1.15E3  
T: FTMS + c ESI Full ms [200.00-700.00]

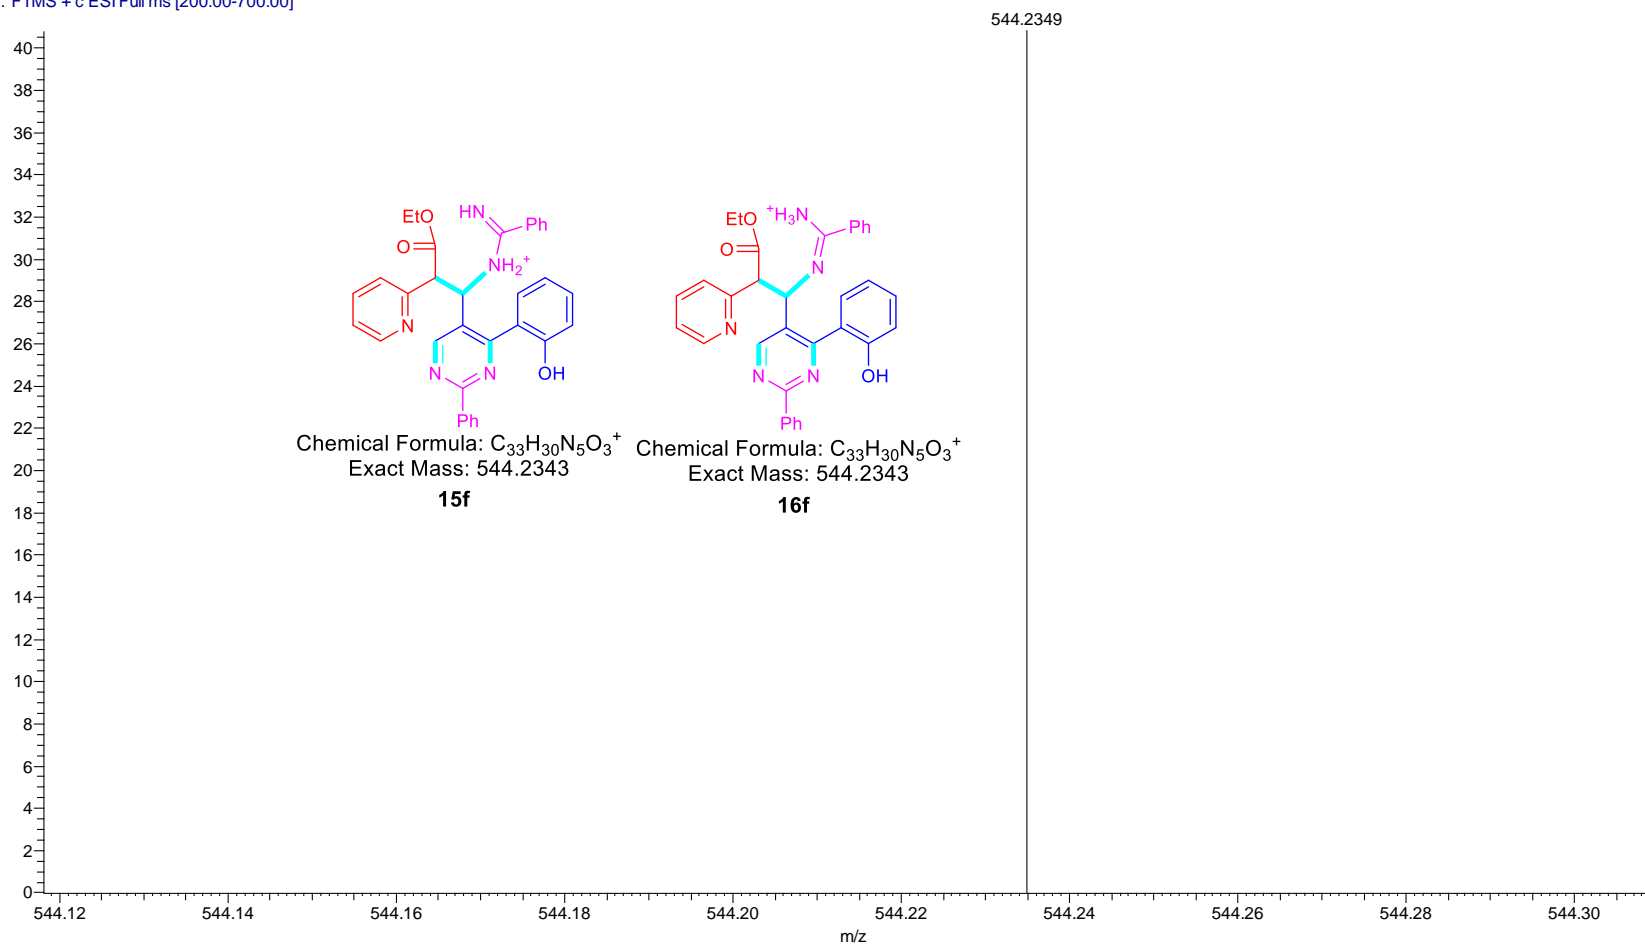

**Figure S93.** HRMS of intermediate **15f/16f**

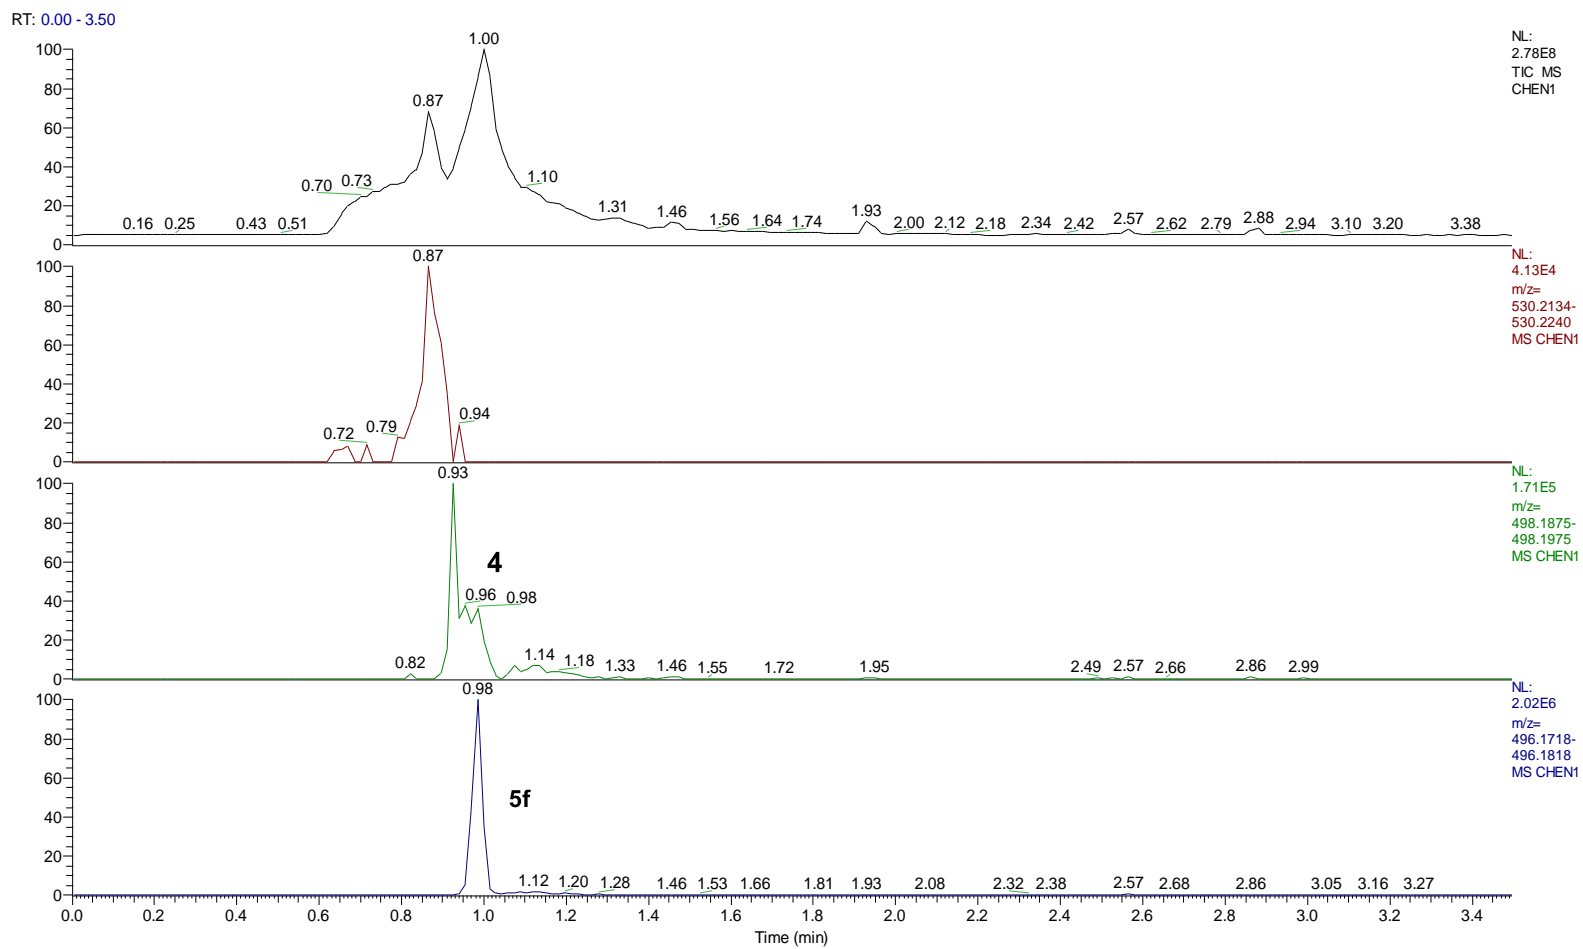

Figure S94. HPLC of the reaction mixture

CHEN1 #55 RT: 0.93 AV: 1 NL: 1.71E5  
T: FTMS + c ESI Full ms [100.00-600.00]

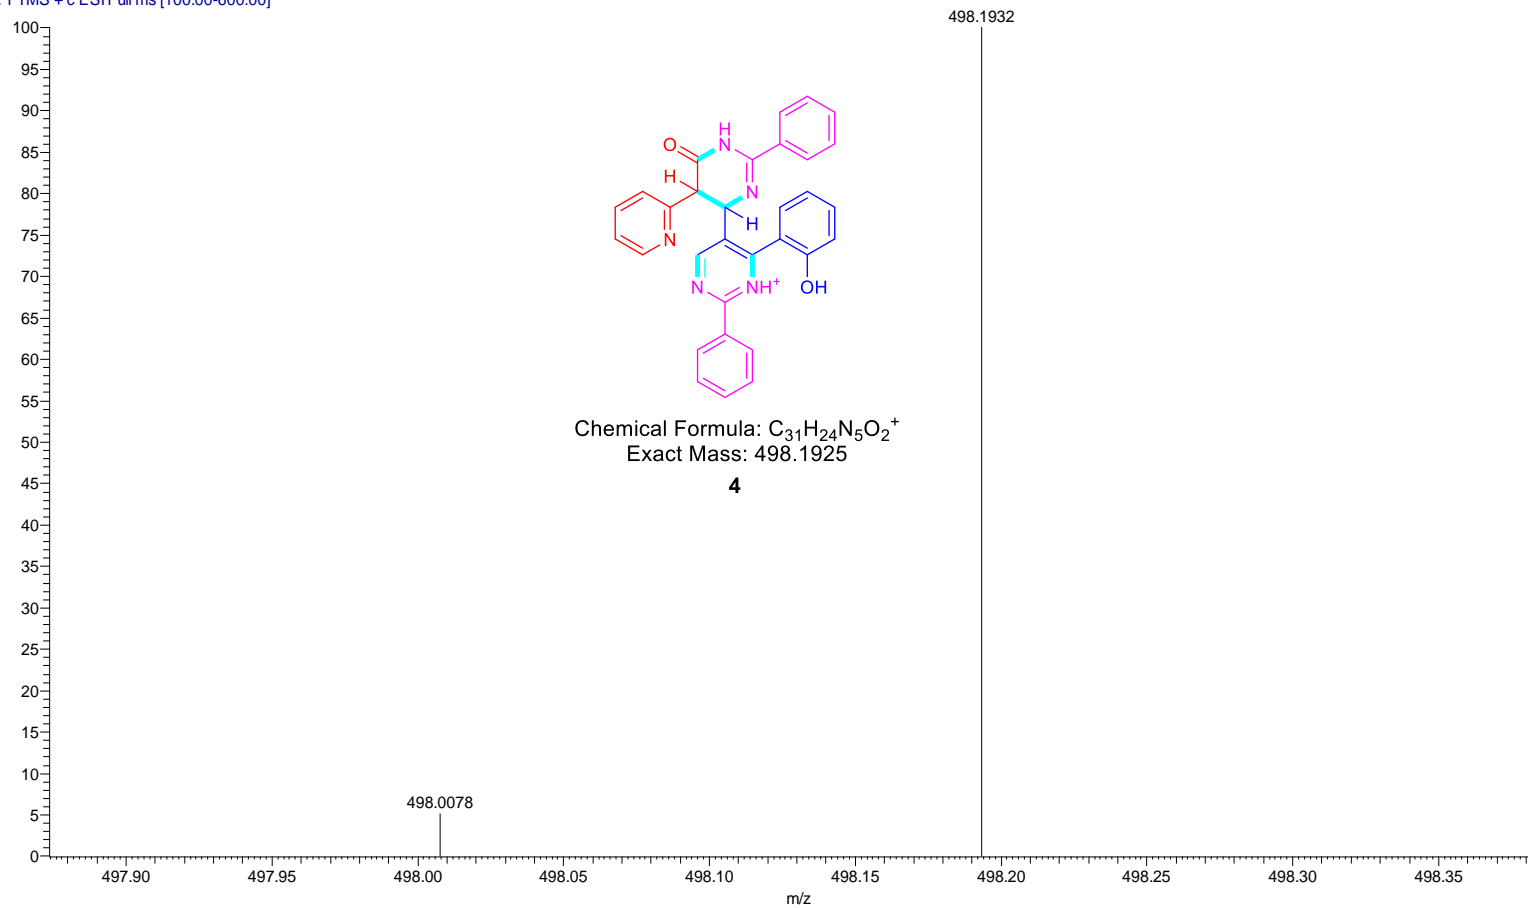

**Figure S95.** HRMS of intermediate **4**

CHEN1 #59 RT: 0.98 AV: 1 NL: 2.02E6  
T: FTMS + c ESI Full ms [100.00-600.00]

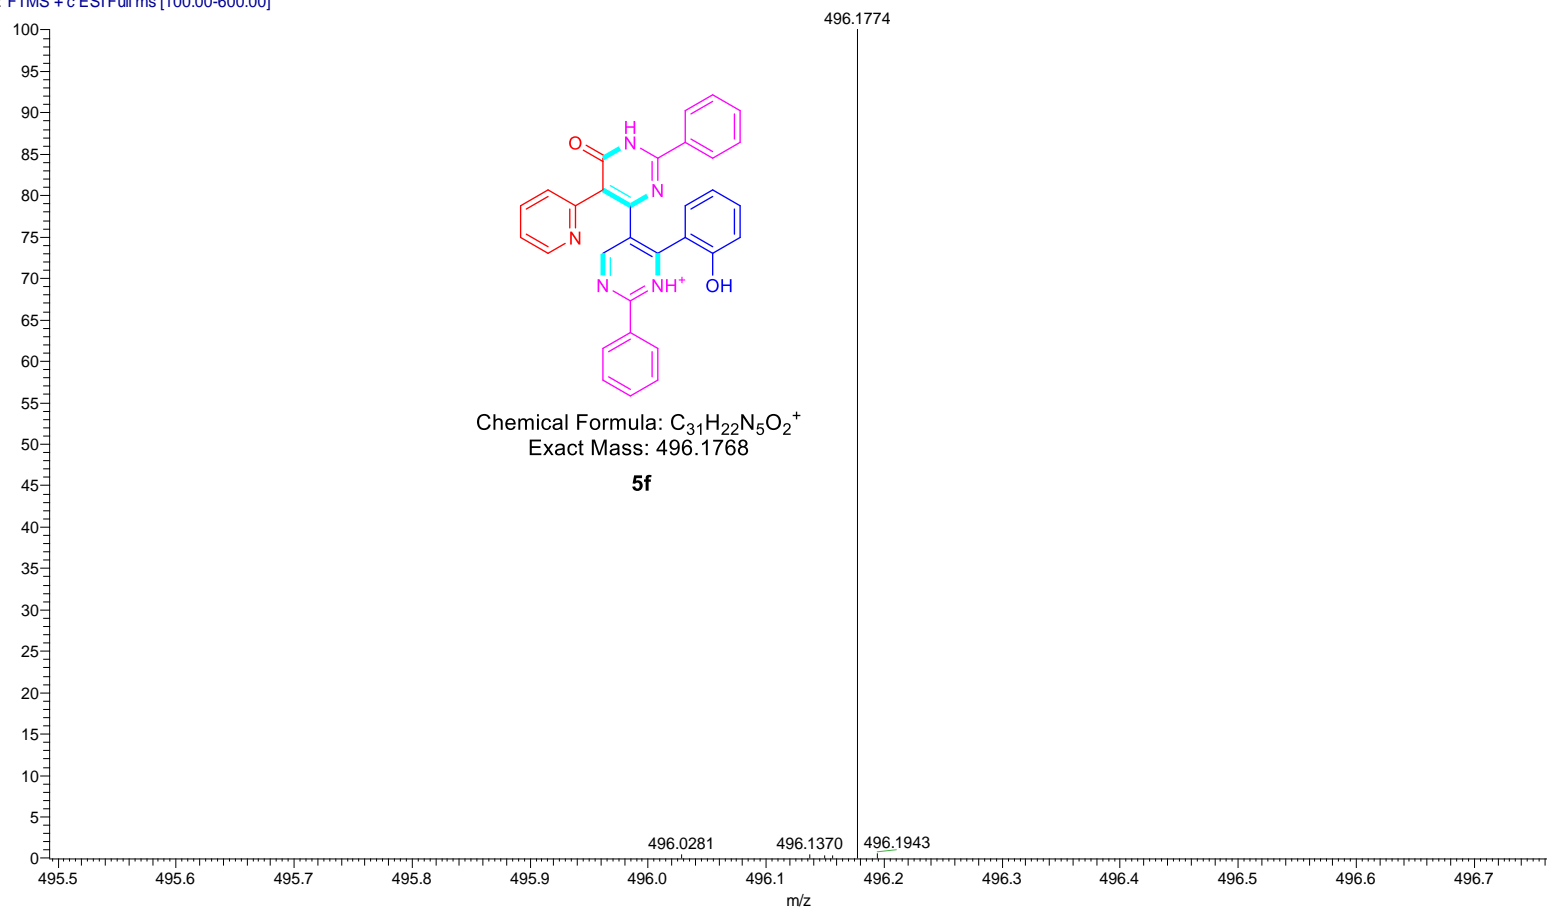

**Figure S96.** HRMS of intermediate **5f**
